# Supplementary material for: Design of a multifunctionalizable BODIPY platform for the facile elaboration of a large series of gold(i)-based optical theranostics
Source: Royal Society of Chemistry journal article supplement (doi:10.1039/c8dt02364f), 2018-01-01
Supplement: c8dt02364f1.pdf [file c8dt02364f1.pdf]

# Design of a multifunctionalizable BODIPY platform for the facile elaboration of a large series of gold(I)-based optical theranostics

Jacques Pliquett,<sup>a,b</sup> Souheila Amor,<sup>a</sup> Miguel Ponce-Vargas,<sup>a</sup> Myriam Laly,<sup>a</sup> Cindy Racœur,<sup>b</sup> Yoann Rousselin,<sup>a</sup> Franck Denat,<sup>a</sup> Ali Bettaïeb,<sup>b</sup> Paul Fleurat-Lessard,<sup>a</sup> Catherine Paul,<sup>\*b</sup> Christine Goze,<sup>\*a</sup> and Ewen Bodio<sup>\*a</sup>

<sup>a</sup> ICMUB UMR6302, CNRS, Univ. Bourgogne Franche-Comté, F-21000 Dijon, France. Tel: +33 (0)3 80 39 60 76; Email: ewen.bodio@u-bourgogne.fr; christine.goze@u-bourgogne.fr

<sup>b</sup> Laboratoire d'Immunologie et Immunothérapie des Cancers, EPHE, PSL Research University, 75000, Paris, France; LIIC, EA7269, Université de Bourgogne Franche Comté, 21000, Dijon, France.

## Content

|                                                    |    |
|----------------------------------------------------|----|
| GENERAL INFORMATION .....                          | 4  |
| SYNTHETIC PROCEDURE + NMR SPECTRA .....            | 4  |
| Triphenylphosphonium-ethylammonium dibromide ..... | 5  |
| BODIPY 3 .....                                     | 7  |
| BODIPY 3-acid chloride.....                        | 11 |
| BODIPY 4 .....                                     | 13 |
| BODIPY 5 .....                                     | 16 |
| BODIPY 6 .....                                     | 20 |
| BODIPY 7 .....                                     | 24 |
| BODIPY 8 .....                                     | 28 |
| BODI-Au-7.....                                     | 32 |
| BODI-Au-8.....                                     | 36 |
| BODI-Au-9.....                                     | 40 |
| BODI-Au-10 .....                                   | 44 |
| BODI-Au-11 .....                                   | 48 |
| BODI-Au-12 .....                                   | 52 |
| BODI-Au-13 .....                                   | 56 |
| BODI-Au-14 .....                                   | 60 |
| BODI-Au-15 .....                                   | 64 |

|                                                      |    |
|------------------------------------------------------|----|
| BODI-Au-16 .....                                     | 69 |
| BODI-Au-17 .....                                     | 73 |
| PHOTOPHYSICAL DATA.....                              | 77 |
| THEORETICAL CALCULATION.....                         | 81 |
| Computational details.....                           | 81 |
| Results and Discussion .....                         | 81 |
| DETERMINATION OF CYTOTOXIC PROPERTIES.....           | 83 |
| <i>IN VITRO</i> CONFOCAL MICROSCOPY EXPERIMENTS..... | 85 |
| BODIPY 1 .....                                       | 86 |
| BODIPY 3 .....                                       | 86 |
| BODIPY 4 .....                                       | 87 |
| BODIPY 5 .....                                       | 87 |
| BODIPY 6 .....                                       | 88 |
| BODIPY 7 .....                                       | 88 |
| BODIPY 8 .....                                       | 89 |
| BODI-Au-7.....                                       | 89 |
| BODI-Au-8.....                                       | 90 |
| BODI-Au-9.....                                       | 90 |
| BODI-Au-10 .....                                     | 91 |
| BODI-Au-11 .....                                     | 91 |
| BODI-Au-12 .....                                     | 92 |
| BODI-Au-13 .....                                     | 92 |
| BODI-Au-14 .....                                     | 93 |
| BODI-Au-15 .....                                     | 93 |
| BODI-Au-16 .....                                     | 94 |
| BODI-Au-17 .....                                     | 94 |
| X-RAY STRUCTURES .....                               | 95 |
| Compound 2.....                                      | 95 |

|                     |     |
|---------------------|-----|
| Compound 3 .....    | 104 |
| BODI-Au-7 .....     | 117 |
| BODI-Au-10 .....    | 139 |
| SHAPE Analysis..... | 149 |
| REFERENCES.....     | 150 |

## General information

Unless stated otherwise reactions were carried out in technical grade solvents under normal atmosphere. Technical grade solvents were purchased from BioSolve. Dry solvents were non-stabilized, purchased from Carlo Erba and dried using a MB-SPS-800 (MBraun) or PureSolv-MD-5 (Inert®). All reagents were purchased from SigmaAldrich or ACROS Organics™ and used as received without further purification. Column chromatography was carried out using silica gel (SigmaAldrich; 40-63µm 230-400mesh 60Å). Analytical thin-layer chromatography was performed with Merck 60 F254 silica gel (precoated sheets, 0.2 mm thick). Reactions were monitored by thin-layer chromatography, RP-HPLC-MS and no-lock <sup>31</sup>P-NMR.

## Synthetic procedure + NMR spectra

Gold(I)-amino-phosphine, BODIPY derivatives **1** and **2**, were synthesized thanks to reported procedures.<sup>1-3</sup>

**NMR spectra:** (<sup>1</sup>H, <sup>13</sup>C, <sup>11</sup>B, <sup>19</sup>F) were recorded at 300K on Bruker 300 Avance III or 500 Avance III spectrometers. Chemical shifts are given relative to TMS (<sup>1</sup>H, <sup>13</sup>C), BF<sub>3</sub>\*Et<sub>2</sub>O (<sup>11</sup>B), CFCl<sub>3</sub> (<sup>19</sup>F) and H<sub>3</sub>PO<sub>4</sub> (<sup>31</sup>P) and were referenced to the residual solvent signal. High resolution mass spectra were recorded on a Thermo LTQ Orbitrap XL ESI-MS spectrometer. NMR and Mass-analyses were performed at the "Plateforme d'Analyse Chimique et de Synthèse Moléculaire de l'Université de Bourgogne" (PACSMUB).

## Triphenylphosphonium-ethylammonium dibromide

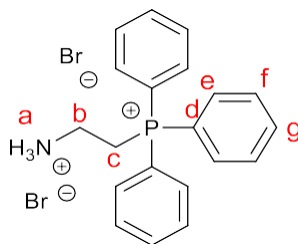

2g (7.63mmol, 1eq) PPh<sub>3</sub> and 1.562g (7.63mmol, 1eq) bromoethylamine hydrobromide were dissolved in 150 mL acetonitrile and refluxed for 72h. The reaction was stopped upon total consumption of PPh<sub>3</sub>. Acetonitrile was evaporated and the crude product redissolved in 10 mL of MeOH. The product was crushed out with ice-cold Et<sub>2</sub>O (300 mL). The solid was collected and the washing repeated twice to obtain 1.771g (3.82 mmol, yield = 50%) of the target compound as a white powder.

<sup>1</sup>H NMR (500 MHz, DMSO-d<sub>6</sub>) δ (ppm) = 3.13–3.07 (m, 2H), 4.05–3.97 (m, 2H), 7.80 (td, *J* = 7.8, 3.7 Hz, 6H), 7.86 (ddd, *J* = 13.0, 8.5, 1.4 Hz, 6H), 7.94 (td, *J* = 7.3, 1.8 Hz, 3H), 8.36 (s, 3H).

<sup>31</sup>P NMR (202 MHz, DMSO-d<sub>6</sub>) δ (ppm) = 21.39 (s).

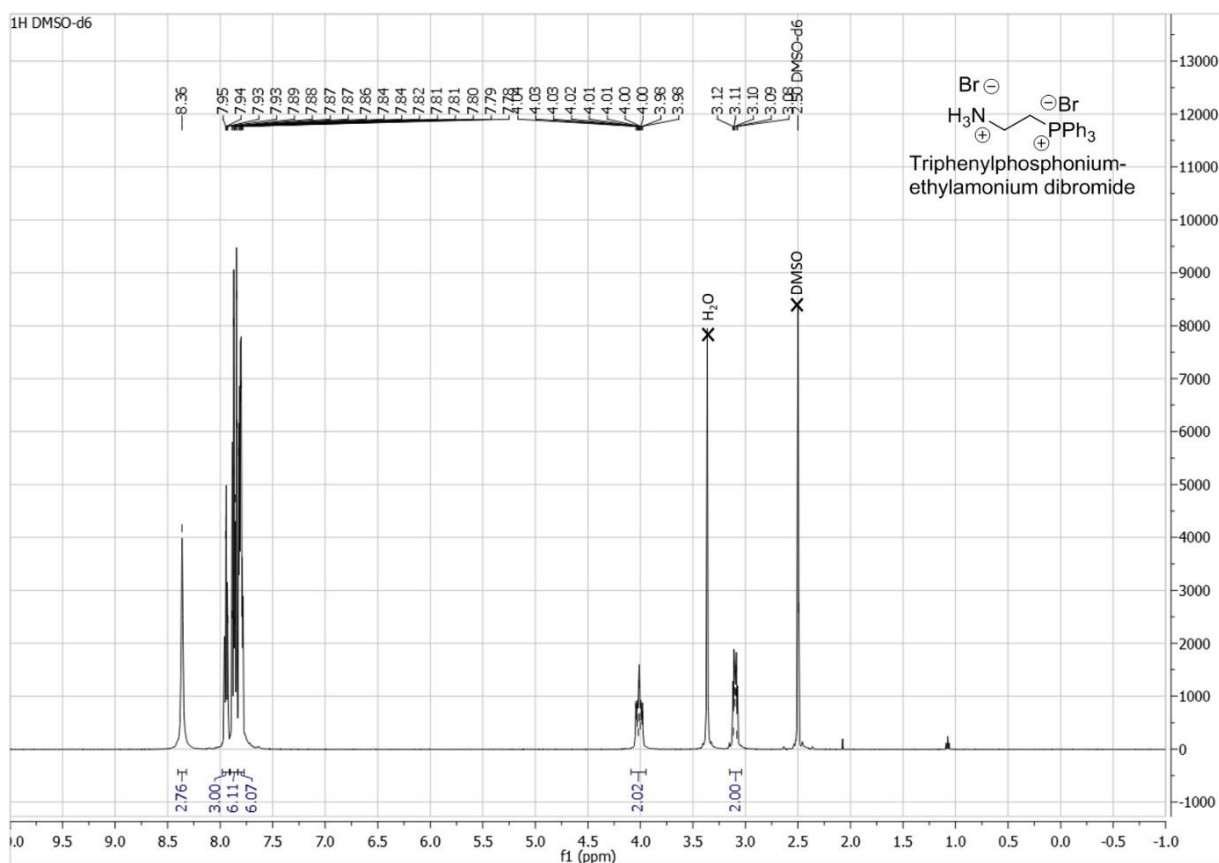

Figure S 1: <sup>1</sup>H NMR of 2-(Diphenylphosphino)ethylamine-aurichloride (CDCl<sub>3</sub>, 126 MHz, 300K)

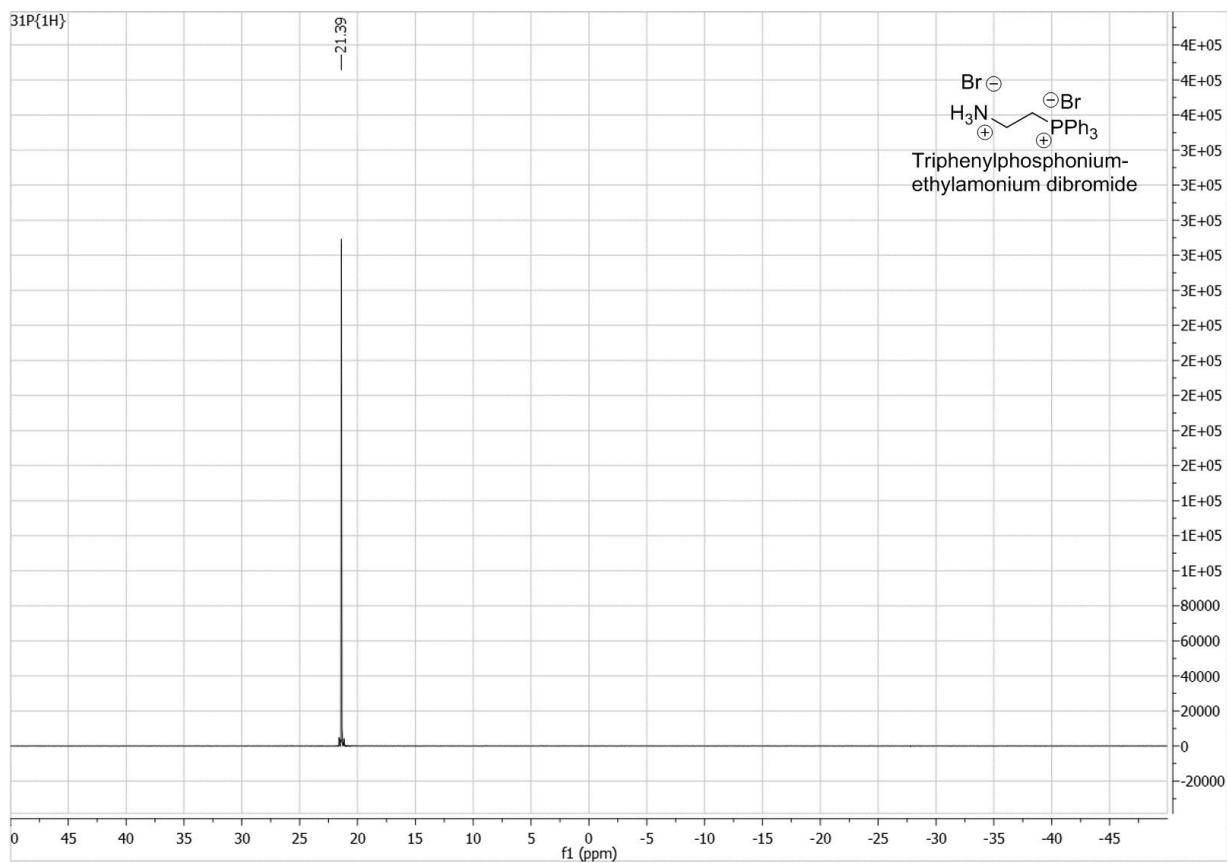

Figure S2:  $^{31}\text{P}$  NMR of 2-(Diphenylphosphino)ethylamine-dibromide ( $\text{CDCl}_3$ , 202 MHz, 300K)

## BODIPY 3

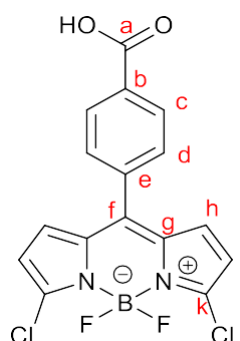

0.5 g (1.27 mmol) of BODIPY 2 were placed into a 100 mL round-bottom flask and dissolved in THF (20 mL). 20 mL of 3M HCl were added and the mixture refluxed for 60h. Upon completion of the reaction the solvents were removed under reduced pressure, and the crude product was purified by column chromatography on silica gel column (eluent: DCM → DCM/MeOH 95: 5). The resulting product was dissolved in a minimal amount of DCM and crushed out with Pentane to obtain 0.2603 g of the target compound as a dark red solid (0.686 mmol, yield = 54%).

$^1\text{H}$  NMR (500 MHz, DMSO- $\text{D}_6$ )  $\delta$  (ppm) = 6.80 (d,  $^3J = 4.6$  Hz, 2H,  $\text{H}_i$ ), 7.08 (d,  $^3J = 4.4$  Hz, 2H,  $\text{H}_h$ ), 7.76 (dt,  $^3J = 8.5$  Hz,  $^4J = 3.5$  Hz, 2H,  $\text{H}_d$ ), 8.12 (dt,  $^3J = 8.5$  Hz,  $^4J = 3.5$  Hz, 2H,  $\text{H}_c$ ).

$^{13}\text{C}$  NMR (126 MHz, DMSO- $\text{D}_6$ )  $\delta$  (ppm) = 119.7 ( $\text{C}_i$ ), 129.2 (deprotonated form,  $\text{C}_d$ ), 129.4 ( $\text{C}_d$ ), 130.5 (deprotonated form,  $\text{C}_c$ ), 131.0 ( $\text{C}_c$ ), 132.8 ( $\text{C}_h$ ), 133.0 ( $\text{C}_g$ ), 133.1 ( $\text{C}_f$ ), 135.4 ( $\text{C}_b$ ), 143.1 ( $\text{C}_e$ ), 143.9 ( $\text{C}_k$ ), 166.7 ( $\text{C}_a$ ), 167.1 ( $\text{C}_a$ , deprotonated form).

$^{11}\text{B}$  NMR (160 MHz, DMSO- $\text{D}_6$ )  $\delta$  (ppm) = 0.30 (t,  $J_{\text{B-F}} = 28.1$  Hz).

$^{19}\text{F}$  NMR (470 MHz, DMSO- $\text{D}_6$ )  $\delta$  (ppm) = -145.75 (dd,  $J_{\text{F-F}} = 56.3$ ,  $J_{\text{F-B}} = 28.0$  Hz).

HR-MS (ESI):  $m/z$  = calculated for  $\text{C}_{16}\text{H}_9\text{B}_1\text{Cl}_2\text{F}_2\text{N}_2\text{O}_2\text{Na}$   $[\text{M}+\text{Na}]^+$  402.99944; found 403.00080.

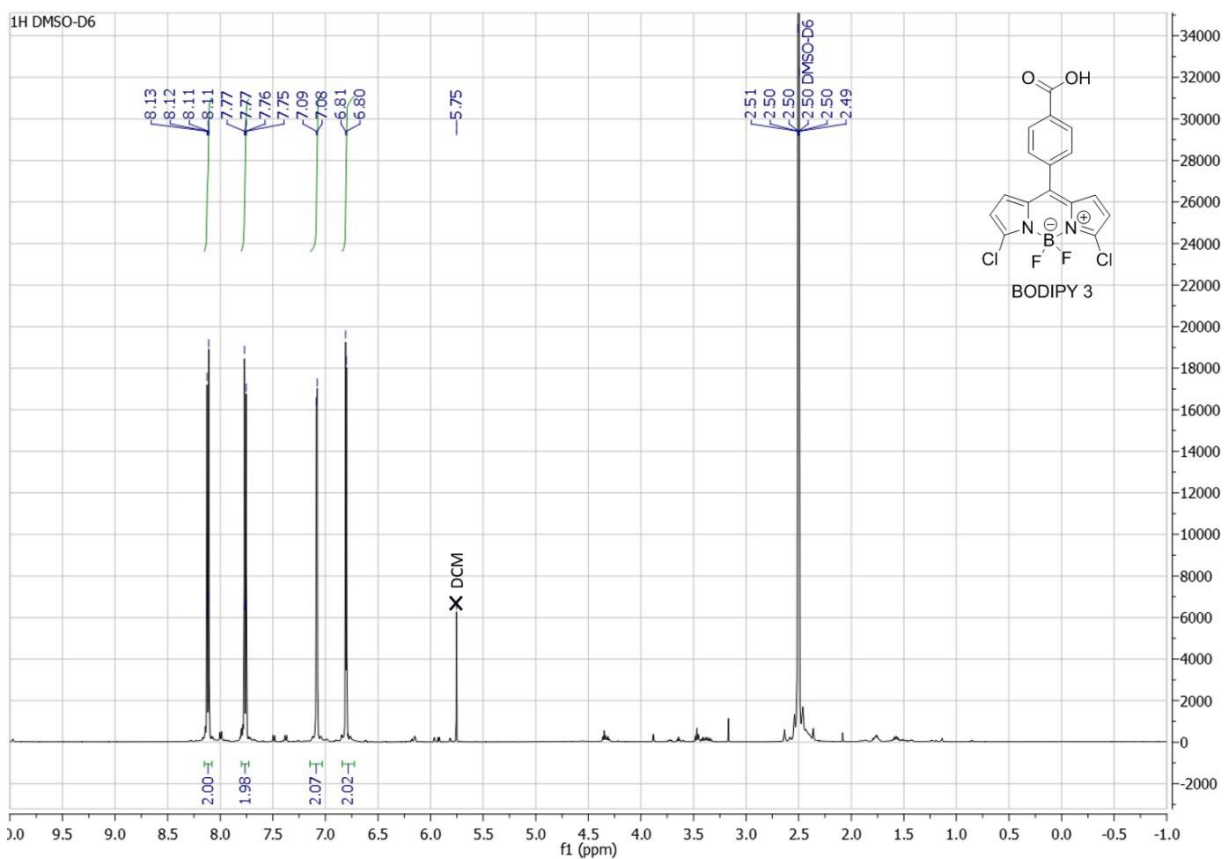

Figure S 3: <sup>1</sup>H NMR of BODIPY 3 (DMSO, 500 MHZ, 300K)

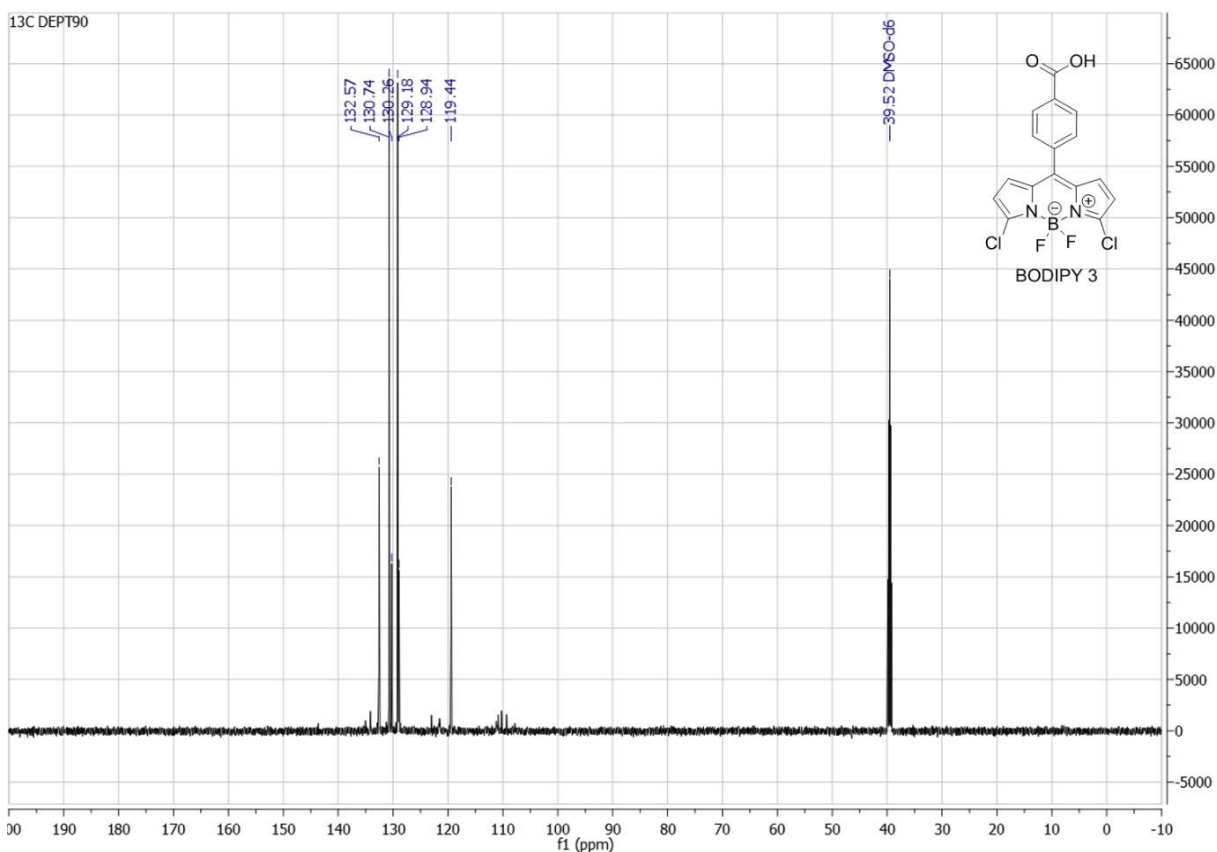

Figure S 4: <sup>13</sup>C NMR (DEPT90) of BODIPY 3 (DMSO, 126 MHZ, 300K)



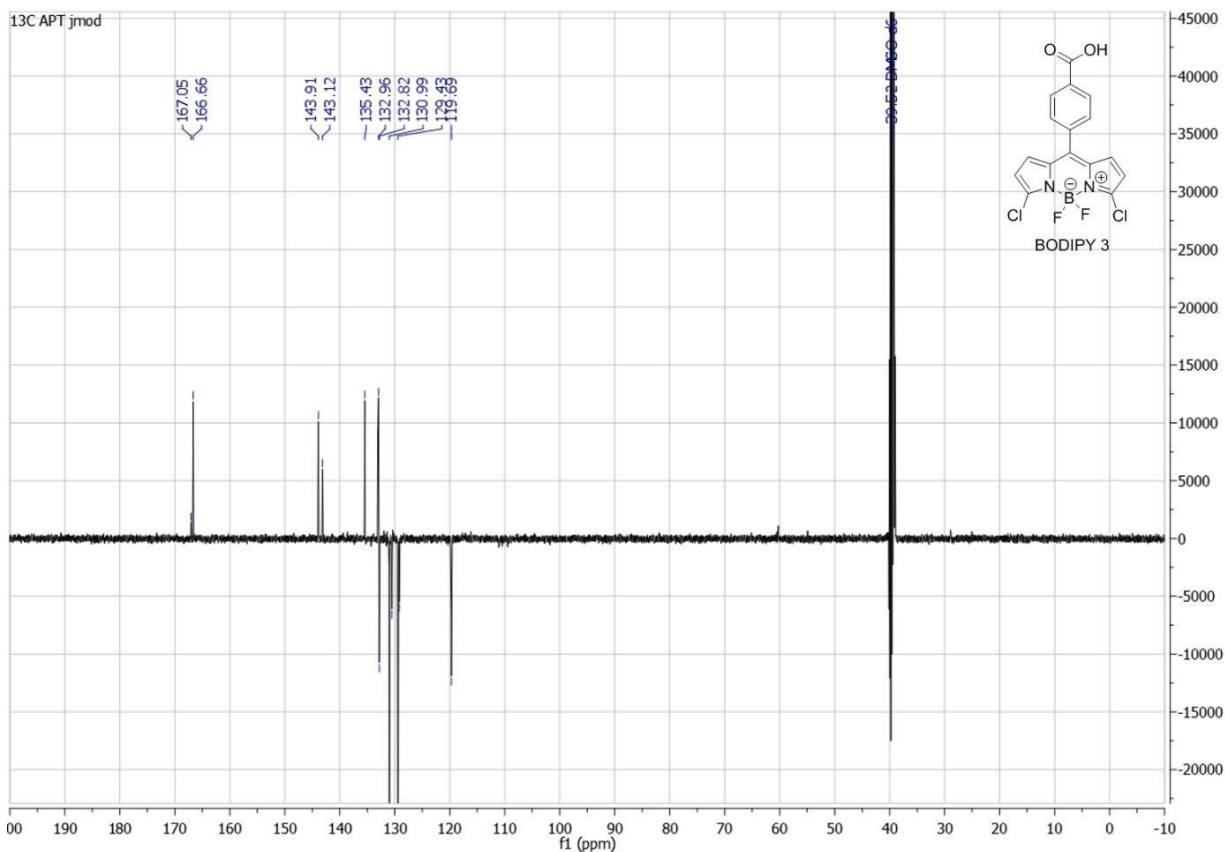

Figure S 5:  $^{13}\text{C}$  NMR (APT jmod) of BODIPY 3 (DMSO, 126 MHz, 300K)

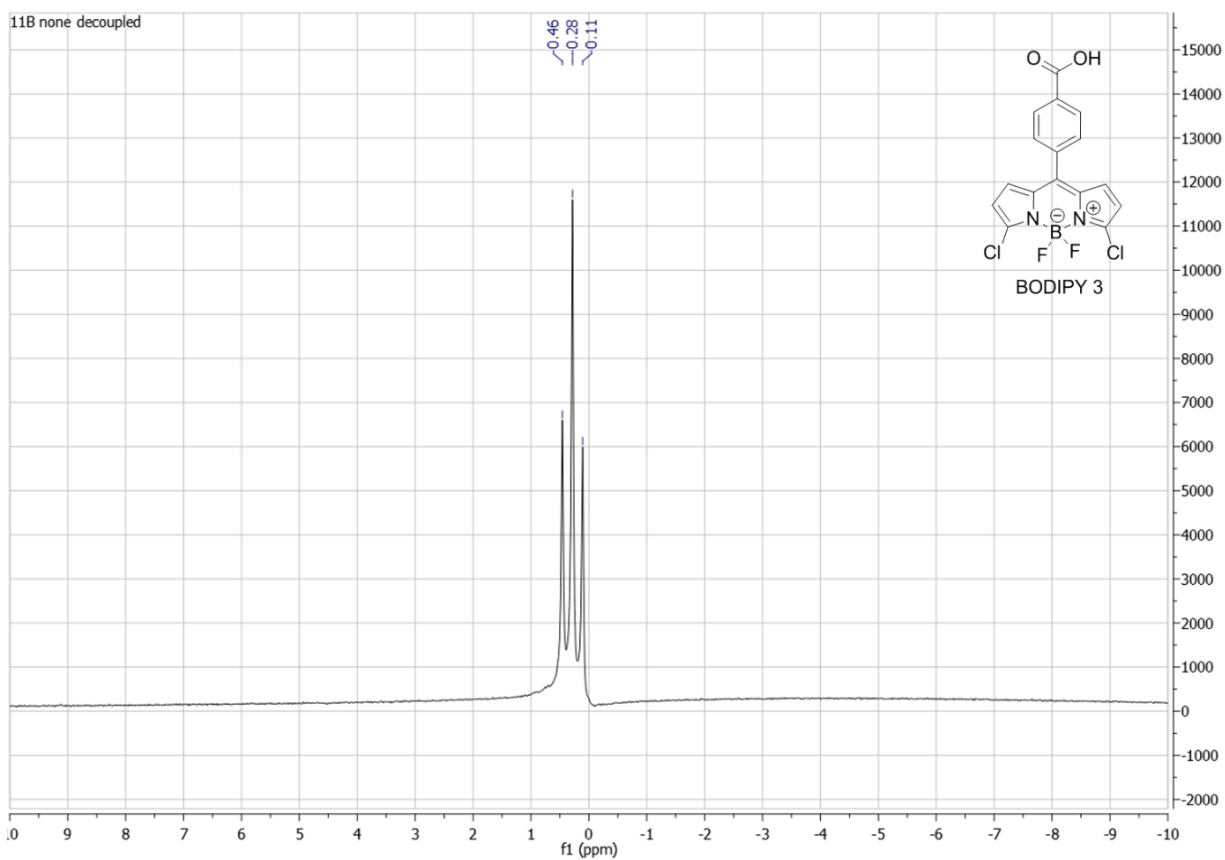

Figure S 6:  $^{11}\text{B}$  NMR of BODIPY 3 (DMSO, 160 MHz, 300K)

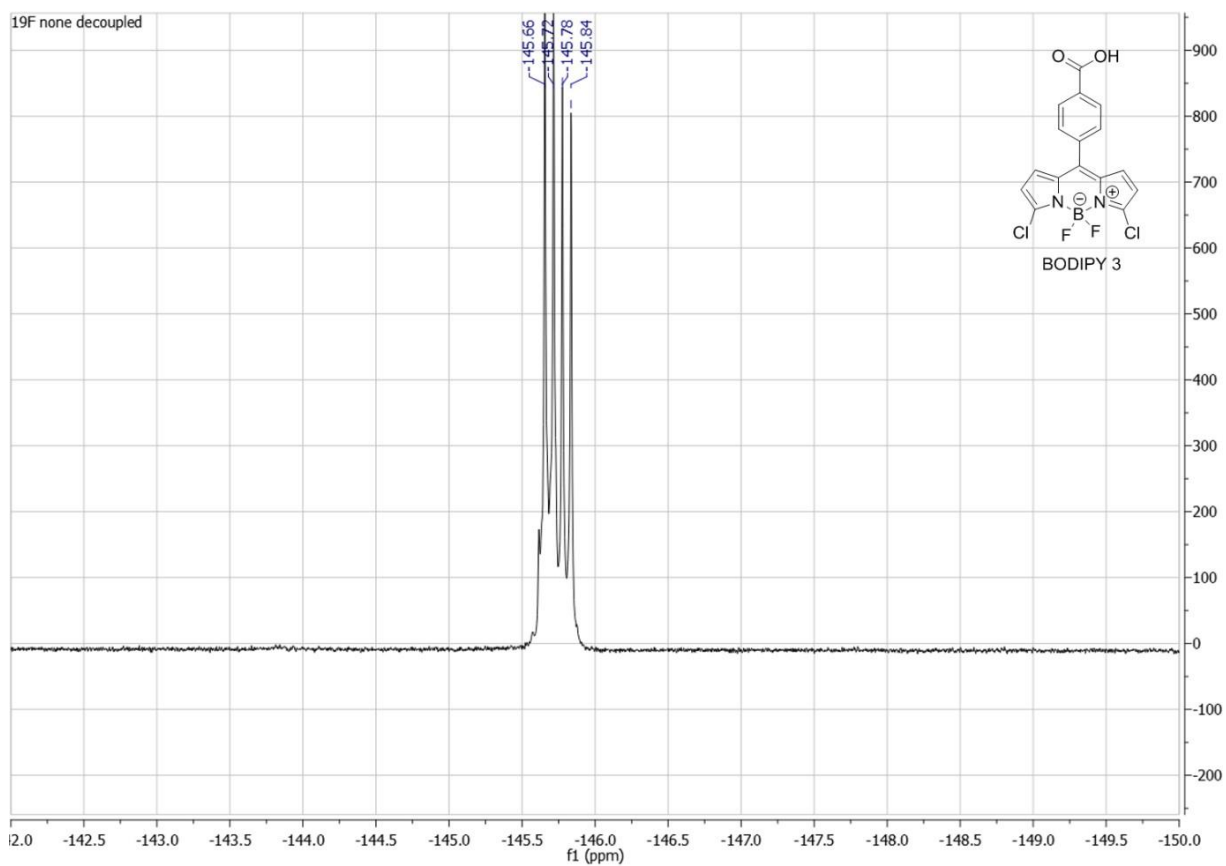

Figure S 7:  $^{19}\text{F}$  NMR of BODIPY 3 (DMSO, 470 MHz, 300K)

## BODIPY 3-acid chloride

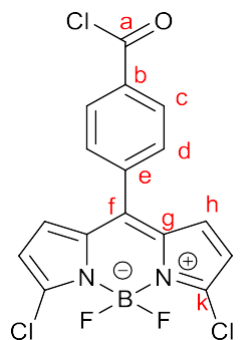

51mg (0.13mmol, 1eq) of BODIPY 3 and 73mg (50.3mmol, 4eq) of  $K_2CO_3$  were placed into a 50 mL round bottom flask and dissolved in 30 mL DCM under argon. 23  $\mu$ L (0.26mmol, 2eq) of oxalyl chloride were added, followed by a droplet of DMF. The reaction was stirred at room temperature for 45min. The solvents were evaporated under reduced pressure to yield the target compound quantitatively as a pink solid. The crude product was directly engaged in the next reaction without any further purification.

$^1H$  NMR (300 MHz,  $CDCl_3$ )  $\delta$  (ppm) = 6.47 (d,  $^3J = 4.4$  Hz, 2H, H<sub>i</sub>), 6.77 (d,  $^3J = 4.1$  Hz, 2H, H<sub>h</sub>), 7.66 (d,  $^3J = 8.6$  Hz, 2H, H<sub>d</sub>), 8.28 (d,  $^3J = 8.6$  Hz, 2H, H<sub>c</sub>).

$^{11}B$  NMR (96 MHz,  $CDCl_3$ )  $\delta$  (ppm) = 0.45 (t,  $J_{B-F} = 27.6$  Hz).

$^{19}F$  NMR (282 MHz,  $CDCl_3$ )  $\delta$  (ppm) = -148.14 (dd,  $J_{F-F} = 55.2$  Hz,  $J_{F-B} = 27.7$  Hz).

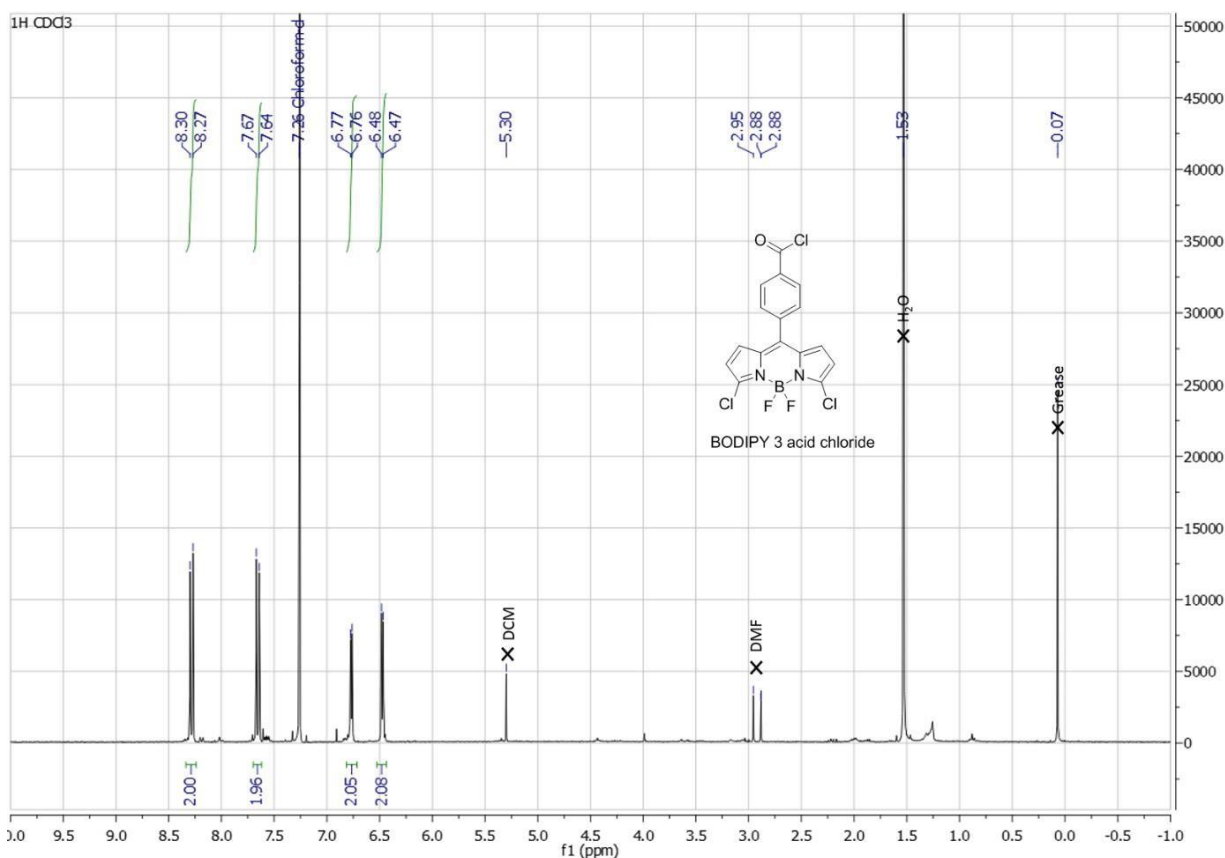

Figure S 8:  $^1H$  NMR of BODIPY 3 acid chloride ( $CDCl_3$ , 300 MHz, 300K)

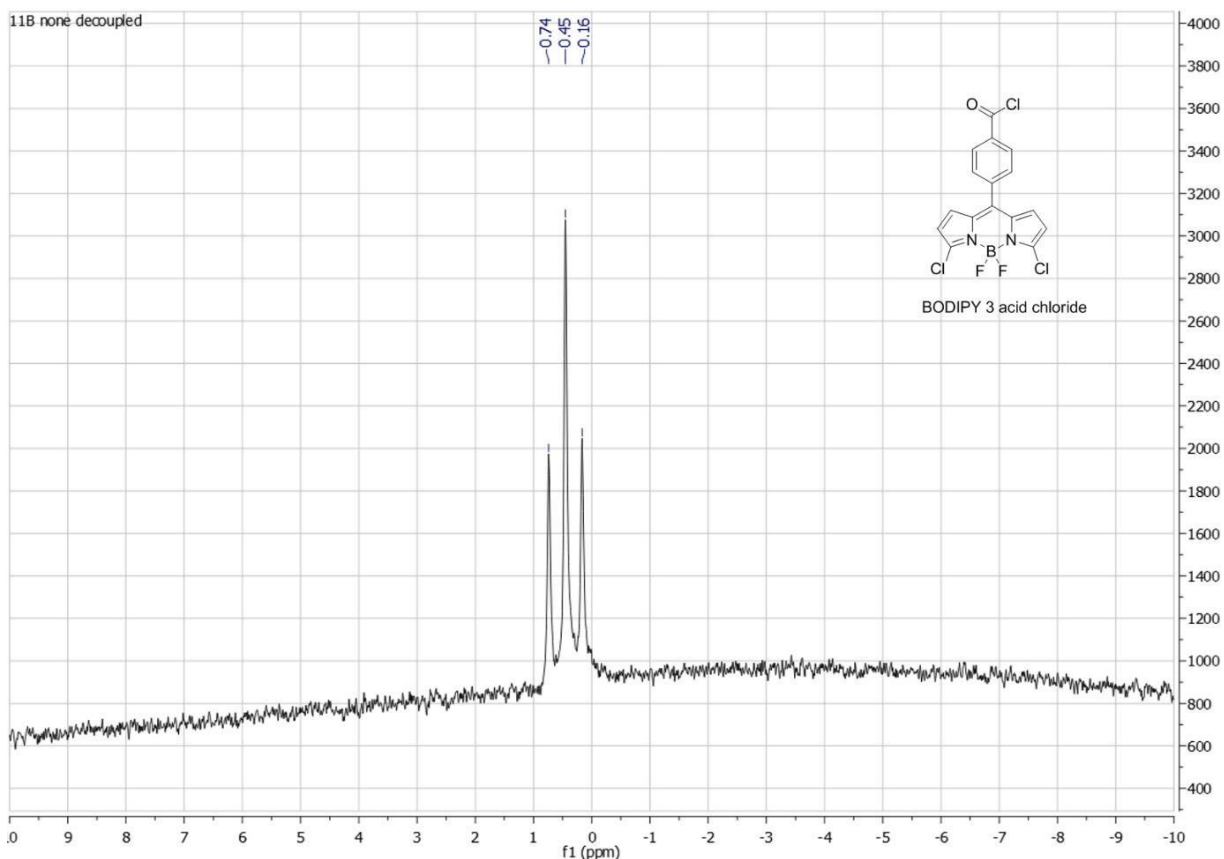

Figure S 9:  $^{11}\text{B}$ -NMR of BODIPY 3 acid chloride ( $\text{CDCl}_3$ , 96 MHz, 300K)

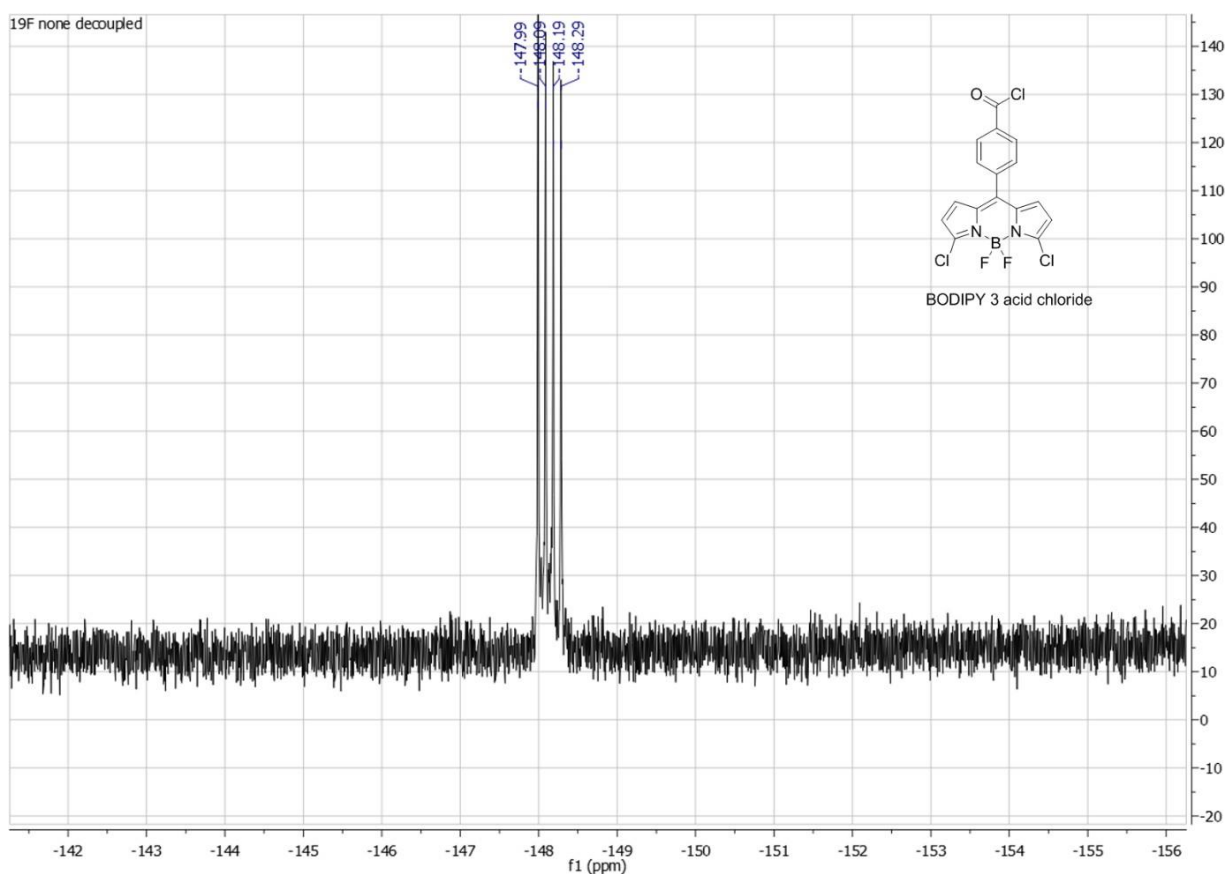

Figure S 10:  $^{19}\text{F}$  NMR of BODIPY 3 acid chloride ( $\text{CDCl}_3$ , 282 MHz, 300K)

## BODIPY 4

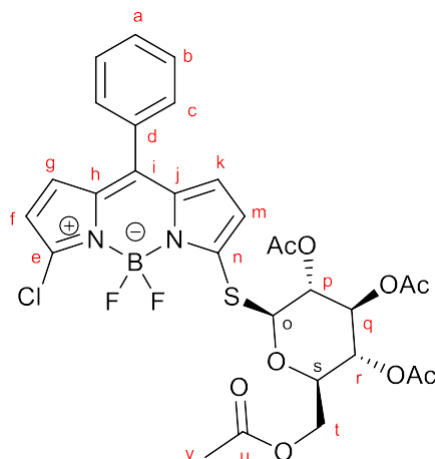

100mg of  $\beta$ -thioglucose-tetraacetate (0.274mmol, 0.95eq) were dissolved in acetone (2mL). 27.4  $\mu$ L of 1M NaOH were added and the resulting solution stirred for 15min at room temperature. In a separate flask 97.5mg (0.289mmol, 1eq) BODIPY 1 and 48mg  $\text{NaHCO}_3$  (0.578mmol, 2eq) were dissolved in acetone (10 mL). The thioglucose-tetraacetate solution was added over the course of 1h30 at room temperature, followed by stirring for another 90min at room temperature. The solvents were then evaporated and the crude product was purified by column chromatography on silica gel, using  $\text{CH}_2\text{Cl}_2$  to  $\text{CH}_2\text{Cl}_2/\text{MeOH}$  99:1 as eluent. Product fractions were evaporated to dryness. The resulting product was dissolved in a minimal amount of DCM and crushed out with Pentane to obtain 80.9mg (0.121 mmol, yield = 44%) of pure BODIPY 4 as a bright pink powder.

$^1\text{H}$  NMR (500 MHz, DMSO- $\text{D}_6$ )  $\delta$  (ppm)= 1.99, 2.01, 2.02, 2.05 (4x s, 4x 3H,  $\text{H}_v$ ), 4.08 (dd,  $J$  = 12.3, 2.0 Hz, 1H,  $\text{H}_t$ ), 4.17 (dd,  $J$  = 12.4, 5.9 Hz, 1H,  $\text{H}_i$ ), 4.30 (ddd,  $J$  = 10.0, 5.8, 2.2 Hz, 1H,  $\text{H}_s$ ), 5.07 (t,  $J$  = 9.8 Hz, 1H,  $\text{H}_p$ ), 5.15 (t,  $J$  = 9.7 Hz, 1H,  $\text{H}_r$ ), 5.47 (t,  $J$  = 9.4 Hz, 1H,  $\text{H}_q$ ), 5.83 (d,  $J$  = 10.1 Hz, 1H,  $\text{H}_o$ ), 6.63 (d,  $J$  = 4.2 Hz, 1H,  $\text{H}_m$ ), 6.83 (d,  $J$  = 4.1 Hz, 1H,  $\text{H}_k$ ), 6.94 (d,  $J$  = 4.6 Hz, 1H,  $\text{H}_f$ ), 7.16 (d,  $J$  = 4.5 Hz, 1H,  $\text{H}_g$ ), 7.63 - 7.57 (m, 4H,  $\text{H}_b$ ,  $\text{H}_c$ ), 7.66 (m, 1H,  $\text{H}_a$ ).

$^{13}\text{C}$  NMR (126 MHz, DMSO- $\text{D}_6$ )  $\delta$  (ppm) = 20.2 ( $\text{C}_v$ ), 20.2 ( $\text{C}_v$ ), 20.3 ( $\text{C}_v$ ), 20.5 ( $\text{C}_v$ ), 61.8 ( $\text{C}_t$ ), 67.8 ( $\text{C}_r$ ), 69.2 ( $\text{C}_q$ ), 72.6 ( $\text{C}_p$ ), 74.8 ( $\text{C}_s$ ), 80.8 ( $\text{C}_o$ ), 117.3 ( $\text{C}_f$ ), 120.6 ( $\text{C}_m$ ), 128.7 ( $\text{C}_g$ ), 129.2 ( $\text{C}_k$ ), 130.5 ( $\text{C}_a$ ), 130.8 ( $\text{C}_b$ ), 132.1 ( $\text{C}_h$ ), 132.5 ( $\text{C}_j$ ), 133.2 ( $\text{C}_c$ ), 135.7 ( $\text{C}_i$ ), 138.7 ( $\text{C}_d$ ), 141.1 ( $\text{C}_e$ ), 157.0 ( $\text{C}_n$ ), 169.1 ( $\text{C}_u$ ), 169.3 ( $\text{C}_u$ ), 169.6 ( $\text{C}_u$ ), 170.0 ( $\text{C}_u$ ).

$^{11}\text{B}$  NMR (160 MHz, DMSO- $\text{D}_6$ )  $\delta$  (ppm)= 0.37 (t,  $J$  = 30.3 Hz).

$^{19}\text{F}$  NMR (470 MHz, DMSO- $\text{D}_6$ )  $\delta$  (ppm)= -145.54 (dddd,  $J$  = 95.4, 91.6, 60.5, 30.2 Hz).

HR-MS (ESI):  $m/z$  = calculated for  $\text{C}_{29}\text{H}_{28}\text{B}_1\text{Cl}_1\text{F}_2\text{N}_2\text{O}_9\text{S}_1\text{Na}_1$  [ $\text{M} + \text{Na}$ ] $^+$  687.11574; found 687.11699.

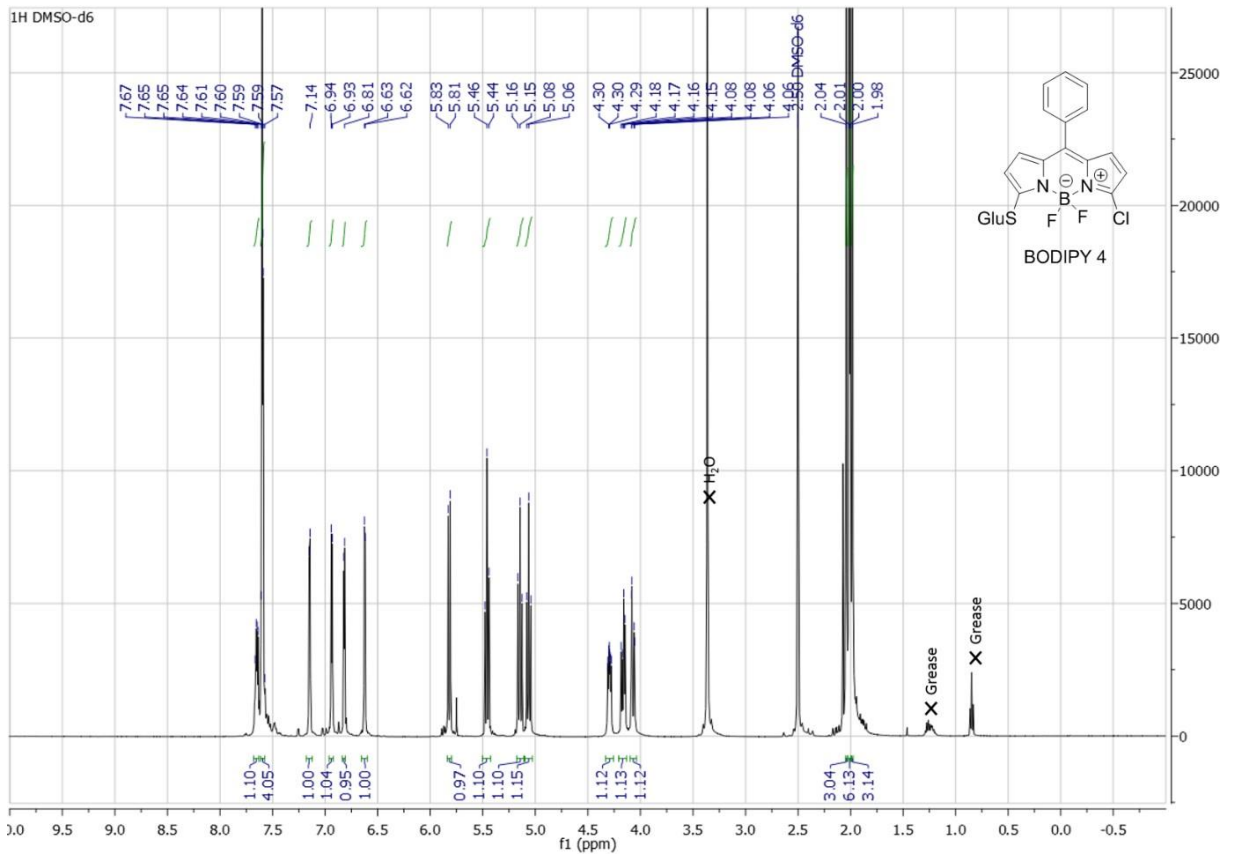

Figure S 11: <sup>1</sup>H NMR of BODIPY 4 (DMSO, 500 MHz, 300K)

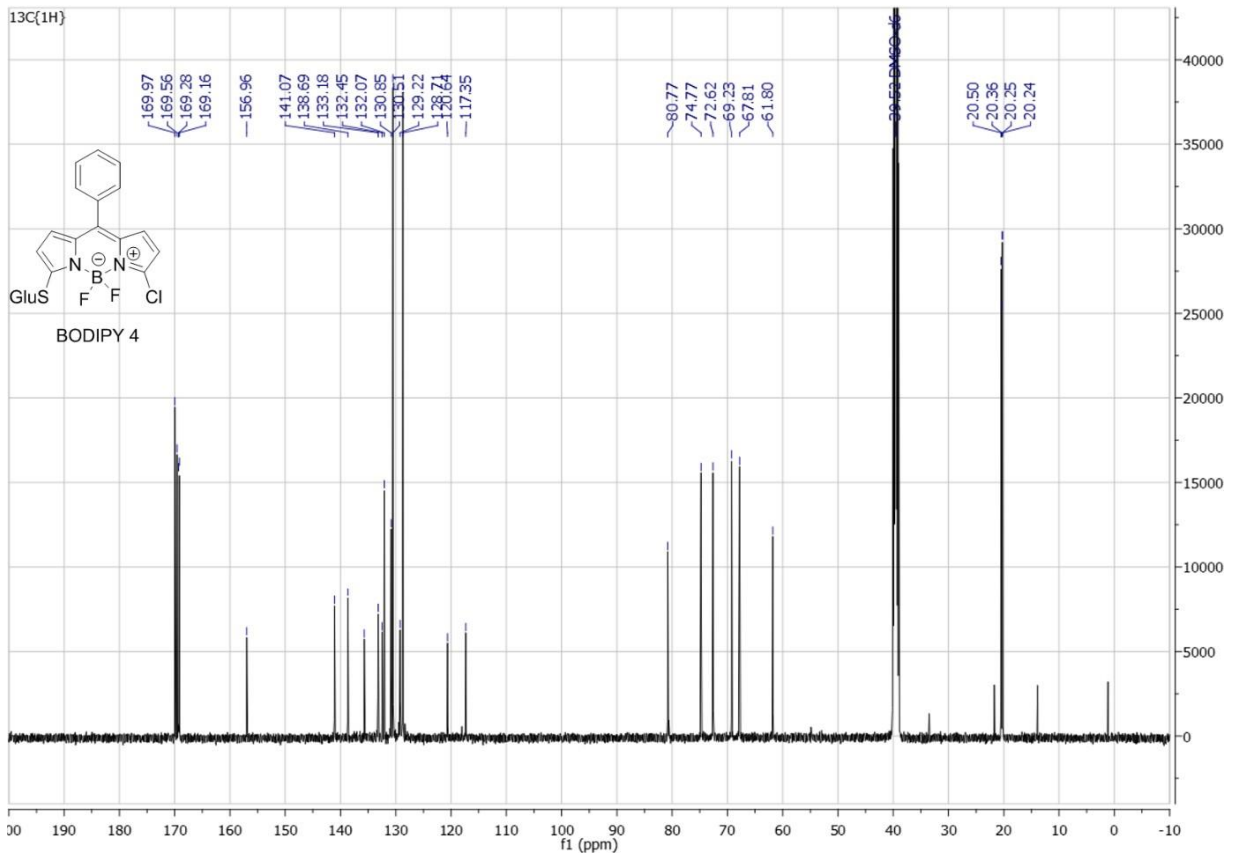

Figure S 12: <sup>13</sup>C NMR of BODIPY 4 (DMSO, 126 MHz, 300K)

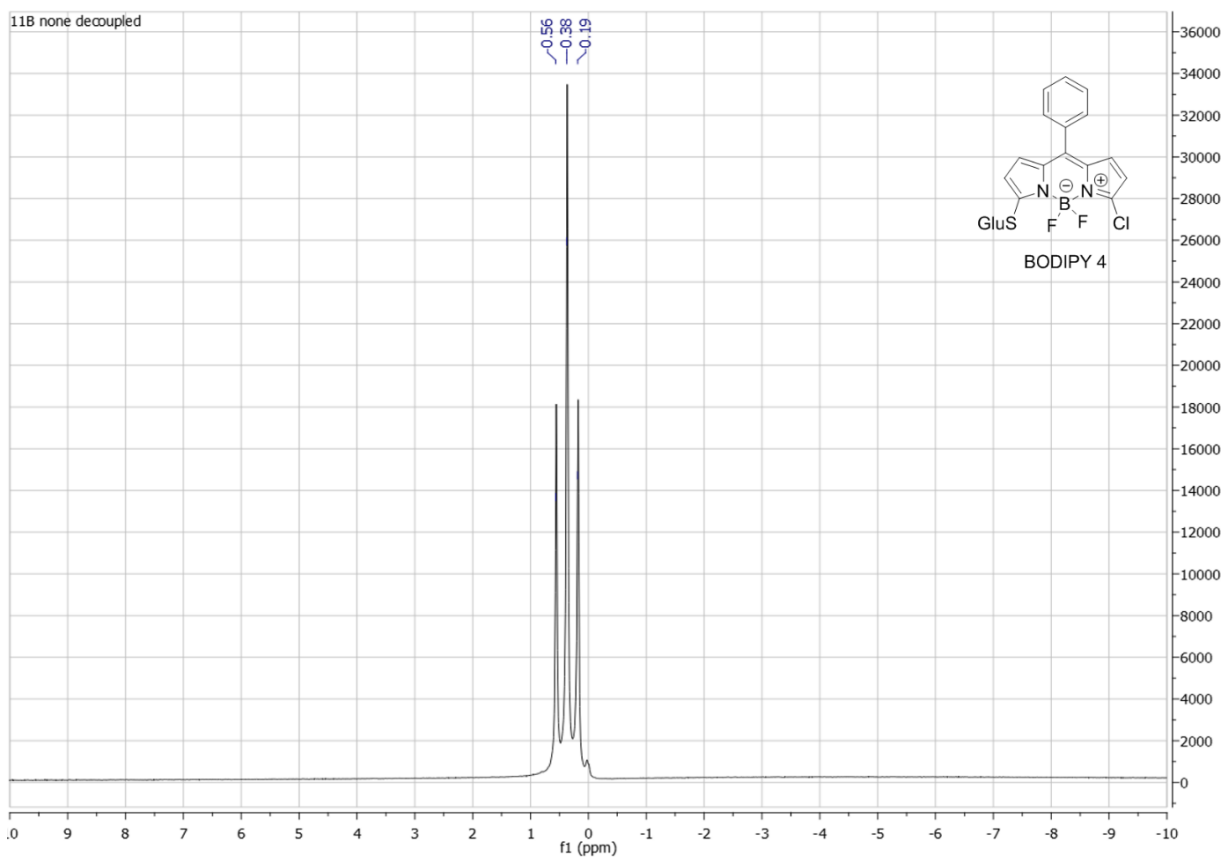

Figure S 13:  $^{11}\text{B}$  NMR of BODIPY 4 (DMSO, 160 MHz, 300K)

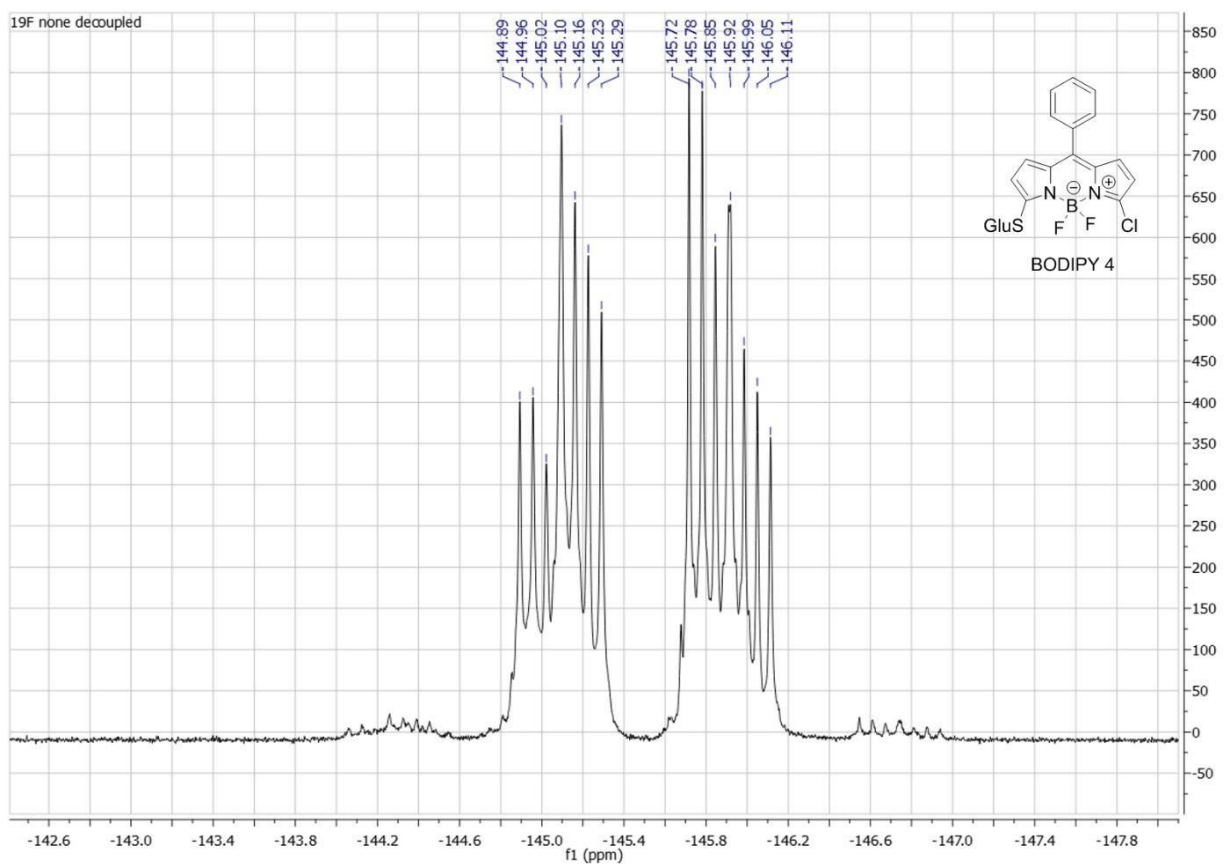

Figure S 14:  $^{19}\text{F}$  NMR of BODIPY 4 (DMSO, 470 MHz, 300K)

## BODIPY 5

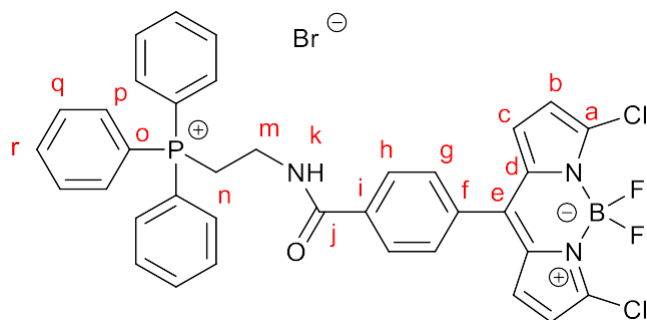

100mg (0.262mmol, 1eq) of BODIPY **3** were dissolved in 15 mL CH<sub>2</sub>Cl<sub>2</sub>. 45  $\mu$ L (0.525mmol, 2eq) oxalyl chloride and a droplet of DMF were added (vigorous development of gas) and the solution stirred for 1h at room temperature. Solvents were then evaporated and the solid redissolved in 20 mL acetonitrile. 110mg (1.31mmol, 5eq) of NaHCO<sub>3</sub> and 122.6mg (0.262mmol, 1eq) of triphenylphosphonium-ethylammonium dibromide were added and the resulting mixture was refluxed for 1h. Upon completion of the reaction, the crude product was purified by column chromatography on silica gel, using CH<sub>2</sub>Cl<sub>2</sub>/MeOH (95:5) as eluent. The resulting product was dissolved in a minimal amount of DCM and crushed out with Pentane to yield pure BODIPY **5** (110mg, 0.147mmol, yield = 56%) as a pink powder.

<sup>1</sup>H NMR (500 MHz, DMSO-D<sub>6</sub>)  $\delta$  (ppm) = 3.70–3.60 (m, 2H, H<sub>n</sub>), 3.95–3.86 (m, 2H, H<sub>m</sub>), 6.83 (d,  $J$  = 4.4 Hz, 2H, H<sub>b</sub>), 7.03 (d,  $J$  = 4.4 Hz, 2H, H<sub>h</sub>), 7.81–7.73 (m, 8H, H<sub>g</sub>, H<sub>p</sub>), 7.95–7.86 (m, 11H, H<sub>h</sub>, H<sub>q</sub>, H<sub>r</sub>), 9.12 (s, 1H, H<sub>k</sub>).

<sup>13</sup>C NMR (126 MHz, DMSO-D<sub>6</sub>)  $\delta$  (ppm) = 20.8 (d,  $J$  = 49.6 Hz, C<sub>m</sub>), 33.4 (d,  $J$  = 12.6 Hz, C<sub>n</sub>), 118.3 (dd,  $J$  = 86.1, 7.9 Hz, C<sub>o</sub>), 119.7 (s, C<sub>b</sub>), 127.4 (s, C<sub>c</sub>), 130.2 (dd,  $J$  = 12.6, 3.2 Hz, C<sub>r</sub>), 130.8 (s, C<sub>h</sub>), 132.7 (s, C<sub>g</sub>), 133.1 (s, C<sub>i</sub>), 133.7 (d,  $J$  = 10.4 Hz, C<sub>q</sub>), 134.3 (s, C<sub>d</sub>), 135.0 (t,  $J$  = 3.8 Hz, C<sub>p</sub>), 135.6 (s, C<sub>e</sub>), 143.2 (s, C<sub>f</sub>), 143.8 (s, C<sub>a</sub>), 165.5 (s, C<sub>j</sub>).

<sup>11</sup>B NMR (160 MHz, DMSO-D<sub>6</sub>)  $\delta$  (ppm) = 0.30 (t,  $J$  = 28.0 Hz).

<sup>19</sup>F NMR (470 MHz, DMSO-D<sub>6</sub>)  $\delta$  (ppm) = -145.77 (dd,  $J$  = 56.1, 28.0 Hz).

<sup>31</sup>P NMR (202 MHz, DMSO-D<sub>6</sub>)  $\delta$  (ppm) = 21.33 (s).

HR-MS (ESI):  $m/z$  = calculated for C<sub>36</sub>H<sub>28</sub>B<sub>1</sub>Cl<sub>2</sub>F<sub>2</sub>N<sub>3</sub>O<sub>1</sub>P<sub>1</sub> [M]<sup>+</sup> 668.14027; found 668.13955.



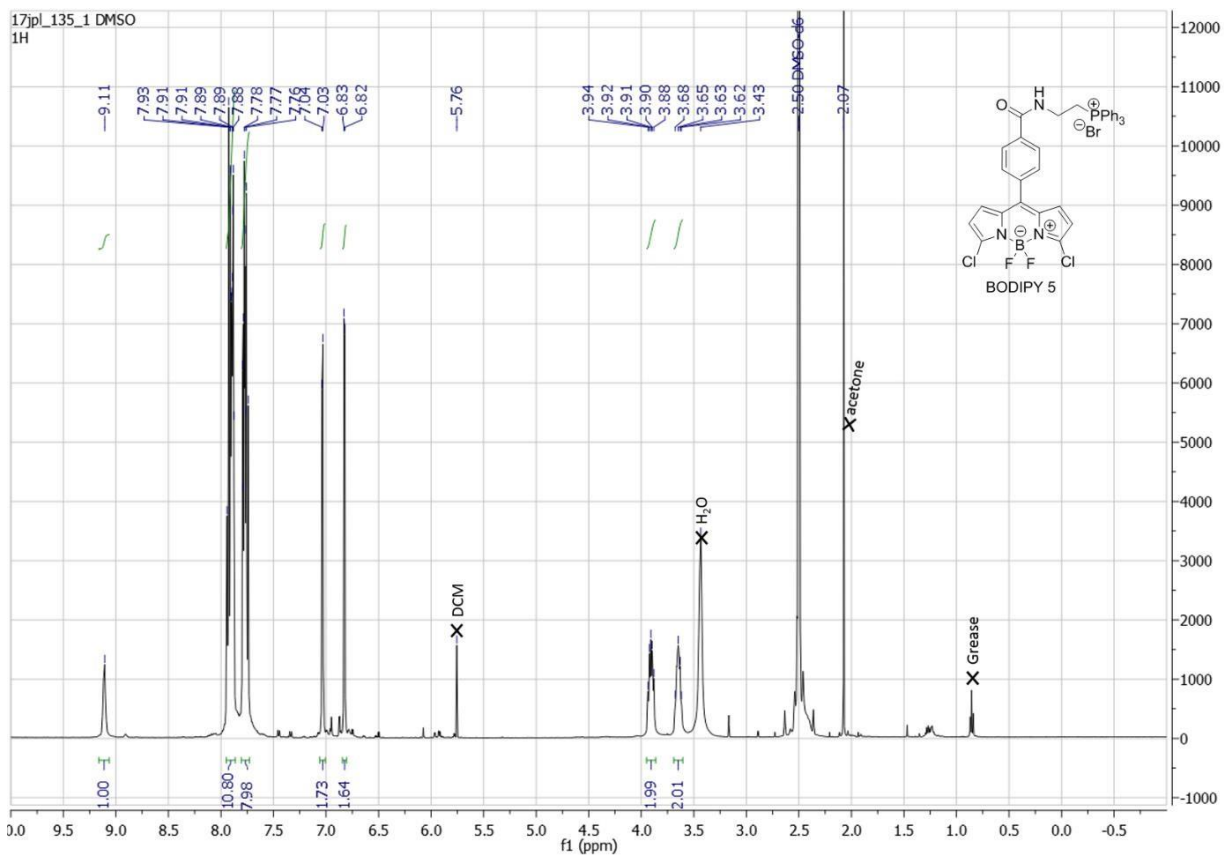

Figure S 15: <sup>1</sup>H NMR of BODIPY 5 (DMSO, 500 MHz, 300K)

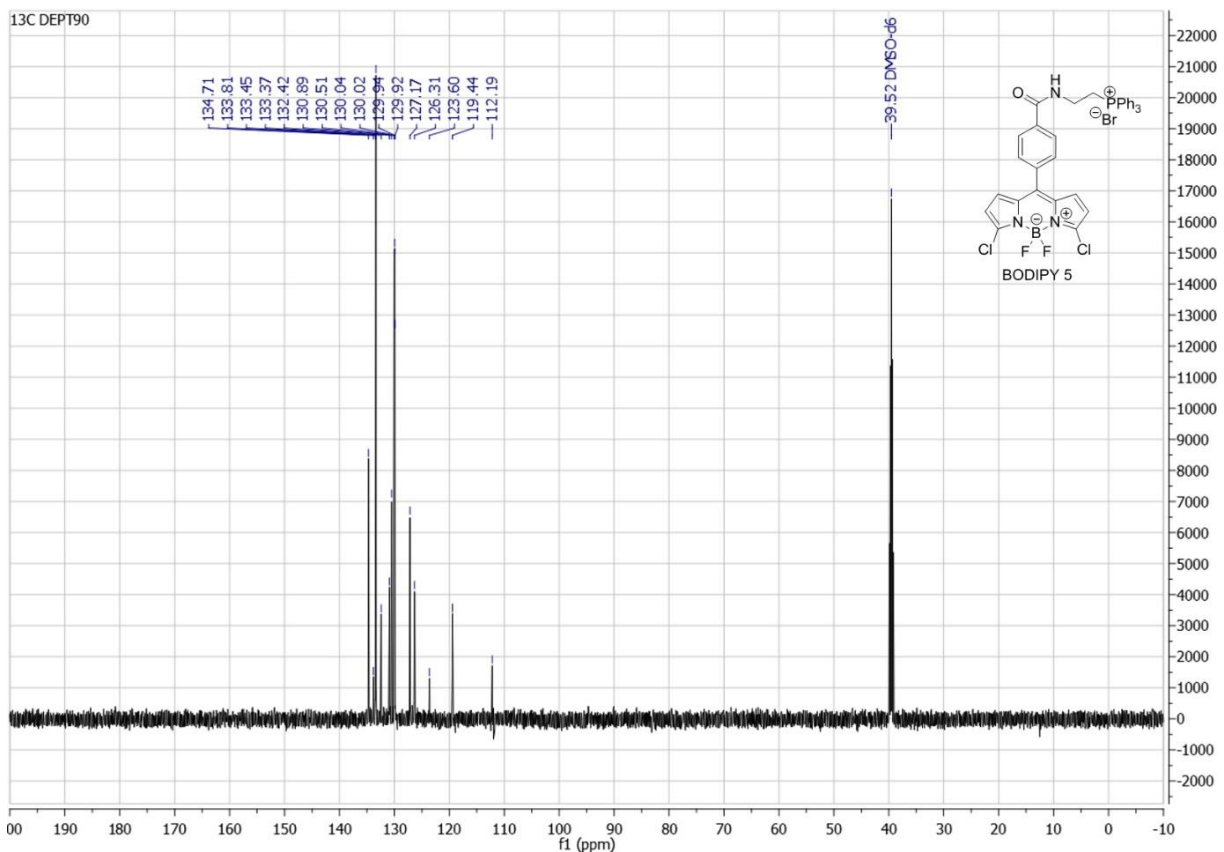

Figure S 16: <sup>13</sup>C NMR (DEPT90) of BODIPY 5 (DMSO, 126 MHz, 300K)

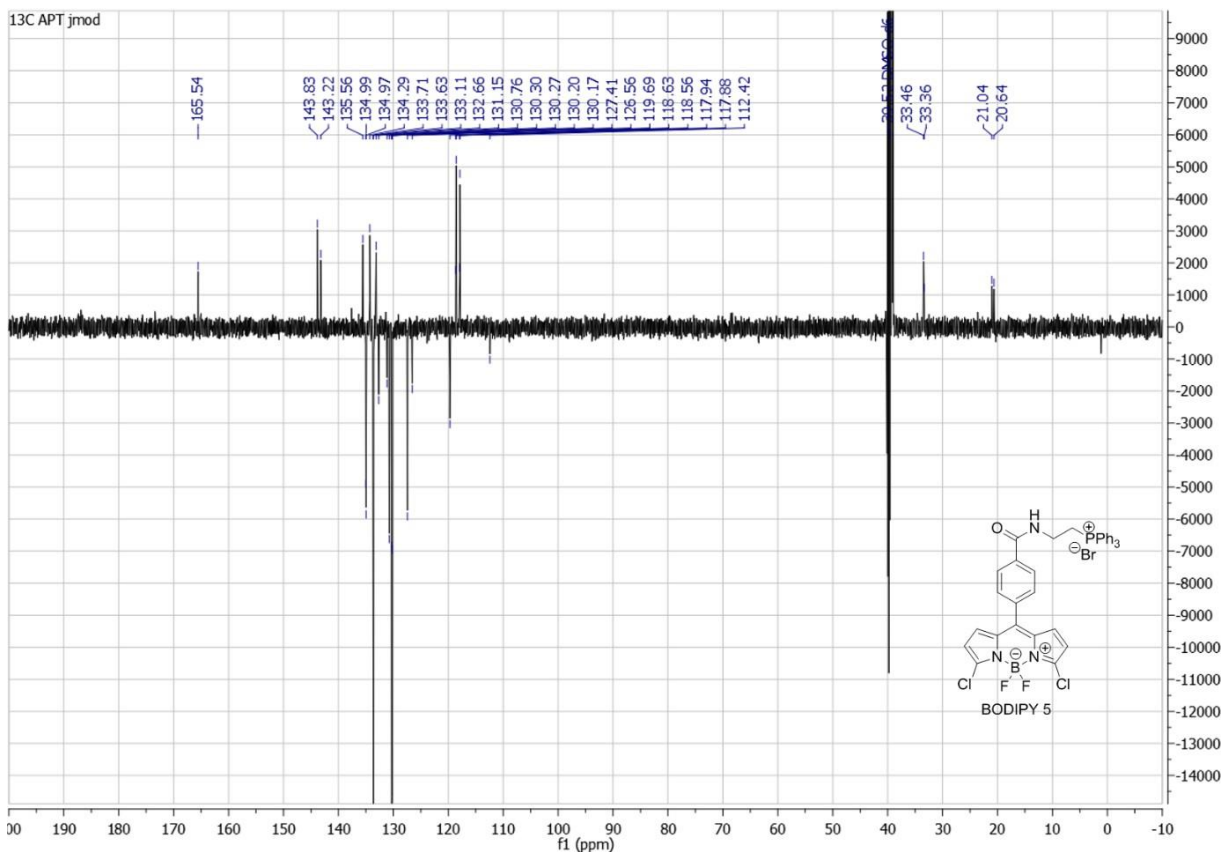

Figure S 17:  $^{13}\text{C}$  NMR (APT jmod) of BODIPY 5 (DMSO, 126 MHz, 300K)

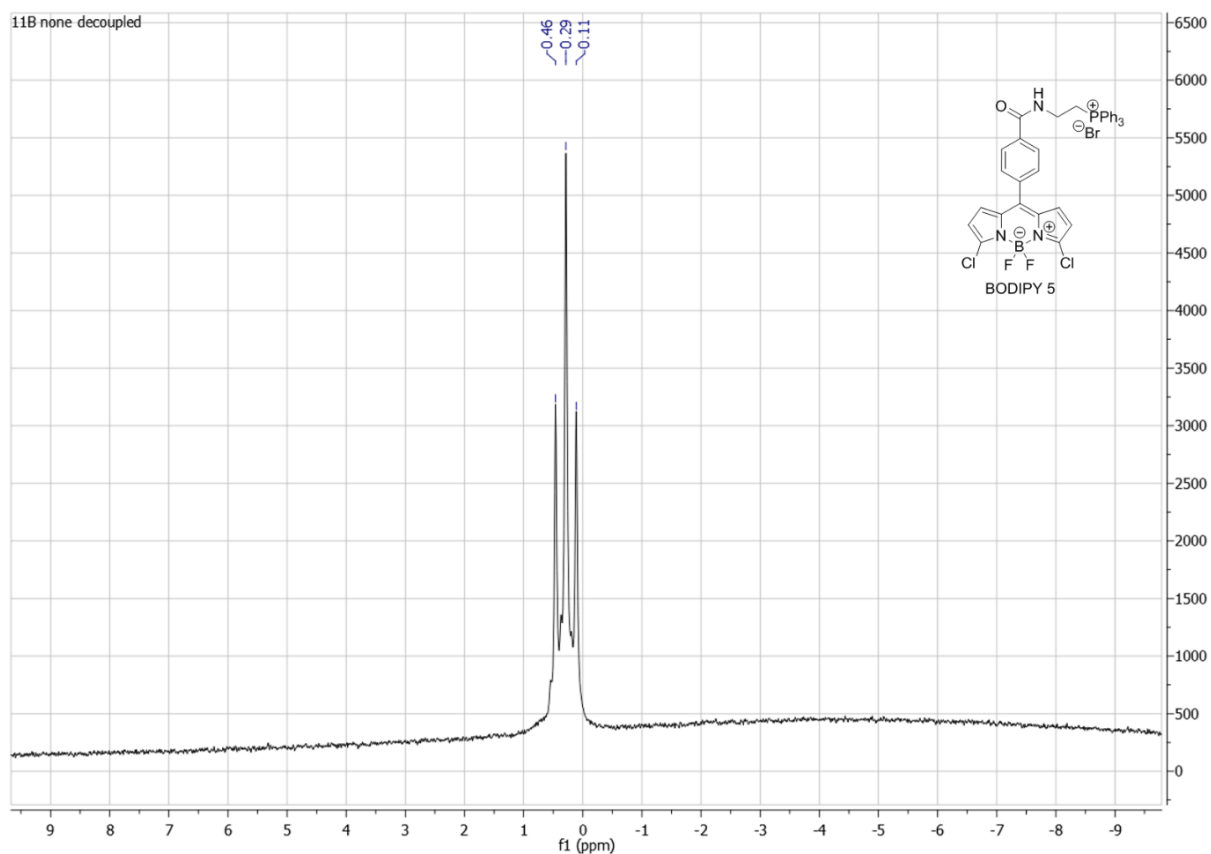

Figure S 18:  $^{11}\text{B}$  NMR of BODIPY 5 (DMSO, 160 MHz, 300K)

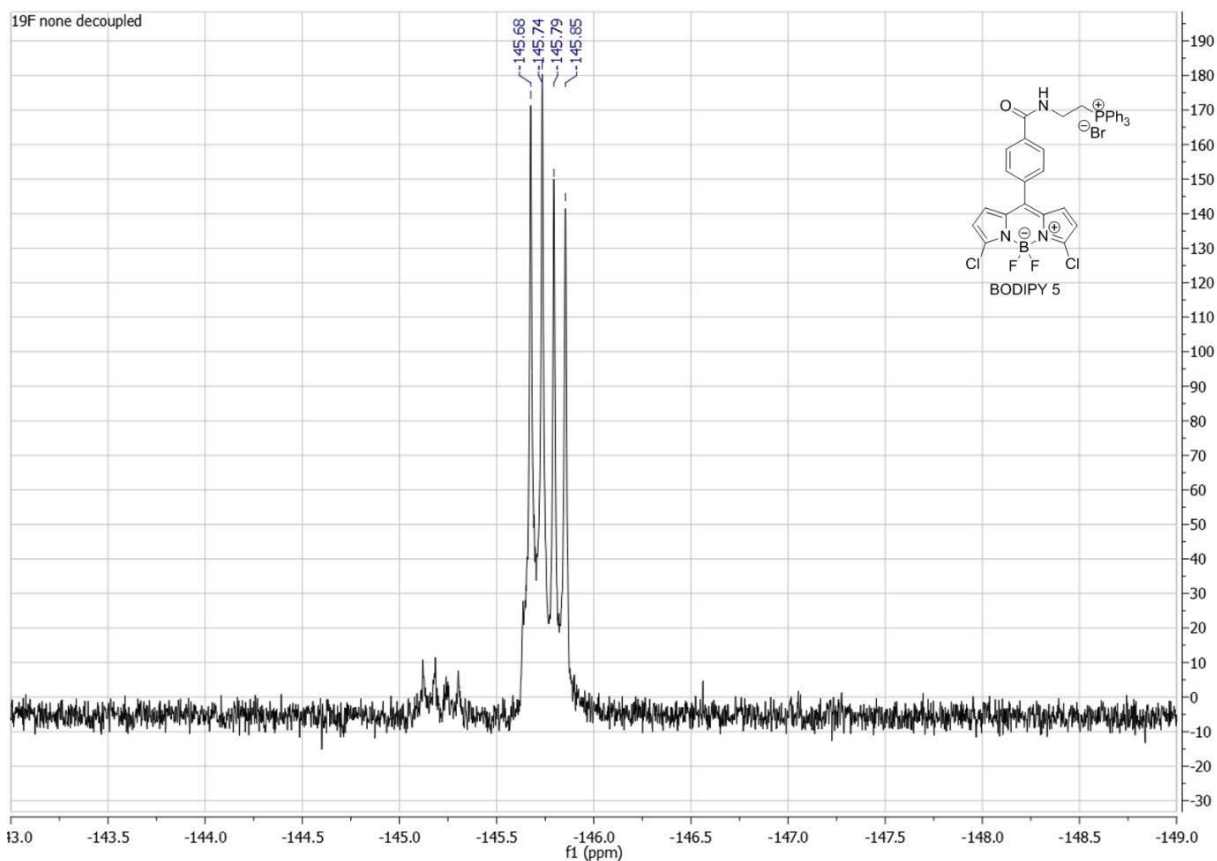

Figure S 19:  $^{19}\text{F}$  NMR of BODIPY 5 (DMSO, 470 MHz, 300K)

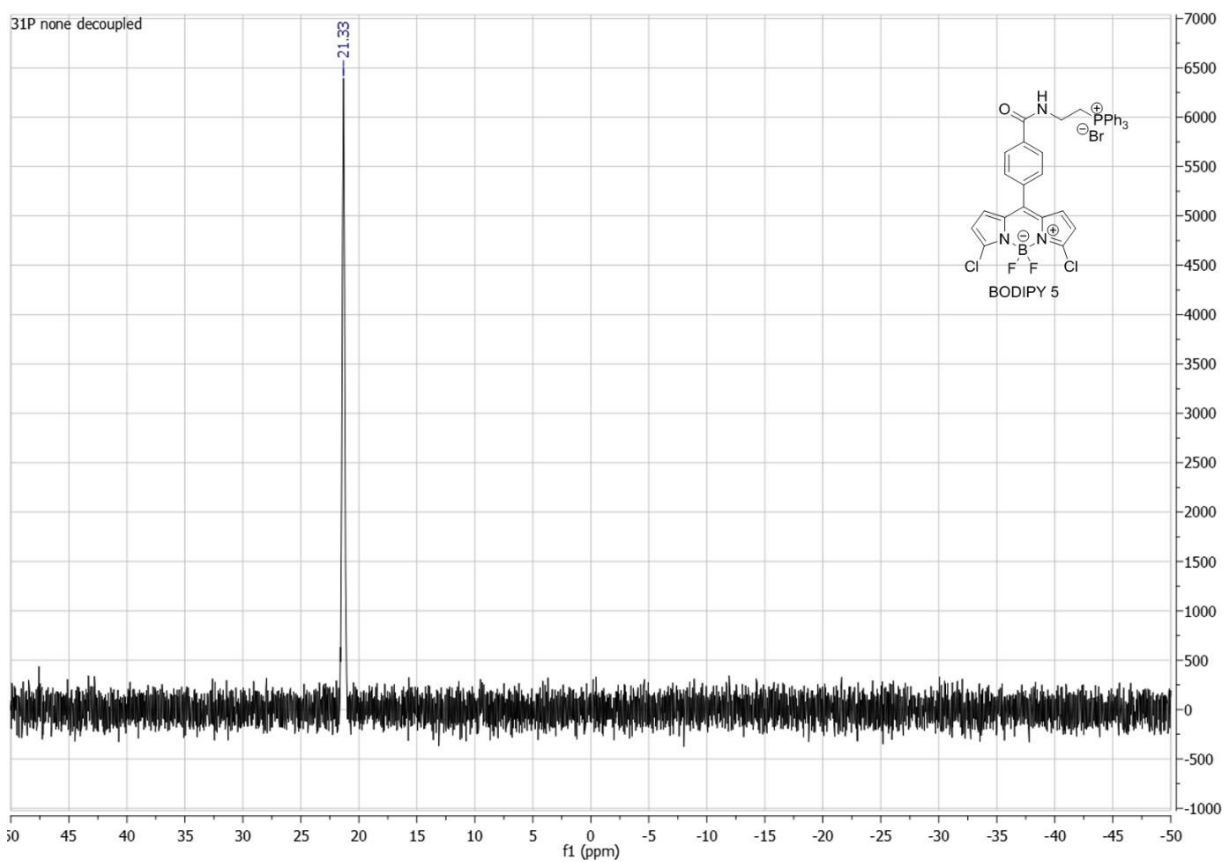

Figure S 20:  $^{31}\text{P}$  NMR of BODIPY 5 (DMSO, 202 MHz, 300K)

## BODIPY 6

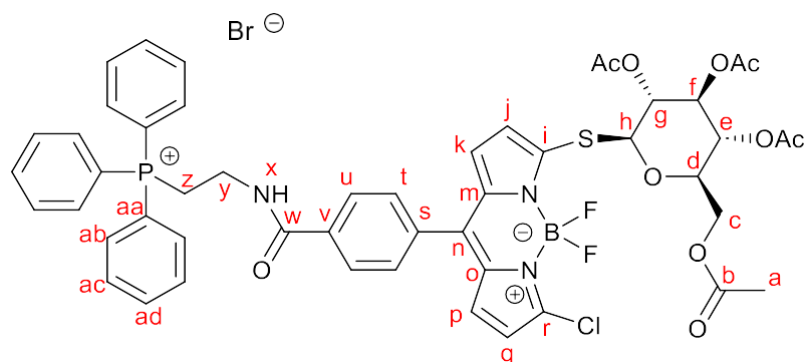

23.1 mg (0.0634 mmol, 0.95 eq) of  $\beta$ -thioglucose-tetraacetate were dissolved in 4 mL of acetone. 63.4  $\mu$ L of 1M NaOH were added, and the resulting mixture was stirred for 15 min at room temperature. 50 mg (0.066 mmol, 1 eq) BODIPY 5 and 17 mg (0.2 mmol, 3 eq)  $\text{NaHCO}_3$  were placed in a roundbottom flask and dissolved in 50 mL acetone. The thioglucose solution was added over the course of 1h30 and stirred for another hour at room temperature. The crude product was purified by column chromatography on silica gel, using  $\text{CH}_2\text{Cl}_2$ : MeOH (98:2  $\rightarrow$  95:5 + 1% formic acid) as eluent. The resulting product was dissolved in a minimal amount of DCM and crushed out with Pentane to obtain 50 mg (44.38  $\mu$ mol, yield = 70%) of the pure BODIPY 6 as a bright pink powder.

$^1\text{H}$  NMR (500 MHz, DMSO- $D_6$ )  $\delta$  (ppm) = 1.98 (s, 3H,  $H_a$ ), 2.01 (d,  $J$  = 4.3 Hz, 6H,  $H_a$ ), 2.04 (s, 3H,  $H_a$ ), 3.66 (t,  $J$  = 15.3 Hz, 2H,  $H_y$ ), 3.93 (dt,  $J$  = 10.4, 4.8 Hz, 2H,  $H_z$ ), 4.07 (dd,  $J$  = 12.3, 2.0 Hz, 1H,  $H_c$ ), 4.16 (dd,  $J$  = 12.4, 5.8 Hz, 1H,  $H_c$ ), 4.30 (ddd,  $J$  = 10.0, 5.7, 2.3 Hz, 1H,  $H_d$ ), 5.06 (t,  $J$  = 9.8 Hz, 1H,  $H_g$ ), 5.15 (t,  $J$  = 9.7 Hz, 1H,  $H_e$ ), 5.46 (t,  $J$  = 9.4 Hz, 1H,  $H_f$ ), 5.83 (d,  $J$  = 10.1 Hz, 1H,  $H_h$ ), 6.66 (d,  $J$  = 4.3 Hz, 1H,  $H_j$ ), 6.81 (d,  $J$  = 4.2 Hz, 1H,  $H_k$ ), 6.97 (d,  $J$  = 4.7 Hz, 1H,  $H_q$ ), 7.13 (d,  $J$  = 4.6 Hz, 1H,  $H_p$ ), 7.70 (d,  $J$  = 8.5 Hz, 2H,  $H_t$ ), 7.77 (td,  $J$  = 8.0, 3.5 Hz, 6H,  $H_{ab}$ ), 7.90 (ddd,  $J$  = 8.4, 7.9, 4.0 Hz, 9H,  $H_{ac}$ ,  $H_{ad}$ ), 7.96 (d,  $J$  = 8.3 Hz, 2H,  $H_u$ ), 9.28 (t,  $J$  = 5.5 Hz, 1H,  $H_x$ )

$^{13}\text{C}$  NMR (126 MHz, DMSO- $D_6$ )  $\delta$  (ppm) = 20.2 (s,  $C_a$ ), 20.3 (s,  $C_a$ ), 20.4 (s,  $C_a$ ), 20.5 (s,  $C_a$ ), 20.9 (d,  $J$  = 48.9 Hz,  $C_y$ ), 33.4 (d,  $J$  = 7.4 Hz,  $C_z$ ), 61.8 (s,  $C_c$ ), 67.8 (s,  $C_e$ ), 69.2 (s,  $C_f$ ), 72.6 (s,  $C_g$ ), 74.8 (s,  $C_d$ ), 80.7 (s,  $C_h$ ), 117.5 (s,  $C_q$ ), 118.3 (dd,  $J$  = 86.0, 5.9 Hz,  $C_{aa}$ ), 121.0 (s,  $C_j$ ), 127.0 (s,  $C_p$ ), 127.4 (s,  $C_k$ ), 130.2 (d,  $J$  = 12.6 Hz,  $C_{ad}$ ), 130.6 (s,  $C_u$ ), 132.3 (s,  $C_v$ ), 133.7 (d,  $J$  = 10.4 Hz,  $C_{ac}$ ), 134.7 (s,  $C_m$ ), 135.0 (d,  $J$  = 2.9 Hz,  $C_{ab}$ ), 135.2 (s,  $C_n$ ), 135.6 (s,  $C_o$ ), 139.0 (s,  $C_r$ ), 139.8 (s,  $C_s$ ), 157.6 (s,  $C_i$ ), 165.6 (s,  $C_w$ ), 169.1 (s,  $C_b$ ), 169.3 (s,  $C_b$ ), 169.6 (s,  $C_b$ ), 170.0 (s,  $C_b$ ).

$^{11}\text{B}$  NMR (160 MHz, DMSO- $D_6$ )  $\delta$  (ppm) = 0.36 (t,  $J$  = 30.2 Hz).

$^{19}\text{F}$  NMR (470 MHz, DMSO- $D_6$ )  $\delta$  (ppm) = -145.51 (dddd,  $J$  = 125.5, 93.1, 78.3, 30.2 Hz).

$^{31}\text{P}$  NMR (202 MHz, DMSO- $D_6$ )  $\delta$  (ppm) = 21.33 (s).

HR-MS (ESI):  $m/z$  = calculated for  $\text{C}_{50}\text{H}_{47}\text{B}_1\text{Cl}_1\text{F}_2\text{N}_3\text{O}_{10}\text{P}_1\text{S}_1$  [M] $^+$  996.24639; found 996.24908.

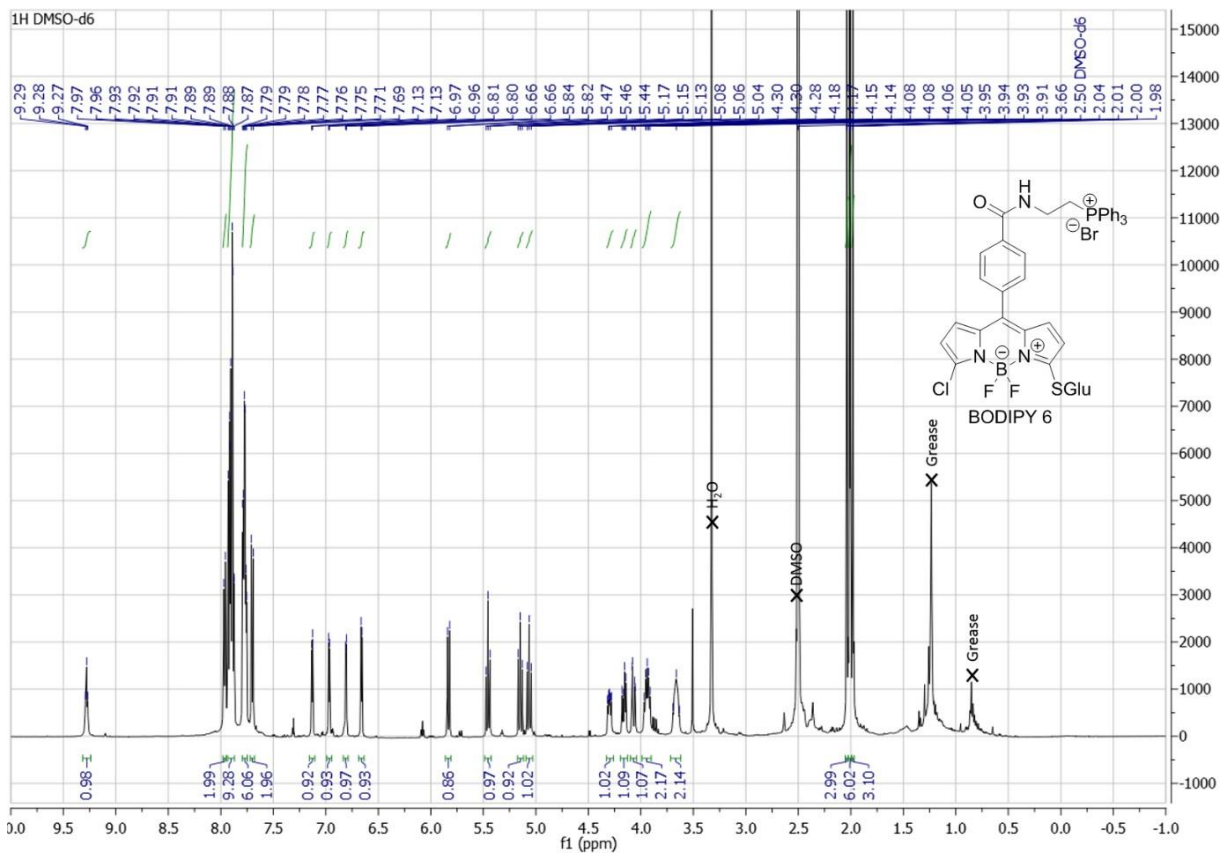

Figure S 21:  $^1\text{H}$  NMR of BODIPY 6 (DMSO, 500 MHz, 300K)

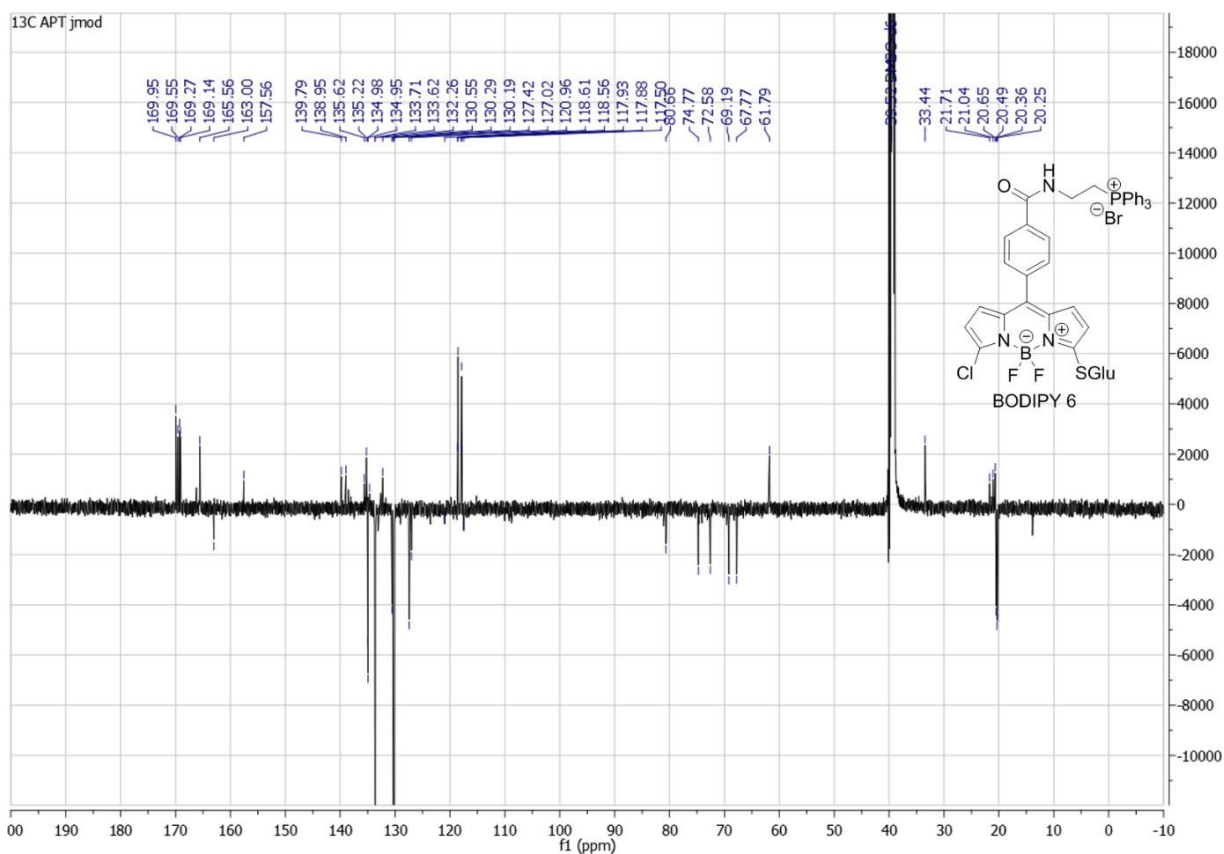

Figure S 22:  $^{13}\text{C}$  NMR (APT jmod) of BODIPY 6 (DMSO, 126 MHz, 300K)

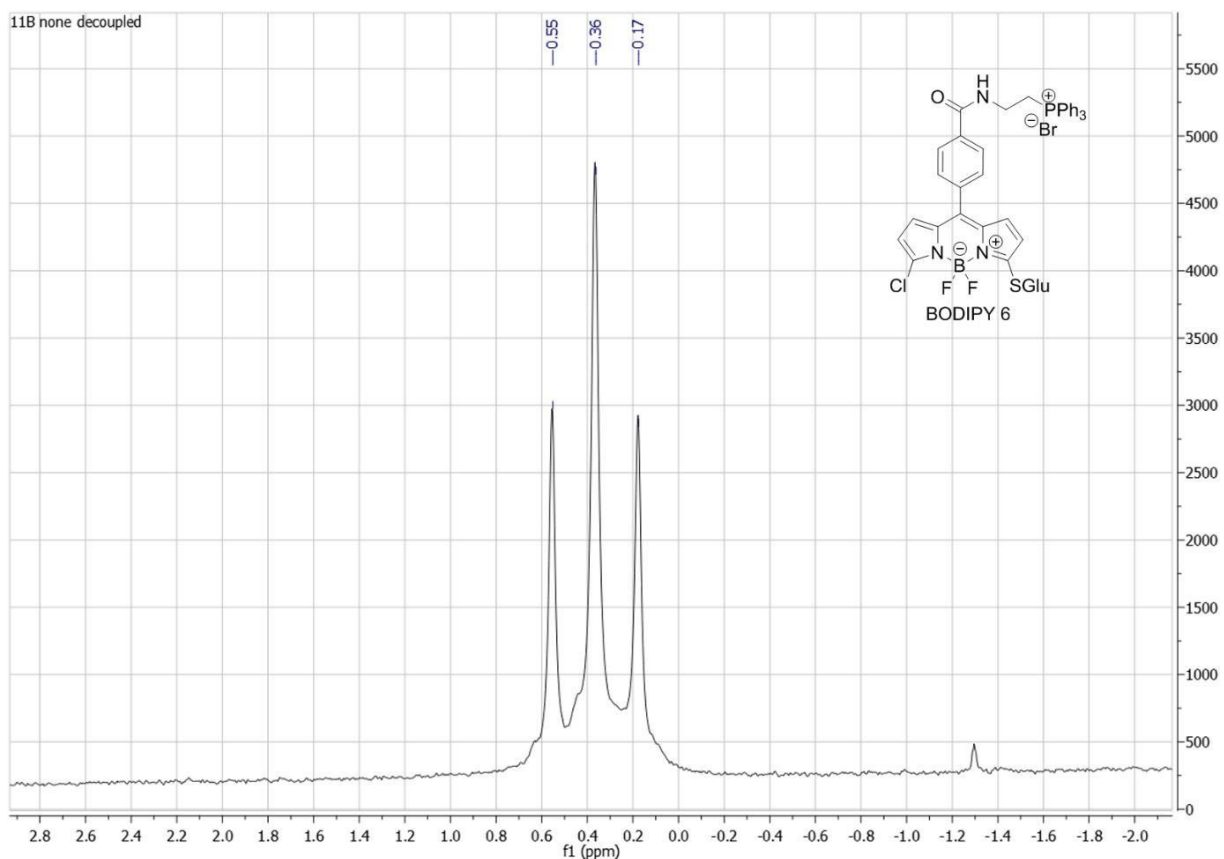

Figure S 23:  $^{11}\text{B}$  NMR of BODIPY 6 (DMSO, 160 MHz, 300K)

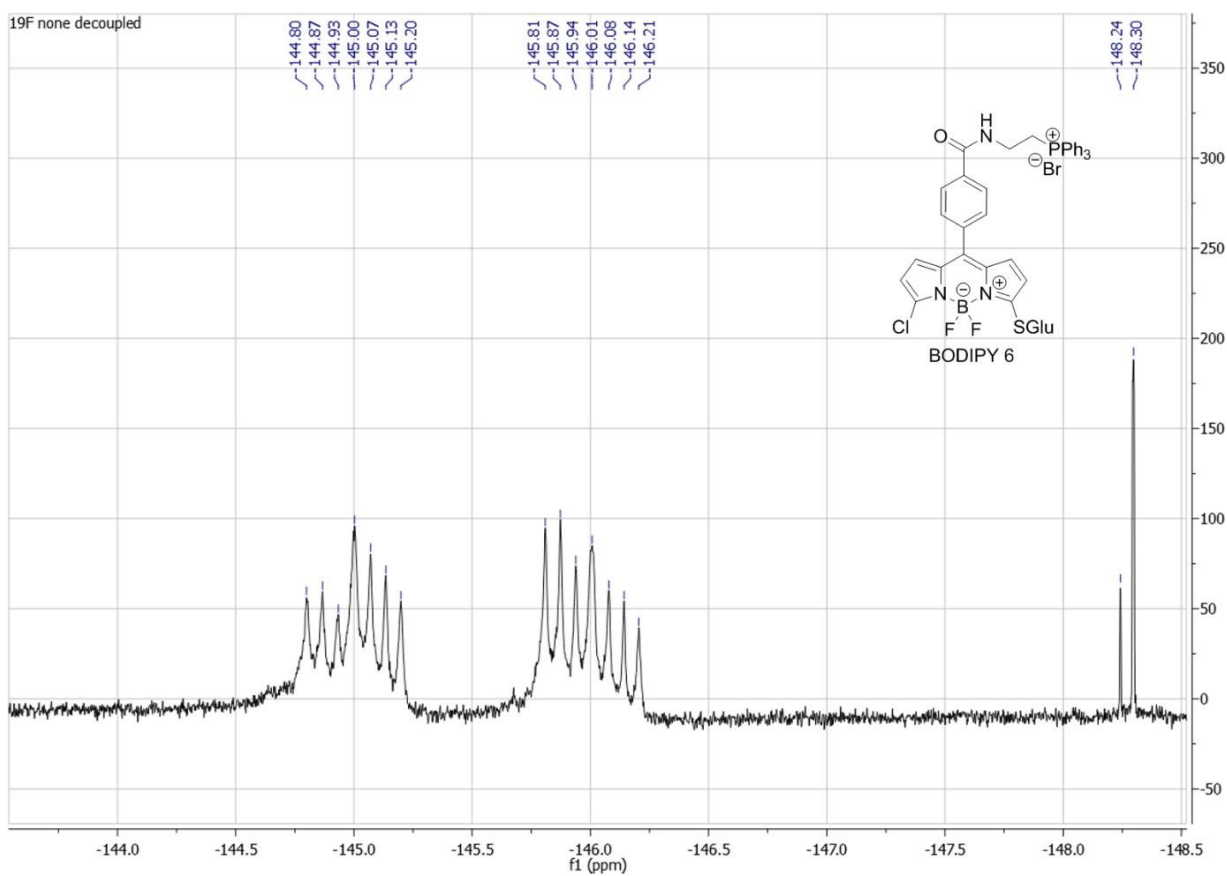

Figure S 24:  $^{19}\text{F}$  NMR of BODIPY 6 (DMSO, 470 MHz, 300K)

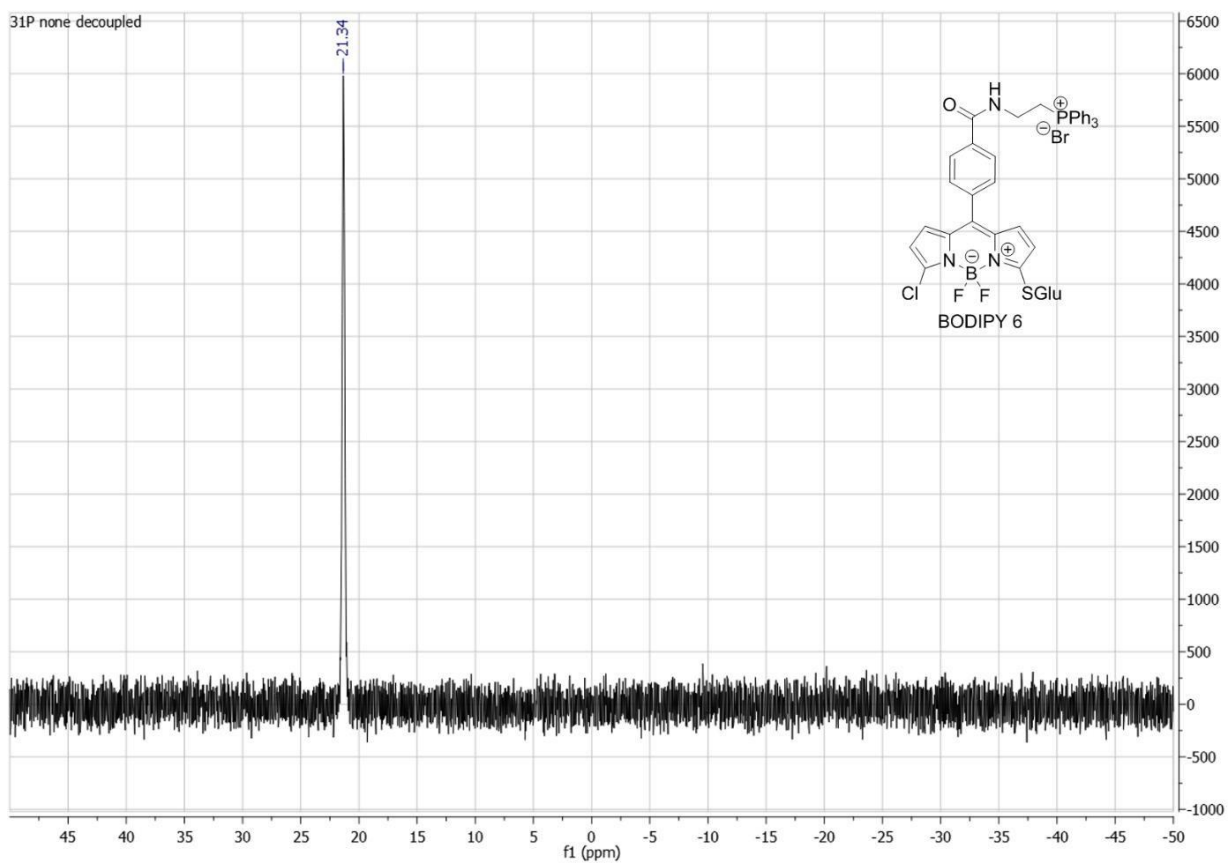

Figure S 25:  $^{31}\text{P}$ NMR of BODIPY 6 (DMSO, 202 MHz, 300K)

## BODIPY 7

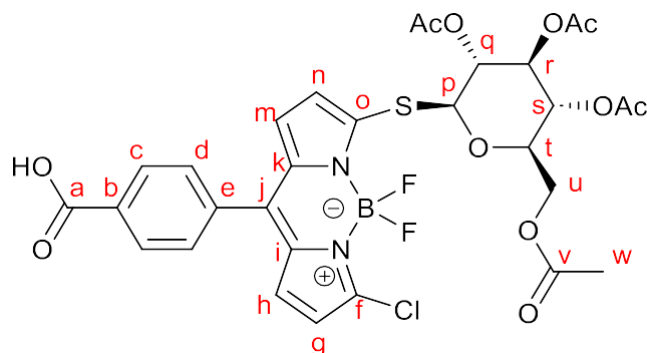

50 mg (0.13mmol, 1eq) of BODIPY 3 and 22 mg (0.26mmol, 2 eq)  $\text{NaHCO}_3$  were placed in a round bottom flask and dissolved in acetone. In a separate vessel, 43 mg (0.124mmol, 0.9eq) of  $\beta$ -thioglucose-tetraacetate were dissolved in 2 mL acetone, 124  $\mu\text{L}$  1M NaOH were added and the mixture stirred at room temperature. After 10 min, the thioglucose-solution was drawn into a syringe and added slowly (30 min) to the solution of BODIPY 3. The resulting solution was stirred at room temperature for another hour and then evaporated to dryness. The crude product was purified by column-chromatography on silica gel using  $\text{CH}_2\text{Cl}_2/\text{formic acid}$  (99:1) as eluent. The product fractions were collected, evaporated to dryness, dissolved in a minimal amount of DCM and crushed out with Pentane to yield 80mg (123.5  $\mu\text{mol}$ , yield = 95%) of the targeted compound as a pink powder.

$^1\text{H}$  NMR (500 MHz, DMSO- $\text{D}_6$ )  $\delta$  (ppm) = 1.98 (s, 3H,  $\text{H}_w$ ), 2.00 (s, 3H,  $\text{H}_w$ ), 2.01 (s, 3H,  $\text{H}_w$ ), 2.04 (s, 3H,  $\text{H}_w$ ), 4.06 (dd,  $J$  = 12.4, 2.4 Hz, 1H,  $\text{H}_u$ ), 4.15 (dd,  $J$  = 12.4, 5.8 Hz, 1H,  $\text{H}_u$ ), 4.29 (ddd,  $J$  = 10.1, 5.8, 2.3 Hz, 1H,  $\text{H}_t$ ), 5.06 (t,  $J$  = 9.8 Hz, 1H,  $\text{H}_q$ ), 5.14 (t,  $J$  = 9.7 Hz, 1H,  $\text{H}_s$ ), 5.45 (t,  $J$  = 9.5 Hz, 1H,  $\text{H}_r$ ), 5.82 (d,  $J$  = 10.1 Hz, 1H,  $\text{H}_p$ ), 6.64 (d,  $J$  = 4.2 Hz, 1H,  $\text{H}_n$ ), 6.85 (d,  $J$  = 4.2 Hz, 1H,  $\text{H}_m$ ), 6.94 (d,  $J$  = 4.7 Hz, 1H,  $\text{H}_g$ ), 7.19 (d,  $J$  = 4.7 Hz, 1H,  $\text{H}_h$ ), 7.73 (d,  $J$  = 8.2 Hz, 2H,  $\text{H}_d$ ), 8.11 (d,  $J$  = 8.3 Hz, 2H,  $\text{H}_c$ ).

$^{13}\text{C}$  NMR (126 MHz, DMSO- $\text{D}_6$ )  $\delta$  (ppm) = 20.2 ( $\text{C}_w$ ), 20.2 ( $\text{C}_w$ ), 20.3 ( $\text{C}_w$ ), 20.5 ( $\text{C}_w$ ), 61.78 ( $\text{C}_u$ ), 67.8 ( $\text{C}_s$ ), 69.2 ( $\text{C}_r$ ), 72.6 ( $\text{C}_q$ ), 74.8 ( $\text{C}_t$ ), 80.7 ( $\text{C}_p$ ), 117.5 ( $\text{C}_g$ ), 120.9 ( $\text{C}_n$ ), 129.2 ( $\text{C}_h$ ), 129.4 ( $\text{C}_m$ ), 130.8 ( $\text{C}_d$ ), 132.2 ( $\text{C}_b$ ), 132.6 ( $\text{C}_f$ ), 133.2 ( $\text{C}_c$ ), 135.6 ( $\text{C}_i$ ), 136.1 ( $\text{C}_j$ ), 139.0 ( $\text{C}_k$ ), 139.7 ( $\text{C}_e$ ), 157.7 ( $\text{C}_o$ ), 166.7 ( $\text{C}_a$ ), 169.1 ( $\text{C}_u$ ), 169.2 ( $\text{C}_u$ ), 169.5 ( $\text{C}_u$ ), 169.9 ( $\text{C}_u$ ).

$^{11}\text{B}$  NMR (160 MHz, DMSO- $\text{D}_6$ )  $\delta$  (ppm) = 0.37 (t,  $J$  = 30.2 Hz).

$^{19}\text{F}$  NMR (470 MHz, DMSO- $\text{D}_6$ )  $\delta$  (ppm) = -145.50 (dddd,  $J$  = 125.7, 90.1, 60.3, 29.9 Hz).

HR-MS (ESI):  $m/z$  = calculated for  $\text{C}_{30}\text{H}_{28}\text{B}_1\text{Cl}_1\text{F}_2\text{N}_2\text{O}_{11}\text{S}_1\text{Na}_1$  [ $\text{M}+\text{Na}$ ] $^+$  731.10557; found 731.10681,



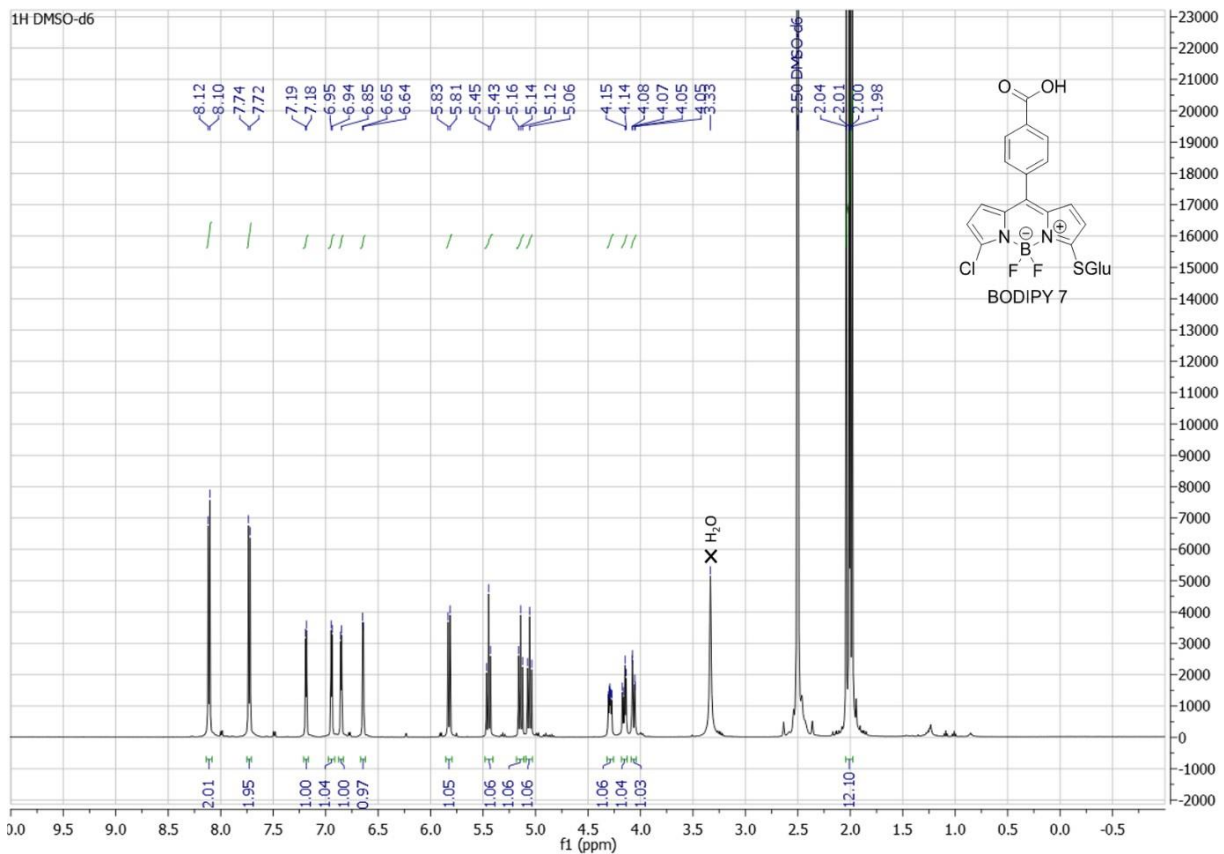

Figure S 26:  $^1\text{H}$  NMR of BODIPY 7 (DMSO, 500 MHz, 300K)

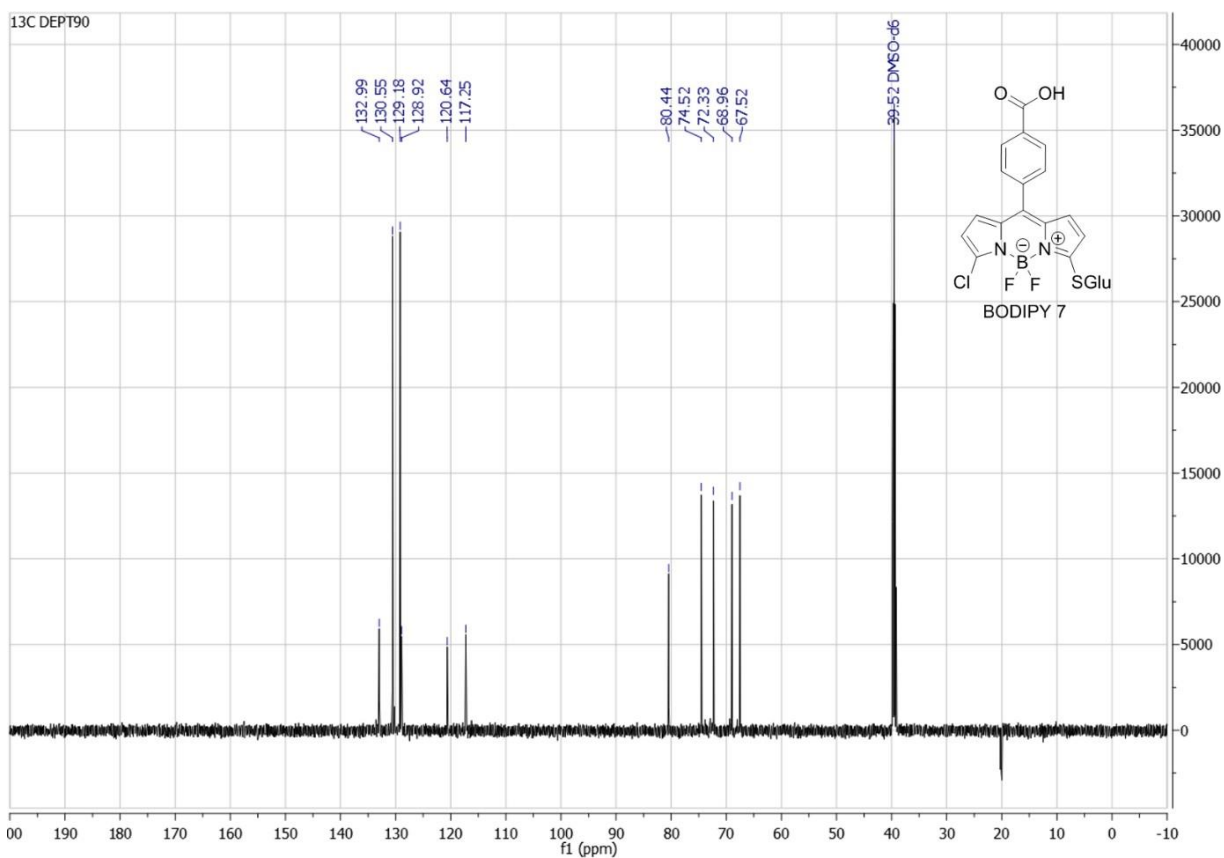

Figure S 27:  $^{13}\text{C}$  NMR (DEPT90) of BODIPY 7 (DMSO, 126 MHz, 300K)

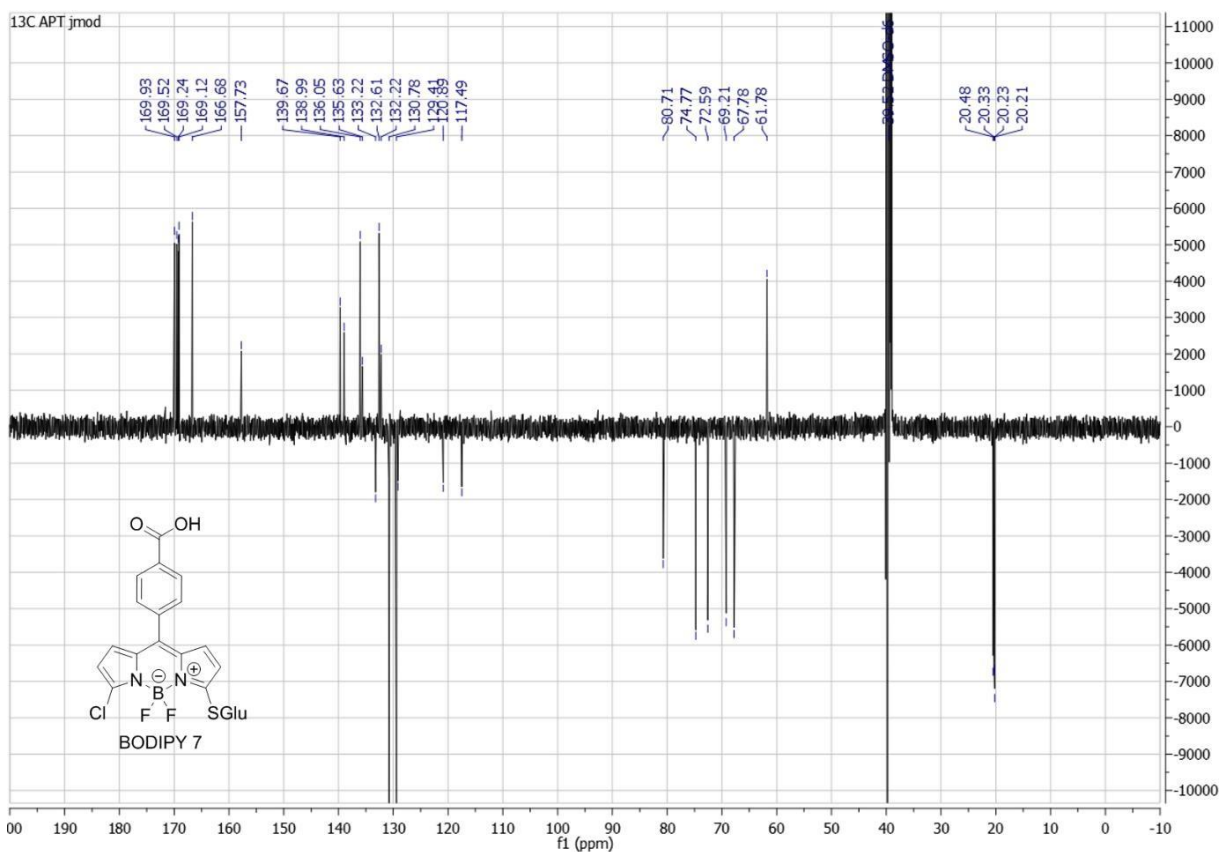

Figure S 28:  $^{13}\text{C}$  NMR (APT jmod) of BODIPY 7 (DMSO, 126 MHz, 300K)

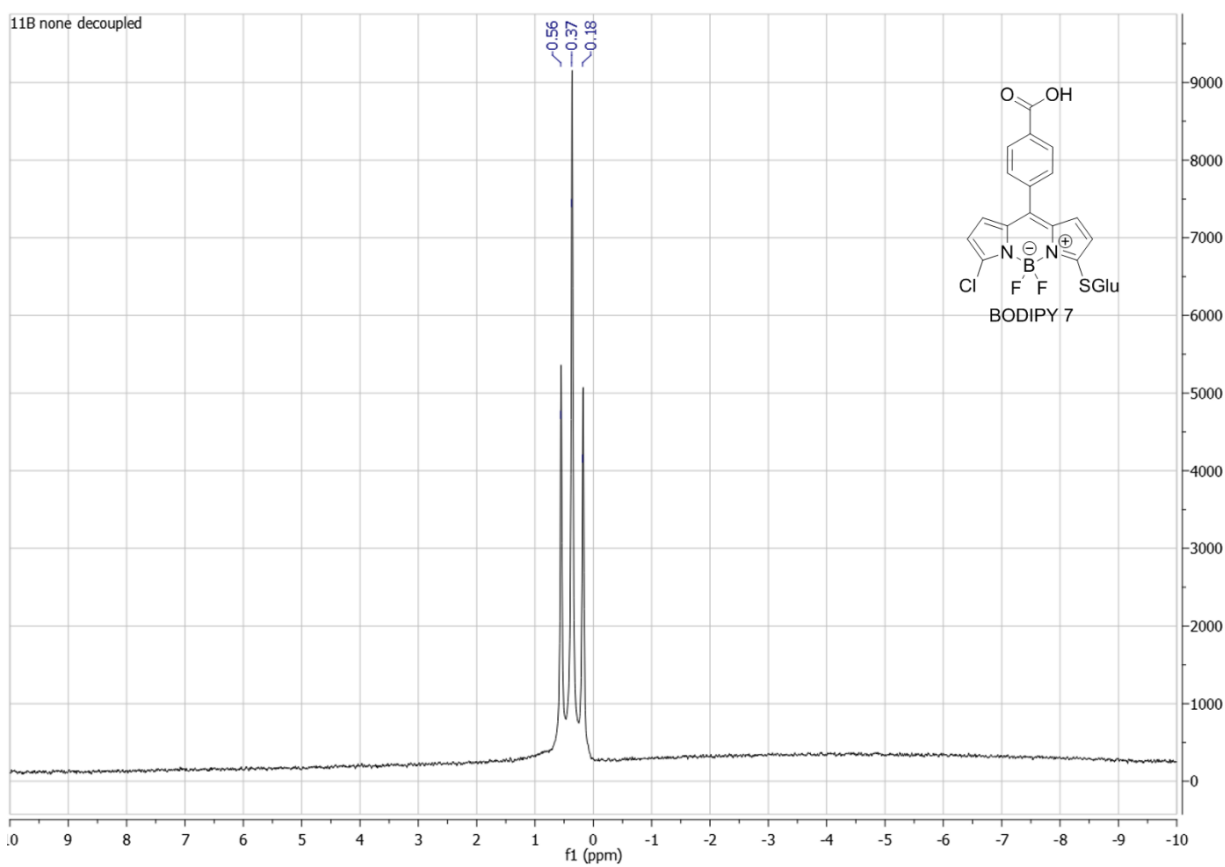

Figure S 29:  $^{11}\text{B}$  NMR of BODIPY 7 (DMSO, 160 MHz, 300K)

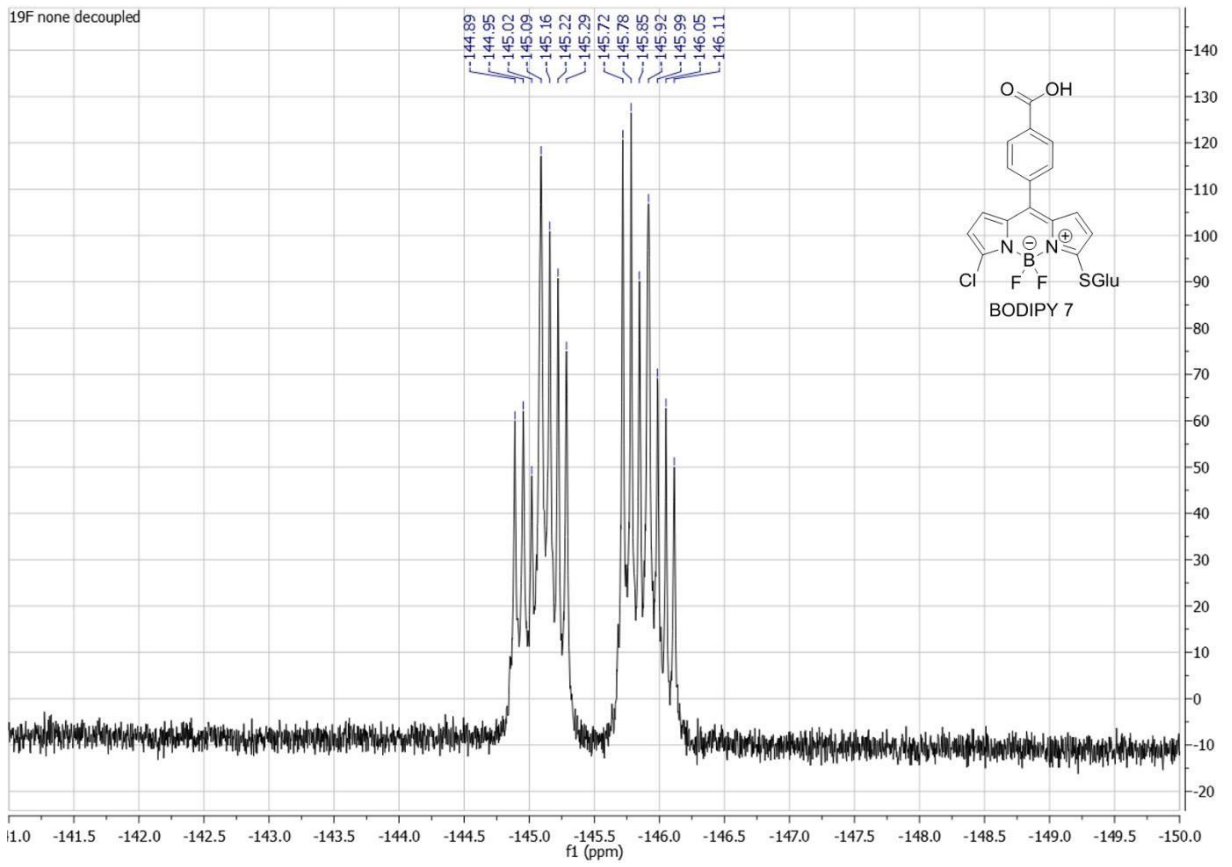

Figure S 30:  $^{19}\text{F}$  NMR of BODIPY 7 (DMSO, 470 MHz, 300K)



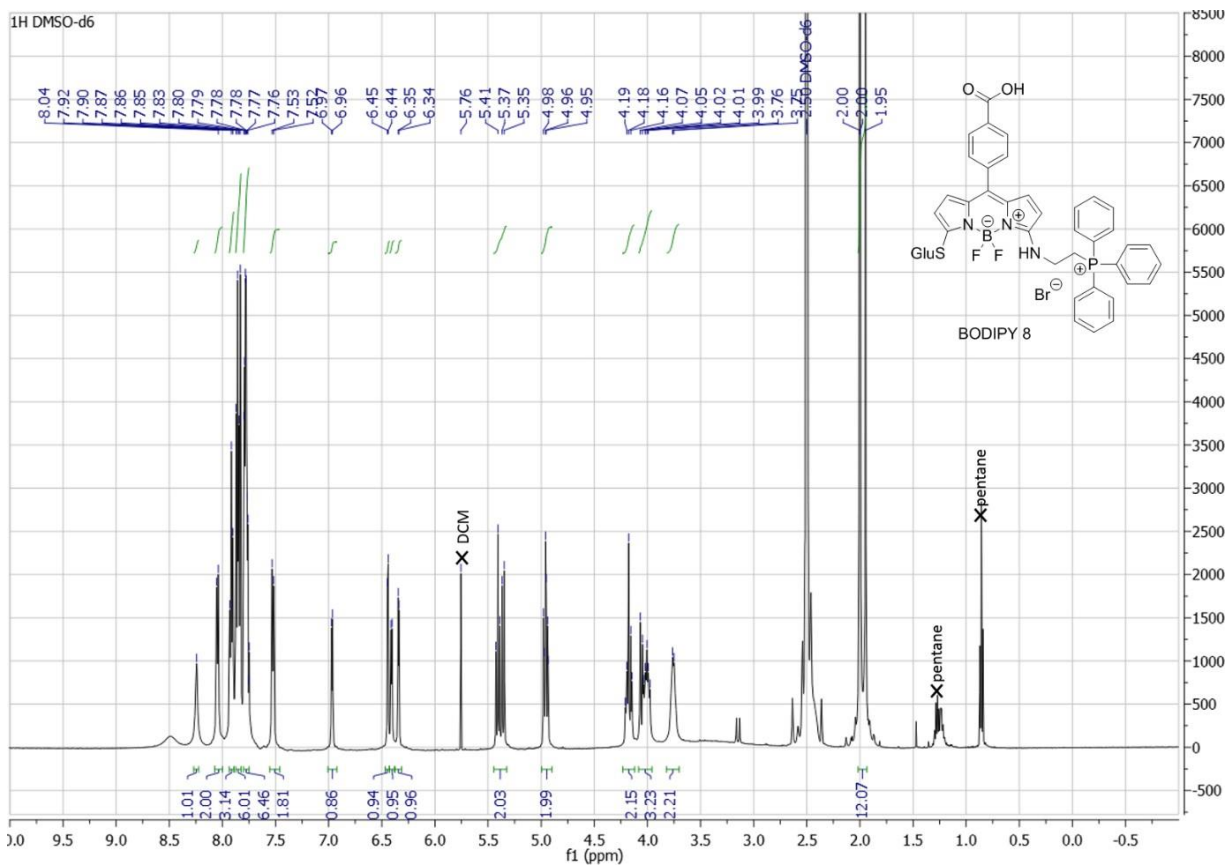

Figure S 31: <sup>1</sup>H NMR of BODIPY 8 (DMSO, 500 MHZ, 300K)

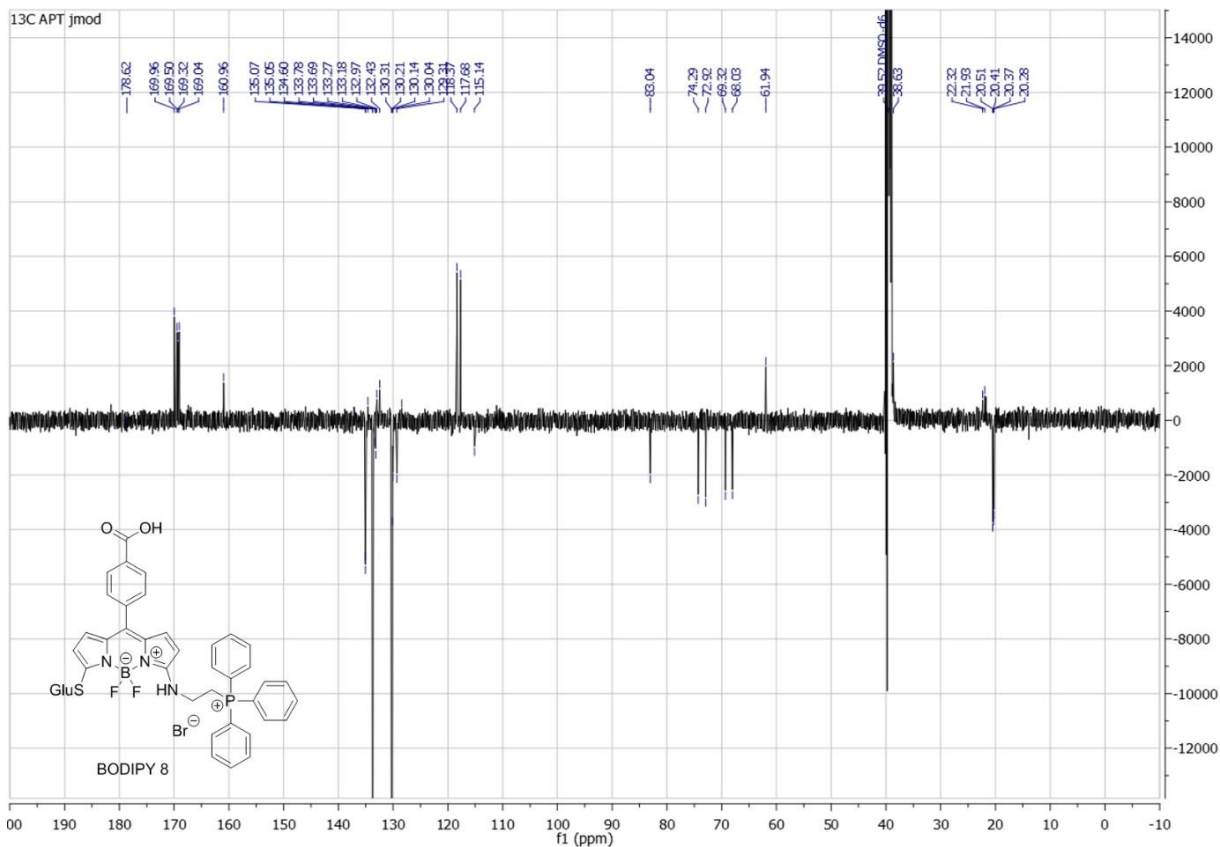

Figure S 32: <sup>13</sup>C NMR (APT jmod) of BODIPY 8 (DMSO, 126 MHZ, 300K)

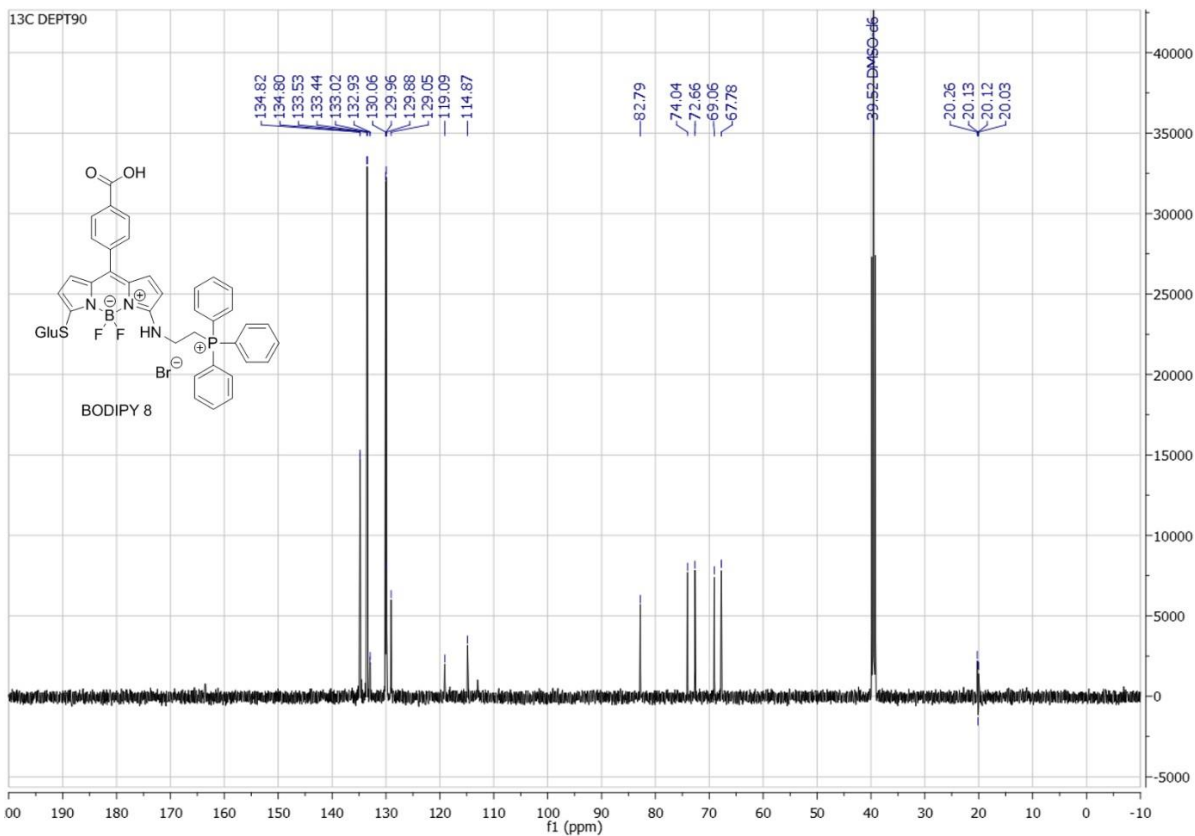

Figure S 33: <sup>13</sup>C NMR (DEPT90) of BODIPY 8 (DMSO, 126 MHz, 300K)

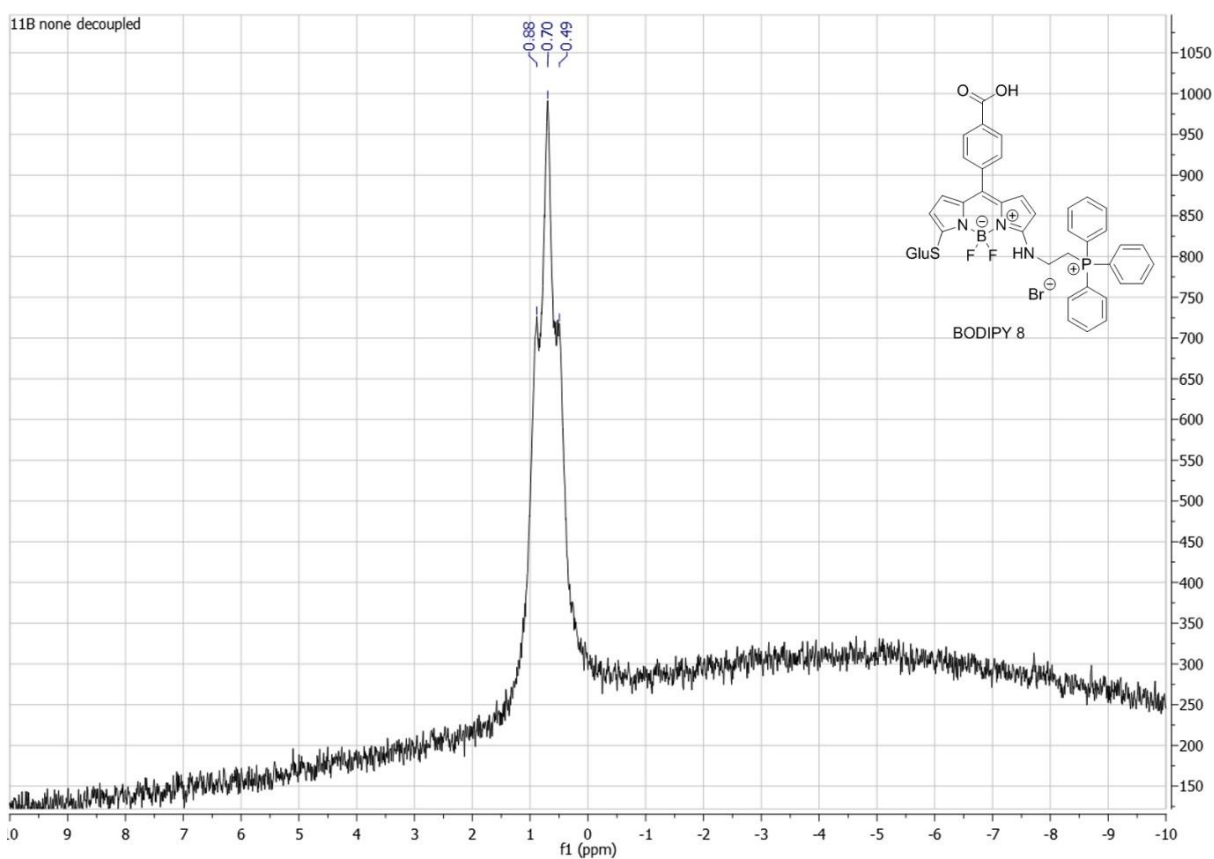

Figure S 34: <sup>11</sup>B NMR of BODIPY 8 (DMSO, 160 MHz, 300K)

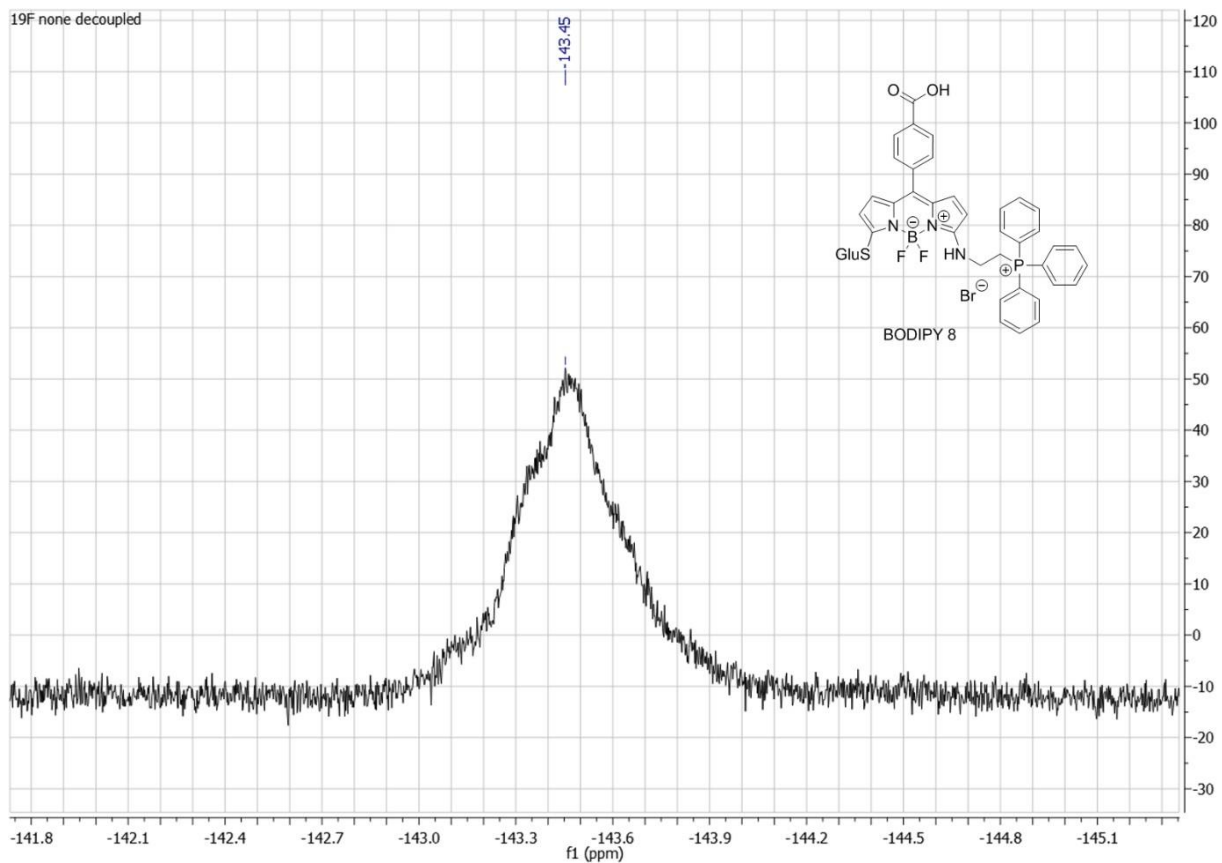

Figure S 35:  $^{19}\text{F}$  NMR of BODIPY 8 (DMSO, 470 MHz, 300K)

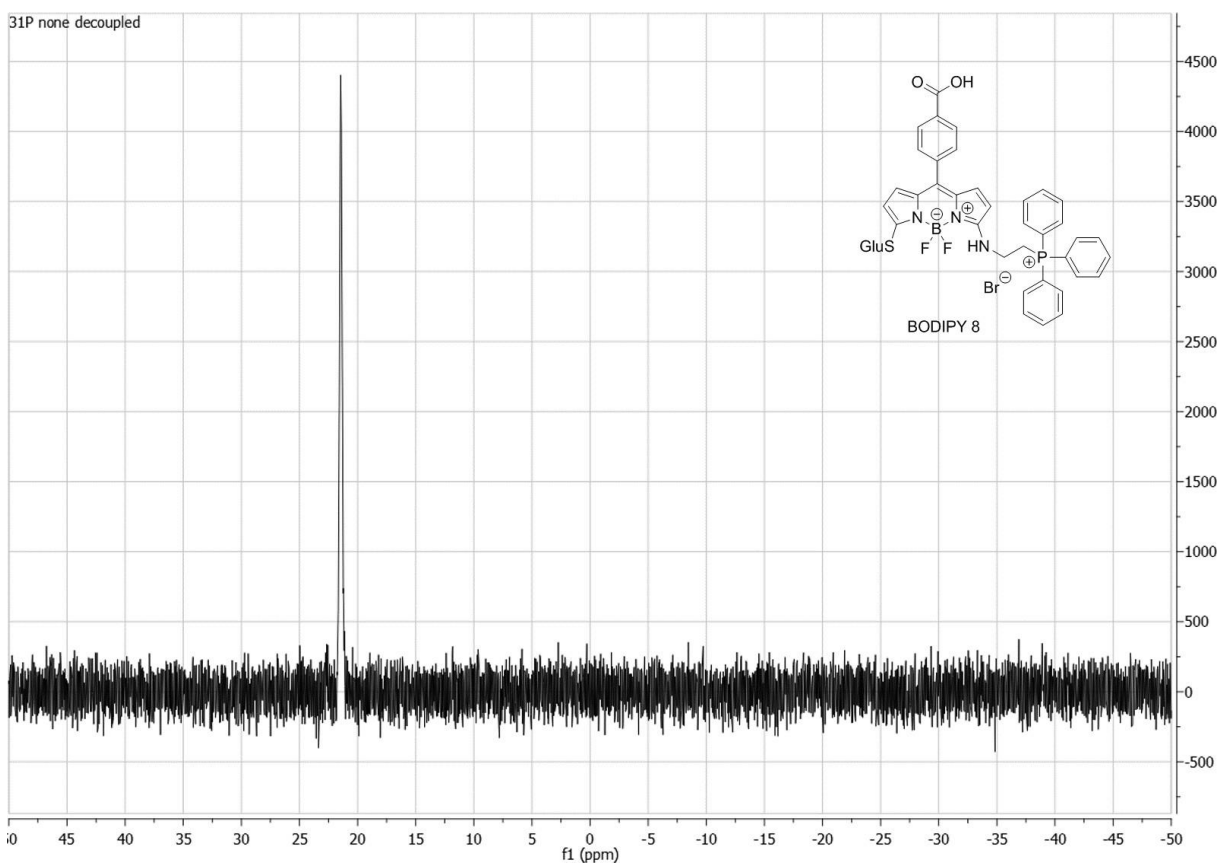

Figure S 36:  $^{31}\text{P}$  NMR of BODIPY 8 (DMSO, 202 MHz, 300K)

## BODI-Au-7

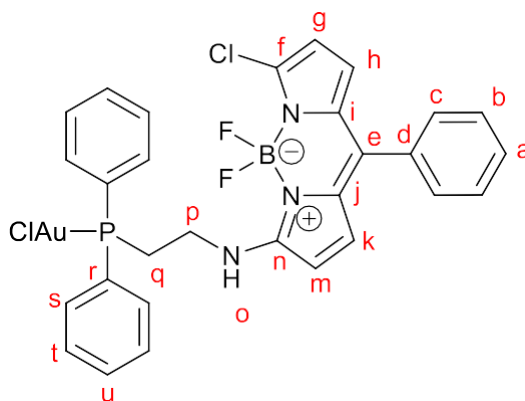

173mg (0.376mmol, 1.2eq) of 2-(diphenylphosphino)-ethylamine-aurochloride, 106mg (0.314mmol, 1eq) of BODIPY 1 and 203mg (1.47mmol, 5eq)  $K_2CO_3$  were placed in a 50 mL round bottom flask and put under argon. 15 mL dry THF were added and the reaction was refluxed for 70 minutes. The solvents were evaporated and the crude product was purified by column chromatography on silica gel using hexane/EtOAc/ $NEt_3$  (90/10/3 to 70/30/3) as eluent. After evaporation of the solvents under reduced pressure the crude product was dissolved in  $CH_2Cl_2$  and crushed out with pentane to yield 218mg (285.74 mmol, yield = 91%) of **BODI-Au-7** as an orange solid.

$^1H$  NMR (500 MHz, DMSO- $D_6$ )  $\delta$  (ppm) = 3.17 (ddd,  $J$  = 11.7, 7.8, 5.1 Hz, 2H,  $H_q$ ), 3.71 (s, 2H,  $H_p$ ), 6.19 (d,  $J$  = 3.8 Hz, 1H,  $H_m$ ), 6.24 (d,  $J$  = 3.8 Hz, 1H,  $H_k$ ), 6.57 (d,  $J$  = 5.1 Hz, 1H,  $H_g$ ), 6.96 (d,  $J$  = 5.1 Hz, 1H,  $H_h$ ), 7.47 – 7.43 (m, 2H,  $H_c$ ), 7.54 – 7.50 (m, 3H,  $H_b$ ,  $H_a$ ), 7.63 – 7.55 (m, 6H,  $H_{at}$ ,  $H_u$ ), 7.84 – 7.78 (m, 4H,  $H_s$ ), 8.58 (t,  $J$  = 5.9 Hz, 1H,  $H_o$ ).

$^{13}C$  NMR (126 MHz, DMSO- $D_6$ )  $\delta$  (ppm) = 27.4 (d,  $J$  = 36.1 Hz,  $C_p$ ), 41.2 (d,  $J$  = 9.7 Hz,  $C_q$ ), 111.8 (s,  $C_g$ ), 114.4 (s,  $C_m$ ), 117.5 (s,  $C_h$ ), 126.0 (s,  $C_i$ ,  $C_j$ ), 128.4 (s,  $C_e$ ), 128.5 (s,  $C_k$ ), 128.9 (d,  $J$  = 60.7 Hz,  $C_r$ ), 129.2 (s,  $C_a$ ), 129.4 (d,  $J$  = 11.6 Hz,  $C_u$ ), 130.1 (s,  $C_b$ ), 131.1 (s,  $C_d$ ), 132.1 (d,  $J$  = 2.3 Hz,  $C_t$ ), 133.2 (d,  $J$  = 13.5 Hz,  $C_s$ ), 133.3 (s,  $C_f$ ), 133.7 (s,  $C_n$ ), 135.8 (s,  $C_c$ ).

$^{11}B$  NMR (160 MHz, DMSO- $D_6$ )  $\delta$  (ppm) = 0.64 (t,  $J$  = 32.7 Hz).

$^{19}F$  NMR (470 MHz, DMSO- $D_6$ )  $\delta$  (ppm) = -144.48 (dd,  $J$  = 64.1, 31.5 Hz).

$^{31}P$  NMR (202 MHz, DMSO- $D_6$ )  $\delta$  (ppm) = 24.32 (s).

HR-MS (ESI):  $m/z$  = calculated for  $C_{29}H_{24}Au_1B_1Cl_2F_2N_3P_1Na_1$   $[M+Na]^+$  784.07037; found 784.07020.





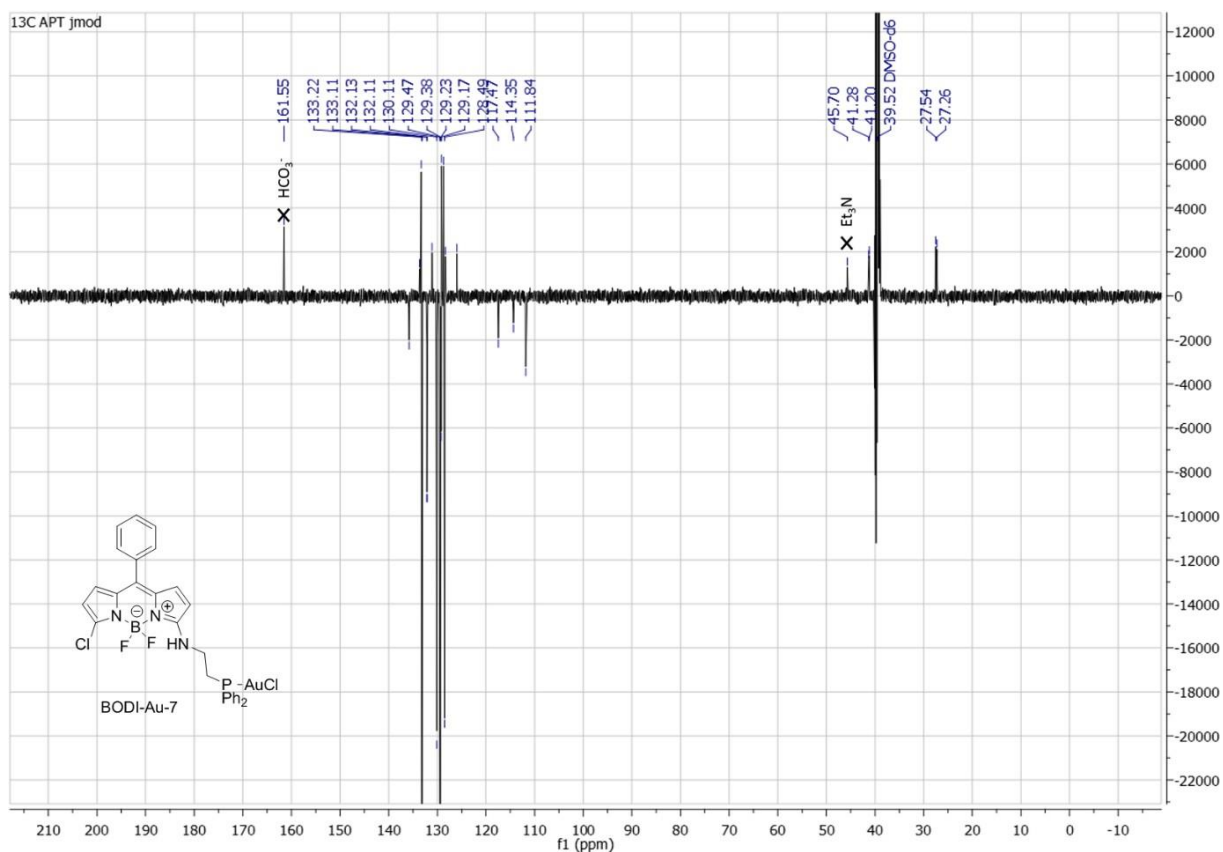

Figure S 39: <sup>13</sup>C NMR (APT jmod) of BODI-Au-7 (DMSO, 126 MHz, 300K)

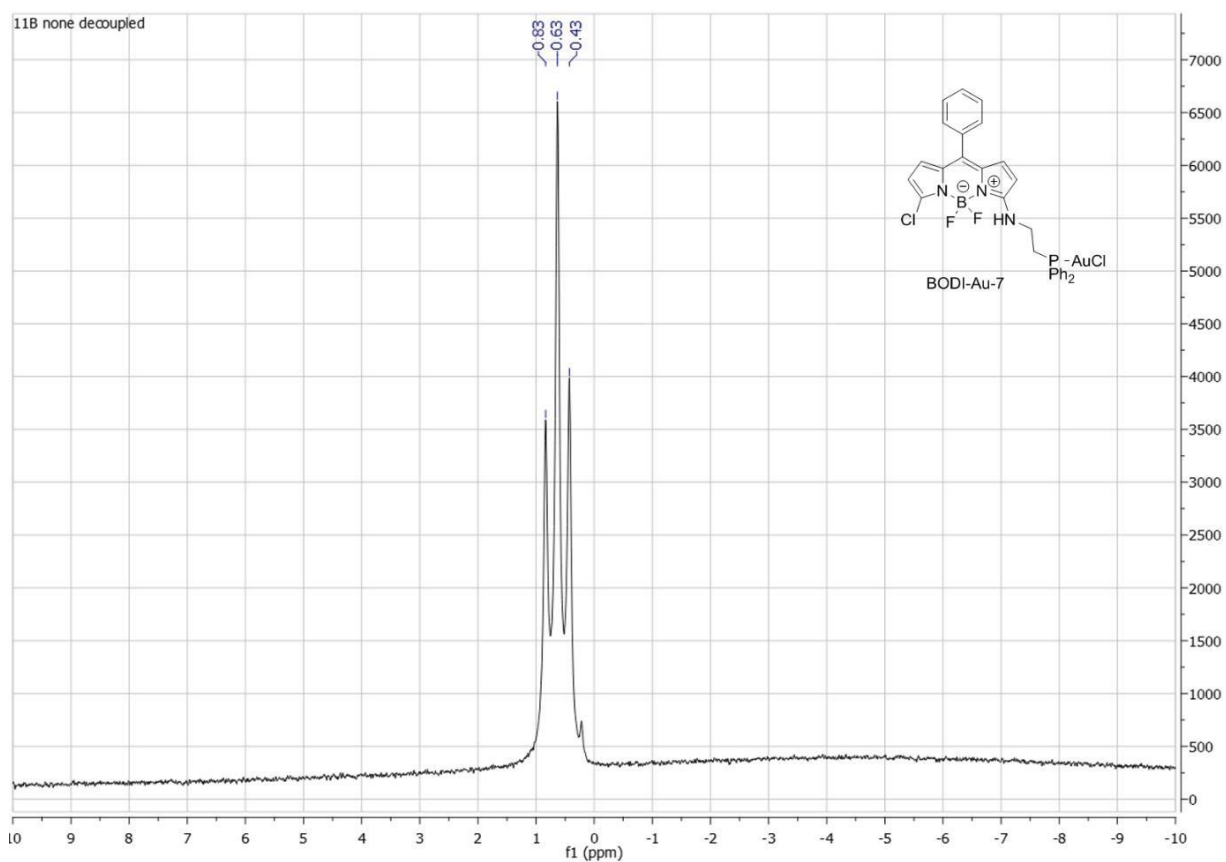

Figure S 40: <sup>11</sup>B NMR of BODI-Au-7 (DMSO, 160 MHz, 300K)

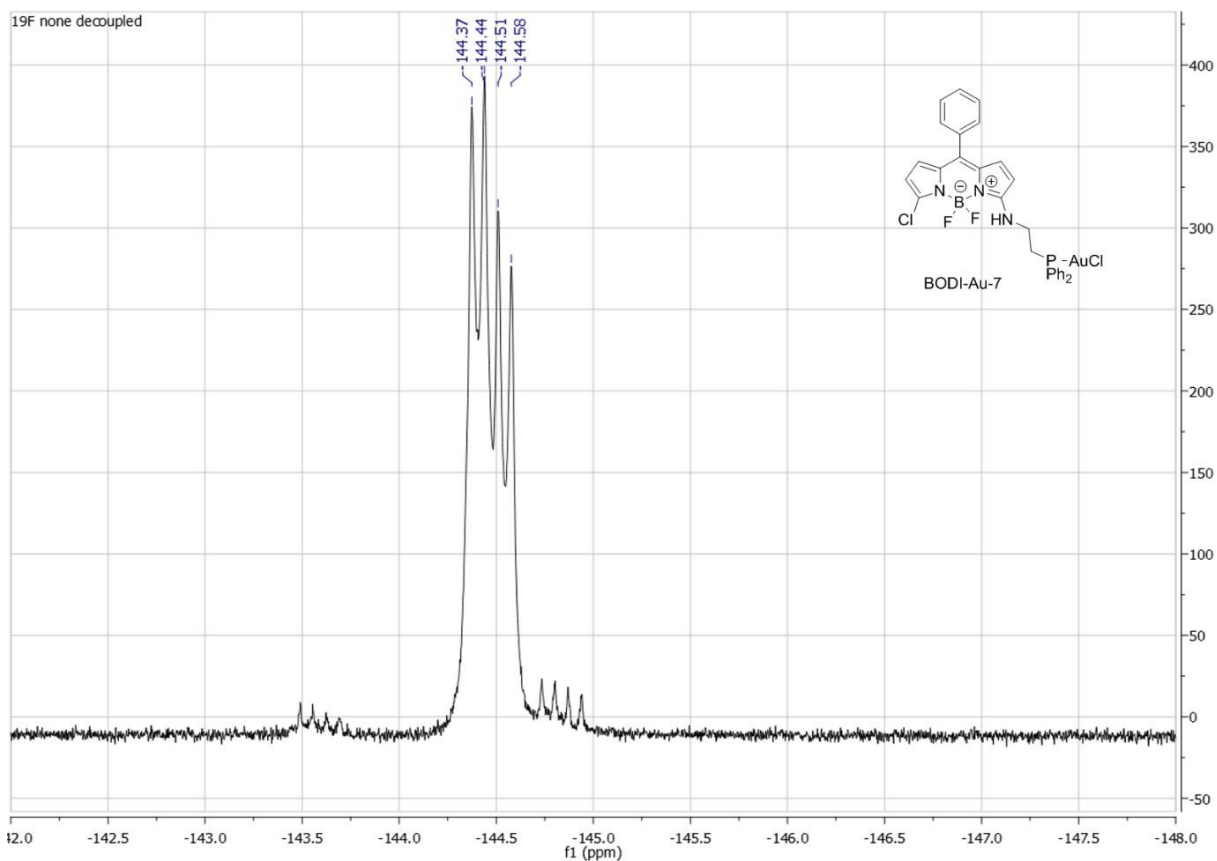

Figure S 41:  $^{19}\text{F}$  NMR of BODI-Au-7 (DMSO, 470 MHz, 300K)

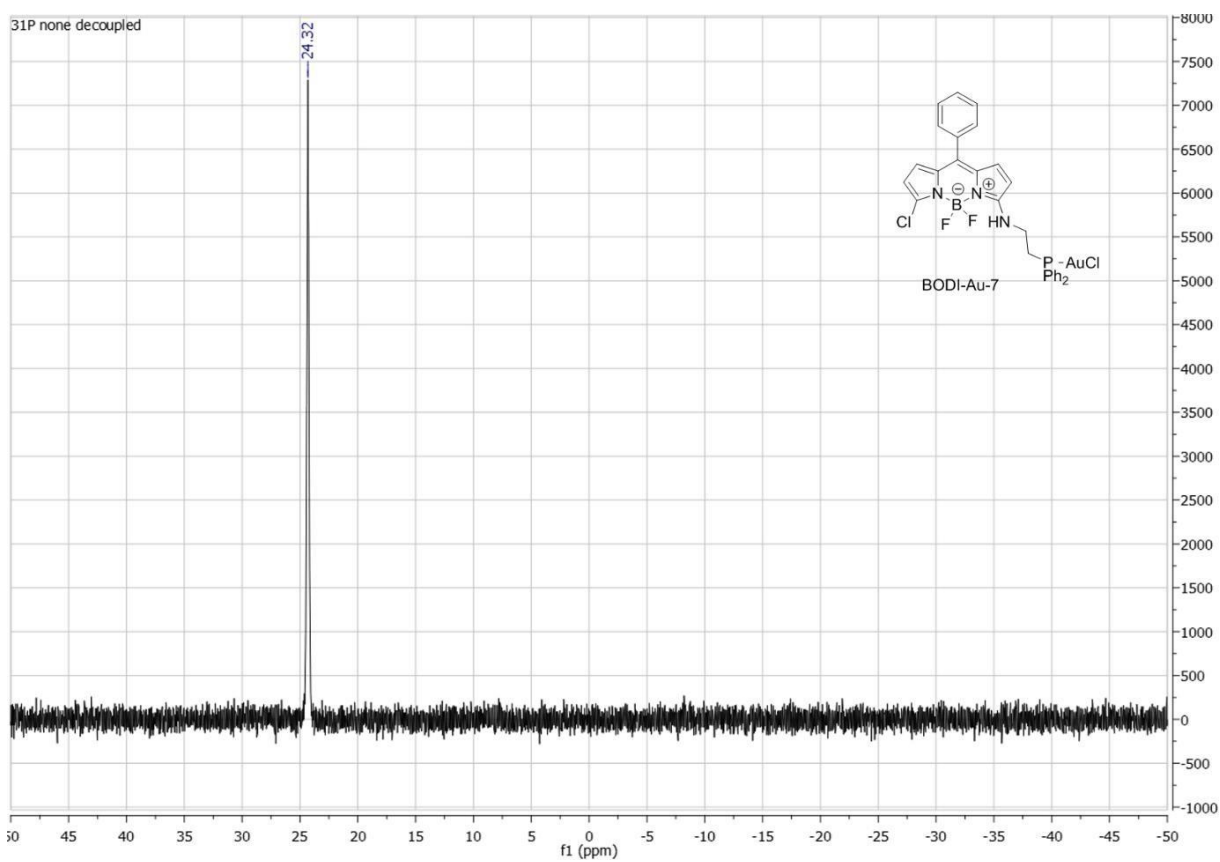

Figure S 42:  $^{31}\text{P}$  NMR of BODI-Au-7 (DMSO, 202 MHz, 300K)

## BODI-Au-8

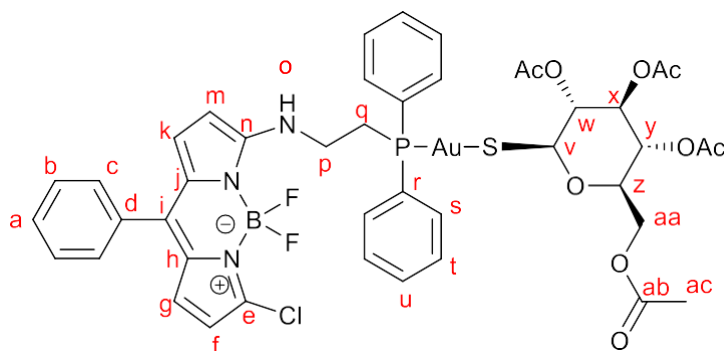

19.1 mg (52.4  $\mu$ mol) of  $\beta$ -Thioglucose tetraacetate was dissolved in acetone (1 mL). 52.4  $\mu$ l of 1M NaOH (1 eq) was added and the resulting solution stirred for 15 min. 40mg (52.4  $\mu$ mol) of **BODI-Au-7** was placed in a separate roundbottom flask and dissolved in acetone (5 mL). The thioglucose solution was added at once and the reaction stirred for 30 min at room temperature. The solvents were evaporated,  $\text{CH}_2\text{Cl}_2$  (10 mL) was added, and the supernatant separated and evaporated. The resulting crude product was dissolved in a minimal amount of  $\text{CH}_2\text{Cl}_2$  and precipitated with pentane to obtain the pure target compound as a flaky orange powder. Yield: 56mg (96%).

$^1\text{H}$  NMR (500 MHz, DMSO- $\text{D}_6$ )  $\delta$  (ppm) = 1.85 (s, 6H,  $\text{H}_{\text{ac}}$ ), 2.00 – 1.94 (m, 6H,  $\text{H}_{\text{ac}}$ ), 3.19 – 3.07 (m, 2H,  $\text{H}_{\text{q}}$ ), 3.74 (ddd,  $J$  = 15.3, 12.5, 7.5 Hz, 2H,  $\text{H}_{\text{p}}$ ), 4.03 – 3.96 (m, 2H,  $\text{H}_{\text{aa}}$ ,  $\text{H}_{\text{z}}$ ), 4.08 (dd,  $J$  = 12.7, 5.8 Hz, 1H,  $\text{H}_{\text{aa}}$ ), 4.90 (ps-dt,  $J$  = 13.2, 9.6 Hz, 2H,  $\text{H}_{\text{w}}$ ,  $\text{H}_{\text{y}}$ ), 5.18 (t,  $J$  = 9.5 Hz, 1H,  $\text{H}_{\text{x}}$ ), 5.33 (d,  $J$  = 9.4 Hz, 1H,  $\text{H}_{\text{v}}$ ), 6.20 (d,  $J$  = 3.8 Hz, 1H,  $\text{H}_{\text{m}}$ ), 6.24 (d,  $J$  = 3.8 Hz, 1H,  $\text{H}_{\text{k}}$ ), 6.59 (d,  $J$  = 5.1 Hz, 1H,  $\text{H}_{\text{f}}$ ), 6.96 (d,  $J$  = 5.1 Hz, 1H,  $\text{H}_{\text{g}}$ ), 7.47 – 7.44 (m, 2H,  $\text{H}_{\text{c}}$ ), 7.54 – 7.48 (m, 3H,  $\text{H}_{\text{b}}$ ,  $\text{H}_{\text{a}}$ ), 7.62 – 7.55 (m, 6H,  $\text{H}_{\text{at}}$ ,  $\text{H}_{\text{u}}$ ), 7.92 – 7.80 (m, 4H,  $\text{H}_{\text{s}}$ ), 8.58 (t,  $J$  = 6.2 Hz, 1H,  $\text{H}_{\text{o}}$ ).

$^{13}\text{C}$  NMR (126 MHz, DMSO- $\text{D}_6$ )  $\delta$  (ppm) = 20.3 (s,  $\text{C}_{\text{ac}}$ ), 20.3 (s,  $\text{C}_{\text{ac}}$ ), 20.4 (s,  $\text{C}_{\text{ac}}$ ), 20.8 (s,  $\text{C}_{\text{ac}}$ ), 27.5 (d,  $J$  = 32.6 Hz,  $\text{C}_{\text{p}}$ ), 41.3 (d,  $J$  = 12.1 Hz,  $\text{C}_{\text{q}}$ ), 62.4 (s,  $\text{C}_{\text{aa}}$ ), 68.6 (s,  $\text{C}_{\text{y}}$ ), 73.2 (s,  $\text{C}_{\text{x}}$ ), 74.3 (s,  $\text{C}_{\text{w}}$ ), 77.5 (s,  $\text{C}_{\text{z}}$ ), 81.8 (s,  $\text{C}_{\text{v}}$ ), 111.8 (s,  $\text{C}_{\text{f}}$ ), 114.1 (s,  $\text{C}_{\text{m}}$ ), 117.5 (s,  $\text{C}_{\text{g}}$ ), 126.0 (s,  $\text{C}_{\text{h}}$ ,  $\text{C}_{\text{j}}$ ), 128.4 (s,  $\text{C}_{\text{i}}$ ), 128.4 (s,  $\text{C}_{\text{k}}$ ), 129.2 (s,  $\text{C}_{\text{a}}$ ), 129.3 (d,  $J$  = 11.3 Hz,  $\text{C}_{\text{u}}$ ), 129.8 (dd,  $J$  = 55.0, 26.9 Hz,  $\text{C}_{\text{r}}$ ), 130.1 (s,  $\text{C}_{\text{b}}$ ), 131.1 (s,  $\text{C}_{\text{d}}$ ), 131.9 (dd,  $J$  = 9.4, 0.9 Hz,  $\text{C}_{\text{t}}$ ), 133.2 (dd,  $J$  = 23.9, 13.7 Hz,  $\text{C}_{\text{s}}$ ), 133.3 (s,  $\text{C}_{\text{e}}$ ), 133.6 (s,  $\text{C}_{\text{n}}$ ), 135.8 (s,  $\text{C}_{\text{c}}$ ), 169.2 (s,  $\text{C}_{\text{ab}}$ ), 169.3 (s,  $\text{C}_{\text{ab}}$ ), 169.4 (s,  $\text{C}_{\text{ab}}$ ), 170.0 (s,  $\text{C}_{\text{ab}}$ ).

$^{11}\text{B}$  NMR (160 MHz, DMSO- $\text{D}_6$ )  $\delta$  (ppm) = 0.63 (t,  $J$  = 32.6 Hz).

$^{19}\text{F}$  NMR (470 MHz, DMSO- $\text{D}_6$ )  $\delta$  (ppm) = -144.52 (dd,  $J$  = 65.1, 30.2 Hz).

$^{31}\text{P}$  NMR (202 MHz, DMSO- $\text{D}_6$ )  $\delta$  (ppm) = 29.67.

HR-MS (ESI):  $m/z$  = calculated for  $\text{C}_{43}\text{H}_{43}\text{Au}_1\text{B}_1\text{Cl}_1\text{F}_2\text{N}_3\text{O}_9\text{P}_1\text{S}_1\text{Na}_1$  [ $\text{M} + \text{Na}$ ] $^+$  1112.1765; found 1112.17971.

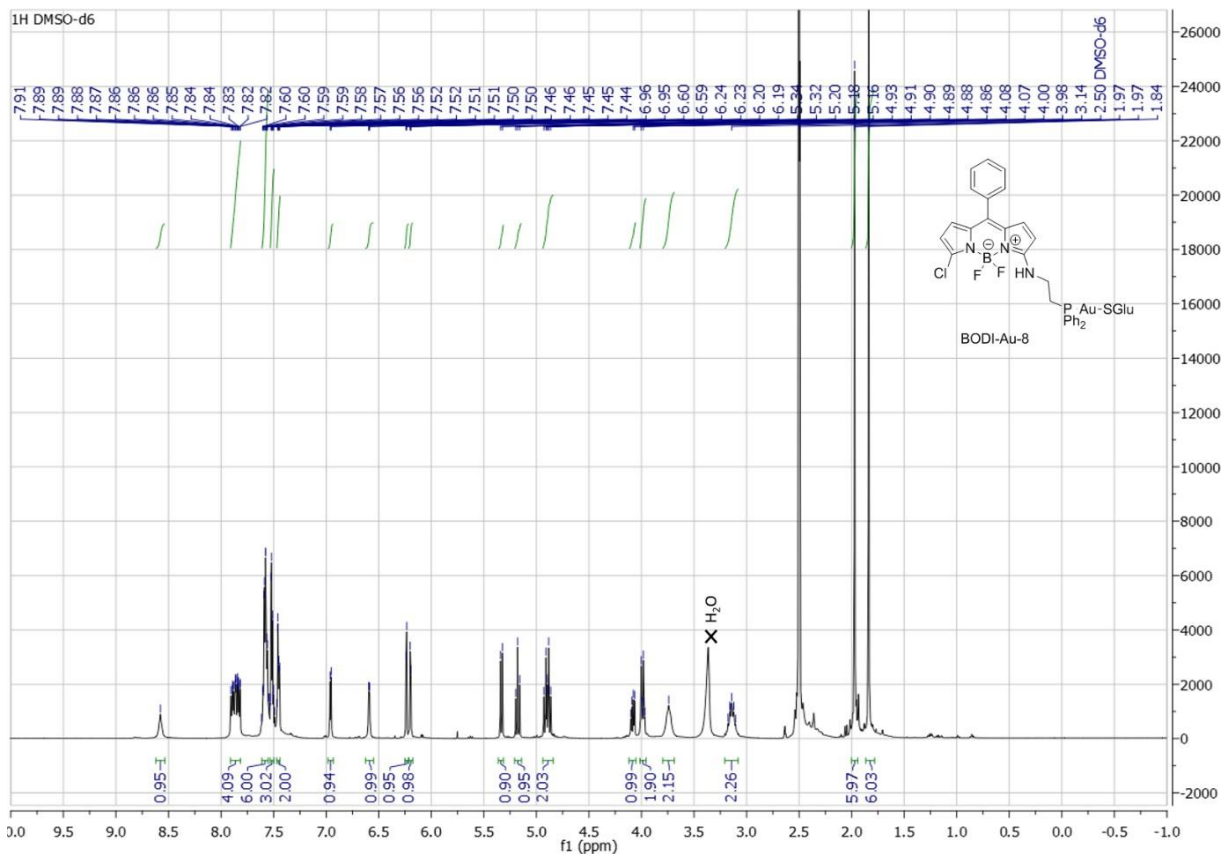

Figure S 43: <sup>1</sup>H NMR of BODI-Au-8 (DMSO, 500 MHZ, 300K)

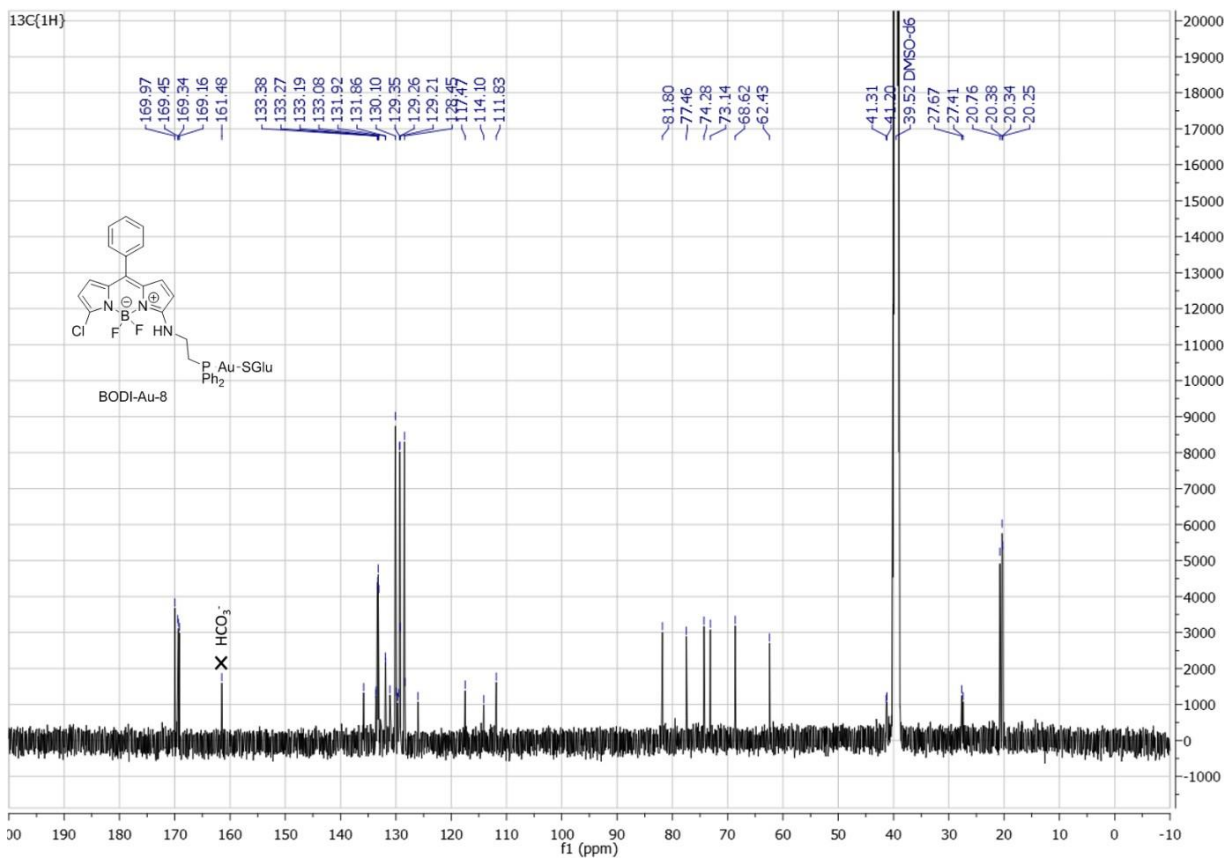

Figure S 44: <sup>13</sup>C NMR of BODI-Au-8 (DMSO, 126 MHZ, 300K)

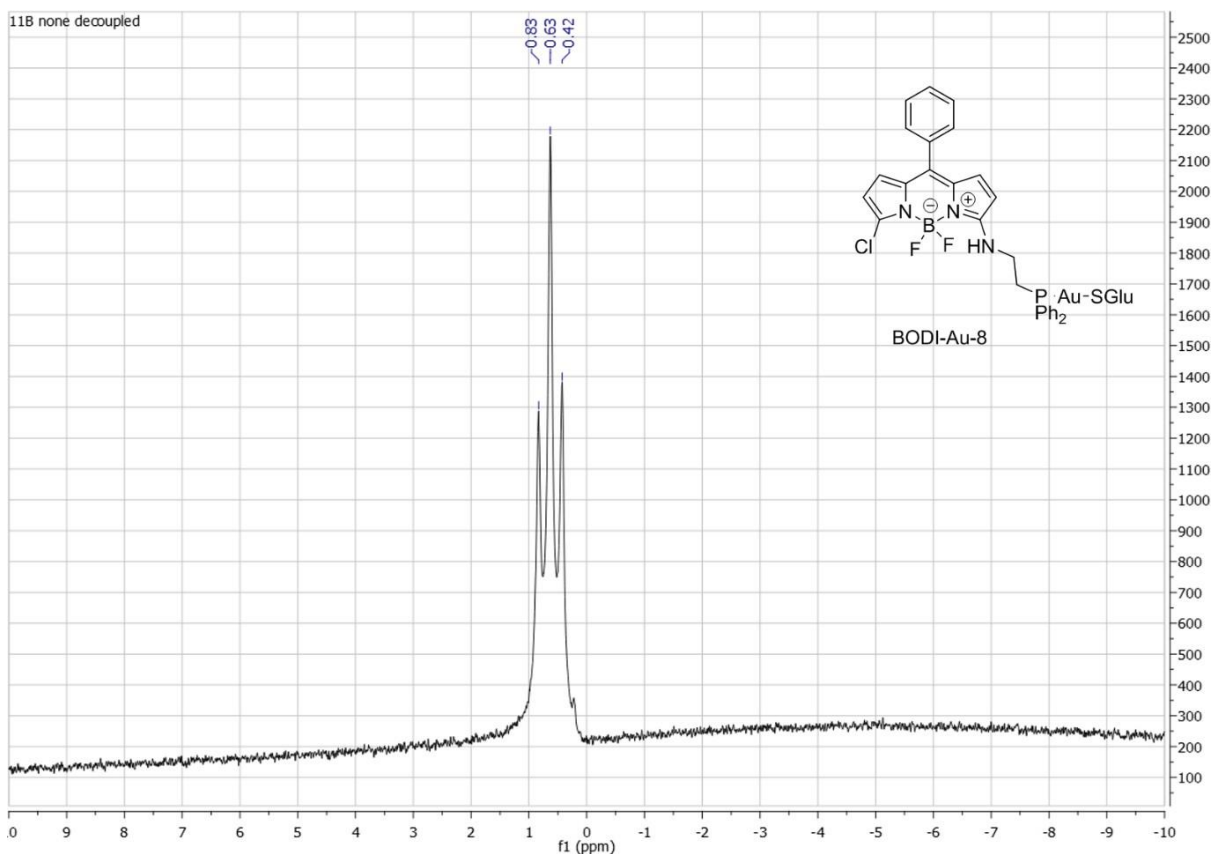

Figure S 45:  $^{11}\text{B}$  NMR of BODI-Au-8 (DMSO, 160 MHz, 300K)

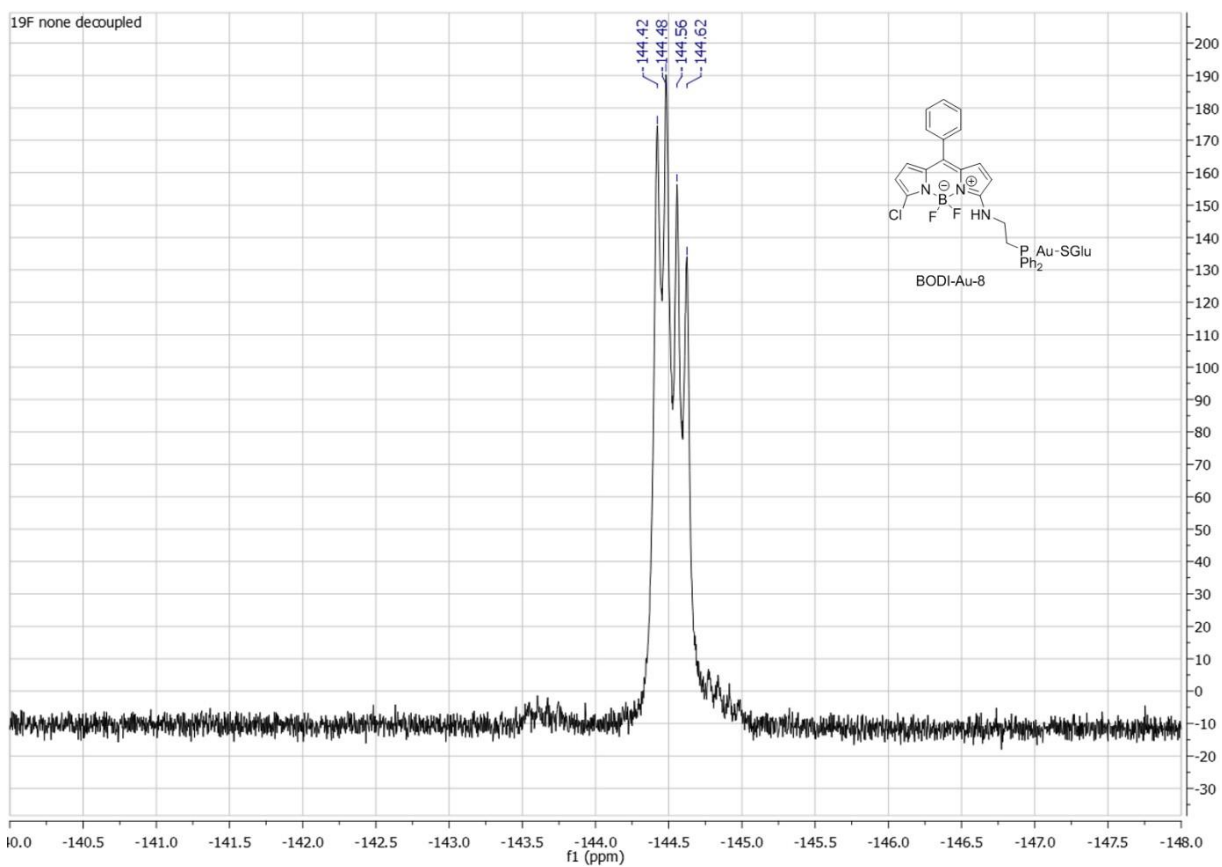

Figure S 46:  $^{19}\text{F}$  NMR of BODI-Au-8 (DMSO, 470 MHz, 300K)

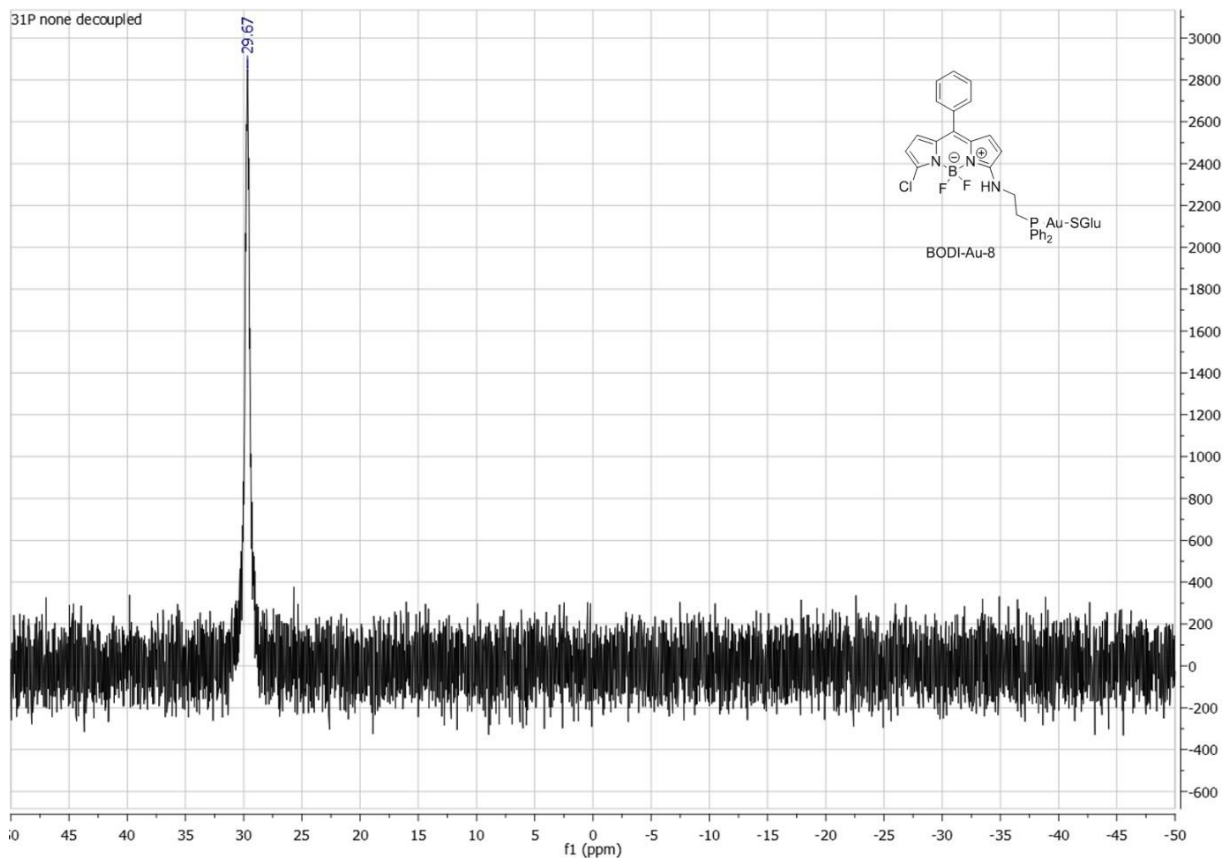

Figure S 47:  $^{31}\text{P}$  NMR of **BODI-Au-8** (DMSO, 202 MHz, 300K)

## BODI-Au-9

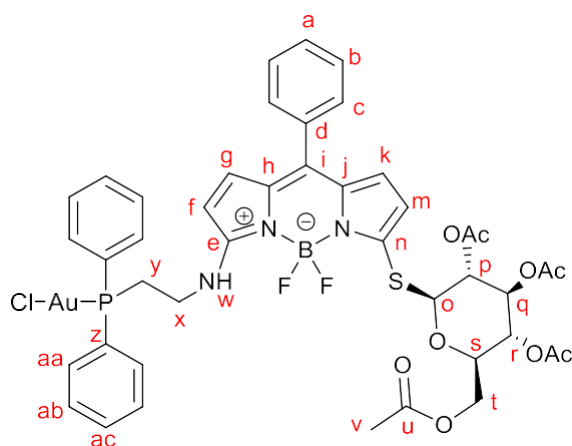

20mg (0.03mmol, 1eq) of BODIPY 4 were placed in a roundbottom flask and suspended in 10 mL of dry THF. 2-(Diphenylphosphino) ethylamine-aurichloride (15.3m, 0.033mmol, 1.1eq) and  $\text{NaHCO}_3$  (10.1mg, 0.12mmol, 4eq) were added, and the reaction was refluxed for 1h. Upon total consumption of the starting BODIPY the solvents were evaporated and the crude product was purified by column chromatography on silica gel, using  $\text{CH}_2\text{Cl}_2$  as eluent. The product fractions were evaporated to dryness, dissolved in  $\text{CH}_2\text{Cl}_2$  and precipitated by addition of pentane twice to obtain **BODI-Au-9** (31mg, 28.5 $\mu\text{mol}$  95% yield) as an orange-pink powder.

$^1\text{H}$  NMR (500 MHz,  $\text{DMSO-D}_6$ )  $\delta$  (ppm)= 1.94 (s, 3H,  $\text{H}_v$ ), 1.99 (s, 3H,  $\text{H}_v$ ), 2.01 (s, 6H,  $\text{H}_v$ ), 3.15 (ddd,  $J = 11.0, 8.4, 5.2$  Hz, 2H,  $\text{H}_y$ ), 3.68 (dt,  $J = 21.4, 7.8$  Hz, 2H,  $\text{H}_x$ ), 4.05 (dd,  $J = 14.8, 5.2$  Hz, 1H,  $\text{H}_s$ ), 4.16 (q,  $J = 5.3$  Hz, 2H,  $\text{H}_t$ ), 4.94 (ps-tt,  $J = 9.6, 2.0$  Hz, 2H,  $\text{H}_r, \text{H}_p$ ), 5.32 (d,  $J = 10.1$  Hz, 1H,  $\text{H}_o$ ), 5.40 (t,  $J = 9.4$  Hz, 1H,  $\text{H}_q$ ), 6.28 (d,  $J = 3.8$  Hz, 1H,  $\text{H}_f$ ), 6.42 (d,  $J = 3.8$  Hz, 1H,  $\text{H}_g$ ), 6.48 (d,  $J = 5.1$  Hz, 1H,  $\text{H}_m$ ), 6.90 (d,  $J = 5.1$  Hz, 1H,  $\text{H}_k$ ), 7.46–7.43 (m, 2H,  $\text{H}_c$ ), 7.54–7.50 (m, 3H,  $\text{H}_a, \text{H}_b$ ), 7.62–7.55 (m, 6H,  $\text{H}_{ab}, \text{H}_{ac}$ ), 7.84–7.78 (m, 4H,  $\text{H}_{aa}$ ), 8.40 (s, 1H,  $\text{H}_w$ ).

$^{13}\text{C}$  NMR (126 MHz,  $\text{DMSO-D}_6$ )  $\delta$  (ppm)= 20.3 (s,  $\text{C}_v$ ), 20.4 (s,  $\text{C}_v$ ), 20.4 (s,  $\text{C}_v$ ), 20.5 (s,  $\text{C}_v$ ), 27.4 (d,  $J = 35.6$  Hz,  $\text{C}_x$ ), 41.2 (d,  $J = 10.8$  Hz,  $\text{C}_y$ ), 61.9 (s,  $\text{C}_t$ ), 68.1 (s,  $\text{C}_r$ ), 69.3 (s,  $\text{C}_q$ ), 73.0 (s,  $\text{C}_p$ ), 74.3 (s,  $\text{C}_s$ ), 83.3 (s,  $\text{C}_o$ ), 113.0 (s,  $\text{C}_f$ ), 115.2 (s,  $\text{C}_m$ ), 118.7 (s,  $\text{C}_g$ ), 128.5 (s,  $\text{C}_a$ ), 128.7 (s,  $\text{C}_h$ ), 129.0 (d,  $J = 60.6$  Hz,  $\text{C}_z$ ), 129.2 (s,  $\text{C}_k$ ), 129.2 (s,  $\text{C}_i$ ), 129.4 (d,  $J = 11.7$  Hz,  $\text{C}_{ac}$ ), 130.1 (s,  $\text{C}_b$ ), 132.1 (d,  $J = 2.2$  Hz,  $\text{C}_{ab}$ ), 132.8 (s,  $\text{C}_j$ ), 133.2 (d,  $J = 13.6$  Hz,  $\text{C}_{aa}$ ), 133.6 (s,  $\text{C}_d$ ), 133.8 (s,  $\text{C}_e$ ), 135.2 (s,  $\text{C}_c$ ), 161.0 (s,  $\text{C}_n$ ), 169.1 (s,  $\text{C}_u$ ), 169.3 (s,  $\text{C}_u$ ), 169.5 (s,  $\text{C}_u$ ), 170.0 (s,  $\text{C}_u$ )

$^{11}\text{B}$  NMR (160 MHz,  $\text{DMSO-D}_6$ )  $\delta$  (ppm)= 0.72 (t,  $J = 33.7$  Hz).

$^{19}\text{F}$  NMR (470 MHz,  $\text{DMSO-D}_6$ )  $\delta$  (ppm)= -143.29 (dd,  $J = 194.7, 81.2$  Hz).

$^{31}\text{P}$  NMR (202 MHz,  $\text{DMSO-D}_6$ )  $\delta$  (ppm) = 24.40.

HR-MS (ESI):  $m/z$  = calculated for  $\text{C}_{43}\text{H}_{43}\text{Au}_1\text{B}_1\text{Cl}_1\text{F}_2\text{N}_3\text{O}_9\text{P}_1\text{S}_1\text{Na}_1$   $[\text{M}+\text{Na}]^+$  1112.17650; found 1112.17964.





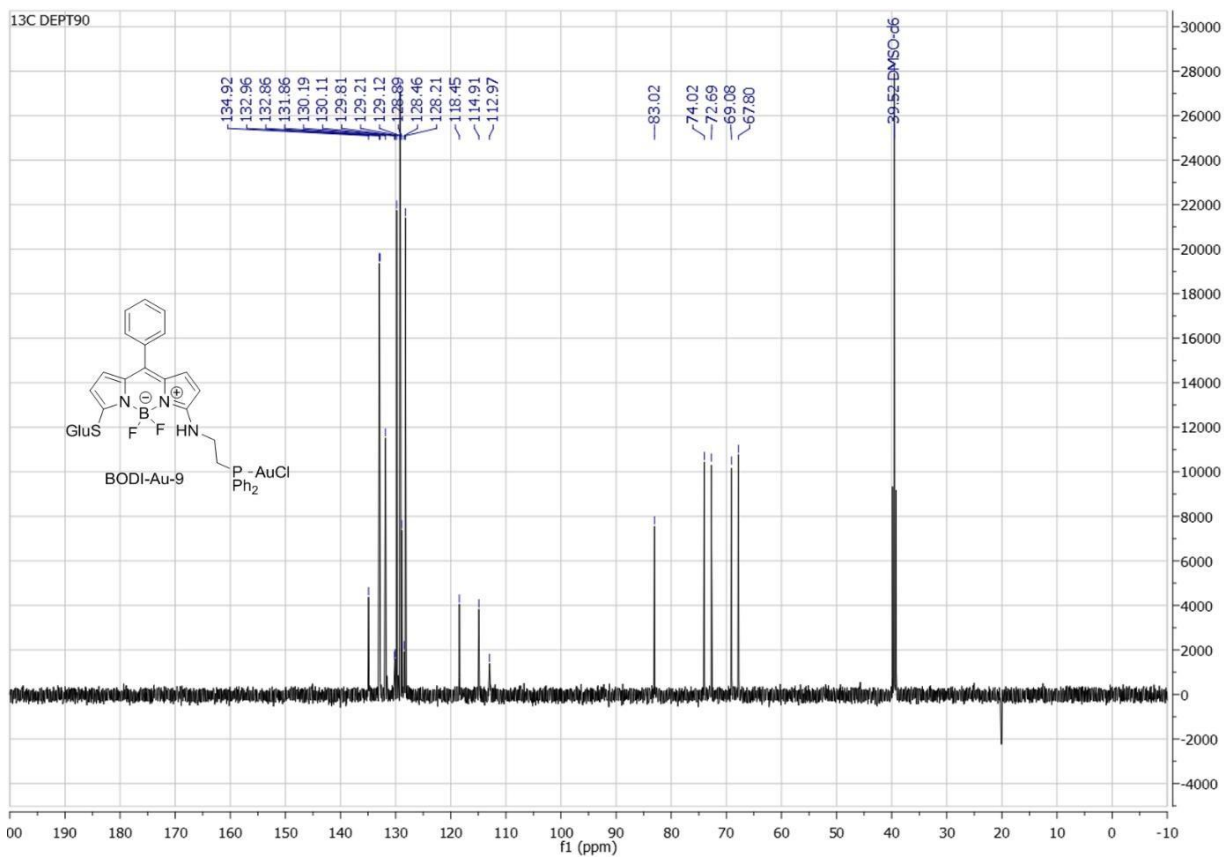

Figure S 50:  $^{13}\text{C}$  NMR (DEPT90) of BODI-Au-9 (DMSO, 126 MHz, 300K)

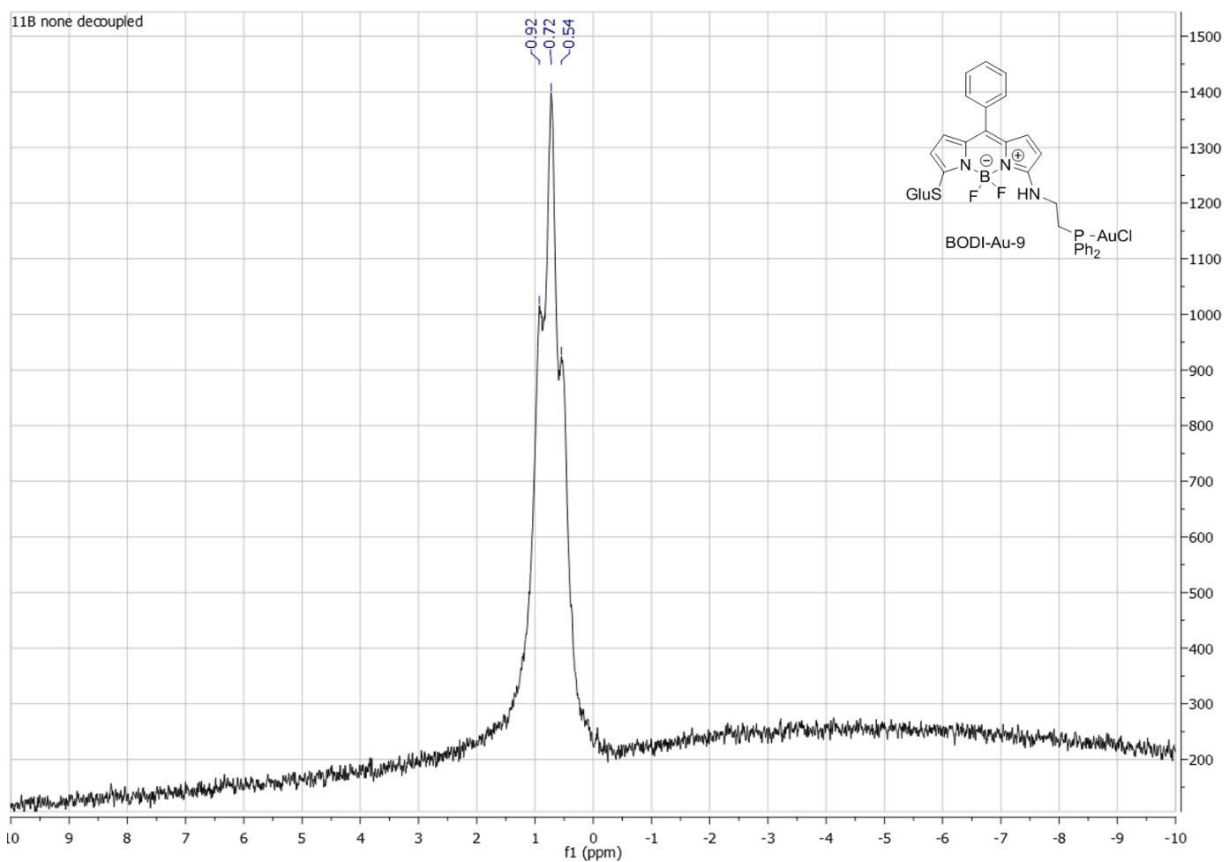

Figure S 51:  $^{11}\text{B}$  NMR of BODI-Au-9 (DMSO, 160 MHz, 300K)

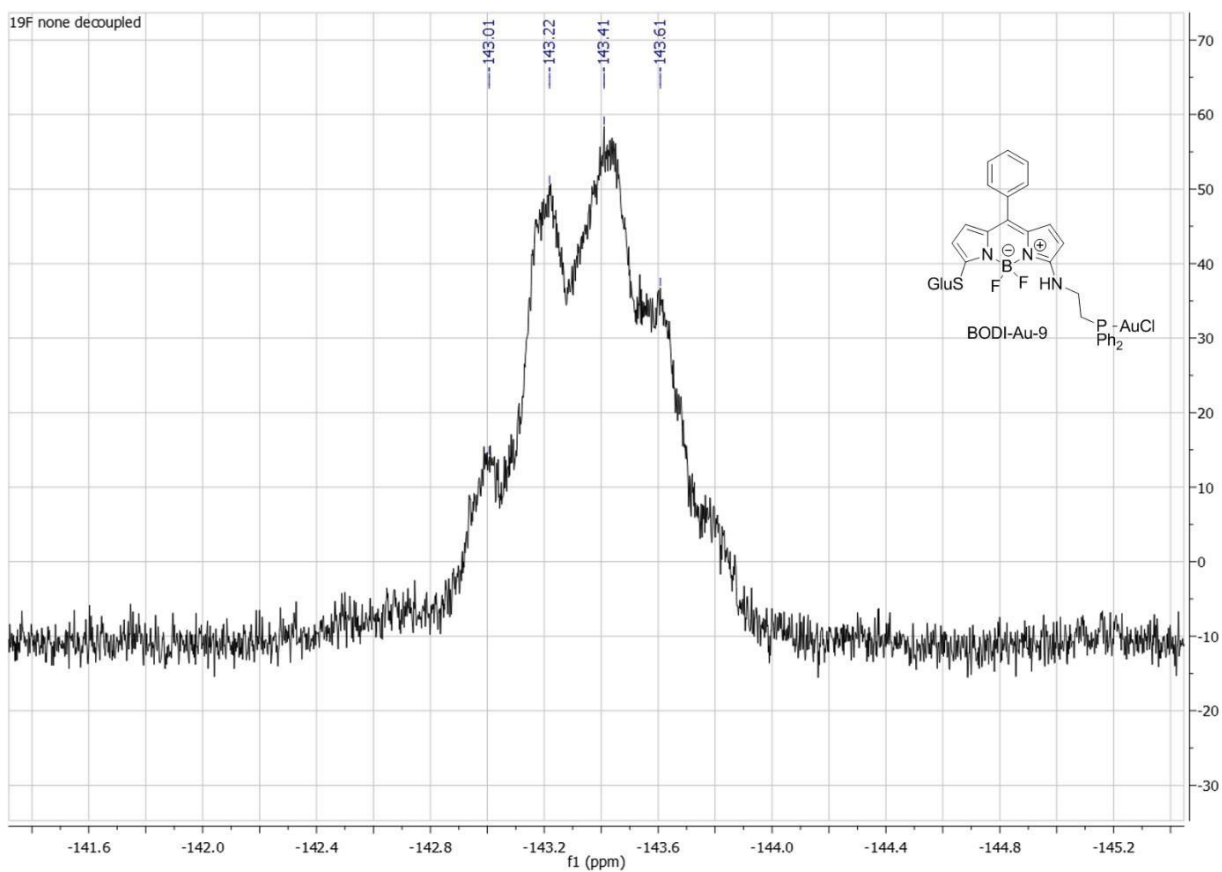

Figure S 52: <sup>19</sup>F NMR of BODI-Au-9 (DMSO, 470 MHz, 300K)

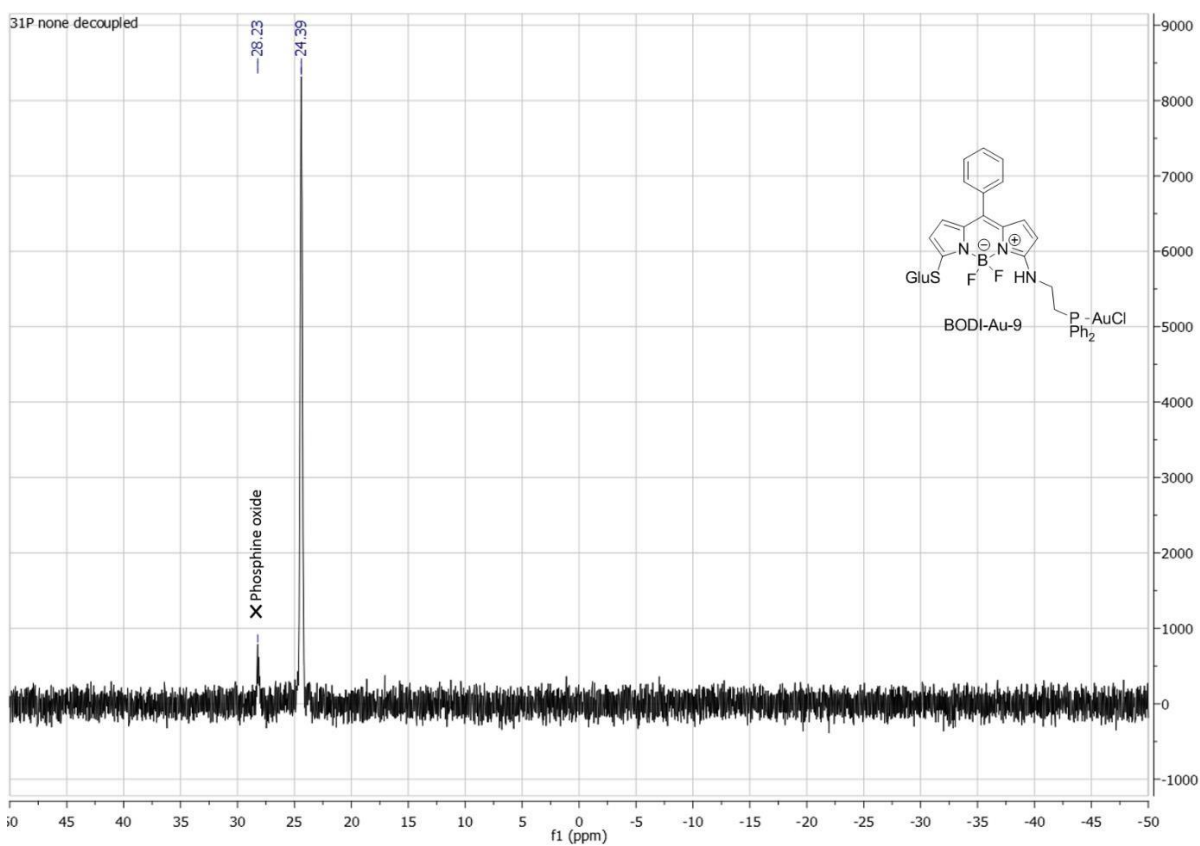

Figure S 53: <sup>31</sup>P NMR of BODI-Au-9 (DMSO, 202 MHz, 300K)

## BODI-Au-10

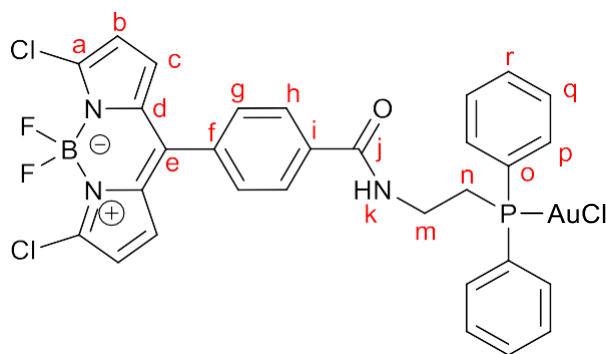

51mg (0.13mmol, 1eq) of BODIPY 3 and 73 mg (50.3mmol, 4eq) of  $K_2CO_3$  were placed in a 50 mL round bottom flask and dissolved in 30 mL dry DCM under argon. 23  $\mu$ L (0.26mmol, 2eq) of oxalyl chloride were added, followed by a droplet of DMF. The resulting mixture was stirred at room temperature for 45min and then evaporated to dryness. The crude acid chloride was redissolved in 10 mL  $CH_2Cl_2$  and 60.4 mg (0.131 mmol, 1eq) of 2-(diphenylphosphino)ethylamine-aurichloride was added. The resulting solution was stirred for 100 min at room temperature, the solvents were evaporated and the crude product purified by column chromatography on silica gel, using  $CH_2Cl_2/MeOH$  (100:0 to 99.2:0.8) as eluent. The solvents were removed under reduced pressure and the product dissolved in a minimal amount of  $CH_2Cl_2$ , followed by precipitation with pentane to yield pure **BODI-Au-10** (60.1mg, 71.5 $\mu$ mol, yield = 55%) as a pink-orange solid.

$^1H$  NMR (500 MHz,  $CDCl_3$ )  $\delta$  (ppm) = 2.96 (dt,  $^3J = 10.6$ ,  $^4J = 6.5$  Hz, 2H,  $H_n$ ), 3.81 (dq,  $^3J = 17.2$ ,  $^3J = 6.4$  Hz, 2H,  $H_m$ ), 6.45 (d,  $^3J = 4.4$  Hz, 2H,  $H_b$ ), 6.80 (d,  $^3J = 4.3$  Hz, 2H,  $H_c$ ), 6.96 (t,  $^3J = 5.8$  Hz, 1H,  $H_k$ ), 7.55–7.46 (m, 8H,  $H_g$ ,  $H_q$ ,  $H_r$ ), 7.71 (ddd,  $J = 13.2$ , 8.0, 1.5 Hz, 4H,  $H_p$ ), 7.90 (d,  $^3J = 8.3$  Hz, 2H,  $H_h$ ).

$^{13}C$  NMR (126 MHz,  $CDCl_3$ )  $\delta$  (ppm) = 28.48 (d,  $J = 38.5$  Hz,  $C_m$ ), 36.60 (d,  $J = 3.5$  Hz,  $C_n$ ), 119.44 (s,  $C_b$ ), 127.47 (s,  $C_c$ ), 128.59 (d,  $J = 61.4$  Hz,  $C_o$ ), 129.67 (d,  $J = 11.8$  Hz,  $C_r$ ), 130.66 (s,  $C$ ), 130.81 (s,  $C_g$ ), 131.63 (s,  $C_h$ ), 132.48 (d,  $J = 2.6$  Hz,  $C_q$ ), 133.36 (d,  $J = 13.3$  Hz,  $C_p$ ), 133.69 (s,  $C_d$ ,  $C_e$ ), 135.70 (s,  $C_i$ ), 142.44 (s,  $C_f$ ), 145.75 (s,  $C_a$ ), 166.72 (s,  $C_j$ ).

$^{11}B$  NMR (160 MHz,  $CDCl_3$ )  $\delta$  (ppm) = 0.46 (t,  $J_{B-F} = 27.7$  Hz).

$^{19}F$  NMR (470 MHz,  $CDCl_3$ )  $\delta$  (ppm) = -148.10 (dd,  $J = 55.6$ , 27.8 Hz).

$^{31}P$  NMR (202 MHz,  $CDCl_3$ )  $\delta$  (ppm) = 23.47.

HR-MS (ESI):  $m/z$  = calculated for  $C_{30}H_{23}Au_1B_1Cl_3F_2N_3O_1P_1Na_1$   $[M+Na]^+$  848.02337; found 828.02495.

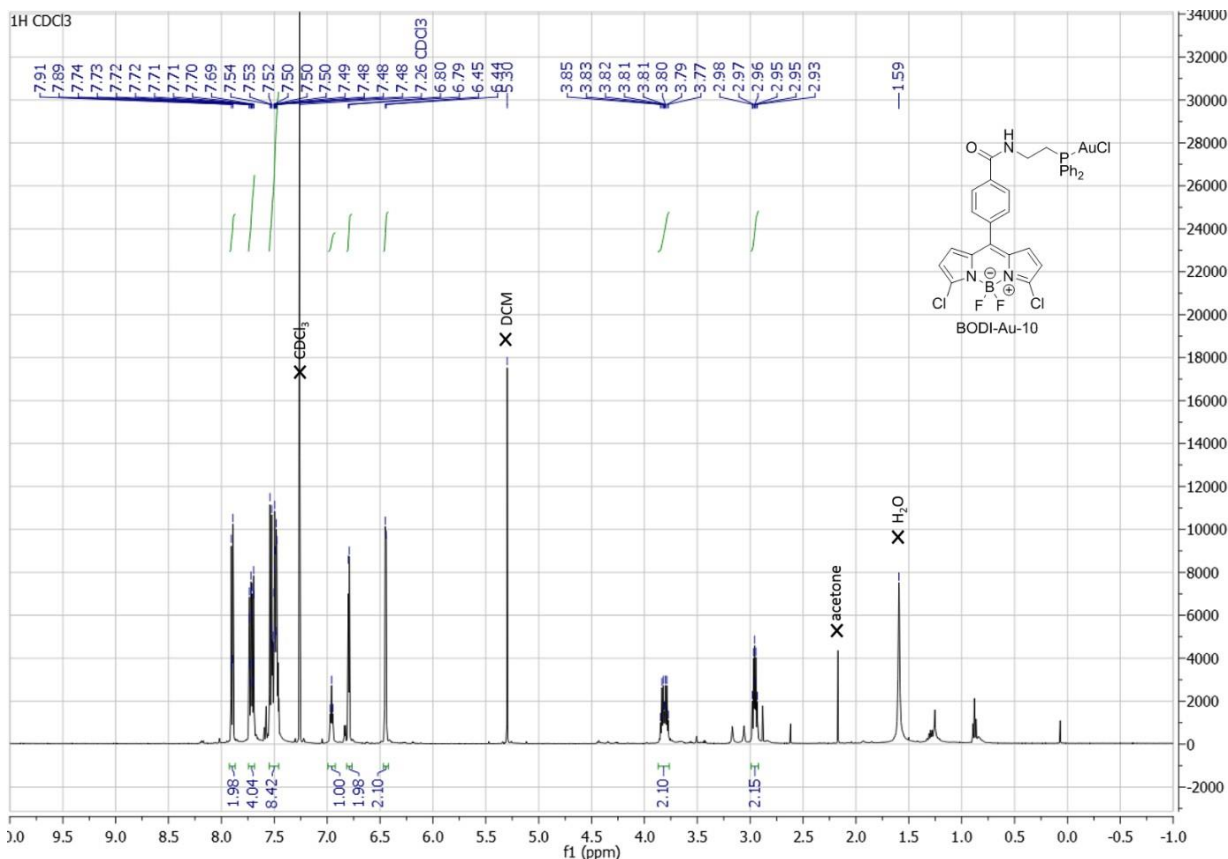

Figure S 54: <sup>1</sup>H NMR of BODI-Au-10 (CDCl<sub>3</sub>, 500 MHZ, 300K)

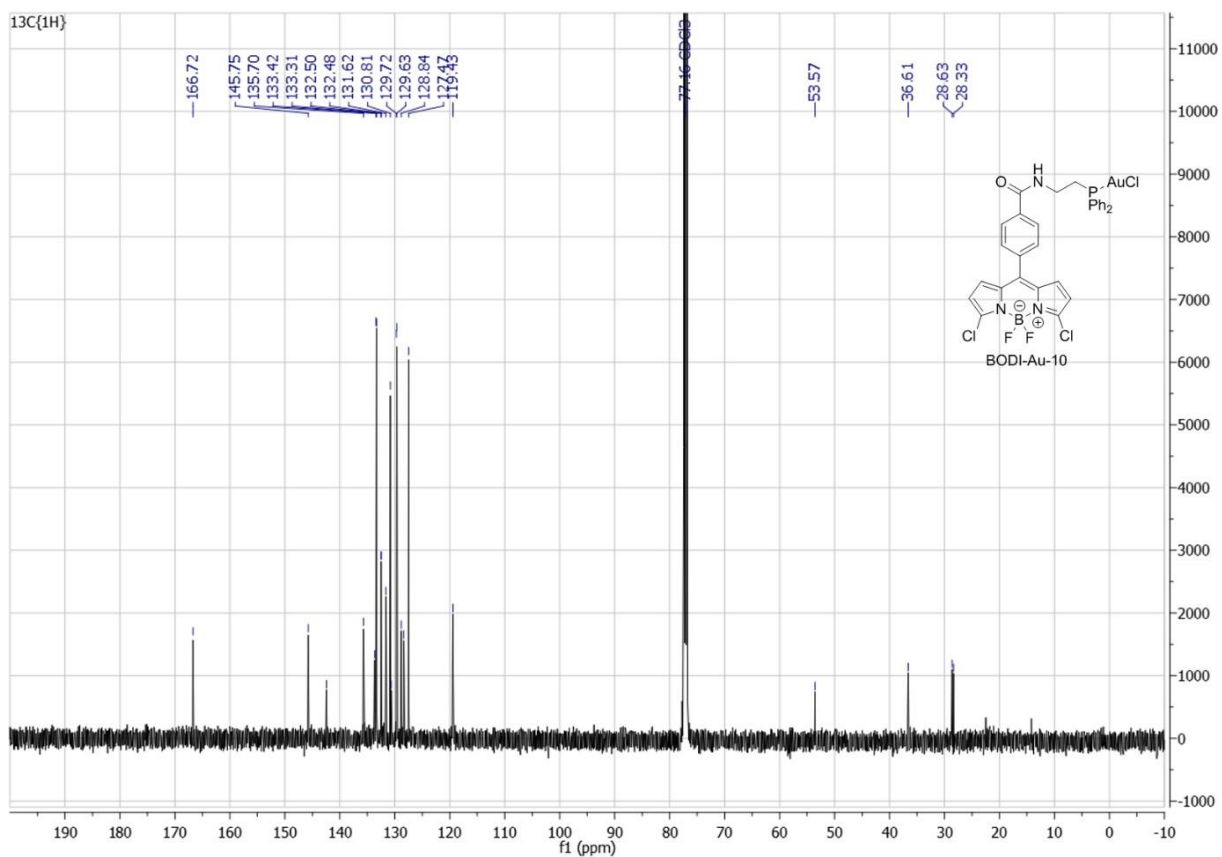

Figure S 55: <sup>13</sup>C NMR of BODI-Au-10 (CDCl<sub>3</sub>, 126 MHZ, 300K)

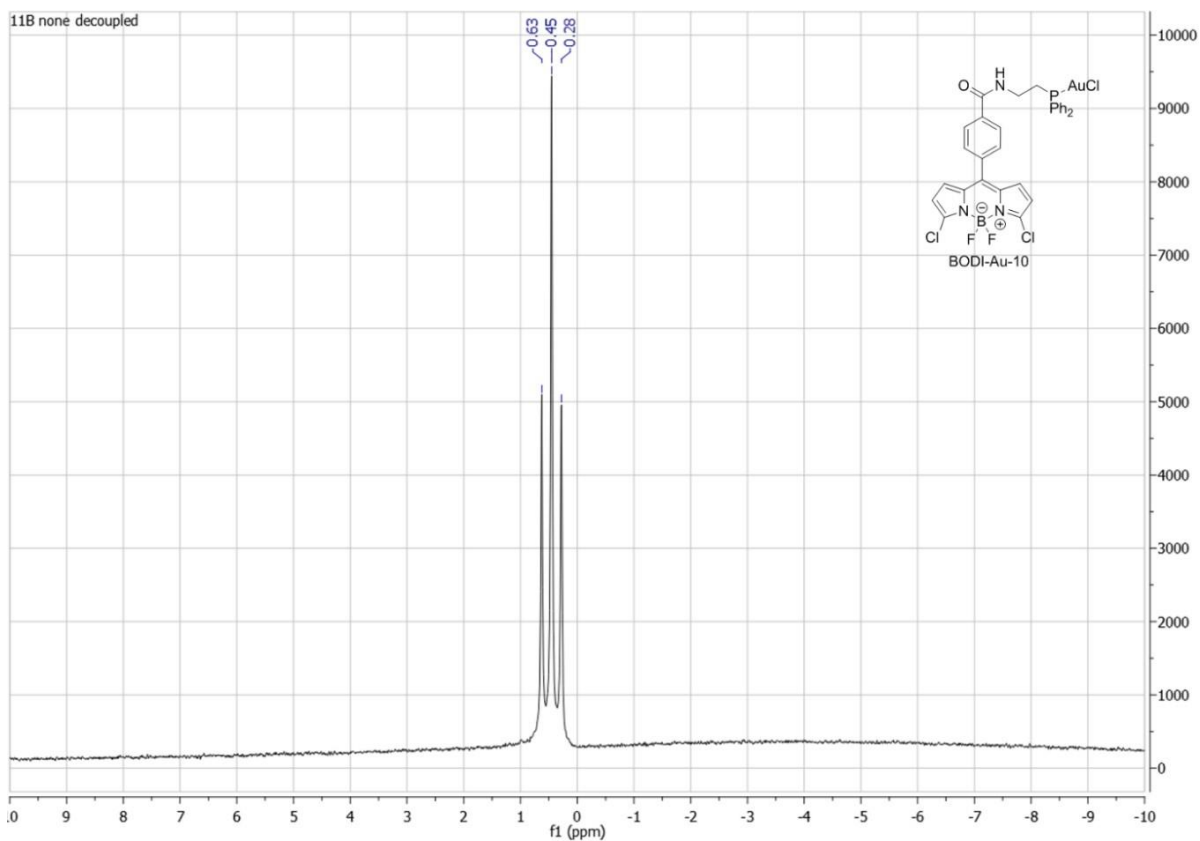

Figure S 56:  $^{11}\text{B}$  NMR of BODI-Au-10 ( $\text{CDCl}_3$ , 160 MHz, 300K)

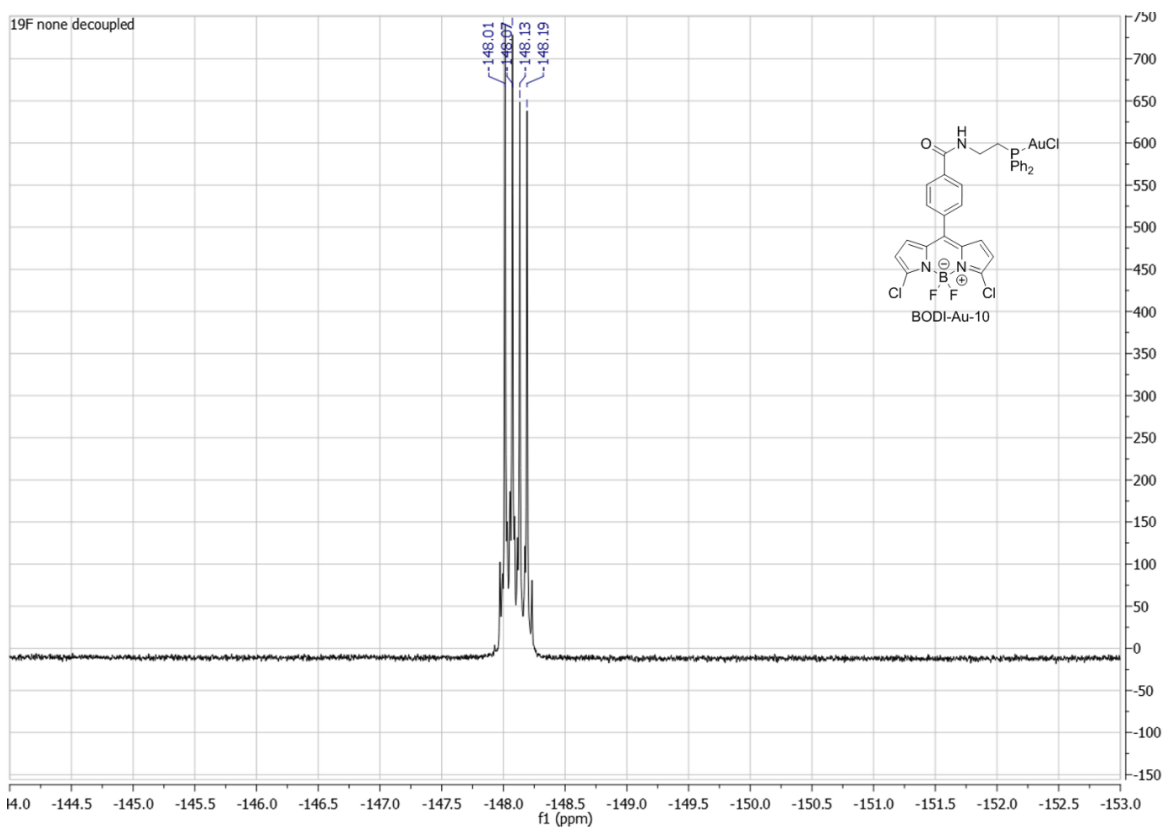

Figure S 57:  $^{19}\text{F}$  NMR of BODI-Au-10 ( $\text{CDCl}_3$ , 470 MHz, 300K)

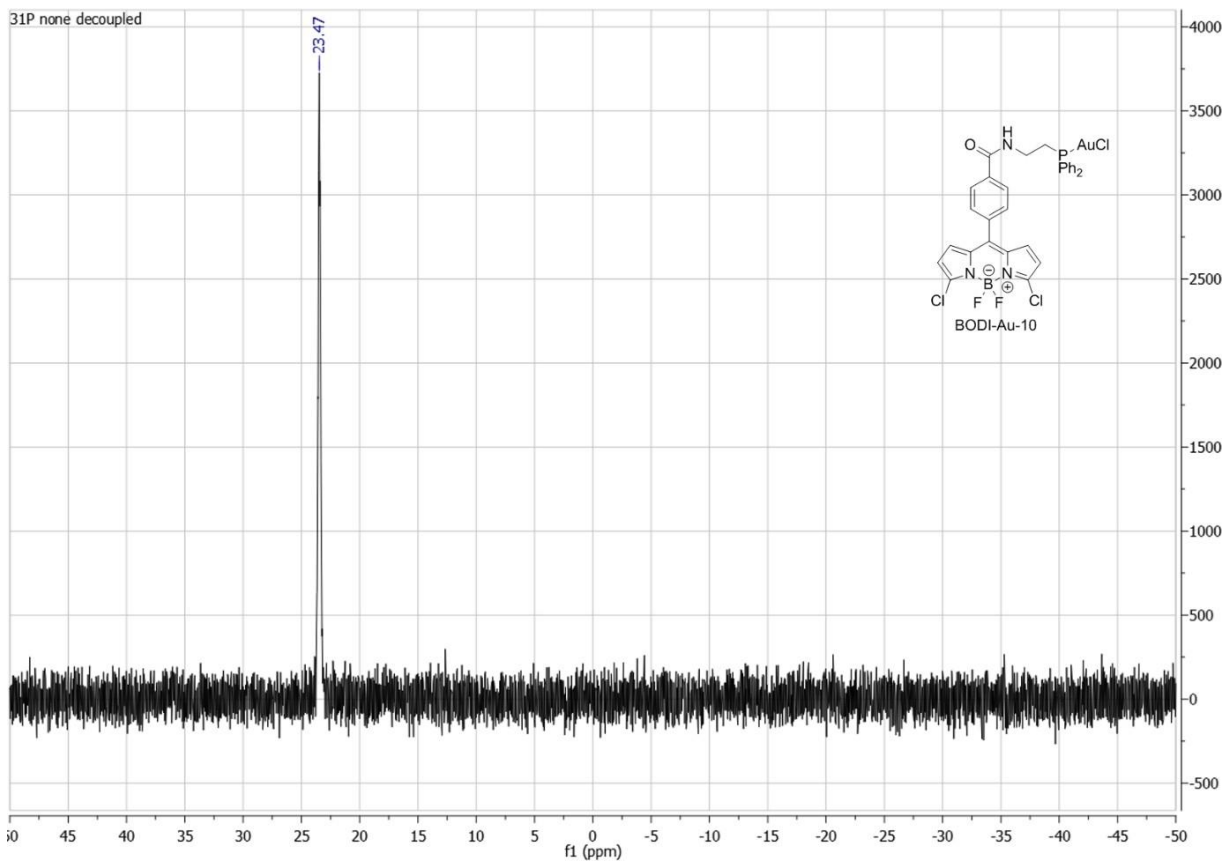

Figure S 58: <sup>31</sup>P NMR of BODI-Au-10 (CDCl<sub>3</sub>, 202 MHz, 300K)

## BODI-Au-11

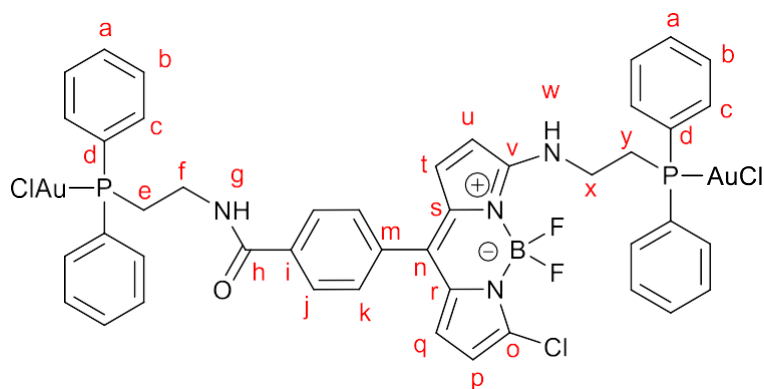

100 mg (0.262mmol, 1 eq) of BODIPY **3** were placed in a round bottom flask and dissolved in 10 mL DCM. 45  $\mu$ L (0.524mmol, 2 eq) oxalylchloride were added, followed by a droplet of DMF. The reaction was stirred at room temperature for 1h before evaporation to dryness. The solid was redissolved in 10 mL THF. 181mg (1.31mmol, 5eq) of  $K_2CO_3$  and 254mg (0.551mmol, 2.1eq) of 2-(diphenylphosphino)ethylamine-aurichloride were added and the reaction refluxed for 80 min. Upon total consumption of the BODIPY starting material the solvents were evaporated and the product was purified by column chromatography on silica gel, using as eluent  $CH_2Cl_2/MeOH$  (99:1). The product fractions were collected, and evaporated to dryness. The product was dissolved in a minimal amount of  $CH_2Cl_2$  and crushed out with pentane twice to yield **BODI-Au-11** (305mg, 243.66  $\mu$ mol, yield = 93%) as an orange powder.

$^1H$  NMR (500 MHz, DMSO- $D_6$ )  $\delta$  (ppm)= 3.09 (dt,  $J$  = 11.0, 7.0 Hz, 2H,  $H_y$ ), 3.17 (dd,  $J$  = 15.9, 11.4 Hz, 2H,  $H_e$ ), 3.58 (dt,  $J$  = 20.3, 6.7 Hz, 2H,  $H_x$ ), 3.80–3.65 (m, 2H,  $H_f$ ), 6.20 (d,  $J$  = 3.9 Hz, 1H,  $H_u$ ), 6.26 (d,  $J$  = 3.8 Hz, 1H,  $H_t$ ), 6.65–6.59 (m, 1H,  $H_p$ ), 6.96 (t,  $J$  = 5.6 Hz, 1H,  $H_q$ ), 7.50 (d,  $J$  = 8.3 Hz, 2H,  $H_k$ ), 7.63–7.53 (m, 12H,  $H_{a,b}$ ), 7.85–7.77 (m, 8H,  $H_c$ ), 7.89 (d,  $J$  = 8.3 Hz, 2H,  $H_j$ ), 8.70–8.62 (m, 1H,  $H_w$ ), 8.86 (t,  $J$  = 5.6 Hz, 1H,  $H_g$ ).

$^{13}C$  NMR (126 MHz, DMSO- $D_6$ )  $\delta$  (ppm)= 26.4 (d,  $J$  = 37.7 Hz,  $C_f$ ), 27.4 (d,  $J$  = 39.3 Hz,  $C_x$ ), 35.8 (d,  $J$  = 6.2 Hz,  $C_e$ ), 41.3 (d,  $J$  = 10.6 Hz,  $C_y$ ), 111.9 (s,  $C_p$ ), 114.8 (s,  $C_u$ ), 117.3 (s,  $C_q$ ), 126.1 (s,  $C_r$ ,  $C_s$ ), 127.4 (s,  $C_j$ ), 128.9 (d,  $J$  = 60.8 Hz,  $C_d$ ), 129.0 (s,  $C_n$ ), 129.7 (s,  $C_t$ ), 129.4 (dd,  $J$  = 11.7, 3.5 Hz,  $C_a$ ), 130.0 (s,  $C_k$ ), 130.8 (s,  $C_i$ ), 132.1 (dd,  $J$  = 15.5, 2.1 Hz,  $C_b$ ), 133.2 (dd,  $J$  = 13.4, 3.5 Hz,  $C_c$ ), 133.8 (s,  $C_m$ ), 134.4 (s,  $C_o$ ), 136.1 (s,  $C_v$ ), 161.7 (s,  $C_h$ ).

$^{11}B$  NMR (160 MHz, DMSO- $D_6$ )  $\delta$  (ppm)= 0.66 (t,  $J$  = 32.5 Hz).

$^{19}F$  NMR (470 MHz, DMSO- $D_6$ )  $\delta$  (ppm)= -144.40 (dd,  $J$  = 64.4, 31.2 Hz).

$^{31}P$  NMR (202 MHz, DMSO- $D_6$ )  $\delta$  (ppm)= 24.52 – 24.13 (m), 25.35 – 24.84 (m).

$^{31}P$   $\{^1H\}$  NMR (1H decoupled) (202 MHz, DMSO- $D_6$ )  $\delta$  (ppm) = 24.33, 25.09.

HR-MS (ESI):  $m/z$  = calculated for  $C_{44}H_{38}Au_2B_1Cl_3F_2N_4O_1P_2Na_1[M+Na]^+$  1273.08413; found 1273.08874.



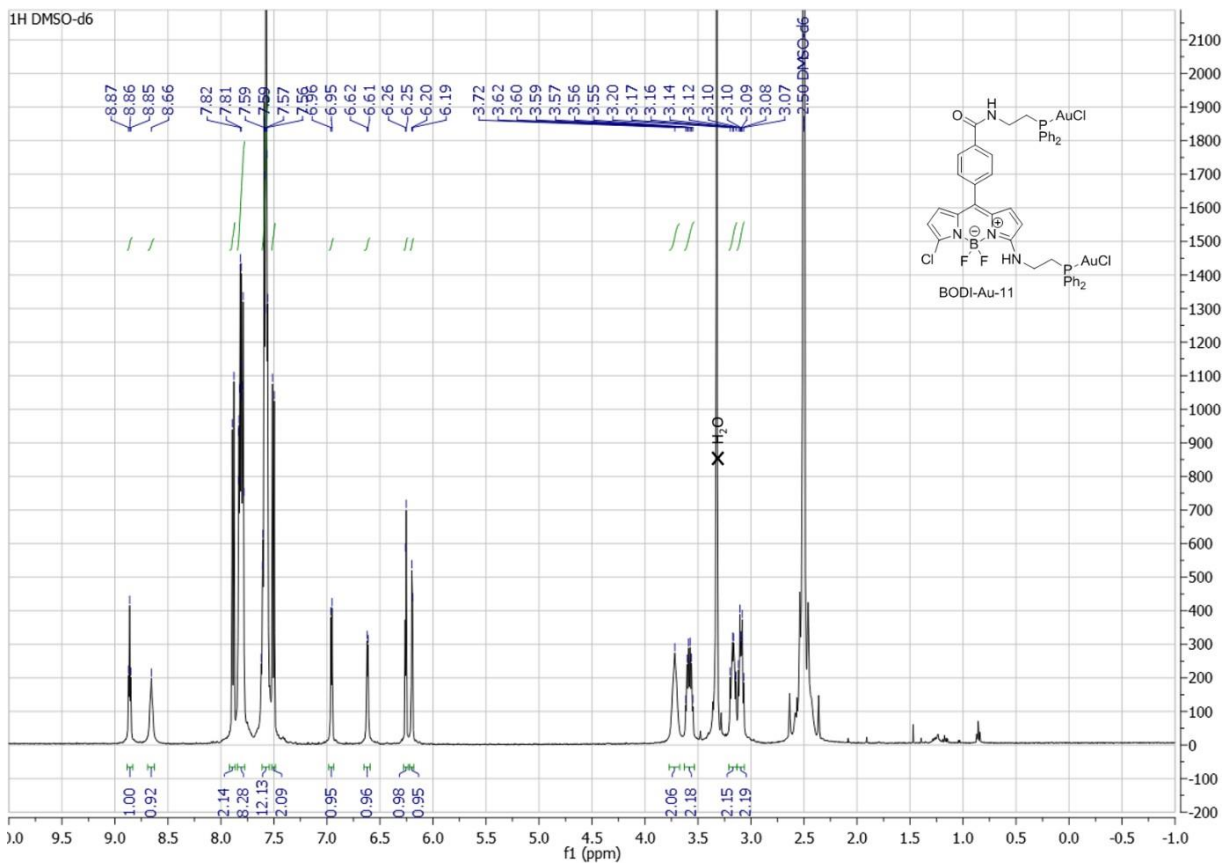

Figure S 59: <sup>1</sup>H NMR of BODI-Au-11 (DMSO, 500 MHz, 300K)

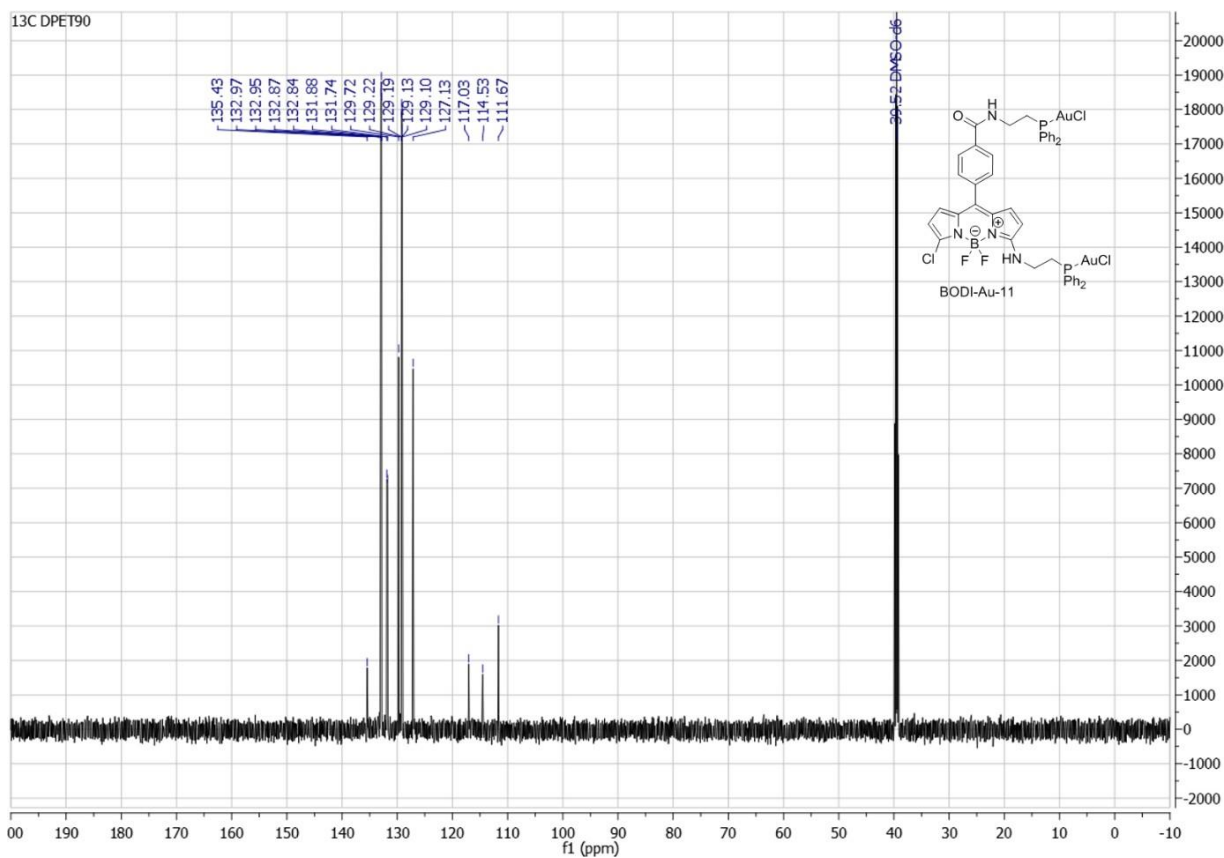

Figure S 60: <sup>13</sup>C NMR (DEPT90) of BODI-Au-11 (DMSO, 126 MHz, 300K)

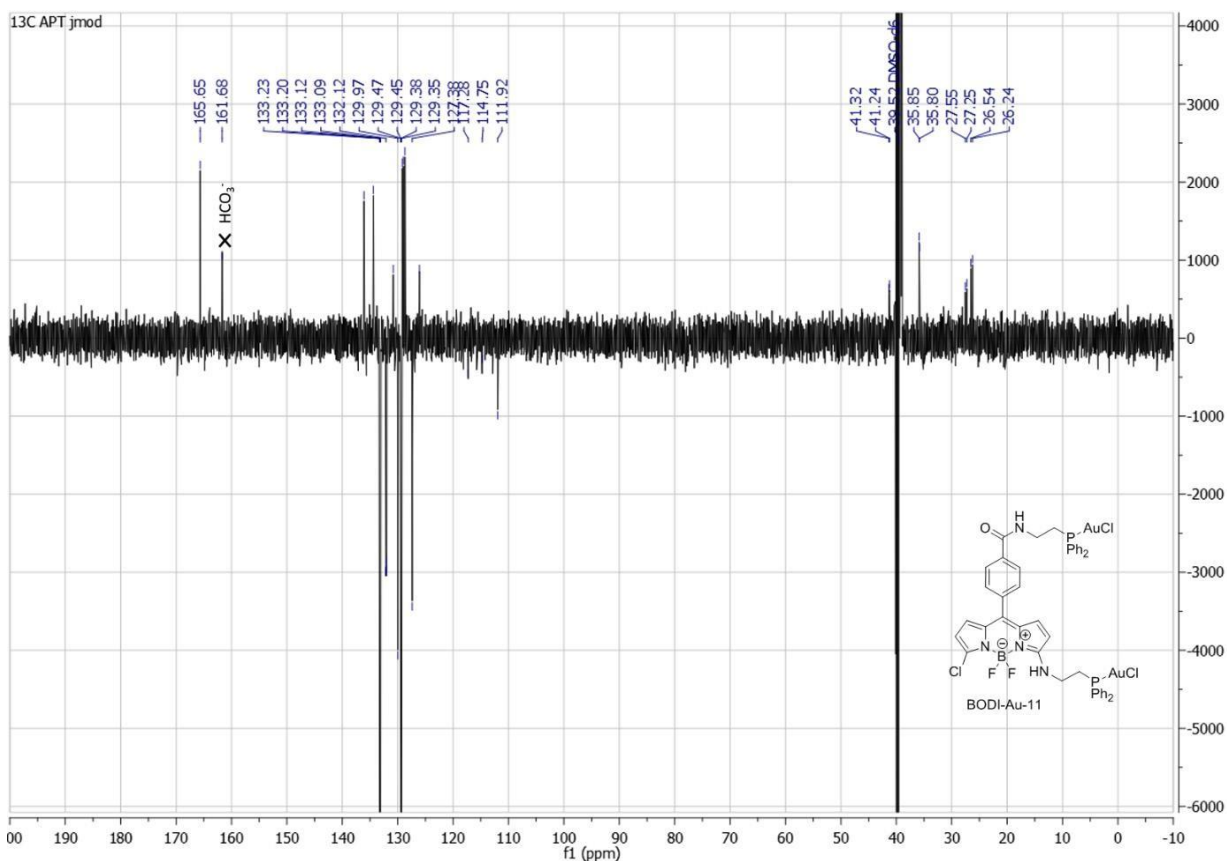

Figure S 61: <sup>13</sup>C NMR (APT jmod) of BODI-Au-11 (DMSO, 126 MHz, 300K)

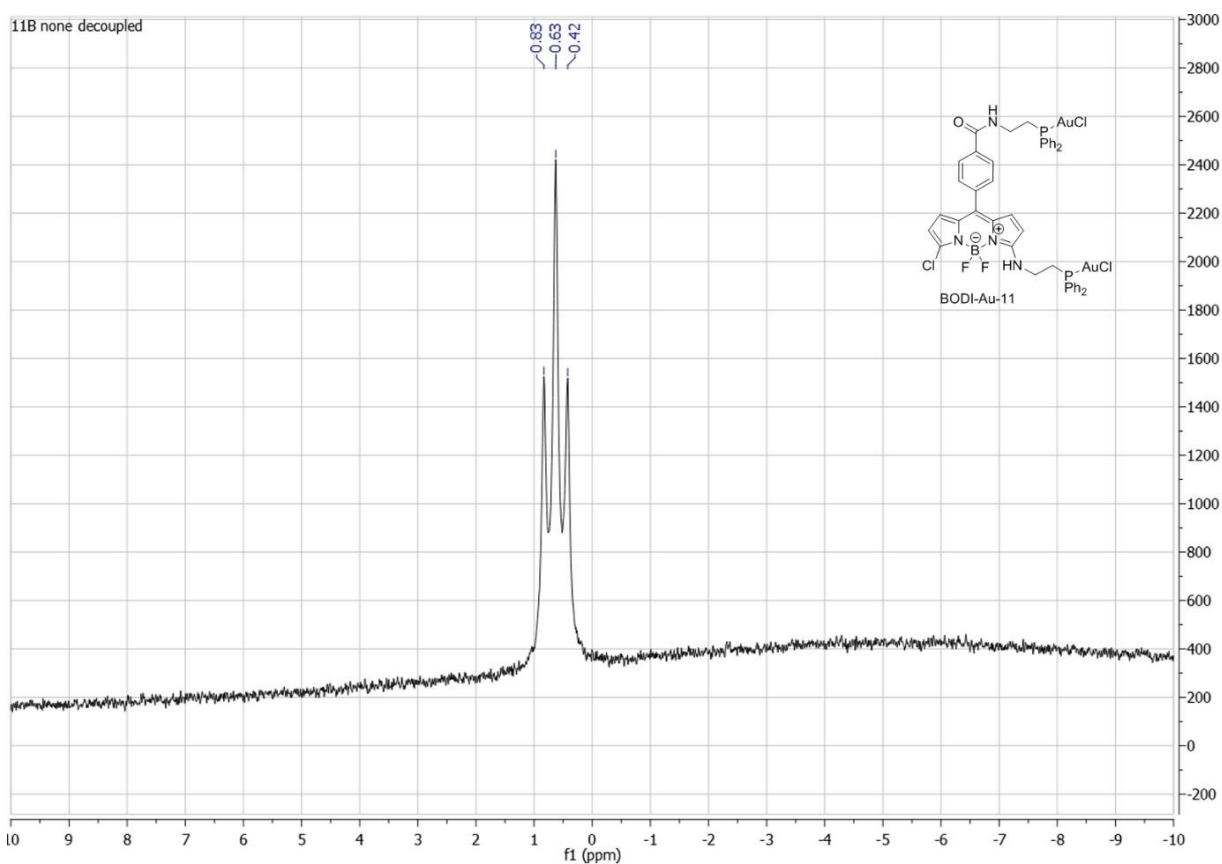

Figure S 62: <sup>11</sup>B NMR of BODI-Au-11 (DMSO, 160 MHz, 300K)

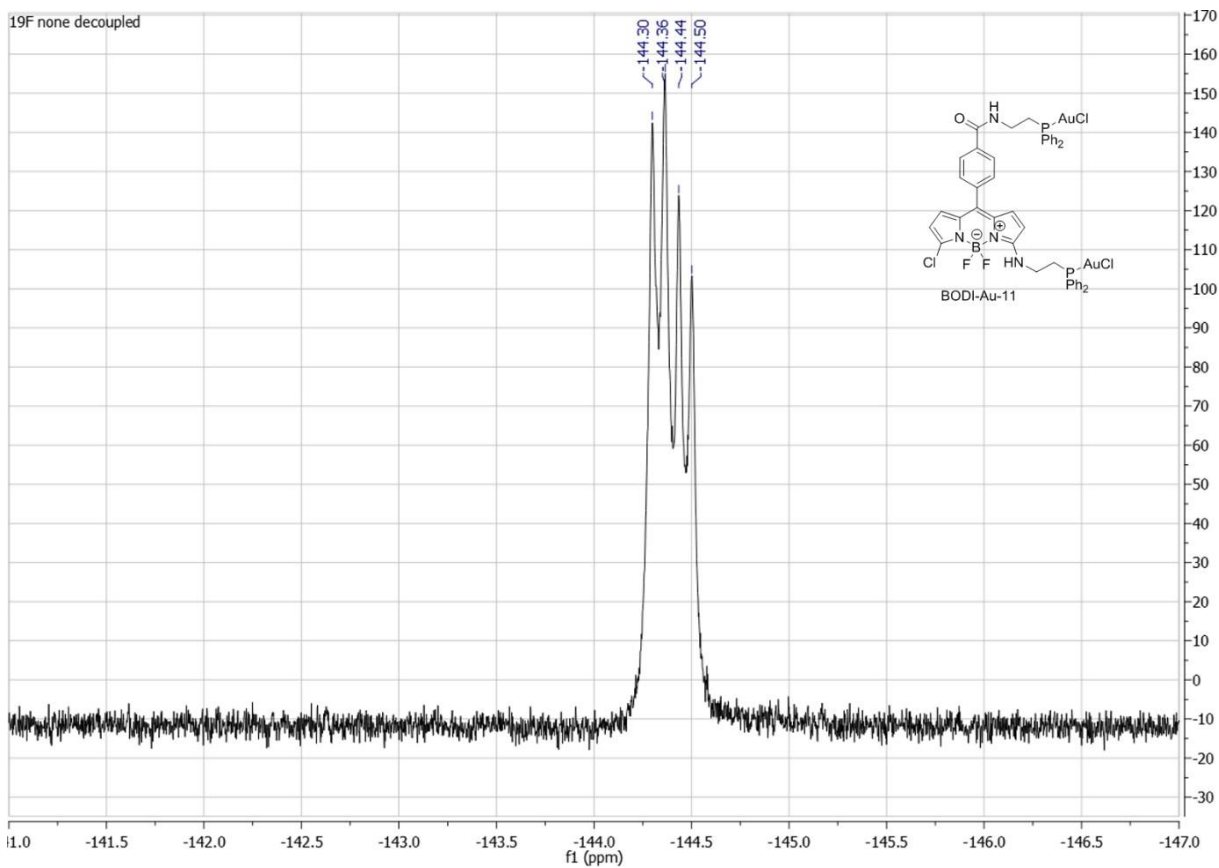

Figure S 63:  $^{19}\text{F}$  NMR of BODI-Au-11 (DMSO, 470 MHz, 300K)

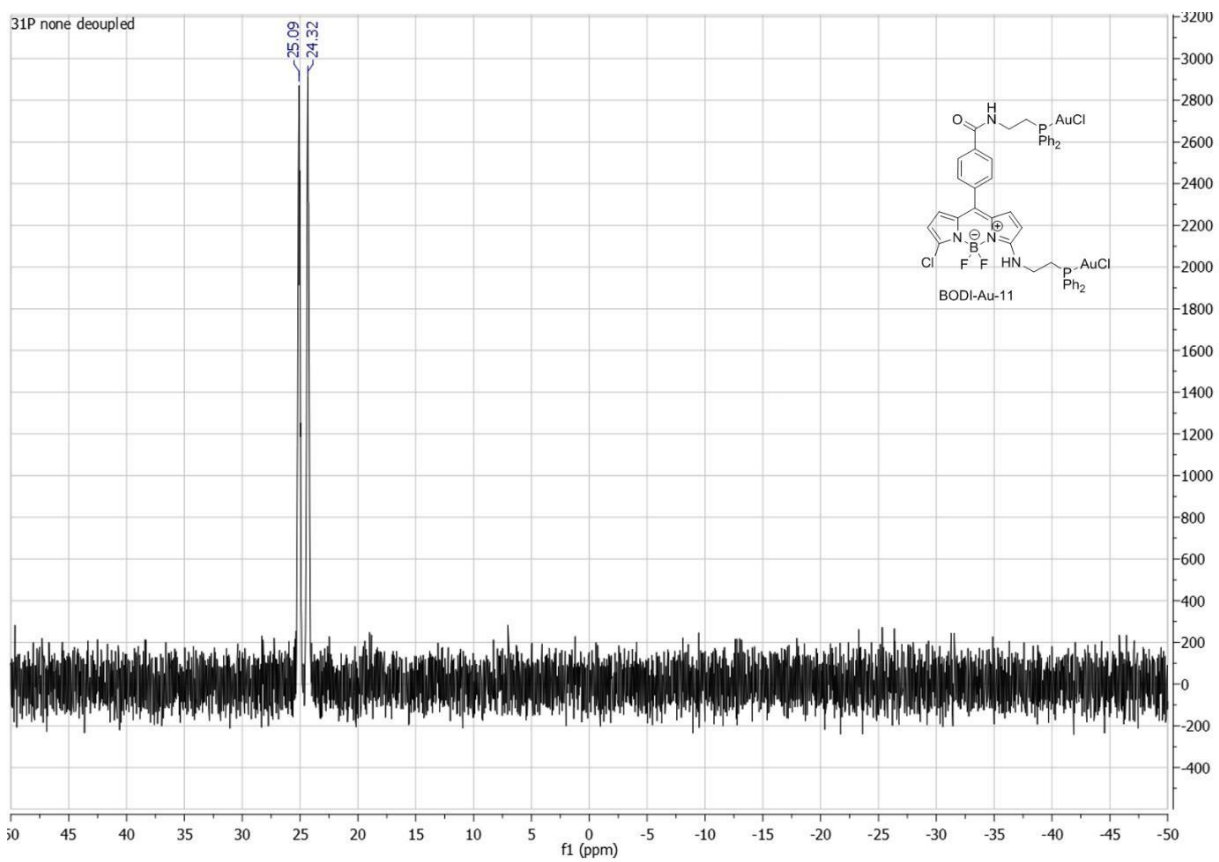

Figure S 64:  $^{31}\text{P}$  NMR of BODI-Au-11 (DMSO, 202 MHz, 300K)

## BODI-Au-12

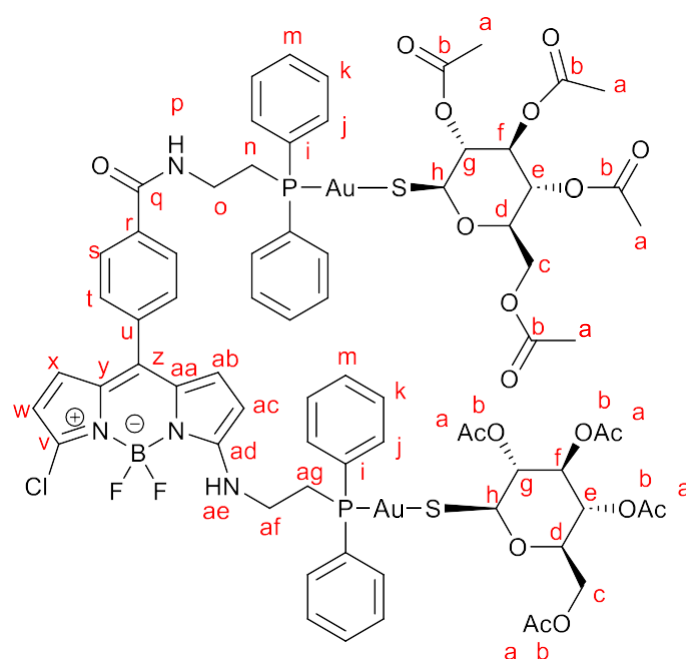

26,2mg (72 $\mu$ mol)  $\beta$ -thioglucose-tetraacetate (1 eq) was dissolved in acetone (1 mL). 72 $\mu$ L 1M NaOH 1M NaOH (1 eq) was added and the resulting solution stirred for 15 min. 45mg (36 $\mu$ mol) of **BODI-Au-11** was placed in a separate roundbottom flask and dissolved in acetone (5 mL). The thioglucose solution was added at once and the reaction stirred for 30 min at room temperature. The solvents were evaporated, CH<sub>2</sub>Cl<sub>2</sub> (10 mL) was added, and the supernatant separated and evaporated. The resulting crude product was dissolved in a minimal amount of CH<sub>2</sub>Cl<sub>2</sub> and precipitated with pentane to obtain the pure target compound as an orange powder (62mg, 32.4  $\mu$ mol, yield = 90%).

<sup>1</sup>H NMR (500 MHz, DMSO-D<sub>6</sub>)  $\delta$  (ppm) = 1.84 (s, 6H, H<sub>a</sub>), 1.88 (s, 6H, H<sub>a</sub>), 1.96 (s, 6H, H<sub>a</sub>), 1.97 (s, 6H, H<sub>a</sub>), 3.20 - 2.99 (m, 4H, H<sub>ag</sub>, H<sub>n</sub>), 3.60 (dt,  $J$  = 12.7, 6.9 Hz, 2H, H<sub>o</sub>), 3.76 (s, 2H, H<sub>af</sub>), 3.99 (dt,  $J$  = 5.6, 2.6 Hz, 4H, H<sub>c</sub>, H<sub>d</sub>), 4.08 (dd,  $J$  = 12.7, 5.7 Hz, 2H, H<sub>c</sub>), 4.90 (dt,  $J$  = 18.8, 9.6 Hz, 4H, H<sub>g</sub>, H<sub>e</sub>), 5.19 (t,  $J$  = 9.5 Hz, 2H, H<sub>f</sub>), 5.33 (d,  $J$  = 9.4 Hz, 2H, H<sub>h</sub>), 6.21 (d,  $J$  = 3.8 Hz, 1H, H<sub>ac</sub>), 6.26 (d,  $J$  = 3.8 Hz, 1H, H<sub>ab</sub>), 6.63 (d,  $J$  = 5.1 Hz, 1H, H<sub>w</sub>), 6.97 (d,  $J$  = 5.1 Hz, 1H, H<sub>x</sub>), 7.50 (d,  $J$  = 8.3 Hz, 2H, H<sub>s</sub>), 7.61 - 7.54 (m, 12H, H<sub>k,m</sub>), 7.92 - 7.81 (m, 10H, H<sub>j</sub>, H<sub>s</sub>), 8.65 (t,  $J$  = 6.4 Hz, 1H, H<sub>ae</sub>), 8.81 (t,  $J$  = 5.5 Hz, 1H, H<sub>p</sub>).

<sup>13</sup>C NMR (126 MHz, DMSO-D<sub>6</sub>)  $\delta$  (ppm) = 20.3 (s, C<sub>a</sub>), 20.3 (s, C<sub>a</sub>), 20.4 (s, C<sub>a</sub>), 20.8 (s, C<sub>a</sub>), 26.5 (d,  $J$  = 34.1 Hz, C<sub>o</sub>), 27.4 (s, C<sub>af</sub>), 35.8 (d,  $J$  = 8.0 Hz, C<sub>n</sub>), 41.3 (d,  $J$  = 10.2 Hz, C<sub>ag</sub>), 62.4 (s, C<sub>c</sub>), 68.6 (s, C<sub>e</sub>), 73.2 (s, C<sub>f</sub>), 74.3 (s, C<sub>g</sub>), 77.4 (s, C<sub>d</sub>), 81.8 (s, C<sub>h</sub>), 111.9 (s, C<sub>w</sub>), 114.5 (s, C<sub>ac</sub>), 117.3 (s, C<sub>x</sub>), 126.1 (s, C<sub>y</sub>, C<sub>aa</sub>), 127.3 (s, C<sub>ab</sub>), 127.4 (s, C<sub>r</sub>), 129.3 (d,  $J$  = 11.1 Hz, C<sub>m</sub>), 129.9 (d,  $J$  = 56.6 Hz, C<sub>i</sub>), 130.0 (s, C<sub>s</sub>), 130.8 (s, C<sub>z</sub>), 132.0 - 131.5 (m, C<sub>k</sub>), 133.3 - 133.0 (m, C<sub>j</sub>), 133.4 (s, C<sub>t</sub>), 133.7 (s, C<sub>u</sub>), 134.4 (s, C<sub>v</sub>), 136.1 (s, C<sub>ad</sub>), 161.6 (s, C<sub>q</sub>), 165.6 (s, CHCO<sub>3</sub><sup>-</sup>), 169.1 (s, C<sub>b</sub>), 169.3 (s, C<sub>b</sub>), 169.5 (s, C<sub>b</sub>), 170.0 (s, C<sub>b</sub>).

<sup>11</sup>B NMR (160 MHz, DMSO-D<sub>6</sub>)  $\delta$  (ppm) = 0.62 (t,  $J$  = 32.4 Hz).

<sup>19</sup>F NMR (470 MHz, DMSO-D<sub>6</sub>)  $\delta$  (ppm) = -144.45 (dd,  $J$  = 64.6, 30.5 Hz).

<sup>31</sup>P NMR (202 MHz, DMSO-D<sub>6</sub>)  $\delta$  (ppm) = 29.66.

HR-MS (ESI):  $m/z$  = calculated for C<sub>72</sub>H<sub>76</sub>Au<sub>2</sub>B<sub>1</sub>Cl<sub>1</sub>F<sub>2</sub>N<sub>4</sub>O<sub>19</sub>P<sub>2</sub>S<sub>2</sub>Na<sub>1</sub> [M+Na]<sup>+</sup> 1927.30049; found 1927.30492.

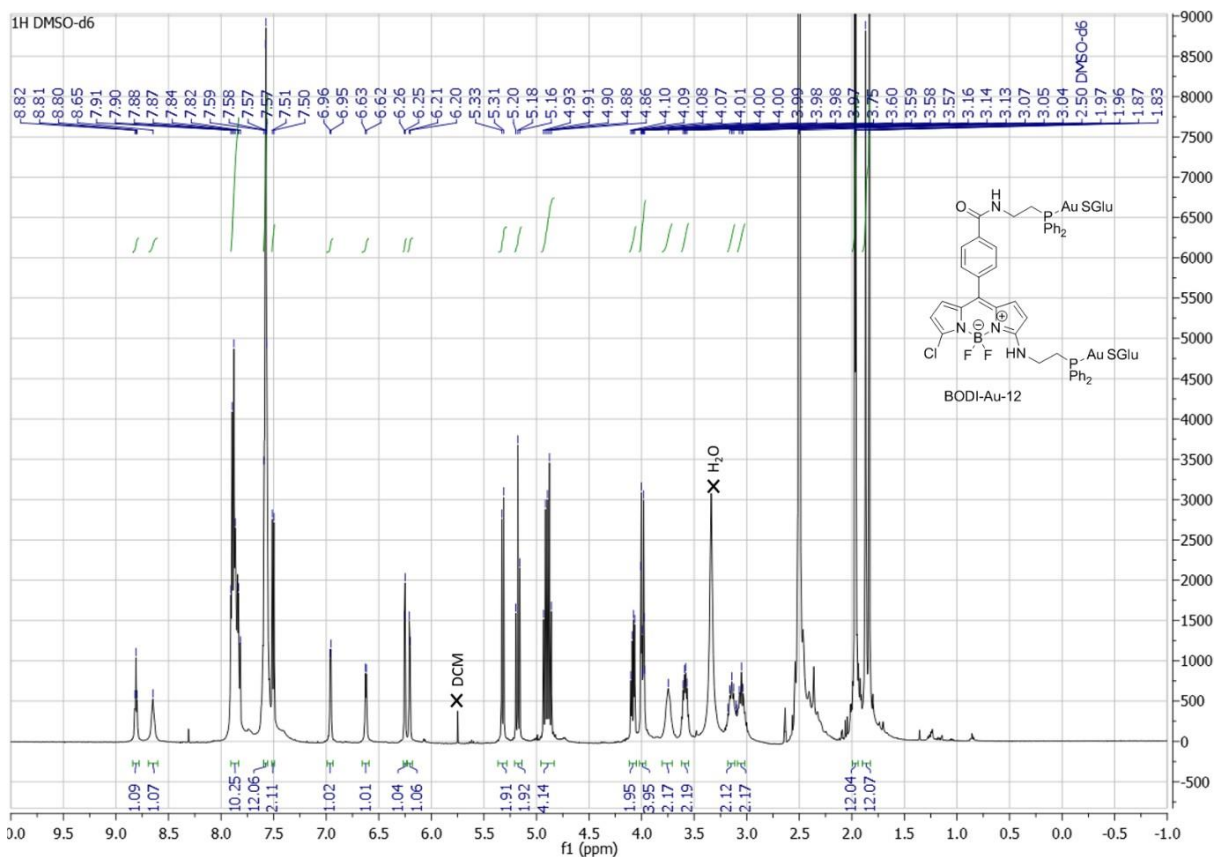

Figure S 65:  $^1\text{H}$  NMR of BODI-Au-12 (DMSO, 500 MHz, 300K)

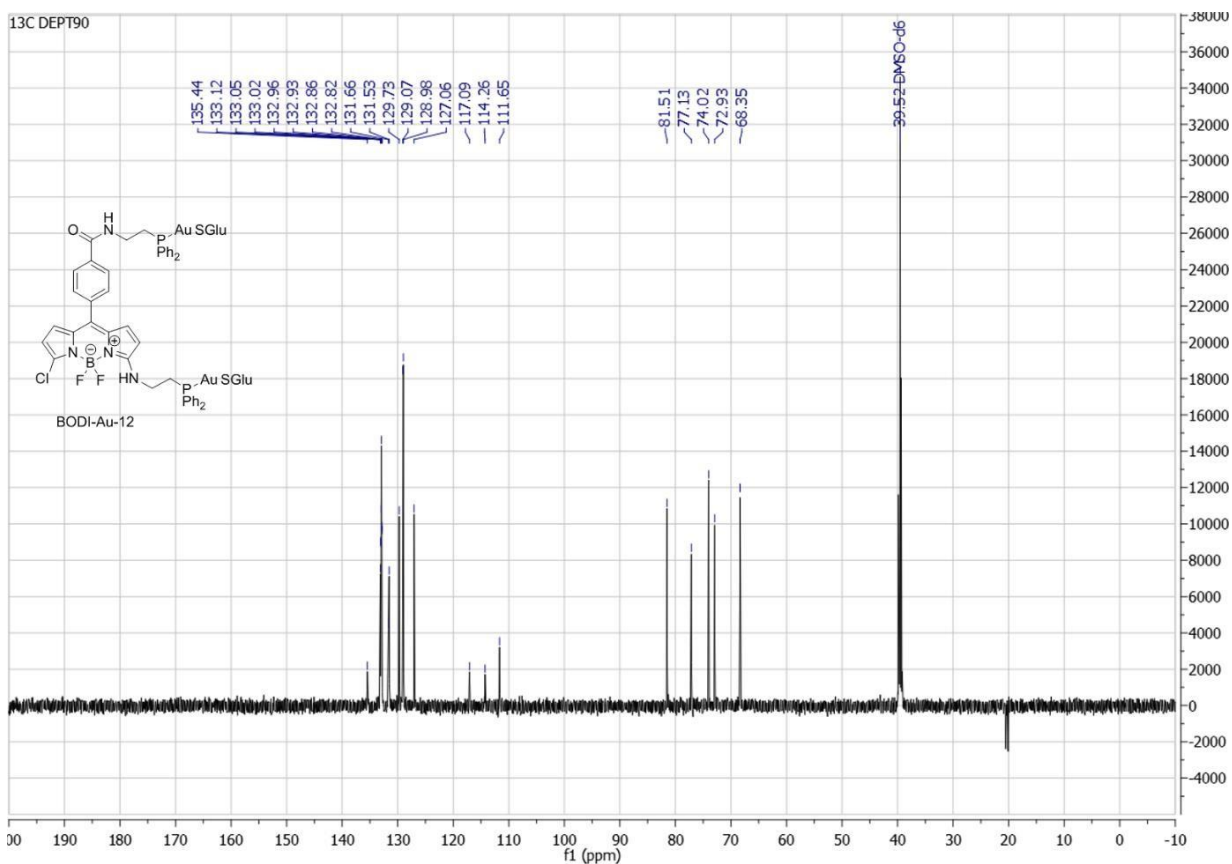

Figure S 66:  $^{13}\text{C}$  NMR (DEPT90) of BODI-Au-12 (DMSO, 126 MHz, 300K)

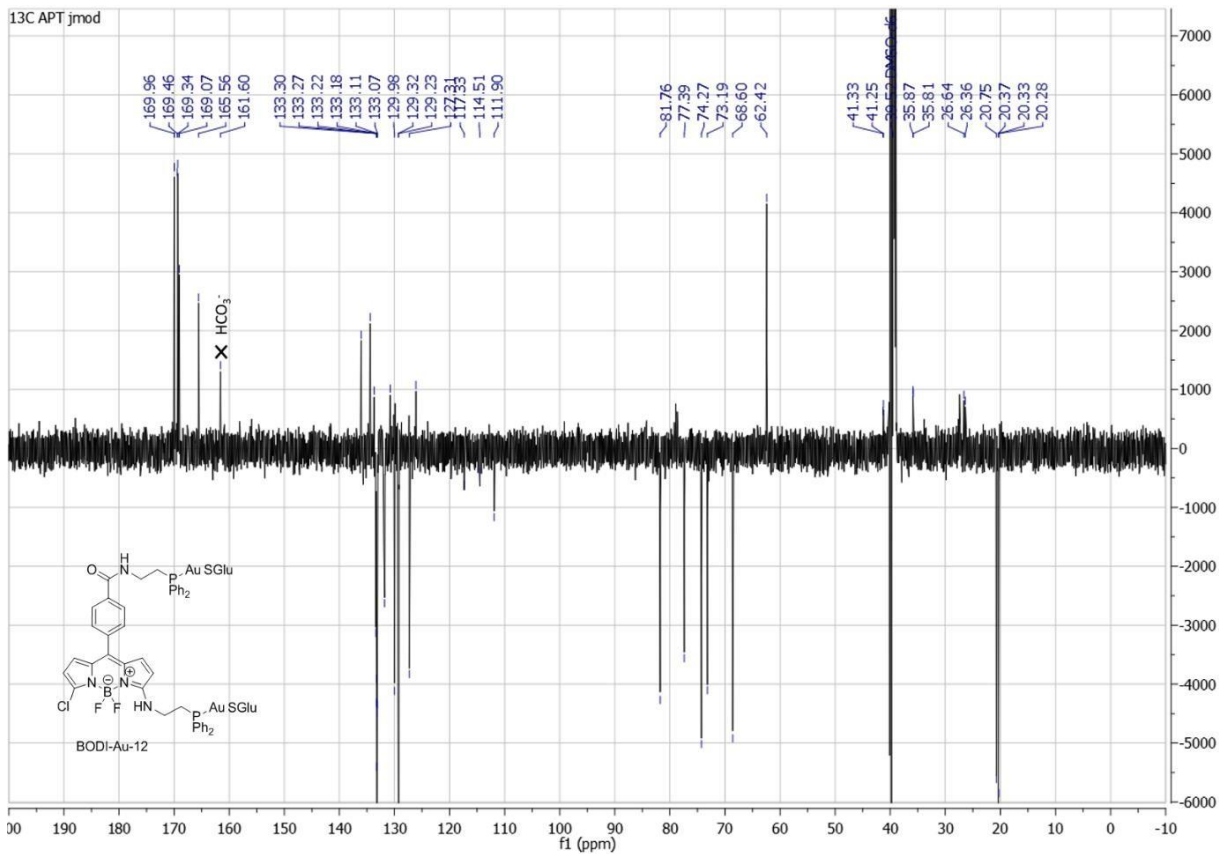

Figure S 67:  $^{13}\text{C}$  NMR (APT jmod) of BODI-Au-12 (DMSO, 126 MHz, 300K)

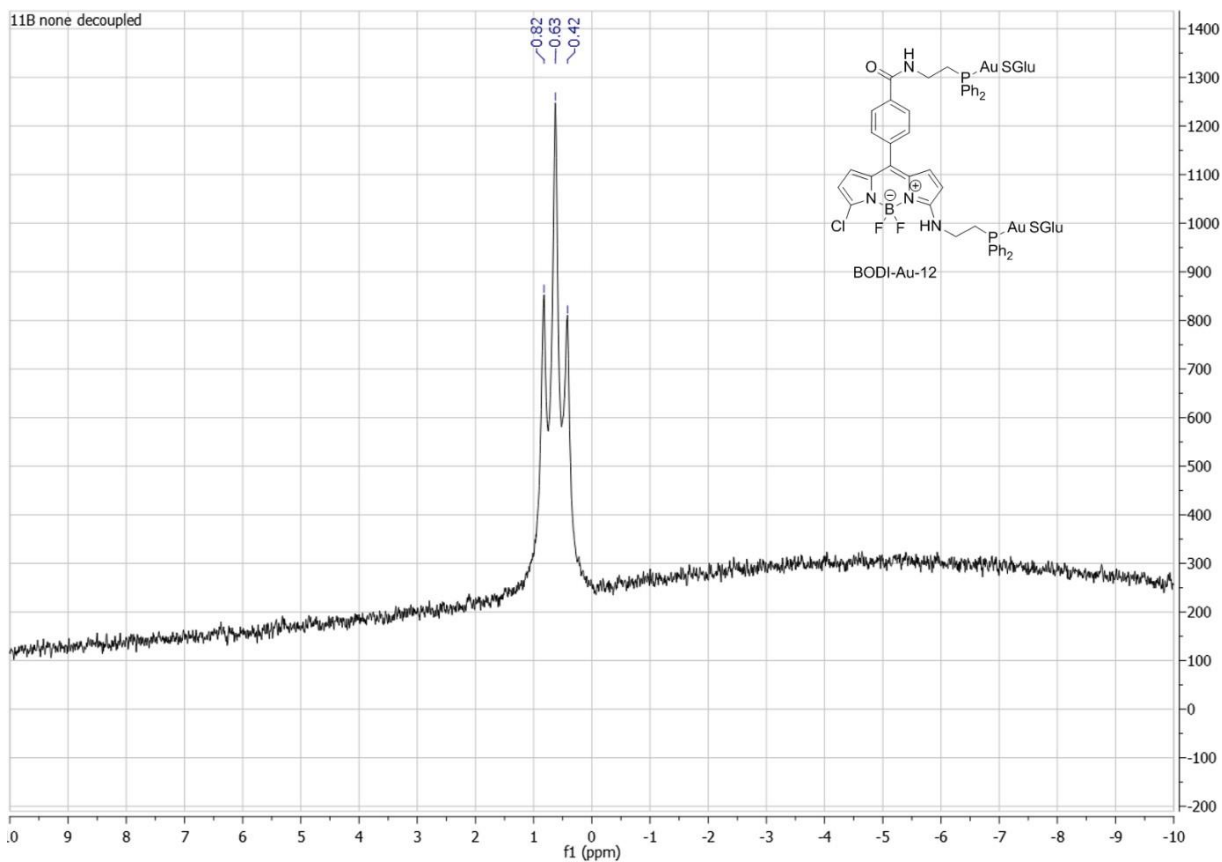

Figure S 68:  $^{11}\text{B}$  NMR of BODI-Au-12 (DMSO, 160 MHz, 300K)

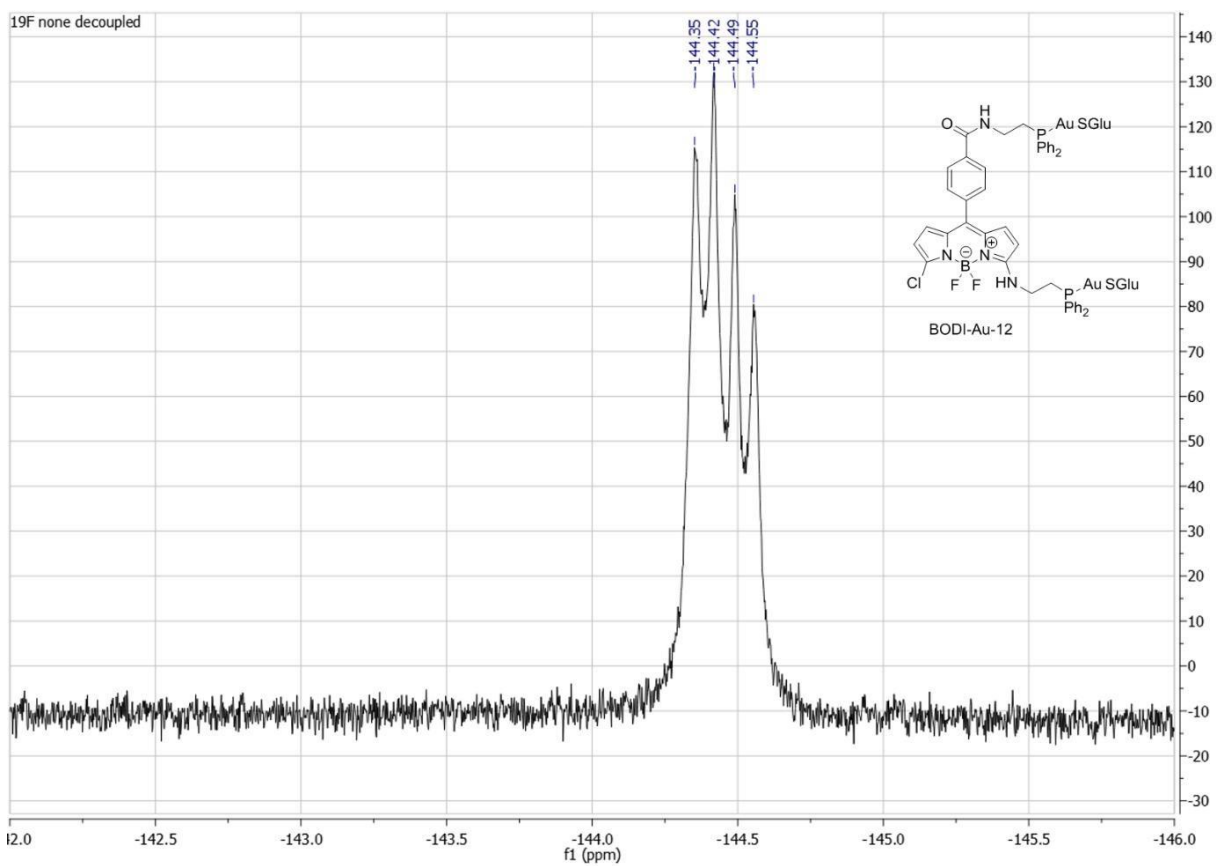

Figure S 69:  $^{19}\text{F}$  NMR of BODI-Au-12 (DMSO, 470 MHz, 300K)

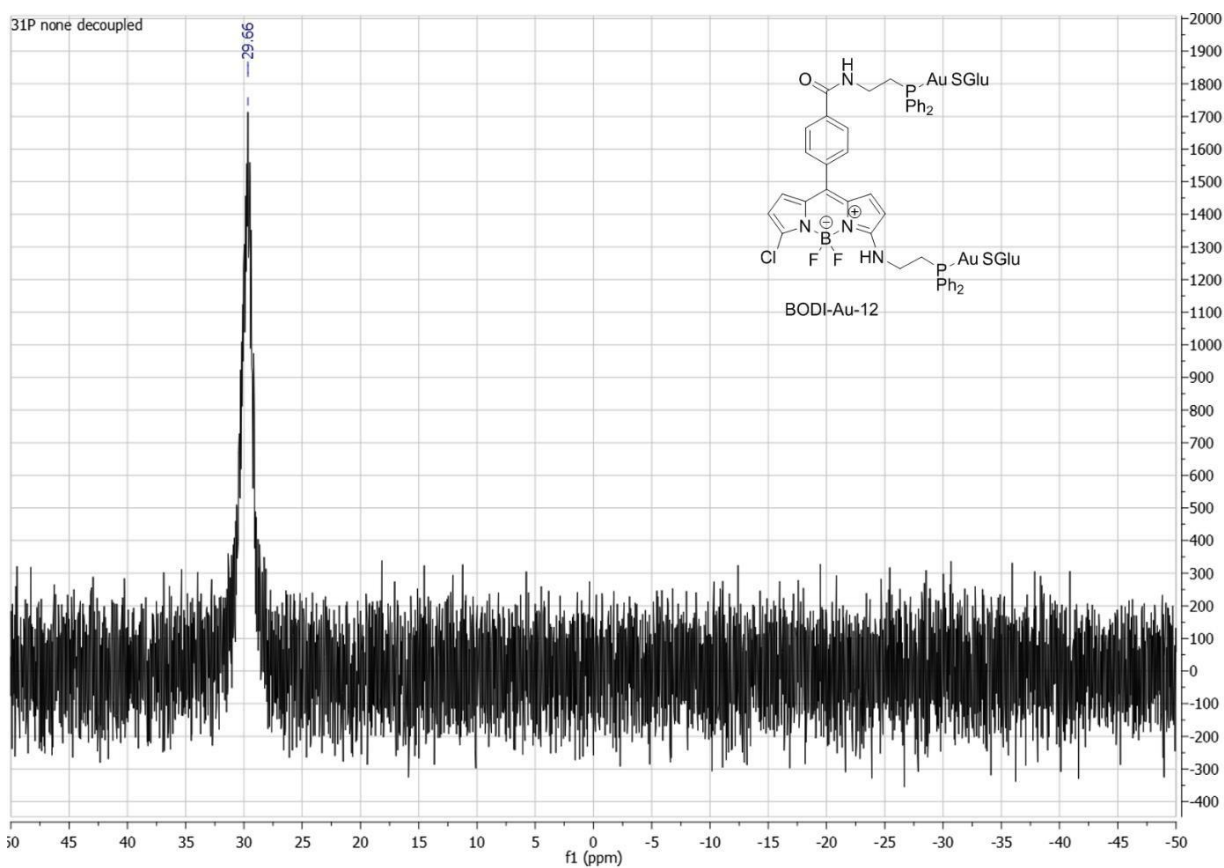

Figure S 70:  $^{31}\text{P}$  NMR of BODI-Au-12 (DMSO, 202 MHz, 300K)

## BODI-Au-13

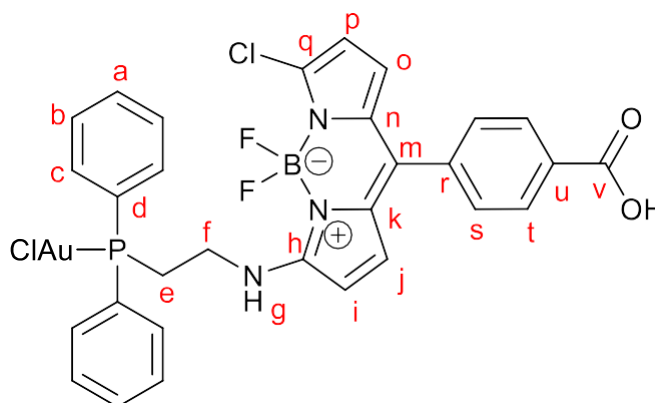

2-(Diphenylphosphino) ethylamine-aurichloride (145mg, 0.315mmol, 1.2eq), BODIPY **3** (100mg, 0.26mmol, 1eq) and  $K_2CO_3$  (181mg, 1.96mmol, 5eq) were placed in a 20 mL round bottom flask and put under argon. 15 mL dry THF were added and the reaction refluxed overnight. The solvents were evaporated and the crude product was purified by column chromatography using  $CH_2Cl_2/MeOH$  (100:0 to 80:20) as eluent. After evaporation of solvents under reduced pressure the product was dissolved in a minimal amount of  $CH_2Cl_2$  and precipitated by addition of pentane to obtain 202.2mg (208  $\mu$ mol; yield = 80%) of **BODI-Au-13** as a red-orange solid.

$^1H$  NMR (500 MHz, DMSO- $D_6$ )  $\delta$  (ppm) = 3.21 – 3.13 (m, 2H,  $H_e$ ), 3.78 – 3.65 (m, 2H,  $H_f$ ), 6.21 (d,  $J$  = 3.8 Hz, 1H,  $H_i$ ), 6.25 (d,  $J$  = 3.8 Hz, 1H,  $H_j$ ), 6.61 (d,  $J$  = 5.1 Hz, 1H,  $H_p$ ), 7.01 (d,  $J$  = 5.2 Hz, 1H,  $H_o$ ), 7.63 – 7.53 (m, 8H,  $H_{a,b}$ ,  $H_s$ ), 7.81 (ddd,  $J$  = 13.2, 7.8, 1.5 Hz, 4H,  $H_c$ ), 8.06 (d,  $J$  = 8.3 Hz, 2H,  $H_t$ ), 8.67 (s, 1H,  $H_g$ ).

$^{13}C$  NMR (126 MHz, DMSO- $D_6$ )  $\delta$  (ppm) = 27.4 (d,  $J$  = 35.6 Hz,  $C_f$ ), 41.3 (d,  $J$  = 11.0 Hz,  $C_e$ ), 111.9 (s,  $C_p$ ), 114.9 (s,  $C_i$ ), 117.3 (s,  $C_o$ ), 126.1 (s,  $C_n$ ,  $C_k$ ), 127.1 (s,  $C_m$ ), 128.9 (d,  $J$  = 60.7 Hz,  $C_d$ ), 129.3 (s,  $C_j$ ), 129.4 (d,  $J$  = 11.5 Hz,  $C_a$ ), 130.4 (s,  $C_s$ ), 130.7 (s,  $C_u$ ), 131.3 (s,  $C_r$ ), 132.1 (d,  $J$  = 2.3 Hz,  $C_b$ ), 133.2 (d,  $J$  = 13.5 Hz,  $C_c$ ), 133.8 (s,  $C_q$ ), 135.8 (s,  $C_t$ ), 137.6 (s,  $C_h$ ), 161.7 (s,  $C_v$ ).

$^{11}B$  NMR (160 MHz, DMSO- $D_6$ )  $\delta$  (ppm) = 0.64 (t,  $J$  = 32.4 Hz).

$^{19}F$  NMR (470 MHz, DMSO- $D_6$ )  $\delta$  (ppm) = -144.38 (dd,  $J_{F-F}$  = 64.5,  $J_{F-B}$  = 31.3 Hz).

$^{31}P$  NMR (202 MHz, DMSO- $D_6$ )  $\delta$  (ppm) = 24.33.

HR-MS (ESI):  $m/z$  = calculated for  $C_{30}H_{24}Au_1B_1Cl_2F_2N_3O_2P_1Na_1$   $[M+Na]^+$  828.06020; found 828.06136.



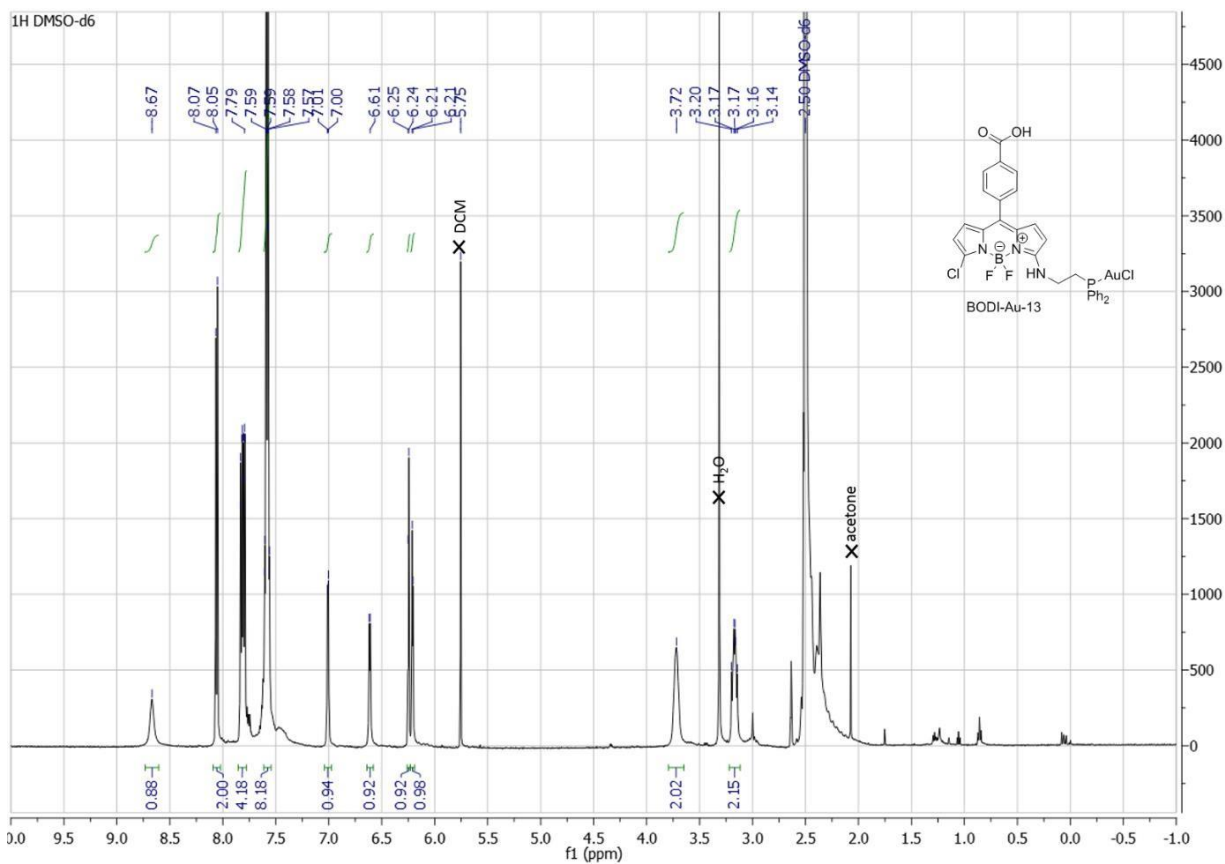

Figure S 71:  $^1\text{H}$  NMR of BODI-Au-13 (DMSO, 500 MHz, 300K)

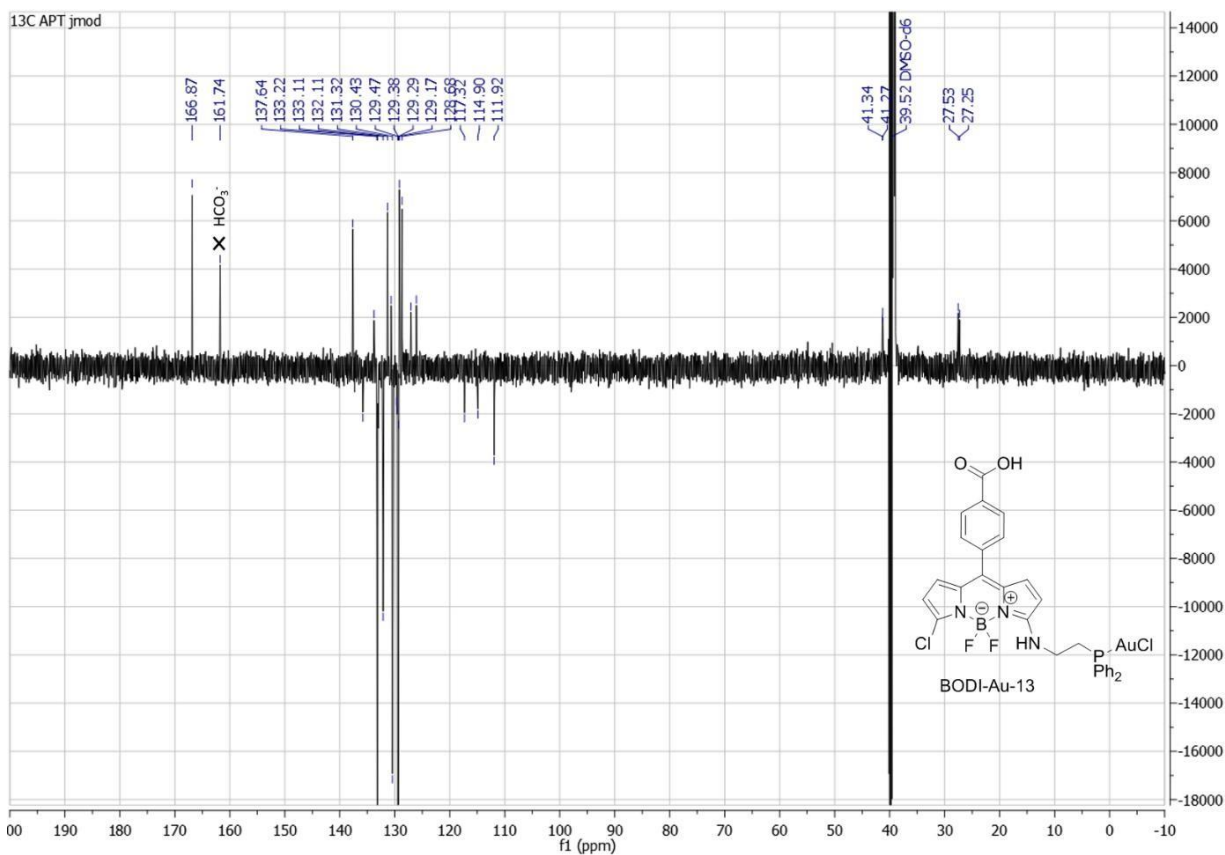

Figure S 72:  $^{13}\text{C}$  NMR (APT jmod) of BODI-Au-13 (DMSO, 126 MHz, 300K)

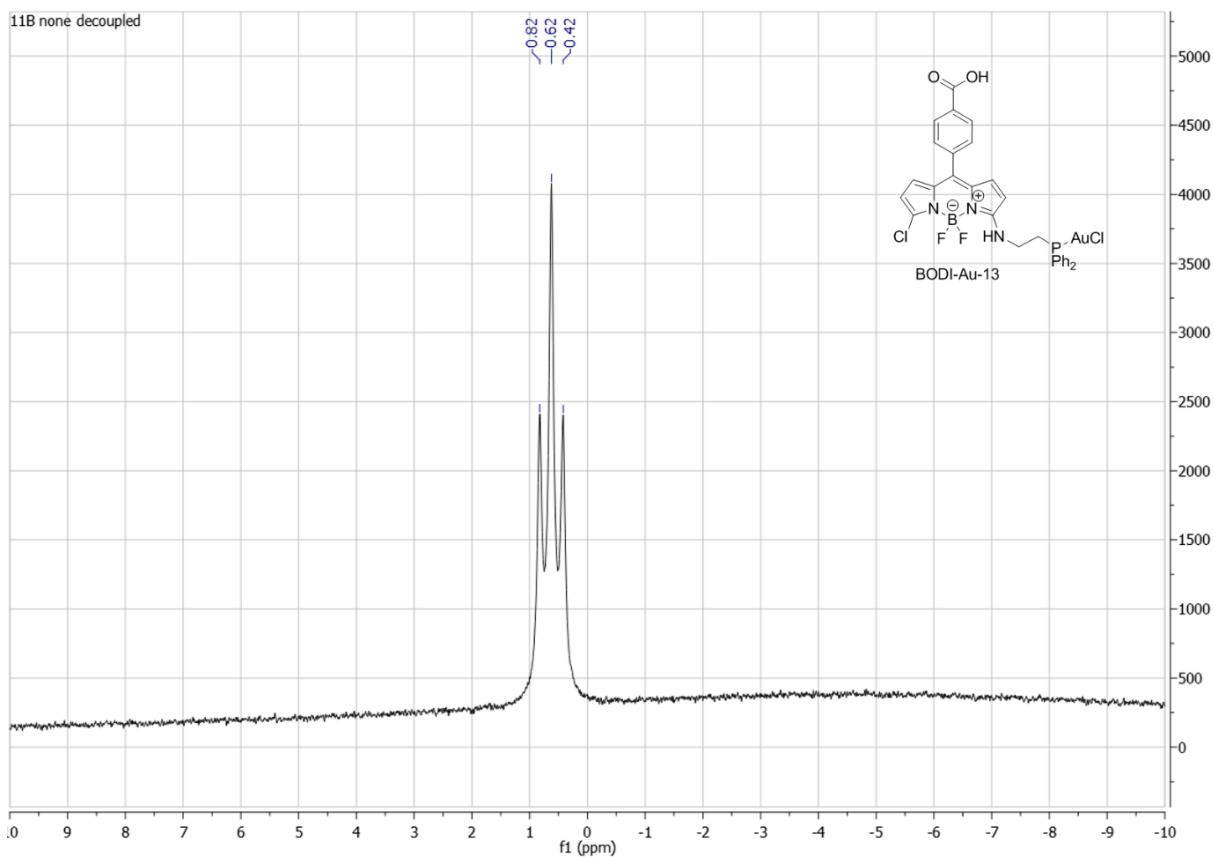

Figure S 73:  $^{11}\text{B}$  NMR of BODI-Au-13 (DMSO, 160 MHz, 300K)

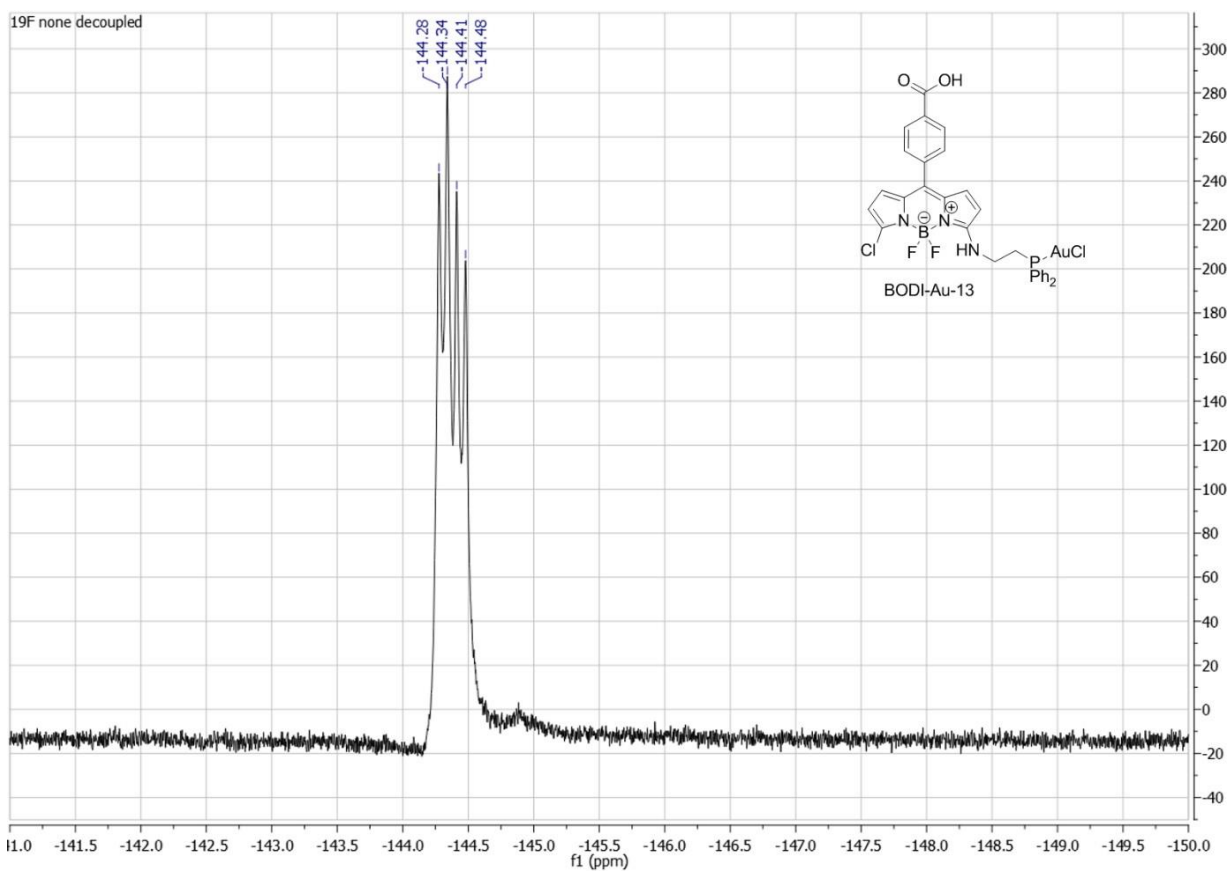

Figure S 74:  $^{19}\text{F}$  NMR of BODI-Au-13 (DMSO, 470 MHz, 300K)

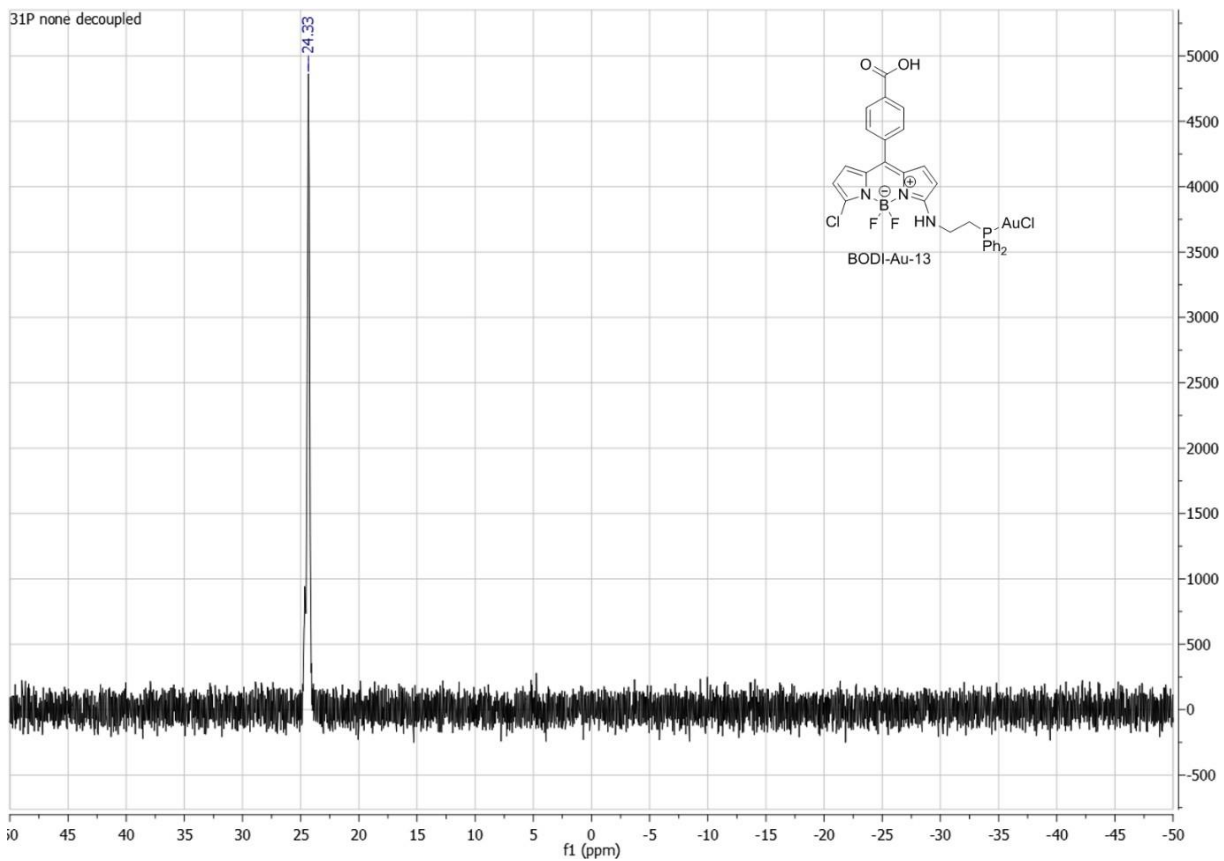

Figure S 75:  $^{31}\text{P}$  NMR of **BODI-Au-13** (DMSO, 202 MHz, 300K)

## BODI-Au-14

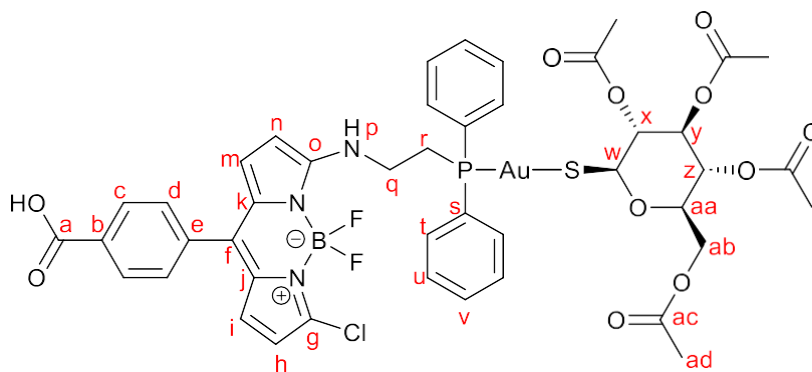

18 mg (49.6  $\mu\text{mol}$ )  $\beta$ -thioglucose-tetraacetate (1 eq) was dissolved in acetone (1 mL). 49.6  $\mu\text{l}$  1M NaOH (1 eq) was added and the resulting solution stirred for 15 min. 40mg (49.6  $\mu\text{mol}$ ) **BODI-Au-13** was placed in a separate roundbottom flask and dissolved in acetone (5 mL). The thioglucose solution was added at once and the reaction stirred for 30 min at room temperature. The solvents were evaporated,  $\text{CH}_2\text{Cl}_2$  (10 mL) was added, and the supernatant separated and evaporated. The resulting crude product was dissolved in a minimal amount of  $\text{CH}_2\text{Cl}_2$  and precipitated with pentane to obtain the pure target compound as a flaky orange powder 51mg (45.14  $\mu\text{mol}$ , 91%).

$^1\text{H}$  NMR (500 MHz,  $\text{CDCl}_3$ )  $\delta$  (ppm) = 1.94 (s, 3H,  $\text{H}_{\text{ad}}$ ), 1.96 (s, 3H,  $\text{H}_{\text{ad}}$ ), 2.02 (s, 3H,  $\text{H}_{\text{ad}}$ ), 2.11 (s, 3H,  $\text{H}_{\text{ad}}$ ), 2.91 (tdd,  $J = 10.2, 6.6, 3.3$  Hz, 2H,  $\text{H}_r$ ), 3.77 (ddd,  $J = 9.4, 4.9, 2.4$  Hz, 1H,  $\text{H}_{\text{ab}}$ ), 3.83 (dt,  $J = 16.1, 7.7$  Hz, 2H,  $\text{H}_q$ ), 4.13 (dd,  $J = 12.2, 2.2$  Hz, 1H,  $\text{H}_{\text{ab}'}$ ), 4.24 (dd,  $J = 12.2, 5.0$  Hz, 1H,  $\text{H}_z$ ), 5.17 – 5.05 (m, 3H,  $\text{H}_x, \text{H}_y, \text{H}_{\text{aa}}$ ), 5.22 (d,  $J = 8.7$  Hz, 1H,  $\text{H}_w$ ), 6.19 (d,  $J = 3.8$  Hz, 1H,  $\text{H}_n$ ), 6.26 (d,  $J = 4.9$  Hz, 1H,  $\text{H}_m$ ), 6.31 (d,  $J = 3.7$  Hz, 1H,  $\text{H}_h$ ), 6.83 (d,  $J = 4.8$  Hz, 1H,  $\text{H}_i$ ), 6.90 (s, 1H,  $\text{H}_p$ ), 7.62 – 7.37 (m, 8H,  $\text{H}_{u,v}, \text{H}_d$ ), 7.84 – 7.67 (m, 4H,  $\text{H}_t$ ), 8.18 (d,  $J = 8.0$  Hz, 2H,  $\text{H}_c$ ).

$^{13}\text{C}$  NMR (126 MHz,  $\text{CDCl}_3$ )  $\delta$  (ppm) = 20.8 (s,  $\text{C}_{\text{ad}}$ ), 20.8 (s,  $\text{C}_{\text{ad}}$ ), 20.9 (s,  $\text{C}_{\text{ad}}$ ), 21.3 (s,  $\text{C}_{\text{ad}}$ ), 29.9 (d,  $J = 31.7$  Hz,  $\text{C}_q$ ), 41.3 (d,  $J = 12.3$  Hz,  $\text{C}_r$ ), 63.0 (s,  $\text{C}_{\text{ab}}$ ), 69.1 (s,  $\text{C}_z$ ), 74.3 (s,  $\text{C}_y$ ), 76.0 (s,  $\text{C}_x$ ), 78.3 (s,  $\text{C}_{\text{aa}}$ ), 83.6 (s,  $\text{C}_w$ ), 111.4 (s,  $\text{C}_h$ ), 113.3 (s,  $\text{C}_n$ ), 120.7 (s,  $\text{C}_i$ ), 129.0 (dd,  $J = 55.4, 8.0$  Hz,  $\text{C}_s$ ), 129.8 (dd,  $J = 11.4, 6.5$  Hz,  $\text{C}_v$ ), 130.2 (s,  $\text{C}_m$ ), 130.3 (s,  $\text{C}_k, \text{C}_j$ ), 130.6 (s,  $\text{C}_d$ ), 130.9 (s,  $\text{C}_f$ ), 131.5 (s,  $\text{C}_e$ ), 132.4 (dd,  $J = 8.3, 2.2$  Hz,  $\text{C}_u$ ), 133.4 (t,  $J = 13.9$  Hz,  $\text{C}_t$ ), 135.8 (s,  $\text{C}_c$ ), 139.2 (s,  $\text{C}_g, \text{C}_o$ ), 161.6 (s,  $\text{C}_a$ ), 169.9 (s,  $\text{C}_{\text{ac}}$ ), 170.5 (s,  $\text{C}_{\text{ac}}$ ), 170.6 (s,  $\text{C}_{\text{ac}}$ ), 171.0 (s,  $\text{C}_{\text{ac}}$ ).

$^{11}\text{B}$  NMR (160 MHz,  $\text{CDCl}_3$ )  $\delta$  (ppm) = 0.83 (t,  $J = 32.7$  Hz).

$^{19}\text{F}$  NMR (470 MHz,  $\text{CDCl}_3$ )  $\delta$  (ppm) = -147.78 (s, br).

$^{31}\text{P}$  NMR (202 MHz,  $\text{CDCl}_3$ )  $\delta$  (ppm) = 29.39. (s, br).

HR-MS (ESI):  $m/z$  = calculated for  $\text{C}_{44}\text{H}_{43}\text{Au}_1\text{B}_1\text{Cl}_1\text{F}_2\text{N}_3\text{O}_{11}\text{P}_1\text{S}_1\text{Na}_1$   $[\text{M}+\text{Na}]^+$  1156.16633; found 1156.16962.

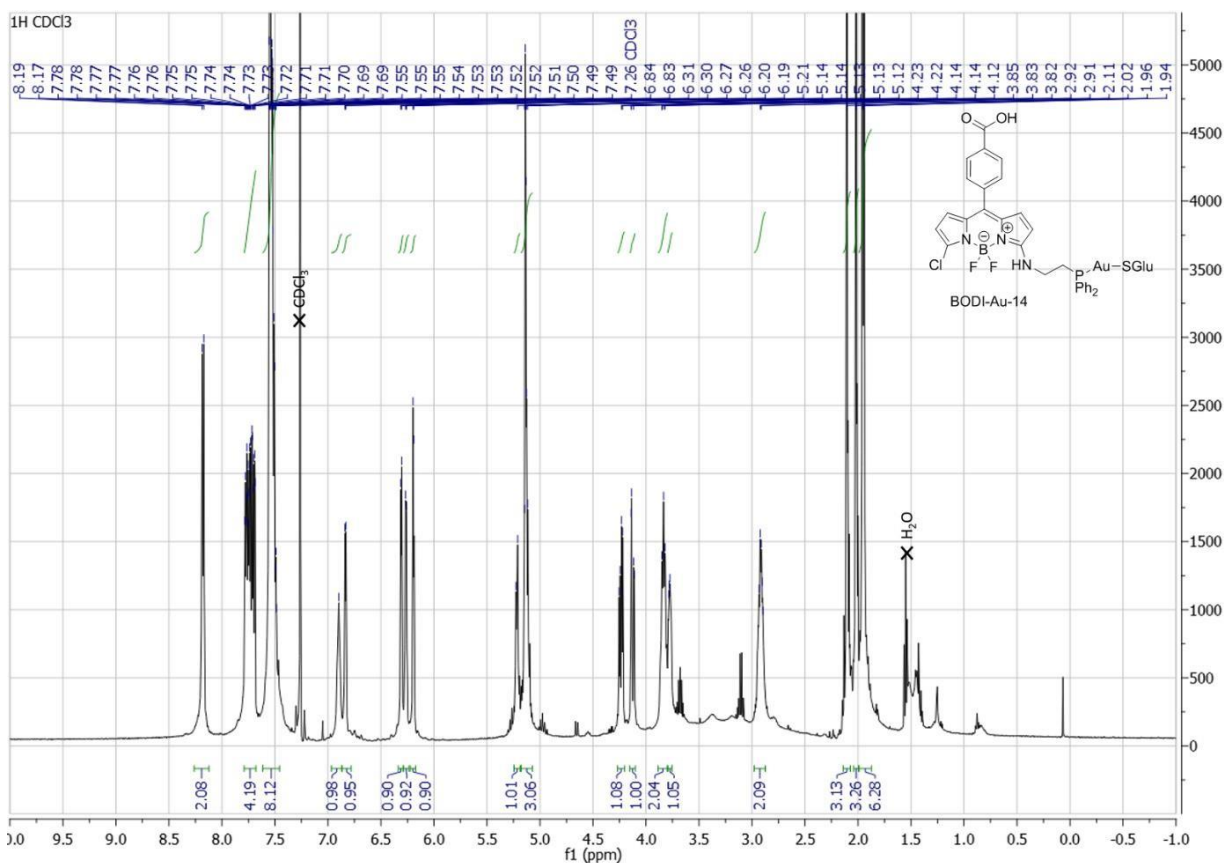

Figure S 76: <sup>1</sup>H NMR of BODI-Au-14 (CDCl<sub>3</sub>, 500 MHz, 300K)

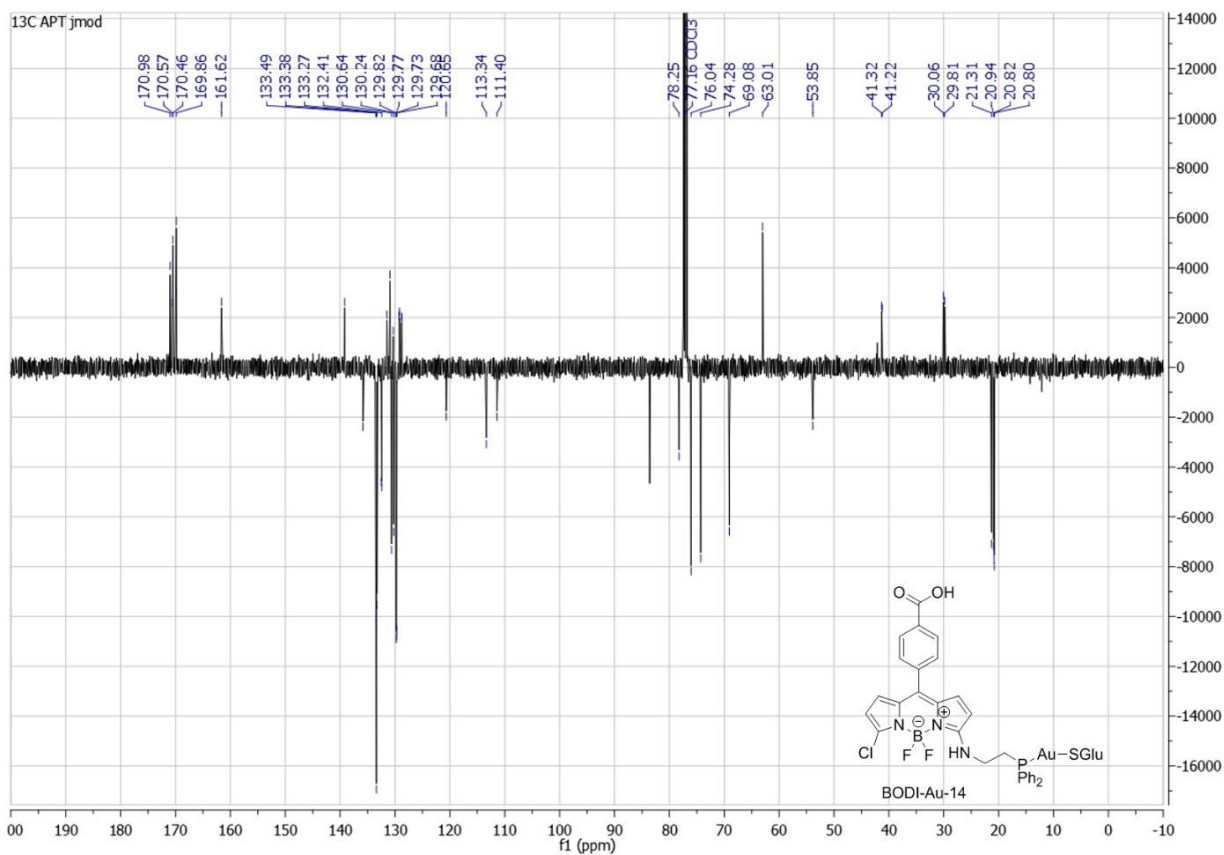

Figure S 77: <sup>13</sup>C NMR (APT jmod) of BODI-Au-14 (CDCl<sub>3</sub>, 126 MHz, 300K)

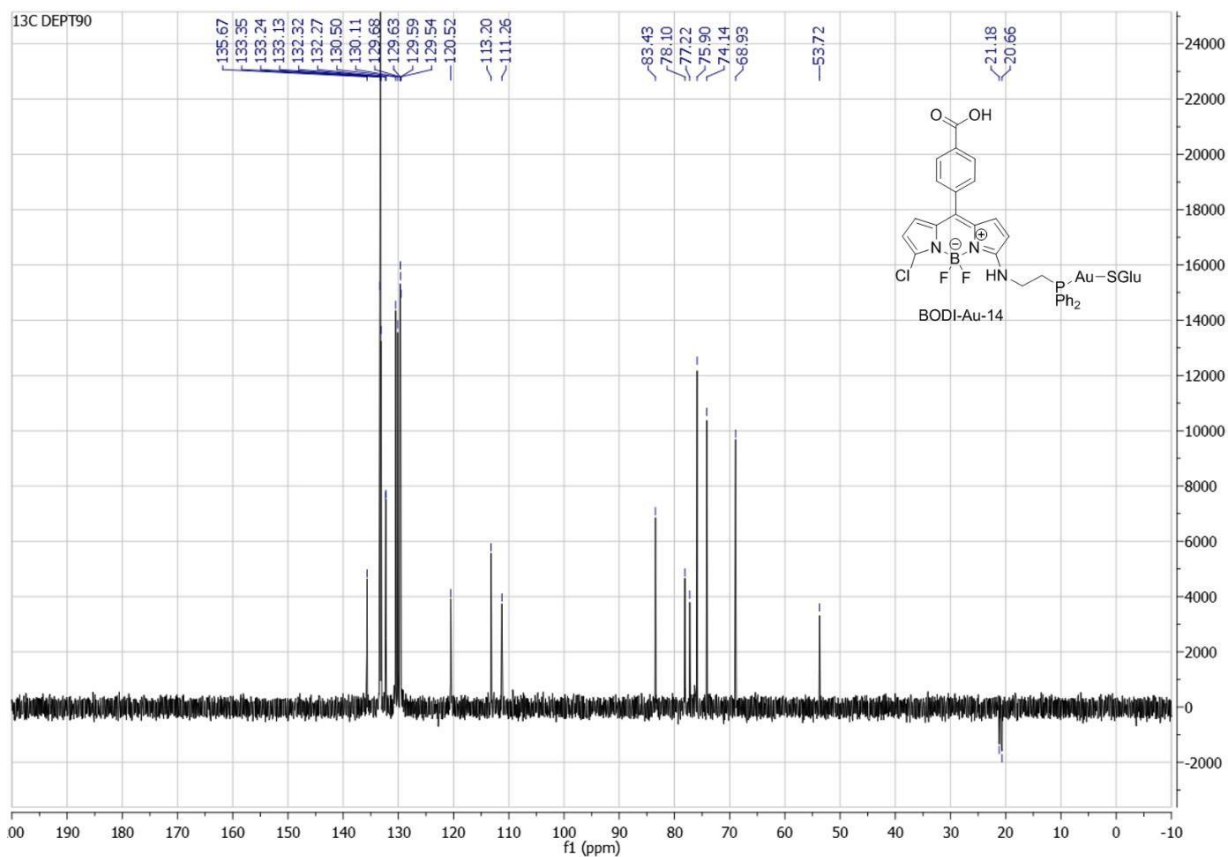

Figure S 78:  $^{13}\text{C}$  NMR (DEPT90) of BODI-Au-14 ( $\text{CDCl}_3$ , 126 MHz, 300K)

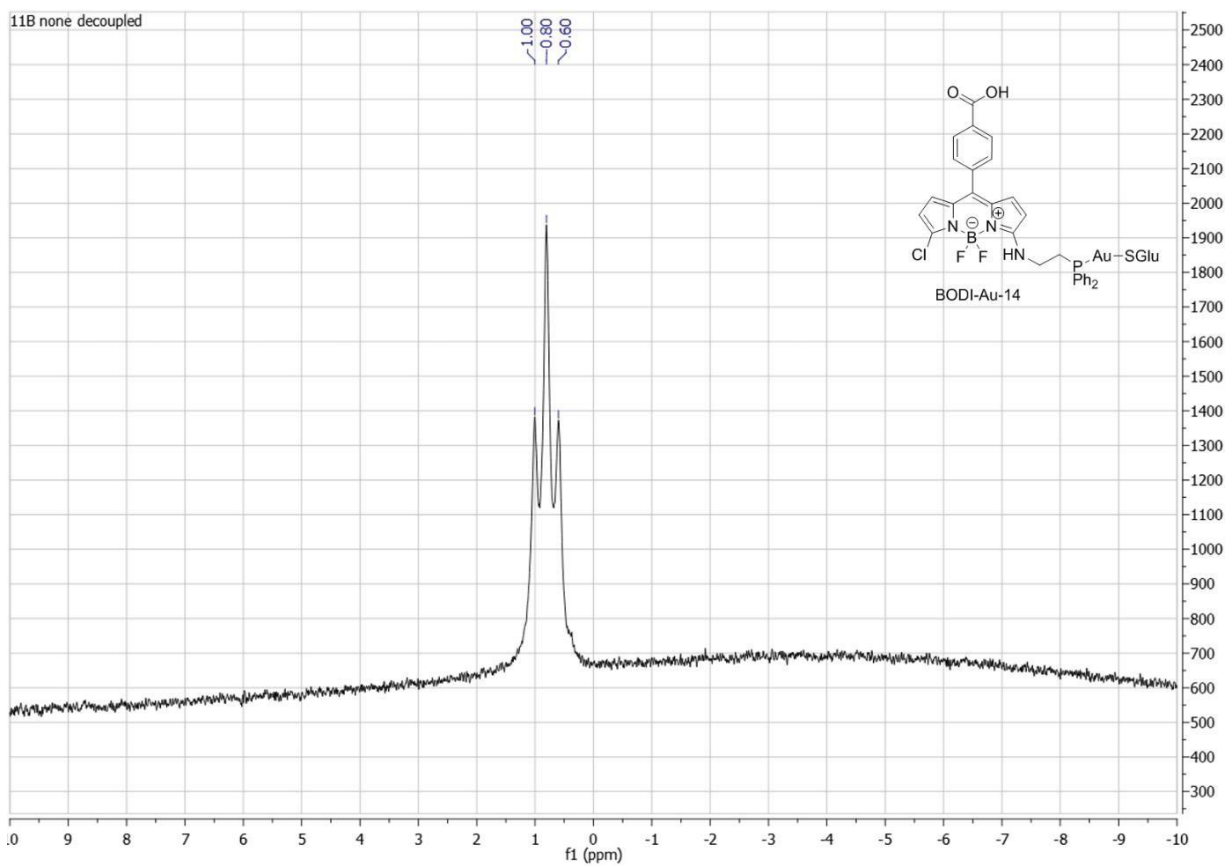

Figure S 79:  $^{11}\text{B}$  NMR of BODI-Au-14 ( $\text{CDCl}_3$ , 160 MHz, 300K)

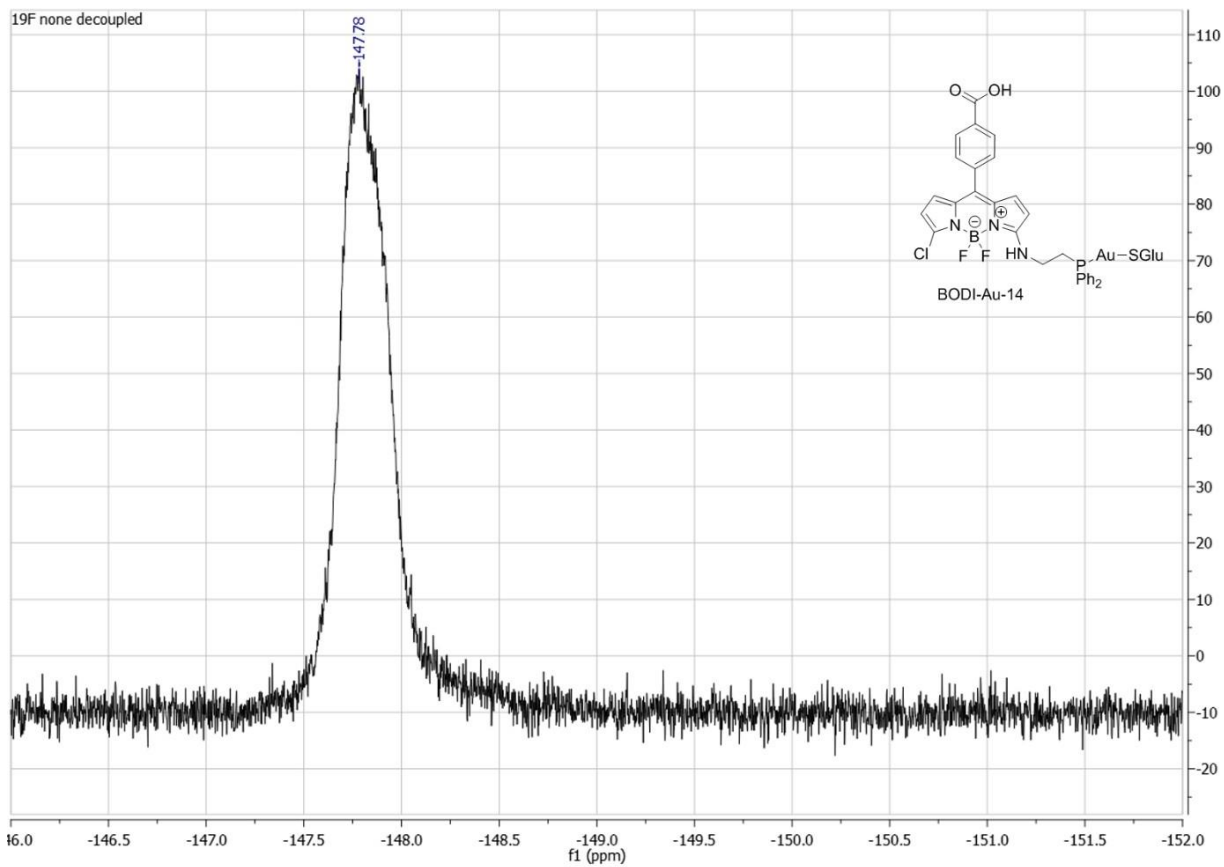

Figure S 80:  $^{19}\text{F}$  NMR of BODI-Au-14 ( $\text{CDCl}_3$ , 470 MHz, 300K)

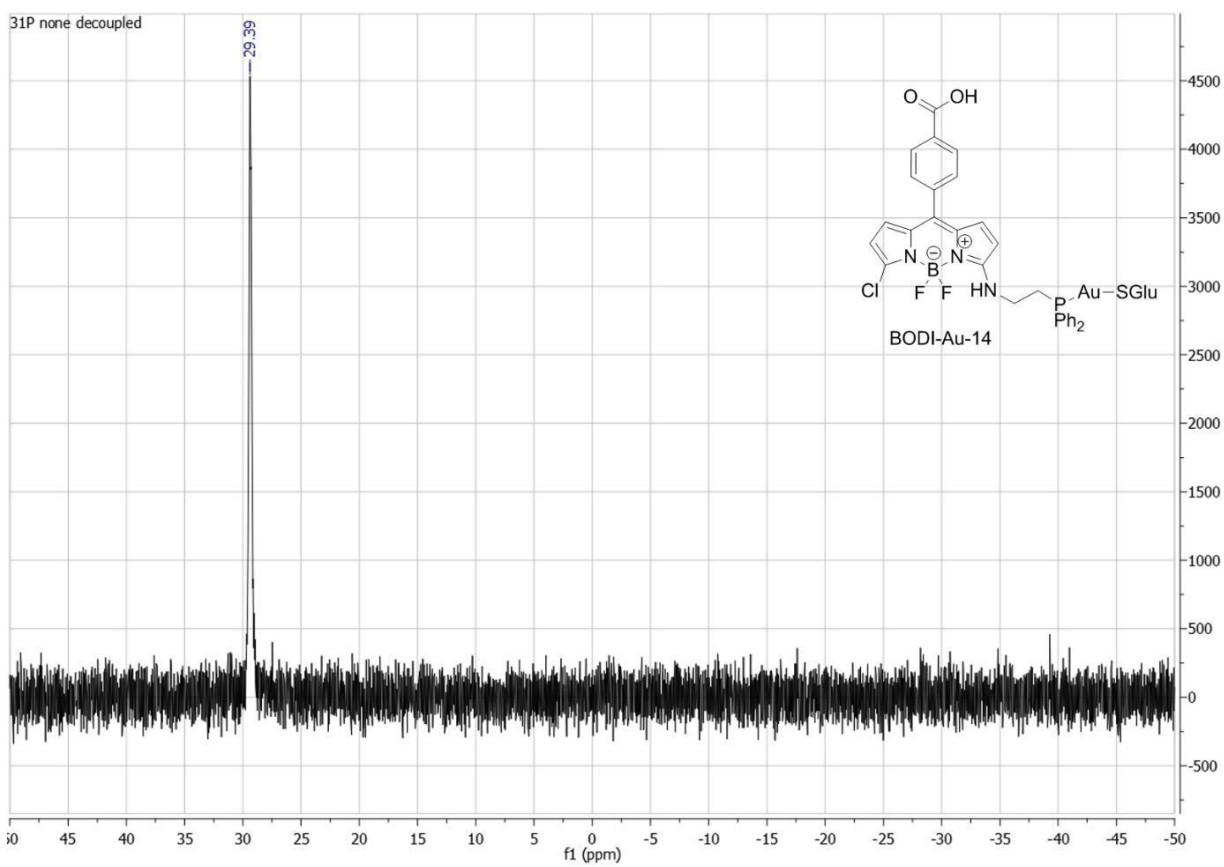

Figure S 81:  $^{31}\text{P}$  NMR of BODI-Au-14 ( $\text{CDCl}_3$ , 202 MHz, 300K)





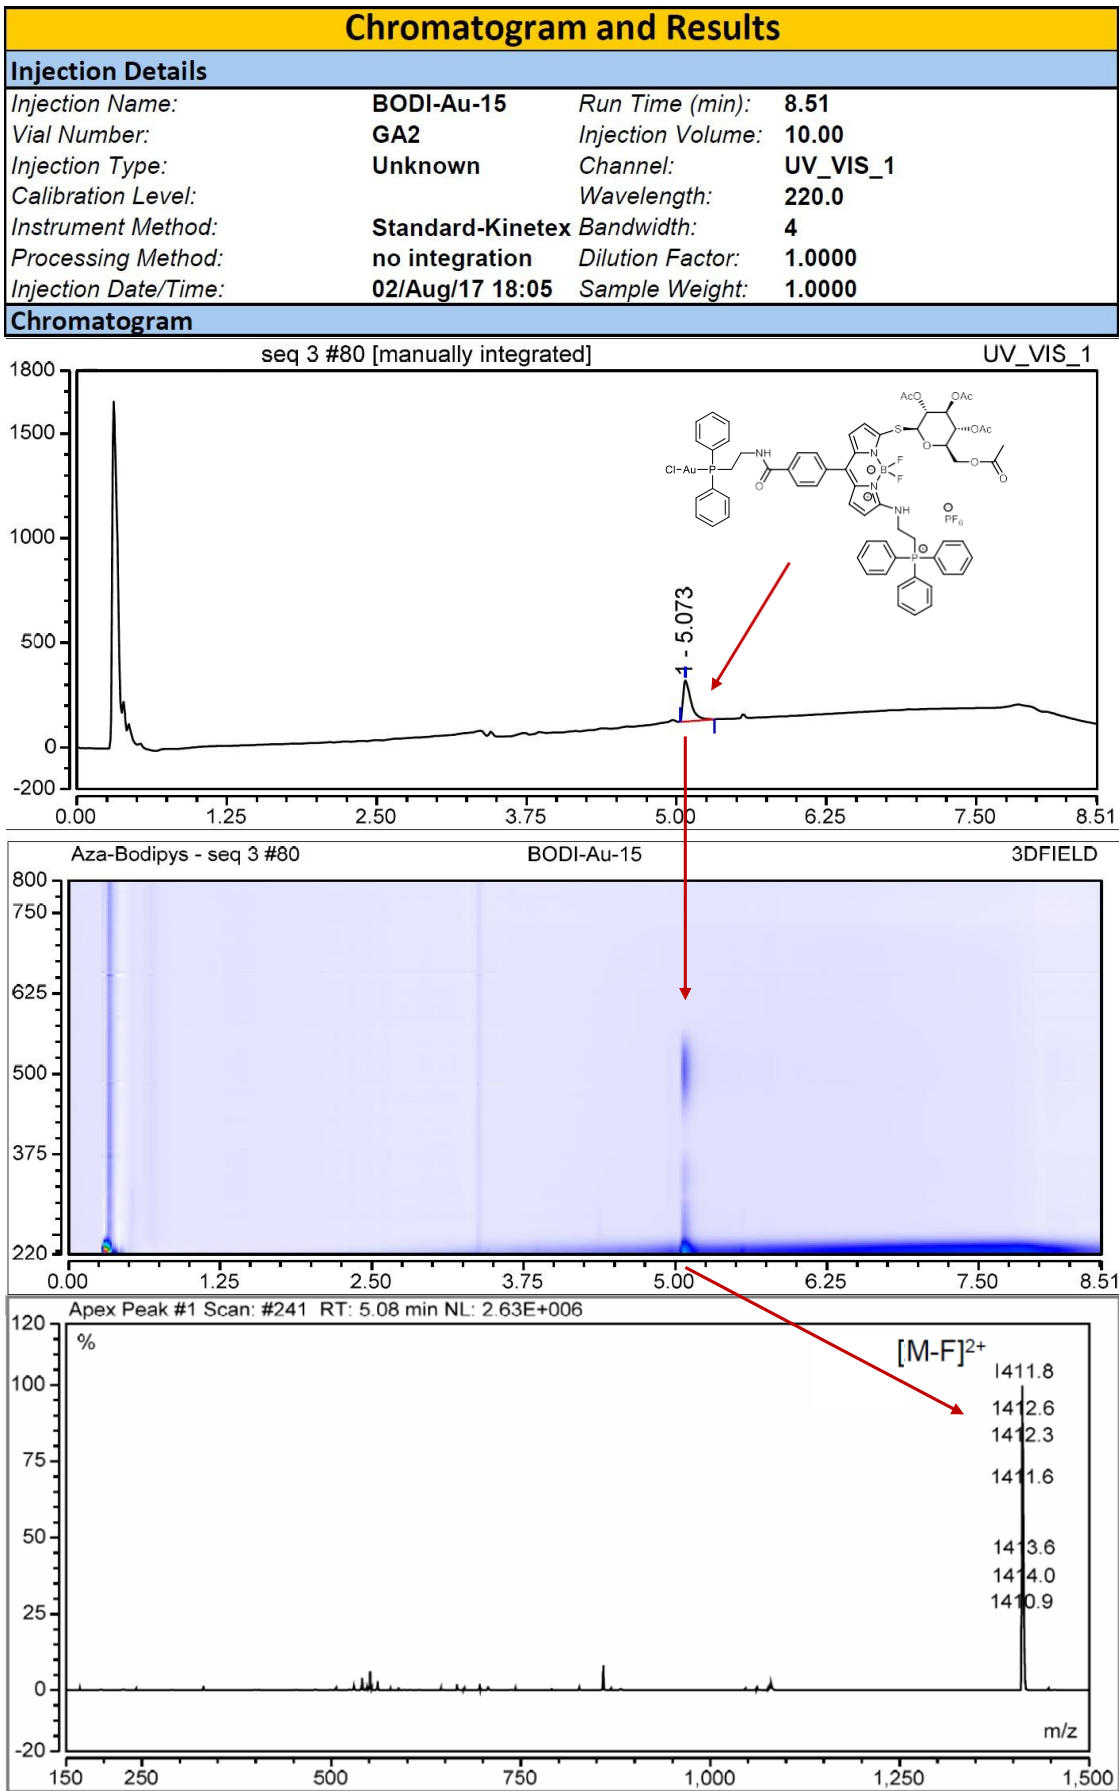

Figure S 82: HPLC chromatogram of BODI-Au-15 (UV-detection at 220 nm + MS analysis)

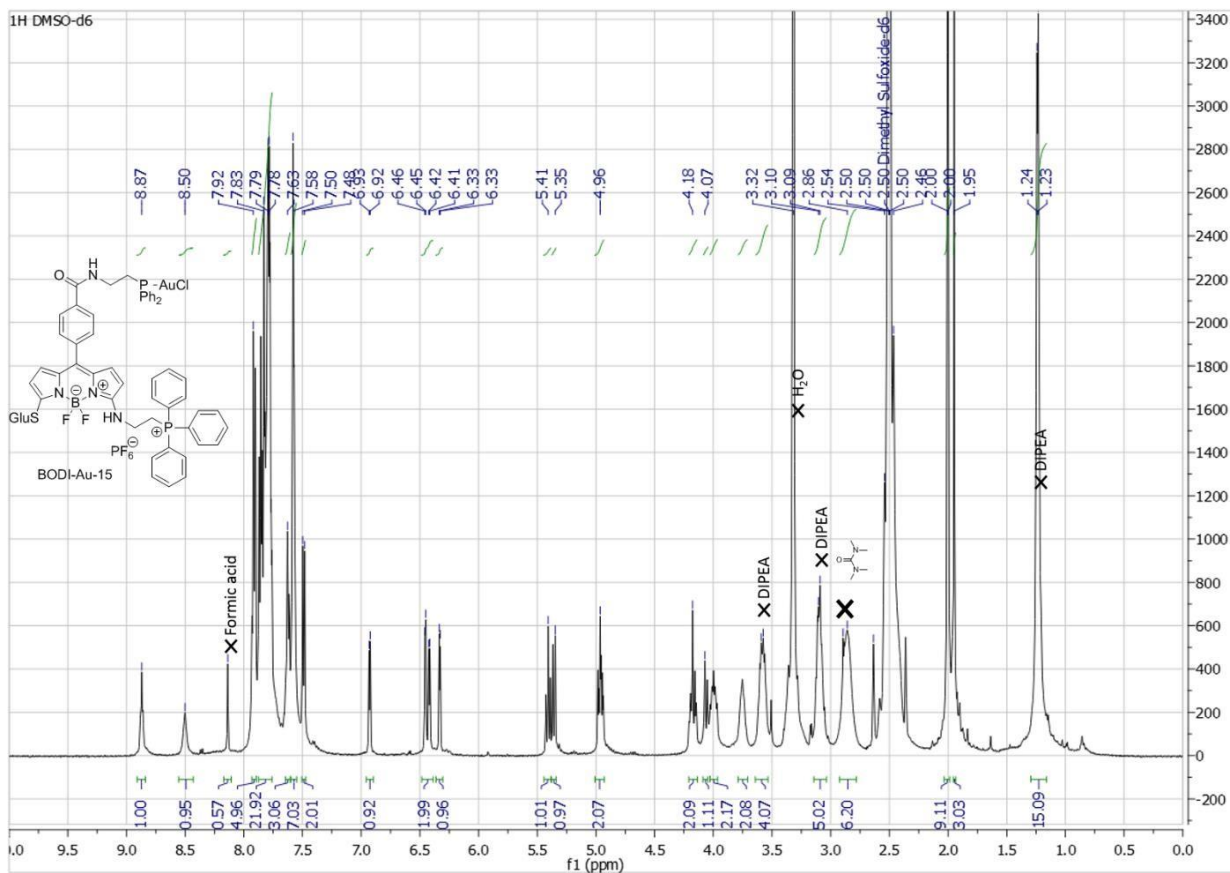

Figure S 83: <sup>1</sup>H NMR of BODI-Au-15 (DMSO, 500 MHz, 300K)

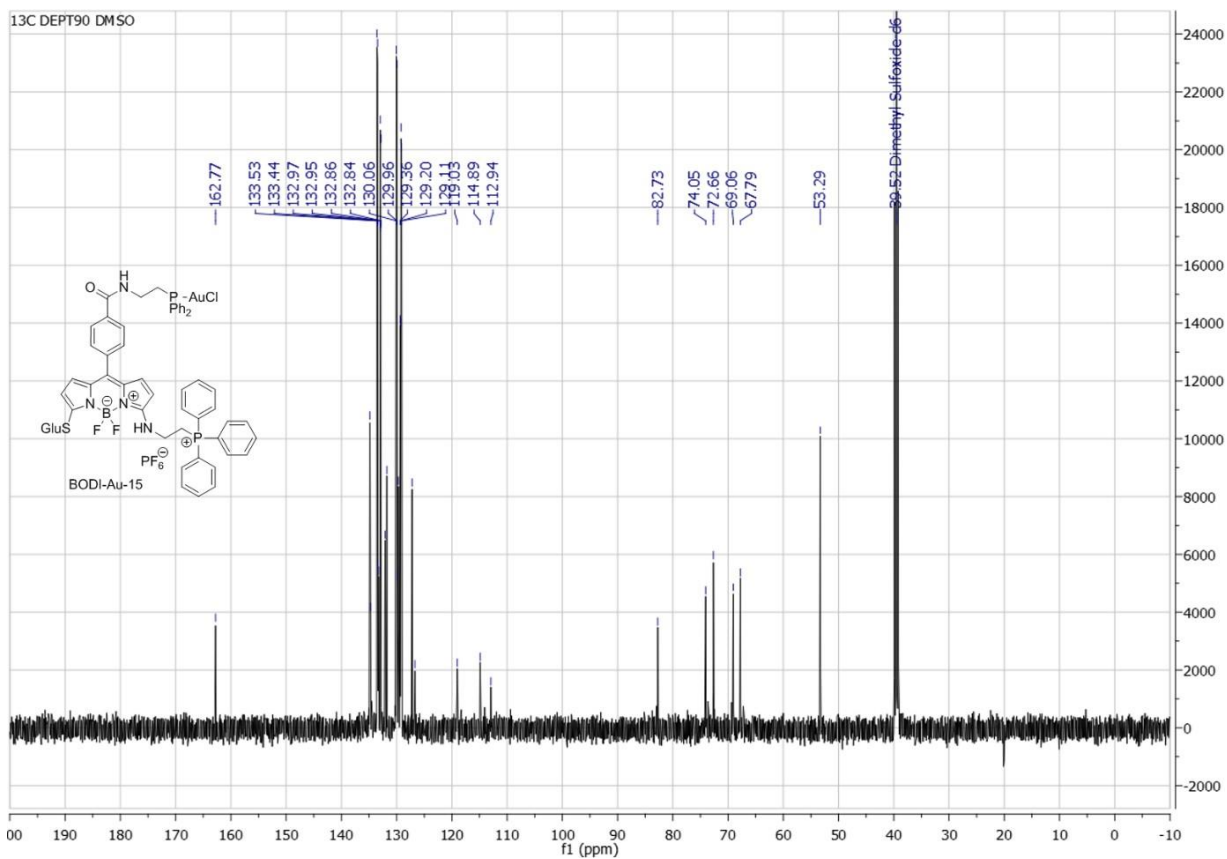

Figure S 84: <sup>13</sup>C NMR (DEPT90) of BODI-Au-15 (DMSO, 126 MHz, 300K)

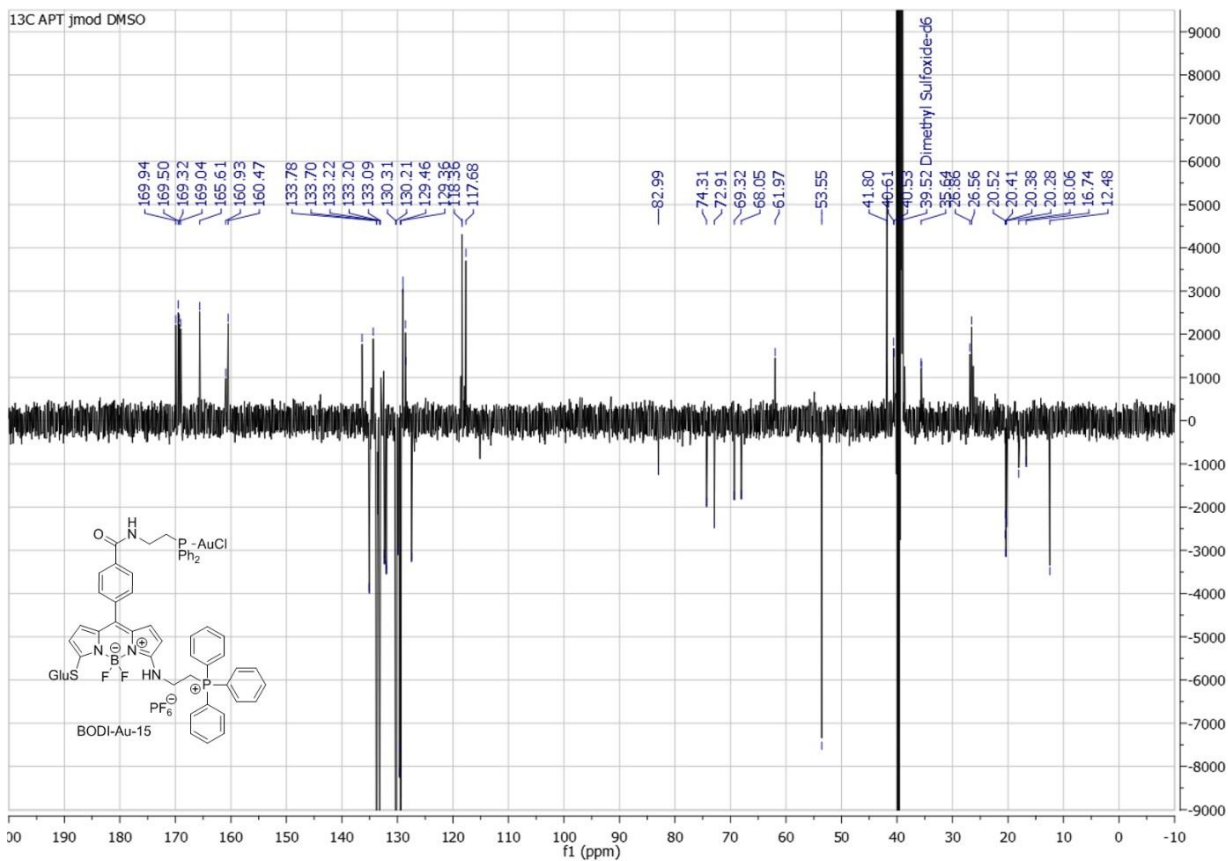

Figure S 85:  $^{13}\text{C}$  NMR (APT jmod) of BODI-Au-15 (DMSO, 126 MHz, 300K)

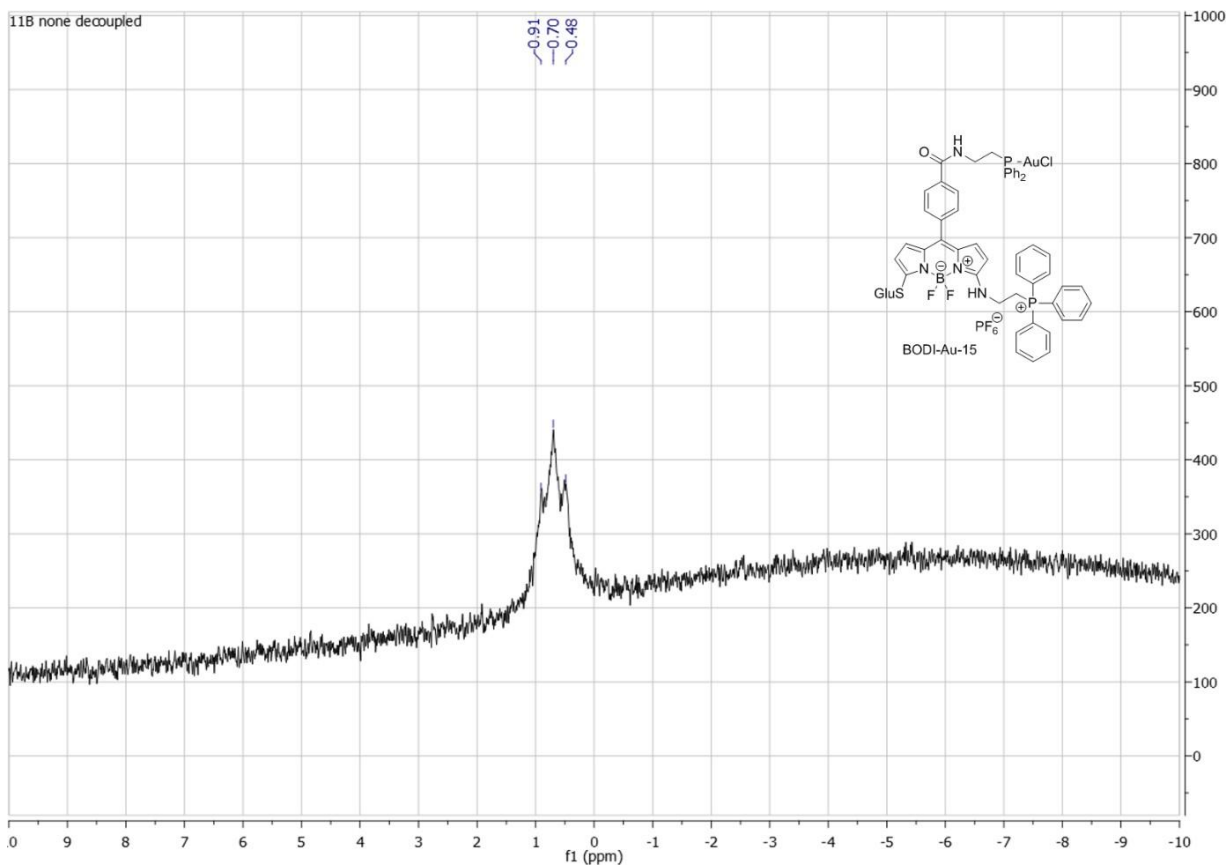

Figure S 86:  $^{11}\text{B}$  NMR of BODI-Au-15 (DMSO, 160 MHz, 300K)

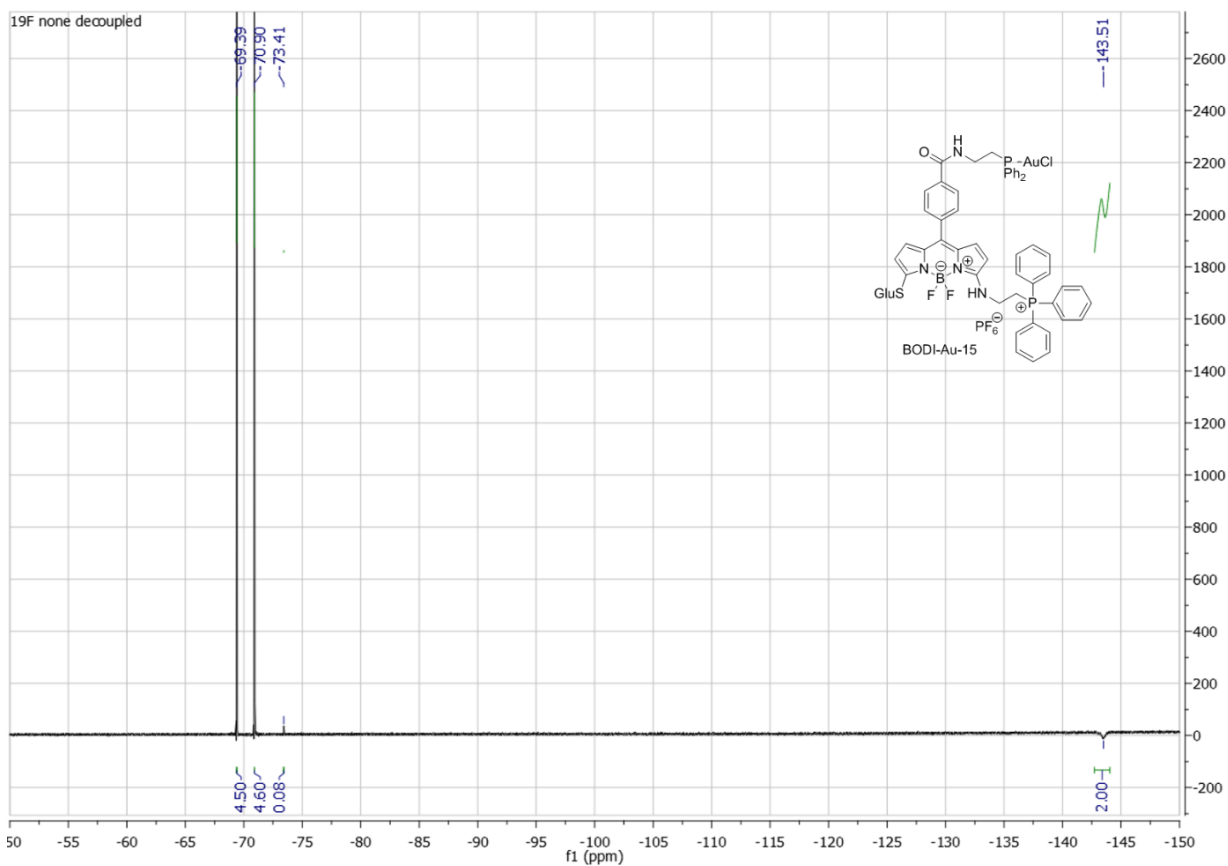

Figure S 87:  $^{19}\text{F}$  NMR of BODI-Au-15 (DMSO, 470 MHz, 300K)

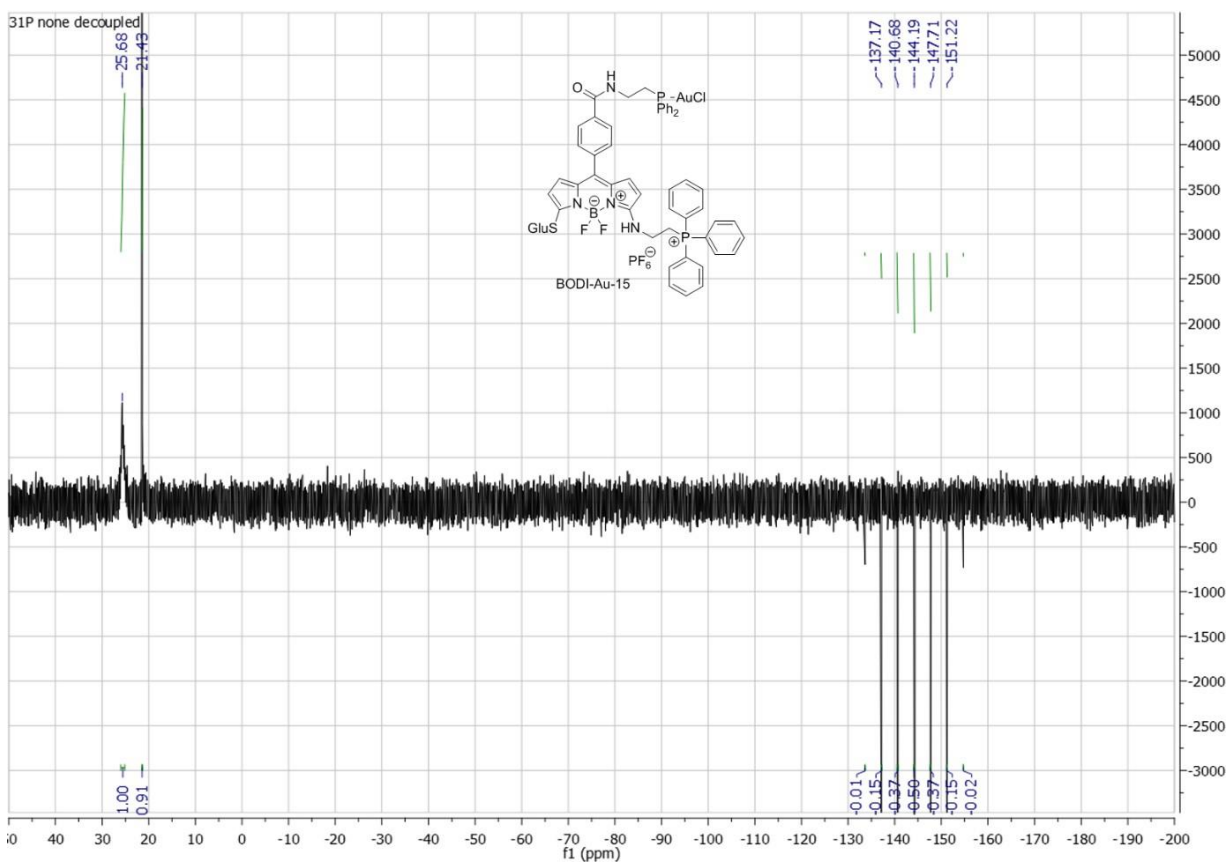

Figure S 88:  $^{31}\text{P}$  NMR of BODI-Au-15 (DMSO, 202 MHz, 300K)

## BODI-Au-16

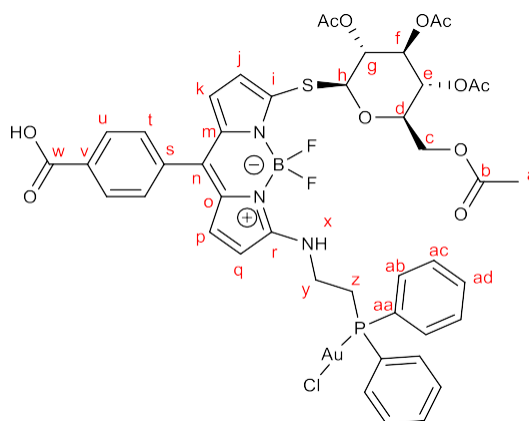

32.2mg (0.045mmol, 1eq) of BODIPY 7 were dissolved in 8 mL dry THF. 25.2mg (0.054mmol, 1.2eq) of 2-(diphenylphosphino)-ethylamine-aurichloride and 31.4mg (0.227mmol, 5eq) of  $K_2CO_3$  were added, and the reaction was refluxed for 60min. The solvent was evaporated, and the crude product was purified by column chromatography on silica gel, using  $CH_2Cl_2/MeOH$  (100:0 to 90:10) as eluent. Product fractions were collected and evaporated to dryness. After dissolution in a minimal amount of  $CH_2Cl_2$  the product is crushed out by addition of pentane (twice) to yield pure **BODI-Au-16** (42mg, 36.9  $\mu$ mol, 82% yield) as a red-pink powder.

$^1H$ NMR (500 MHz, DMSO- $D_6$ )  $\delta$  (ppm)= 1.94, 1.99, 2.00 (3s, 12H,  $H_a$ ), 3.22 – 3.07 (m, 2H,  $H_z$ ), 3.68 (s, 2H,  $H_y$ ), 4.05 (dd,  $J$  = 14.7, 5.2 Hz, 1H,  $H_d$ ), 4.16 (q,  $J$  = 5.3 Hz, 2H,  $H_c$ ), 4.95 (t,  $J$  = 9.7 Hz, 2H,  $H_g$ ,  $H_e$ ), 5.32 (d,  $J$  = 10.1 Hz, 1H,  $H_h$ ), 5.39 (t,  $J$  = 9.4 Hz, 1H,  $H_f$ ), 6.30 (d,  $J$  = 3.8 Hz, 1H,  $H_q$ ), 6.43 (d,  $J$  = 3.8 Hz, 1H,  $H_p$ ), 6.51 (d,  $J$  = 5.1 Hz, 1H,  $H_j$ ), 6.94 (d,  $J$  = 5.1 Hz, 1H,  $H_k$ ), 7.53 (d,  $J$  = 8.1 Hz,  $H_{at}$ ), 7.60 – 7.55 (m, 6H,  $H_{ac}$ ,  $H_{ad}$ ), 7.86 – 7.76 (m, 4H,  $H_{ab}$ ), 8.06 (d,  $J$  = 7.9 Hz, 2H,  $H_u$ ), 8.46 (s, 1H,  $H_x$ ).

$^{13}C$ NMR (126 MHz, DMSO- $D_6$ )  $\delta$  (ppm)= 20.3 (s,  $C_a$ ), 20.4 (s,  $C_a$ ), 20.4 (s,  $C_a$ ), 20.5 (s,  $C_a$ ), 27.5 (d,  $J$  = 35.5 Hz,  $C_y$ ), 41.2 (d,  $J$  = 10.5 Hz,  $C_z$ ), 61.9 (s,  $C_c$ ), 68.1 (s,  $C_e$ ), 69.3 (s,  $C_f$ ), 73.0 (s,  $C_g$ ), 74.3 (s,  $C_d$ ), 83.3 (s,  $C_h$ ), 113.3 (s,  $C_q$ ), 115.0 (s,  $C_j$ ), 118.6 (s,  $C_p$ ), 127.5 (s,  $C_r$ ), 128.7 (ps-d,  $J$  = 3.5 Hz,  $C_{aa}$ ,  $C_o$ ,  $C_m$ ), 129.2 (ps-d,  $J$  = 3.5 Hz,  $C_n$ ,  $C_v$ ), 129.3 (s,  $C_k$ ), 129.4 (d,  $J$  = 11.7 Hz,  $C_{ad}$ ), 130.1 (s,  $C_t$ ), 132.1 (d,  $J$  = 1.8 Hz,  $C_{ac}$ ), 132.5 (s,  $C_r$ ,  $C_n$ ), 133.2 (d,  $J$  = 12.6 Hz,  $C_{ab}$ ), 133.7 (s, br,  $C_i$ ,  $C_s$ ), 135.2 (s,  $C_u$ ), 161.2 (s,  $C_w$ ), 169.1 (s,  $C_b$ ), 169.3 (s,  $C_b$ ), 169.5 (s,  $C_b$ ), 170.0 (s,  $C_b$ ).

$^{11}B$  NMR (160 MHz, DMSO- $D_6$ )  $\delta$  (ppm)= 0.69 (t,  $J$  = 34.0 Hz).

$^{19}F$  NMR (470 MHz, DMSO- $D_6$ )  $\delta$  (ppm)= -142.81 – -143.79 (m).

$^{31}P$  NMR (202 MHz, DMSO- $D_6$ )  $\delta$  (ppm) = 24.40 (s, br).

HR-MS (ESI):  $m/z$  = calculated for  $C_{44}H_{43}Au_1B_1Cl_1F_2N_3O_{11}P_1S_1Na_1$   $[M+Na]^+$  1156.16633; found 1156.17033.

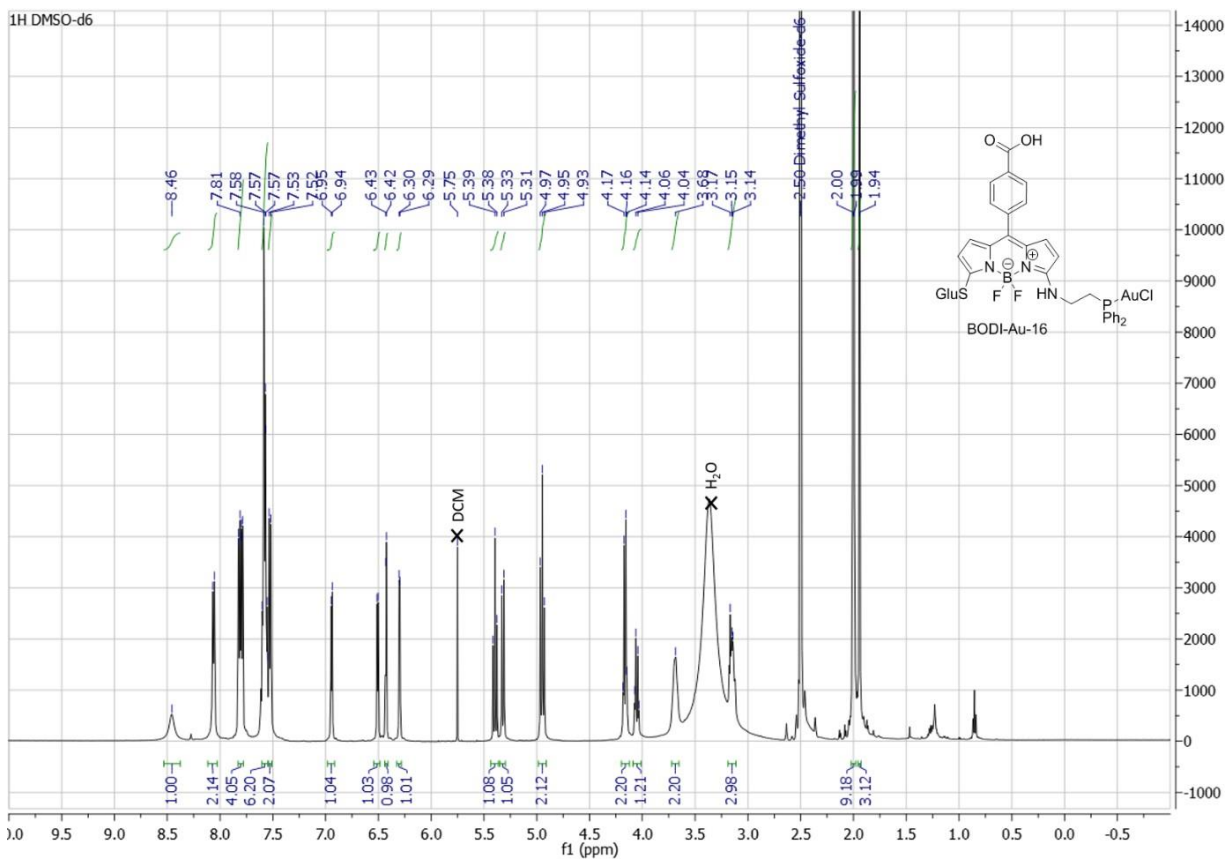

Figure S 89: <sup>1</sup>H NMR of BODI-Au-16 (DMSO, 500 MHz, 300K)

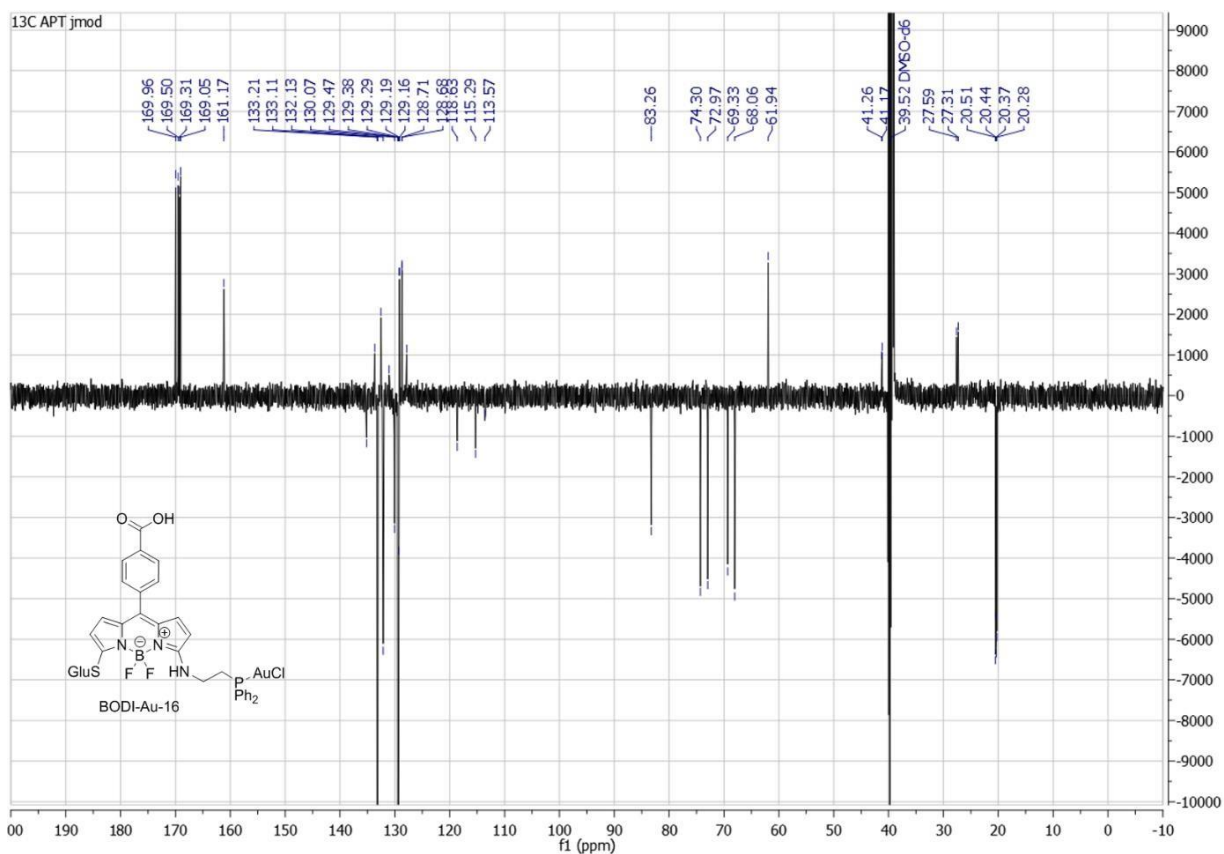

Figure S 90: <sup>13</sup>C NMR (APT jmod) of BODI-Au-16 (DMSO, 126 MHz, 300K)

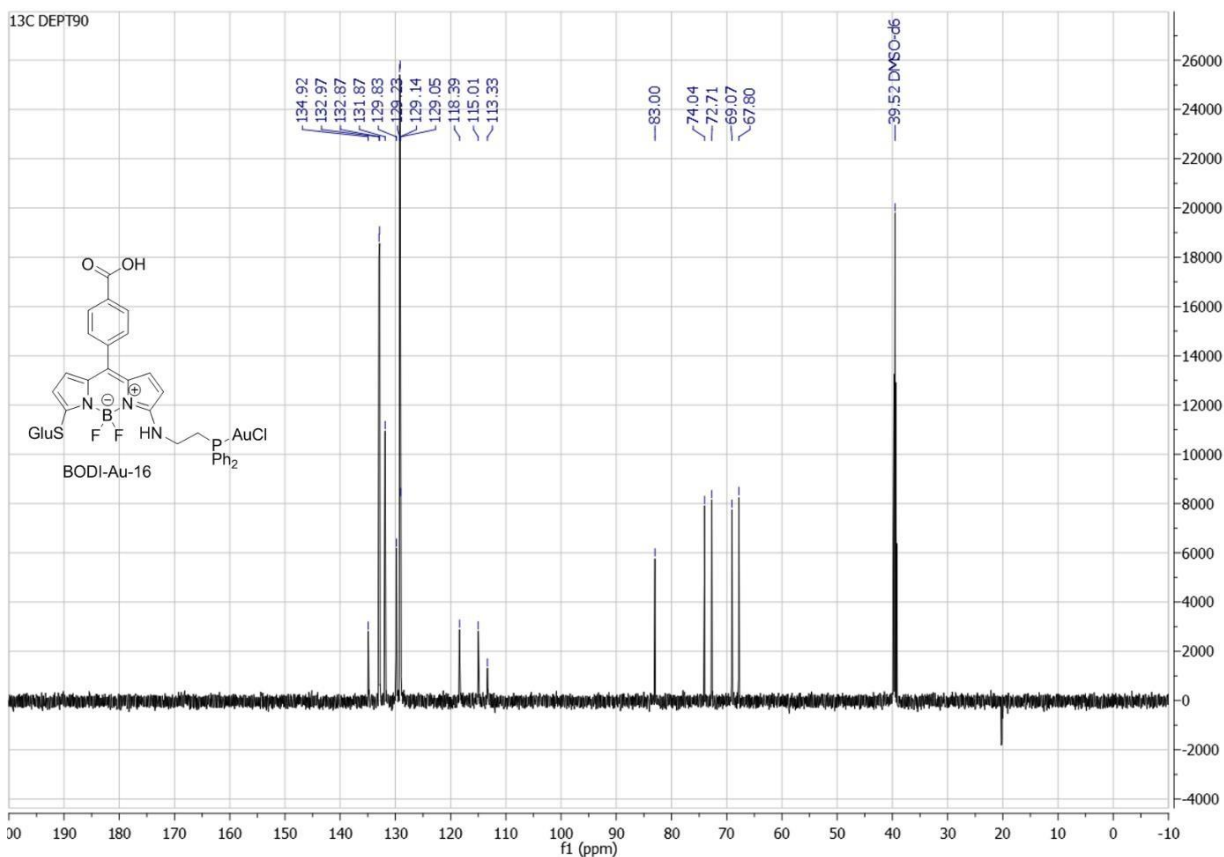

Figure S 91:  $^{13}\text{C}$  NMR (DEPT90) of **BODI-Au-16** (DMSO, 126 MHz, 300K)

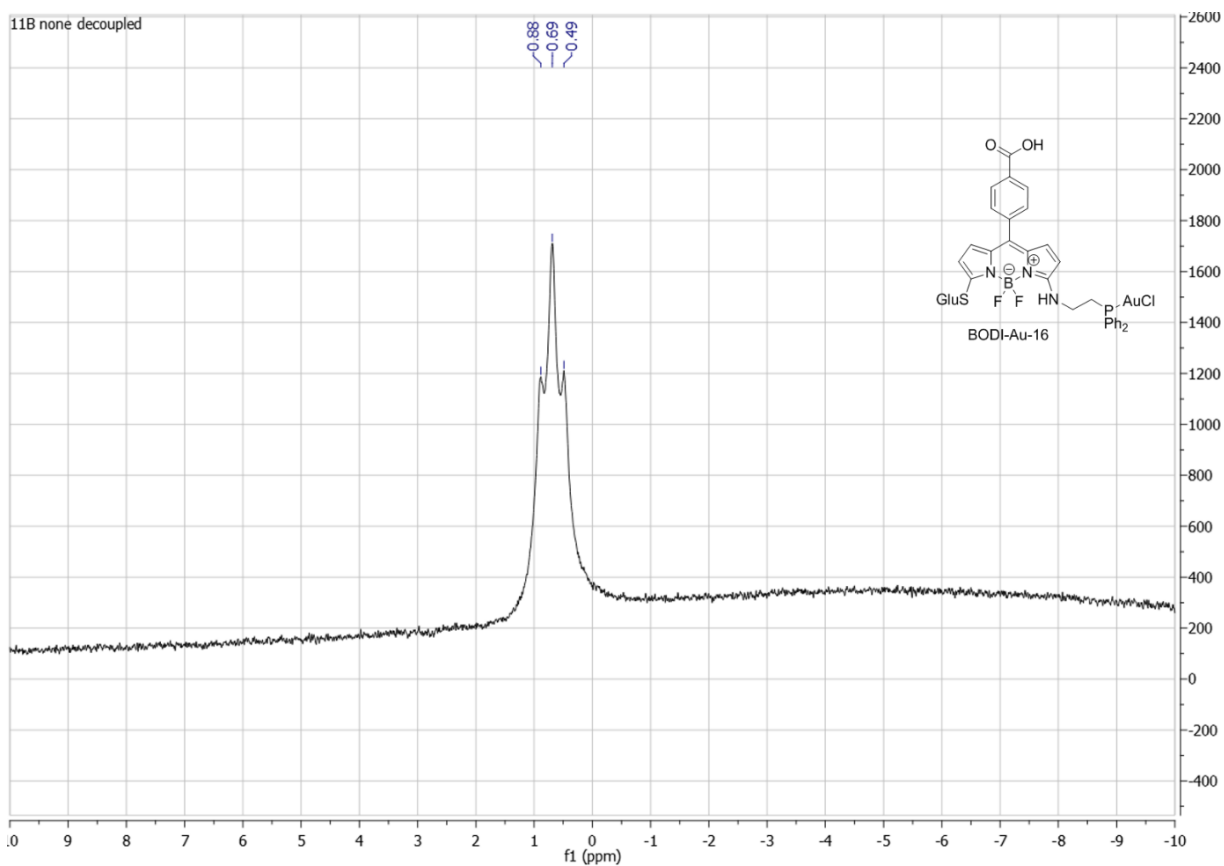

Figure S 92:  $^{11}\text{B}$  NMR of **BODI-Au-16** (DMSO, 160 MHz, 300K)

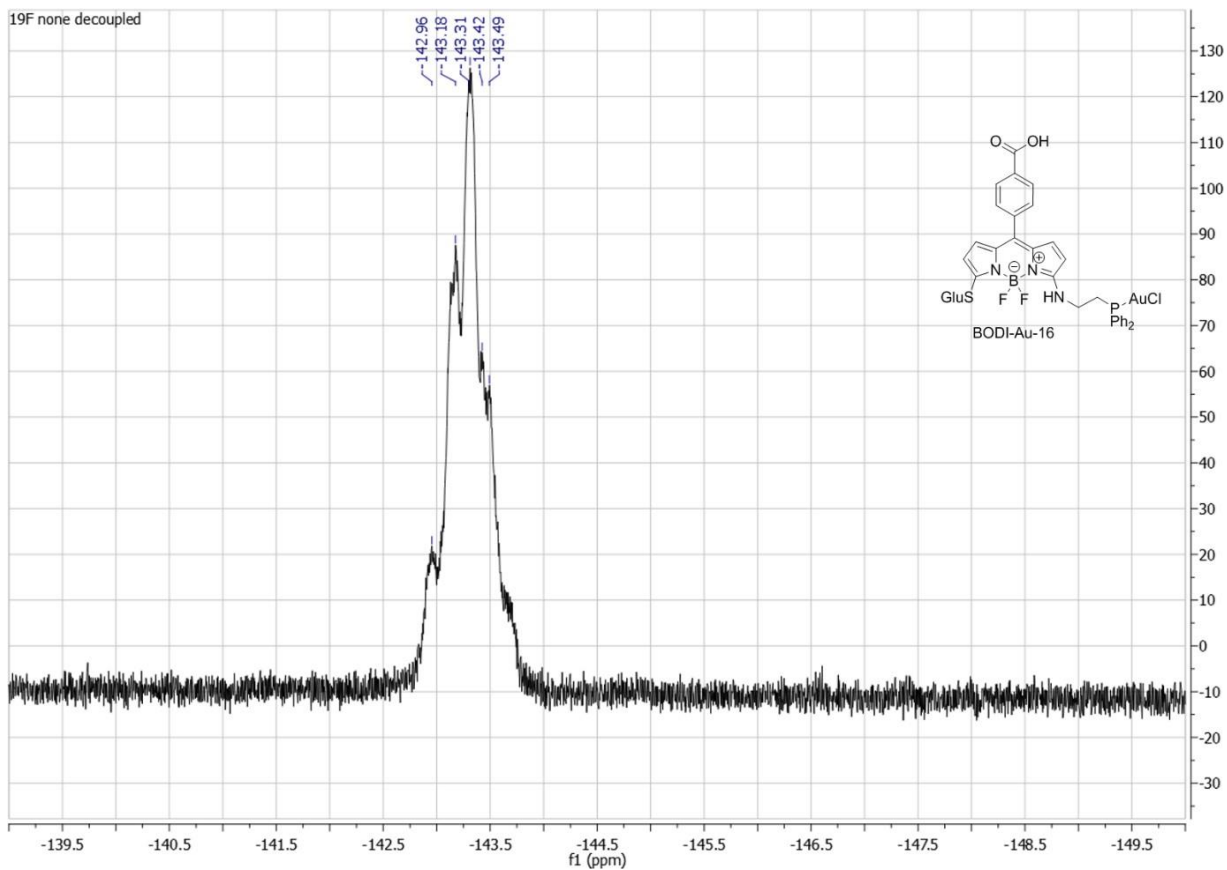

Figure S 93:  $^{19}\text{F}$  NMR of BODI-Au-16 (DMSO, 470 MHz, 300K)

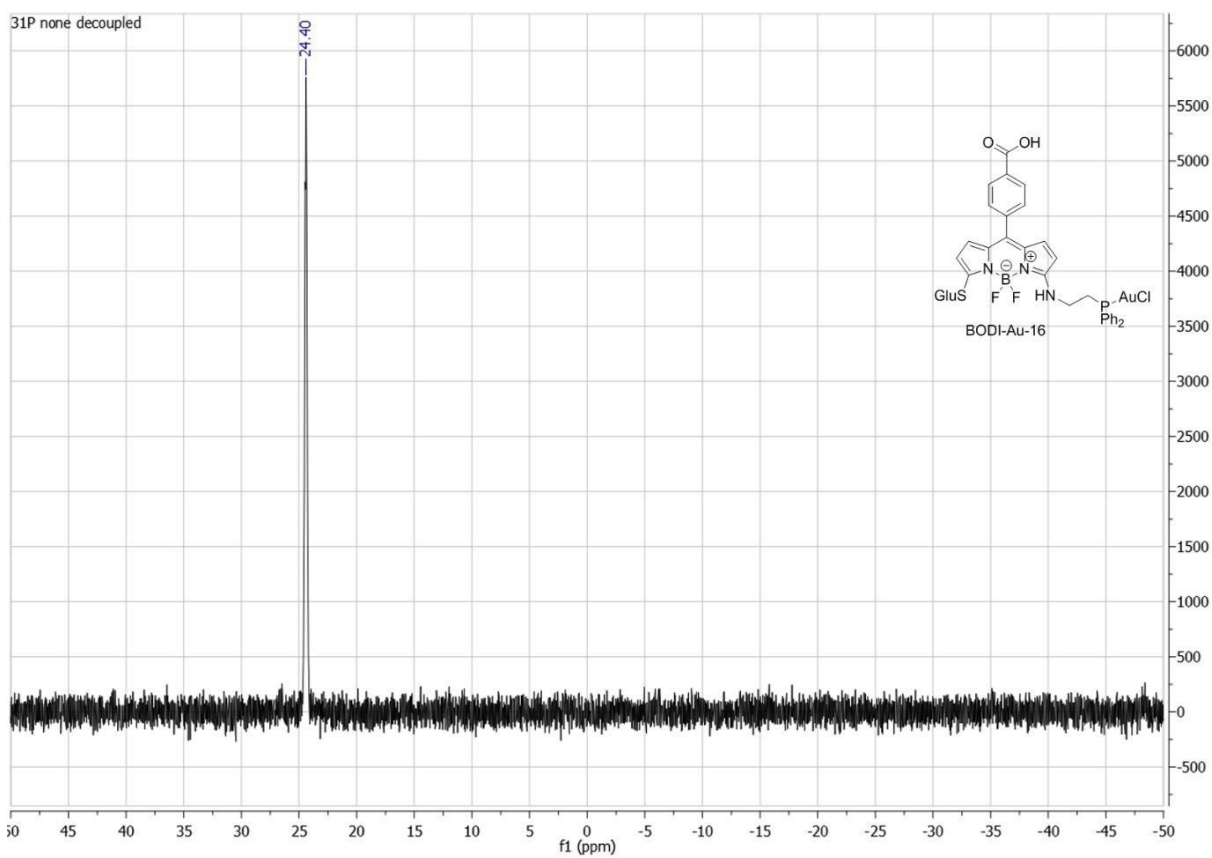

Figure S 94:  $^{31}\text{P}$  NMR of BODI-Au-16 (DMSO, 202 MHz, 300K)



## BODI-Au-17

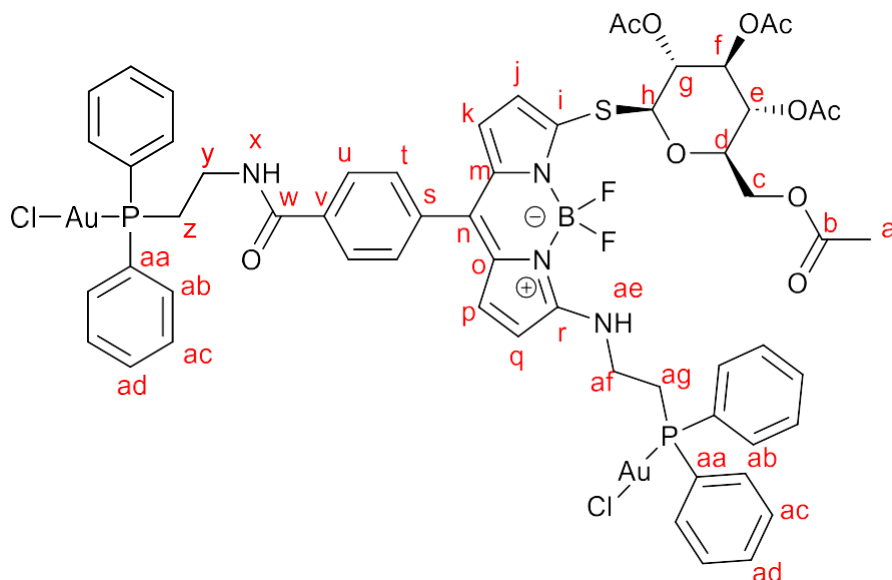

50mg (0.071mmol, 1eq) of BODIPY 7 were dissolved in 5 mL CH<sub>2</sub>Cl<sub>2</sub>. 30  $\mu$ L (0.35mmol, 5eq) of (COCl)<sub>2</sub> and a droplet of DMF were added and the reaction was stirred at room temperature. After 45min the solvents were evaporated and the resulting solid was redissolved in 15 mL CH<sub>3</sub>CN. 2-(Diphenylphosphino) ethylamine-aurochloride (78mg, 0.169mmol, 2.4eq) and NaHCO<sub>3</sub> (30mg, 0.35mmol, 5eq) were added and the reaction was refluxed for 60min. The solvent was evaporated and the crude product purified by column chromatography on silica gel, using CH<sub>2</sub>Cl<sub>2</sub>/MeOH (100:0 to 90:10) as eluent. The different product fractions were collected and evaporated to dryness. The product was dissolved in a minimal amount of CH<sub>2</sub>Cl<sub>2</sub> and crushed out by addition of pentane (twice) to obtain 102mg (65.32  $\mu$ mol, yield = 92%) of the target compound as a red-pink powder.

<sup>1</sup>H NMR (500 MHz, DMSO-D<sub>6</sub>)  $\delta$  (ppm) = 1.91, 1.94, 2.00, 2.01 (4s, 12H, H<sub>a</sub>), 3.10 (dt, *J* = 11.0, 6.9 Hz, 2H, H<sub>z</sub>), 3.18 - 3.13 (m, 2H, H<sub>ag</sub>), 3.58 (dt, *J* = 20.6, 6.7 Hz, 2H, H<sub>y</sub>), 3.69 (dt, *J* = 15.3, 7.8 Hz, 2H, H<sub>af</sub>), 4.06 (q, *J* = 5.1 Hz, 1H, H<sub>d</sub>), 4.17 (q, *J* = 5.1 Hz, 2H, H<sub>c</sub>), 4.95 (t, *J* = 9.7 Hz, 2H, H<sub>g</sub>, H<sub>e</sub>), 5.32 (d, *J* = 10.1 Hz, 1H, H<sub>h</sub>), 5.40 (t, *J* = 9.4 Hz, 1H, H<sub>f</sub>), 6.28 (d, *J* = 3.8 Hz, 1H, H<sub>q</sub>), 6.44 (d, *J* = 3.8 Hz, 1H, H<sub>p</sub>), 6.52 (d, *J* = 5.1 Hz, 1H, H<sub>j</sub>), 6.91 (d, *J* = 5.1 Hz, 1H, H<sub>k</sub>), 7.49 (d, *J* = 8.3 Hz, 2H, H<sub>t</sub>), 7.63 - 7.53 (m, 12H, H<sub>ac</sub>, H<sub>ad</sub>), 7.84 - 7.77 (m, 8H, H<sub>ab</sub>), 7.89 (d, *J* = 8.3 Hz, 2H, H<sub>u</sub>), 8.47 (s, 1H, H<sub>ae</sub>), 8.86 (t, *J* = 5.4 Hz, 1H, H<sub>x</sub>).

<sup>13</sup>C NMR (126 MHz, DMSO-D<sub>6</sub>)  $\delta$  (ppm) = 20.23 (s, C<sub>a</sub>), 20.3 (s, C<sub>a</sub>), 20.4 (s, C<sub>a</sub>), 20.5 (s, C<sub>a</sub>), 26.4 (d, *J* = 37.8 Hz, C<sub>y</sub>), 27.4 (d, *J* = 35.7 Hz, C<sub>af</sub>), 35.8 (d, *J* = 5.4 Hz, C<sub>z</sub>), 41.2 (d, *J* = 9.4 Hz, C<sub>ag</sub>), 61.9 (s, C<sub>c</sub>), 68.1 (s, C<sub>e</sub>), 69.3 (s, C<sub>f</sub>), 73.0 (s, C<sub>g</sub>), 74.3 (s, C<sub>d</sub>), 83.2 (s, C<sub>h</sub>), 113.4 (s, C<sub>q</sub>), 115.3 (s, C<sub>j</sub>), 118.5 (s, C<sub>p</sub>), 127.3 (s, C<sub>k</sub>), 127.7 (s, C<sub>o</sub>), 128.9 (dd, *J* = 60.7, 3.2 Hz, C<sub>aa</sub>), 129.0 (s, C<sub>m</sub>), 129.4 (dd, *J* = 11.6, 2.6 Hz, C<sub>ad</sub>), 129.5 (s, C<sub>v</sub>), 129.9 (s, C<sub>u</sub>), 132.0 (d, *J* = 16.9 Hz, C<sub>ac</sub>), 132.5 (s, C<sub>n</sub>), 133.1 (dd, *J* = 13.4, 1.6 Hz, C<sub>ab</sub>), 133.2 (s, C<sub>s</sub>), 134.3 (s, C<sub>r</sub>), 135.0 (s, C<sub>t</sub>), 136.5 (s, C<sub>i</sub>), 161.2 (s, C<sub>w</sub>), 169.0 (s, C<sub>a</sub>), 169.3 (s, C<sub>a</sub>), 169.4 (s, C<sub>a</sub>), 169.9 (s, C<sub>a</sub>).

<sup>11</sup>B NMR (160 MHz, DMSO-D<sub>6</sub>)  $\delta$  (ppm) = 1.04 - 0.40 (m).

<sup>19</sup>F NMR (470 MHz, DMSO-D<sub>6</sub>)  $\delta$  (ppm) = -142.79 - -143.80 (m).

<sup>31</sup>P NMR (202 MHz, DMSO-D<sub>6</sub>)  $\delta$  (ppm) = 24.62 - 24.15 (m, 1P), 25.32 - 24.77 (m, 1P).

<sup>31</sup>P {<sup>1</sup>H} NMR (202 MHz, DMSO-D<sub>6</sub>)  $\delta$  (ppm) = 24.42, 25.05.

HR-MS (ESI): *m/z* = calculated for C<sub>58</sub>H<sub>57</sub>Au<sub>2</sub>B<sub>1</sub>Cl<sub>2</sub>F<sub>2</sub>N<sub>4</sub>O<sub>10</sub>P<sub>2</sub>S<sub>1</sub>Na<sub>1</sub> [M+Na]<sup>+</sup> 1599.19321; found 1599.19617.

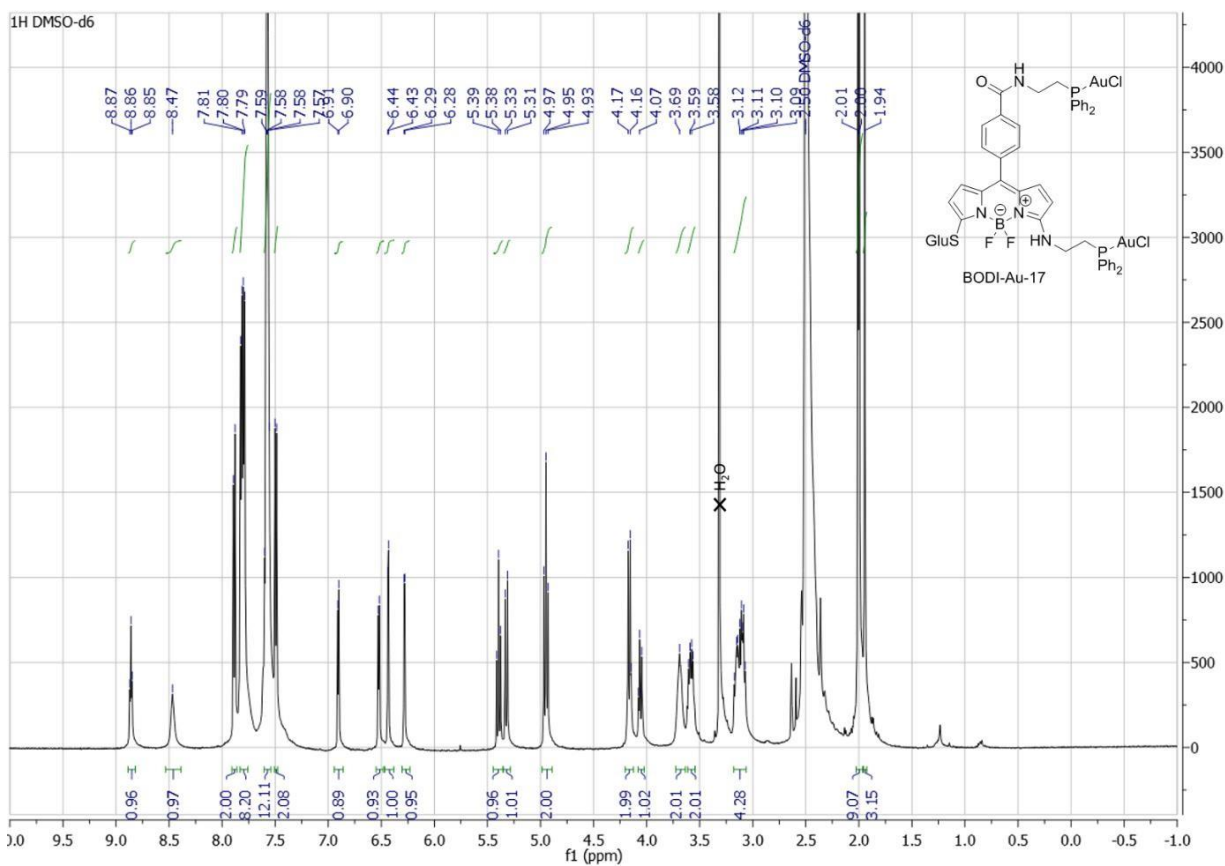

Figure S 95: <sup>1</sup>H NMR of BODI-Au-17 (DMSO, 500 MHz, 300K)

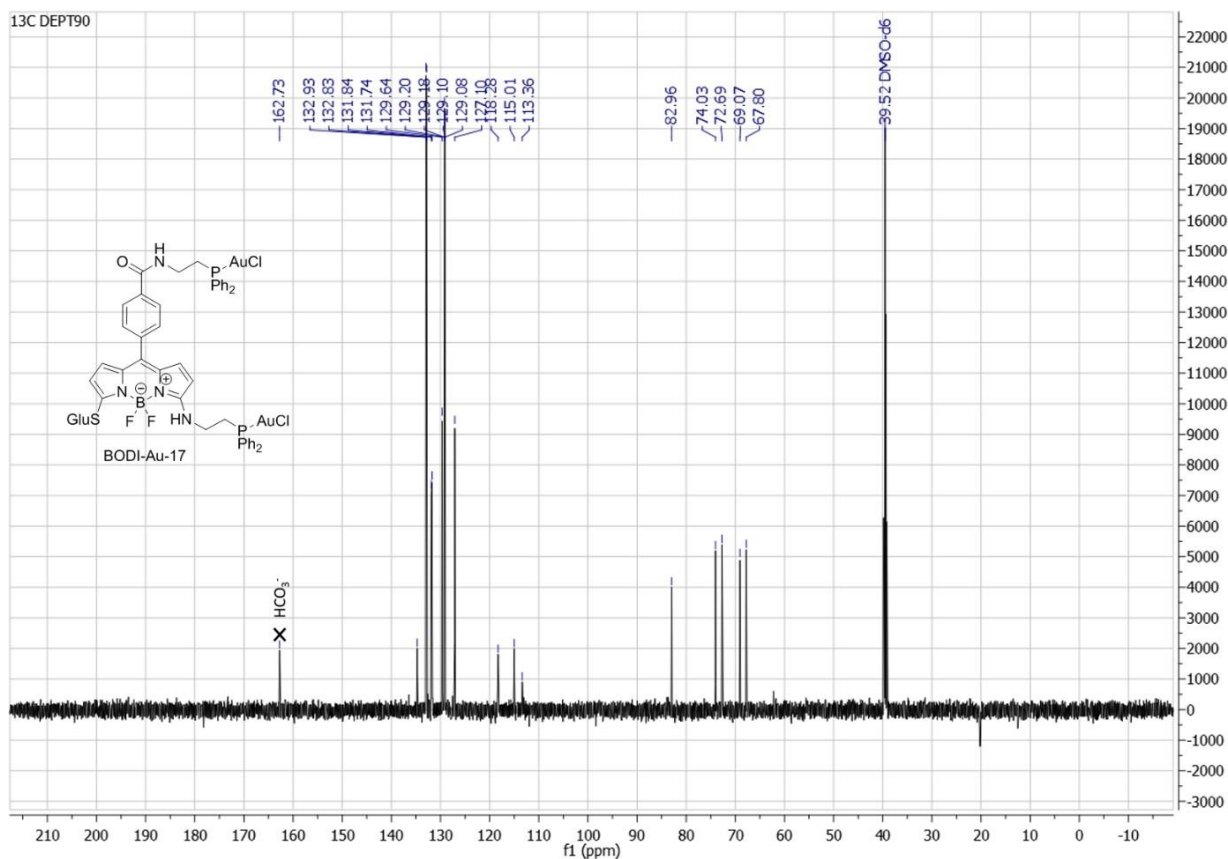

Figure S 96: <sup>13</sup>C NMR (DEPT90) of BODI-Au-17 (DMSO, 126 MHz, 300K)

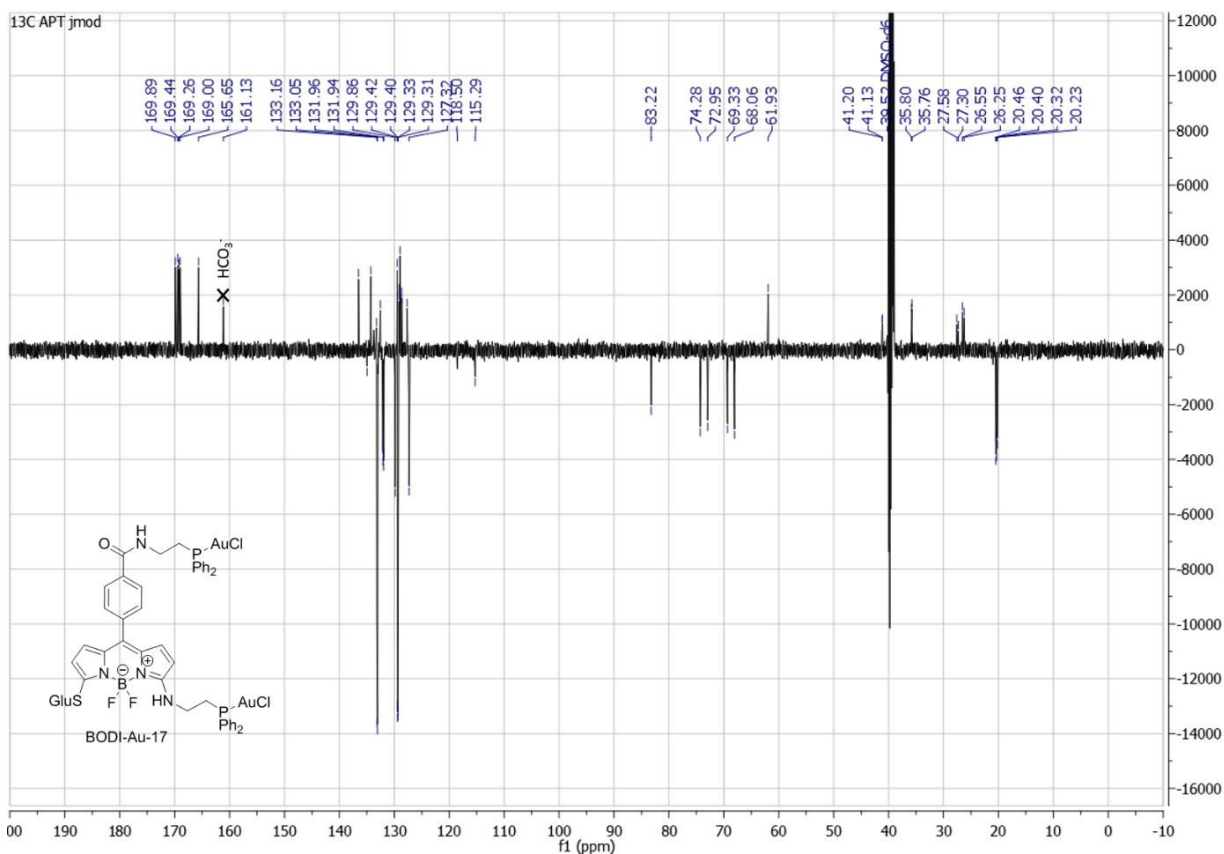

Figure S 97:  $^{13}\text{C}$  NMR (APT jmod) of BODI-Au-17 (DMSO, 126 MHz, 300K)

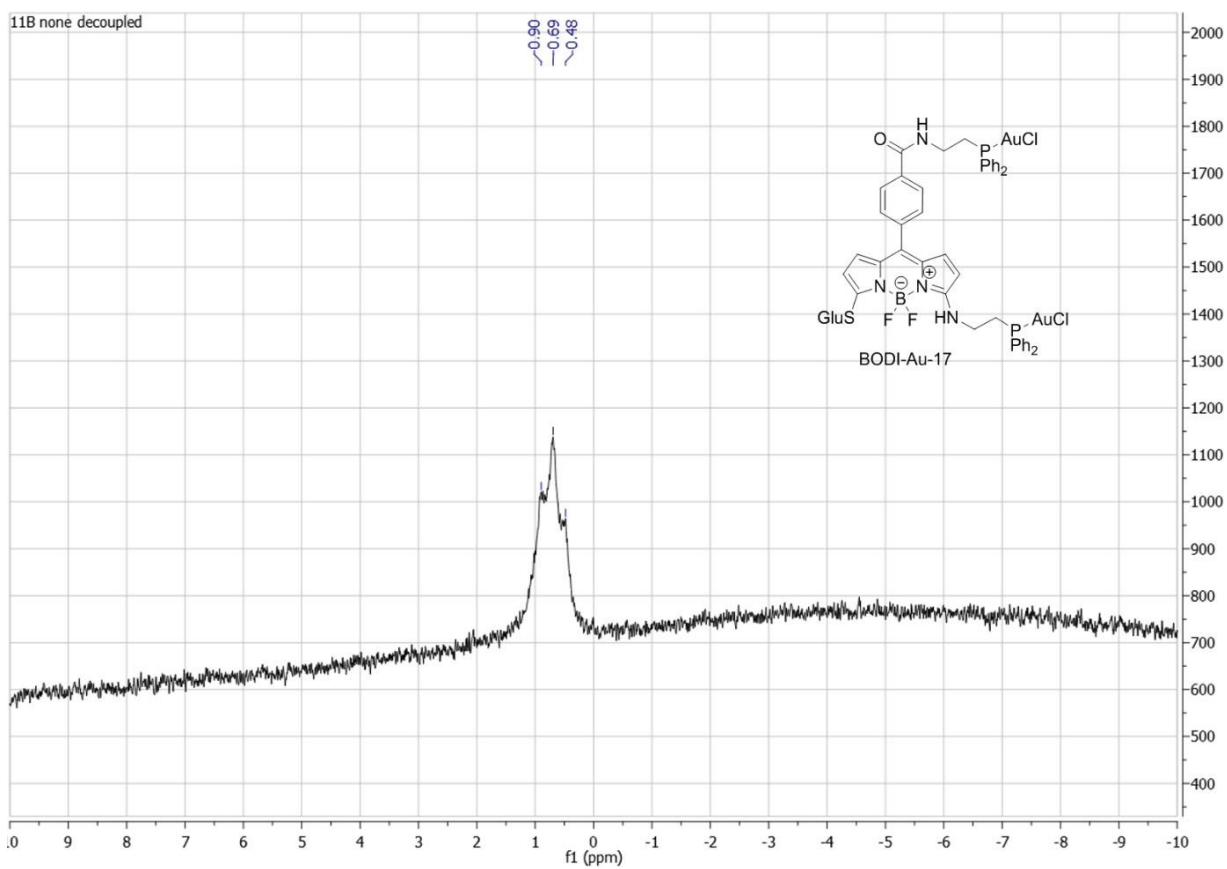

Figure S 98:  $^{11}\text{B}$  NMR of BODI-Au-17 (DMSO, 160 MHz, 300K)

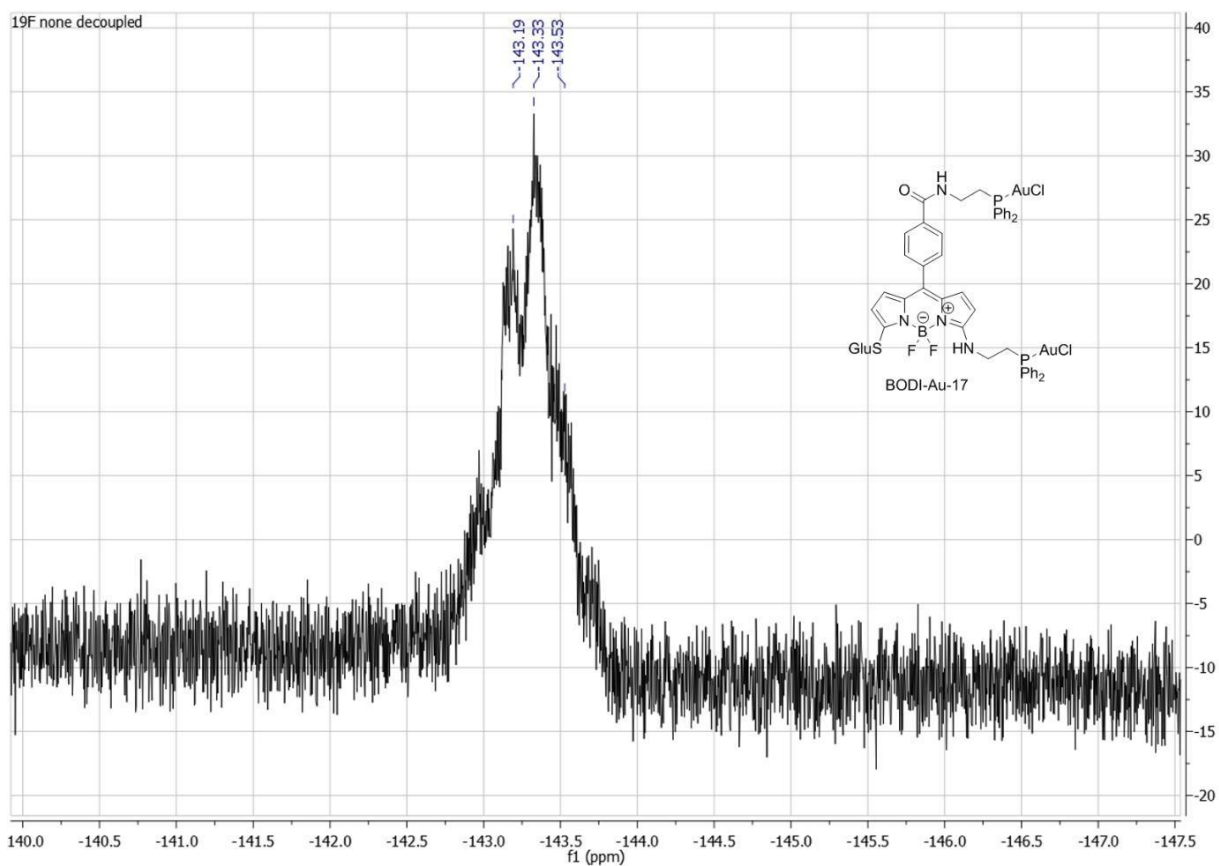

Figure S 99:  $^{19}\text{F}$  NMR of BODI-Au-17 (DMSO, 470 MHz, 300K)

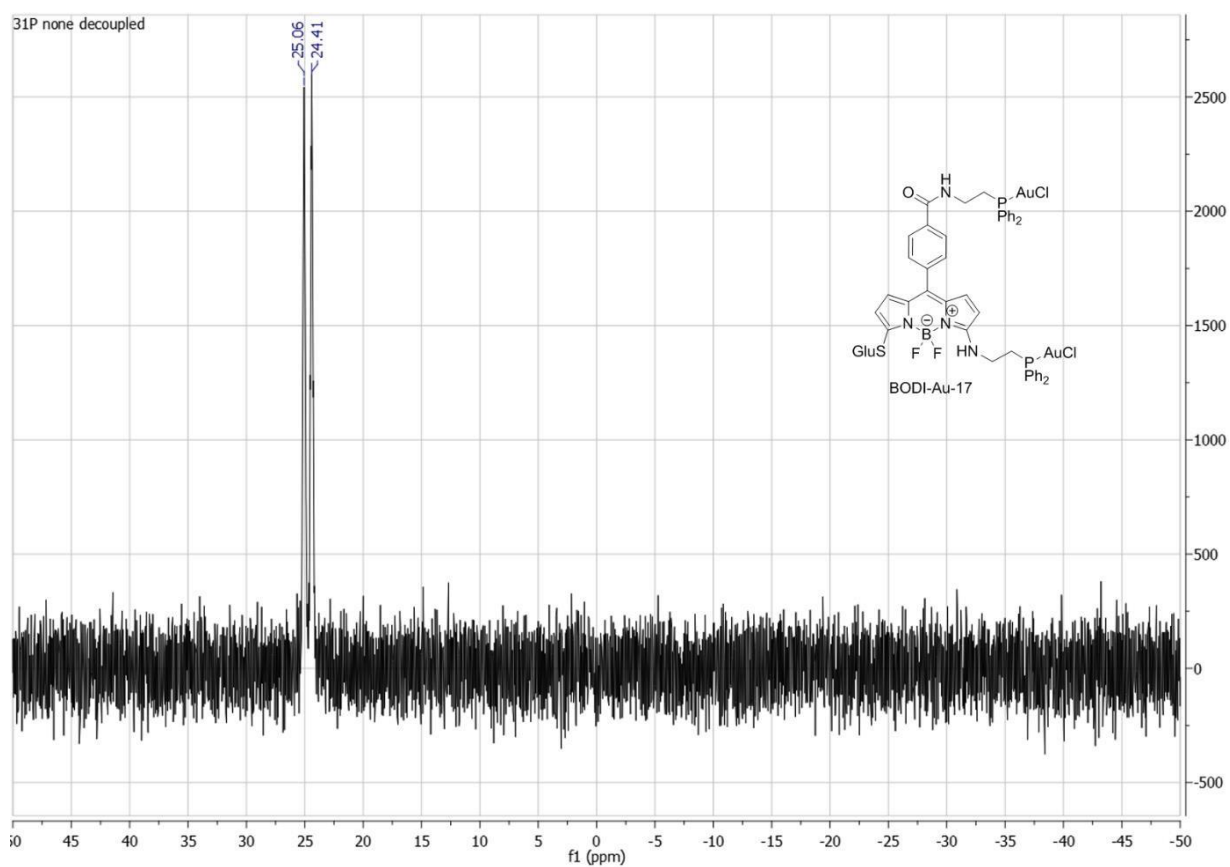

Figure S 100:  $^{31}\text{P}$  NMR of BODI-Au-17 (DMSO, 202 MHz, 300K)

## Photophysical data

UV-Visible absorption spectra were recorded on a JASCO V630BIO spectrometer. The steady-state fluorescence emission spectra were obtained by using a JASCO

FP8560 spectrofluorometer instrument. All fluorescence spectra were corrected for instrument response. The fluorescence quantum yields ( $\Phi_F$ ) were calculated from equation:

$$\frac{\Phi_F}{\Phi_{FR}} = \frac{n^2}{n_R^2} \times \frac{\int_0^{\infty} I_F(\lambda_E, \lambda_F) d\lambda_F}{\int_0^{\infty} I_{FR}(\lambda_E, \lambda_F) d\lambda_F} \times \frac{1 - 10^{-A_R(\lambda_E)}}{1 - 10^{-A(\lambda_E)}}$$

$\Phi_F$  and  $\Phi_{FR}$  are fluorescence quantum yields of the compound and the reference respectively.  $A(\lambda_E)$  and  $A_R(\lambda_E)$  are the absorbance at the excitation wavelength, and  $n$  is the refractive index of the medium.  $I_F$  and  $I_{FR}$  are fluorescent intensities of the compound and the reference respectively. Rhodamine 6G ( $\Phi = 0.94$  in EtOH,  $\lambda_{ex} = 488$  nm) was used as the standard.<sup>4</sup> In all  $\Phi_F$  determinations, correction for the solvent refractive index ( $\eta$ ) was applied.

Table S 1: Photophysical data and spectra of the different BODIPY derivatives in DMSO at 293K.

| Compound   | Structure                                                                           | $\lambda_{abs}$ (nm) | $\lambda_{em}$ (nm) <sup>a</sup> | $\epsilon$ (M <sup>-1</sup> .cm <sup>-1</sup> ) | $\Phi_f$ (%) <sup>b</sup> |
|------------|-------------------------------------------------------------------------------------|----------------------|----------------------------------|-------------------------------------------------|---------------------------|
| 1          |    | 514                  | 530                              | 76,000                                          | 13                        |
| 2          |    | 518                  | 538                              | 69,000                                          | 5                         |
| 3          |   | 517                  | 537                              | 66,000                                          | 6                         |
| 4          |  | 538                  | 553                              | 73,000                                          | 39                        |
| 5          |  | 516                  | 531                              | 125,000                                         | 8                         |
| 6          |  | 541                  | 559                              | 48,000                                          | 23                        |
| 7          |  | 540                  | 555                              | 75,000                                          | 26                        |
| 8          |  | 525                  | 567                              | 29,000                                          | 21                        |
| BODI-Au-7  |  | 476                  | 538                              | 33,000                                          | 24                        |
| BODI-Au-8  |  | 476                  | 538                              | 35,000                                          | 23                        |
| BODI-Au-9  |  | 508                  | 565                              | 31,000                                          | 28                        |
| BODI-Au-10 |  | 516                  | 533                              | 81,000                                          | 8                         |
| BODI-Au-11 |  | 479                  | 544                              | 31,000                                          | 21                        |
| BODI-Au-12 |  | 479                  | 543                              | 34,000                                          | 24                        |
| BODI-Au-13 |  | 480                  | 546                              | 30,000                                          | 15                        |
| BODI-Au-14 |  | 480                  | 546                              | 26,000                                          | 18                        |
| BODI-Au-15 |  | 523                  | 569                              | 16,000                                          | 21                        |
| BODI-Au-16 |  | 513                  | 570                              | 24,000                                          | 15                        |
| BODI-Au-17 |  | 511                  | 569                              | 31,000                                          | 24                        |

<sup>a</sup>:  $\lambda_{ex} = 488$  nm; <sup>b</sup>: Rhodamine 6G ( $\Phi = 0.94$  in EtOH,  $\lambda_{ex} = 488$  nm) was used as the standard.<sup>4</sup>

### BODIPY 1

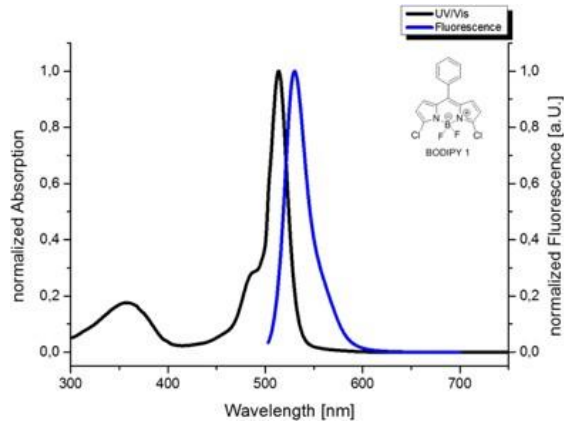

### BODIPY 2

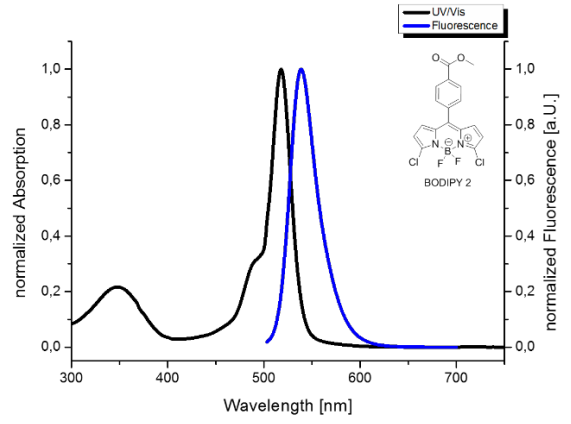

### BODIPY 3

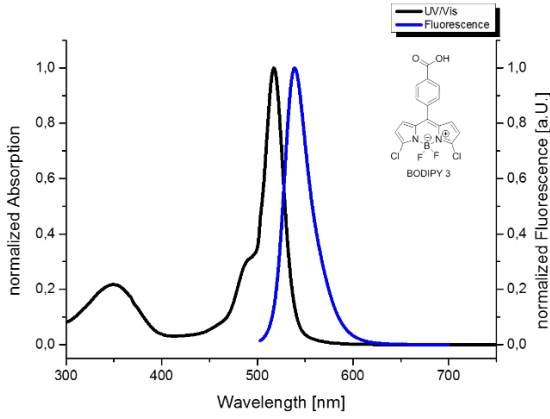

### BODIPY 4

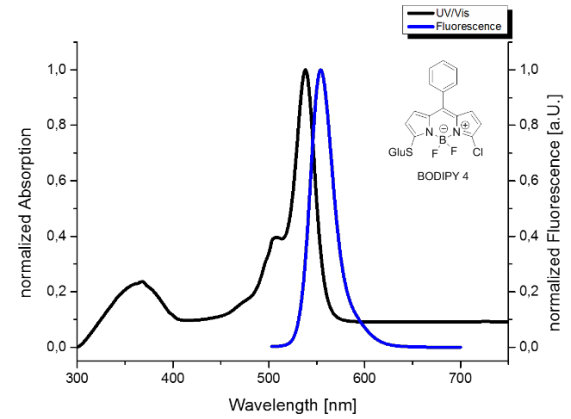

### BODIPY 5

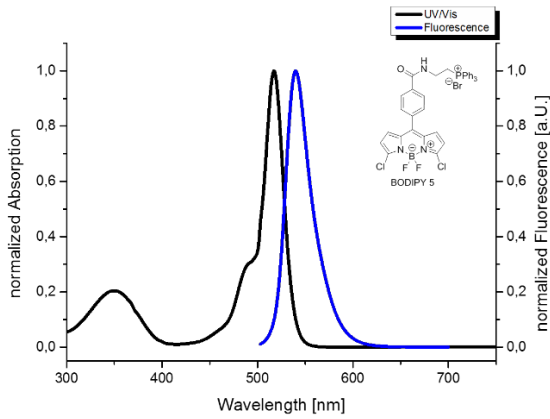

### BODIPY 6

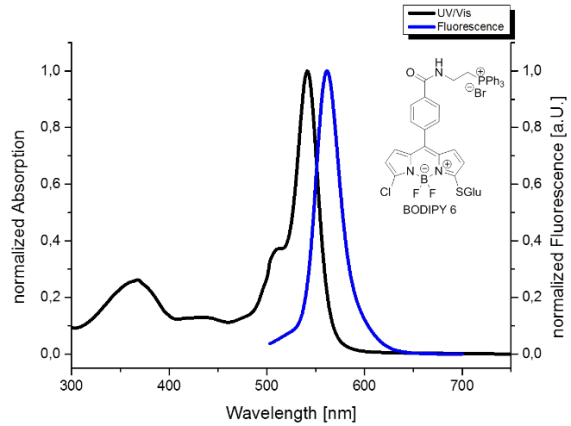

### BODIPY 7

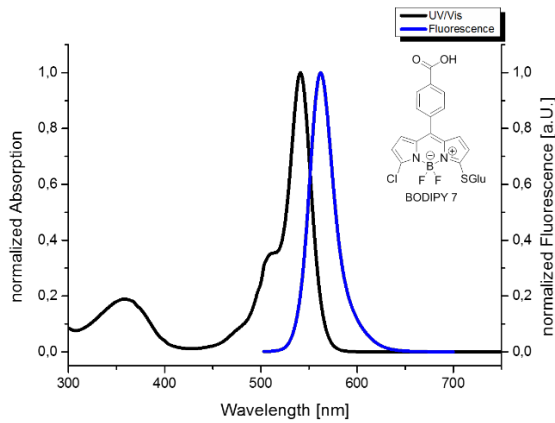

### BODIPY 8

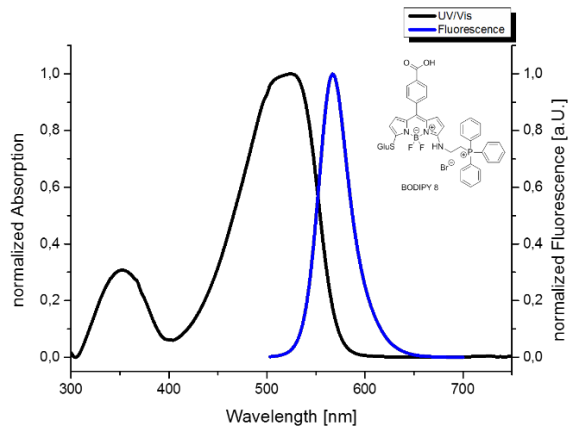

**BODI-Au-7**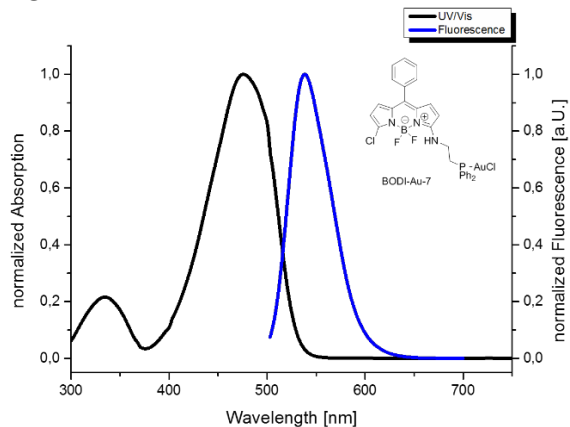**BODI-Au-8**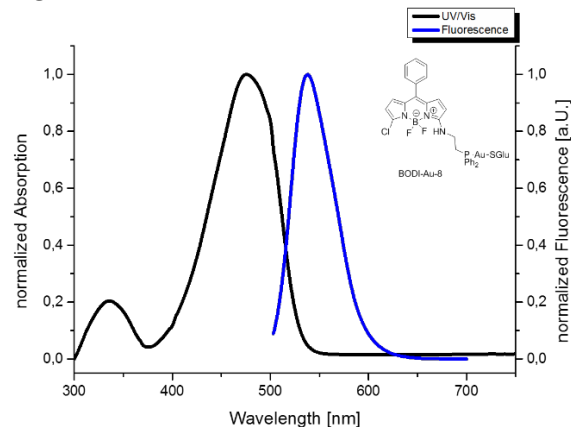**BODI-Au-9**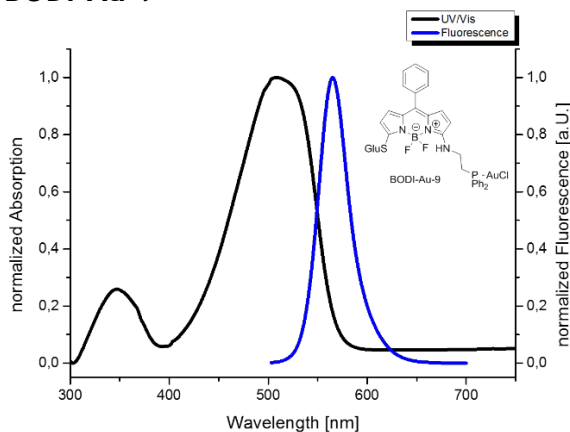**BODI-Au-10**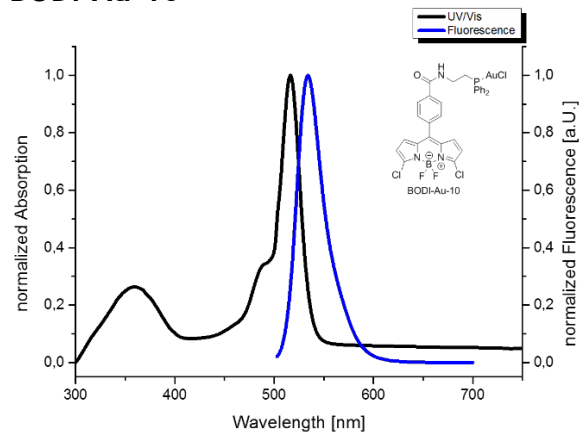**BODI-Au-11**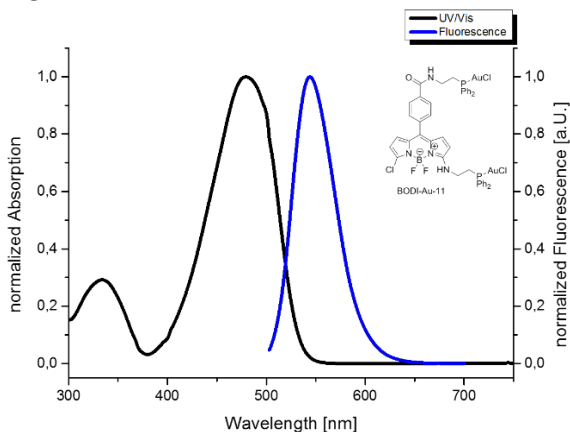**BODI-Au-12**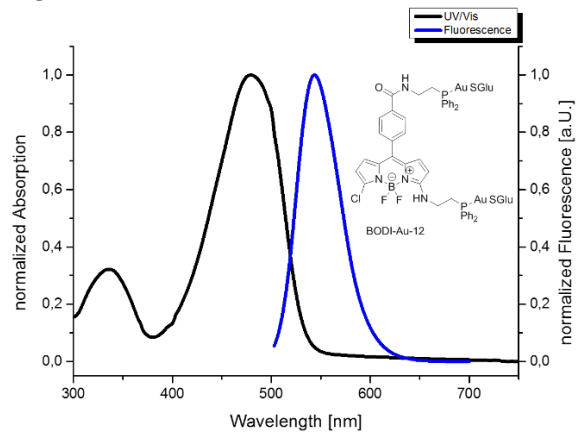**BODI-Au-13**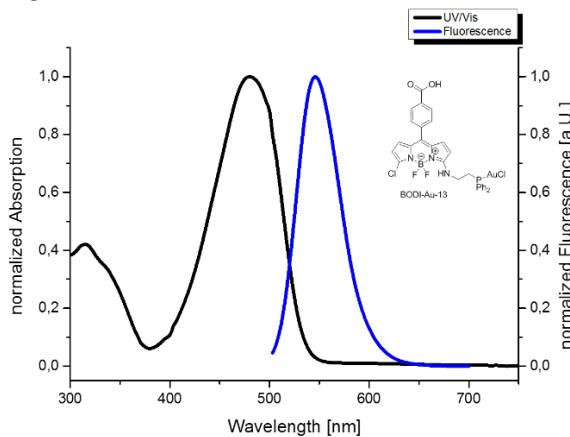**BODI-Au-14**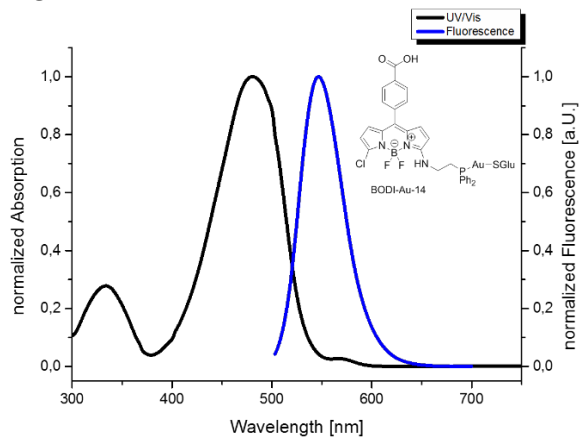

**BODI-Au-15**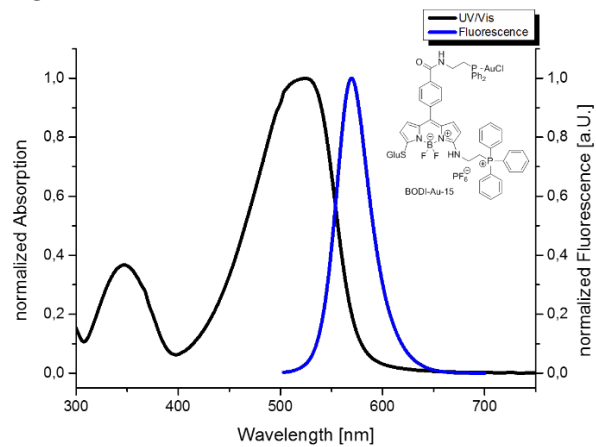**BODI-Au-16**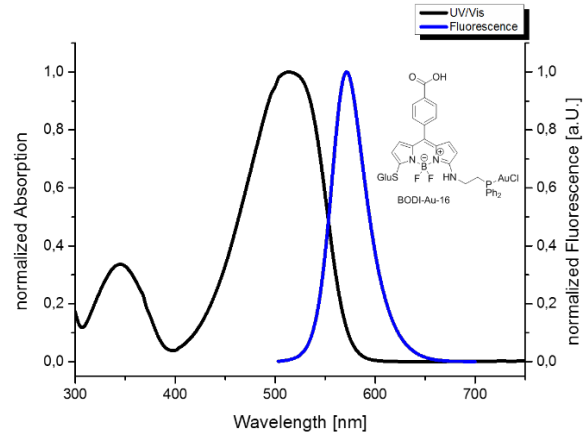**BODI-Au-17**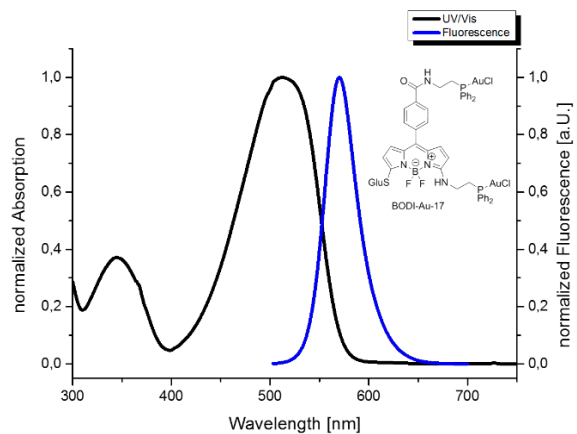

Figure S101: Normalized absorption (black) and emission ( $\lambda_{\text{ex}} = 488 \text{ nm}$ ) (blue) of BODIPY derivatives in DMSO at room temperature.



# Theoretical calculation

## Computational details

All DFT calculations were carried out Gaussian 09 (Gaussian 09, Revision D.01, M. J. Frisch, G. W. Trucks, H. B. Schlegel, G. E. Scuseria, M. A. Robb, J. R. Cheeseman, G. Scalmani, V. Barone, G. A. Petersson, H. Nakatsuji, I. Li, M. Caricato, A. Marenich, J. Bloino, B. G. Janesko, R. Gomperts, B. Mennucci, H. P. Hratchian, J. V. Ortiz, A. F. Izmaylov, J. L. Sonnenberg, D. Williams-Young, F. Ding, F. Lipparini, F. Egidi, J. Goings, B. Peng, A. Petrone, T. Henderson, D. Ranasinghe, V. G. Zakrzewski, J. Gao, N. Rega, G. Zheng, W. Liang, M. Hada, M. Ehara, K. Toyota, R. Fukuda, J. Hasegawa, M. Ishida, T. Nakajima, Y. Honda, O. Kitao, H. Nakai, T. Vreven, K. Throssell, J. A. Montgomery, Jr., J. E. Peralta, F. Ogliaro, M. Bearpark, J. J. Heyd, E. Brothers, K. N. Kudin, V. N. Staroverov, T. Keith, R. Kobayashi, J. Normand, K. Raghavachari, A. Rendell, J. C. Burant, S. S. Iyengar, J. Tomasi, M. Cossi, J. M. Millam, M. Klene, C. Adamo, R. Cammi, J. W. Ochterski, R. L. Martin, K. Morokuma, O. Farkas, J. B. Foresman, and D. J. Fox, Gaussian, Inc., Wallingford CT, 2016.), tightening self-consistent field convergence thresholds ( $10^{-10}$  a.u.). A 6-31G(d) basis set and the hybrid functional M06-2X<sup>6</sup> were employed given the good performance of such scheme in other studies.<sup>7,8</sup> The DMSO solvent effects were included according to the Polarizable Continuum Model.<sup>9,10</sup> The LUMO isosurfaces have been plotted with the Chemcraft code<sup>11</sup> considering a contour threshold of 0.05 a.u.

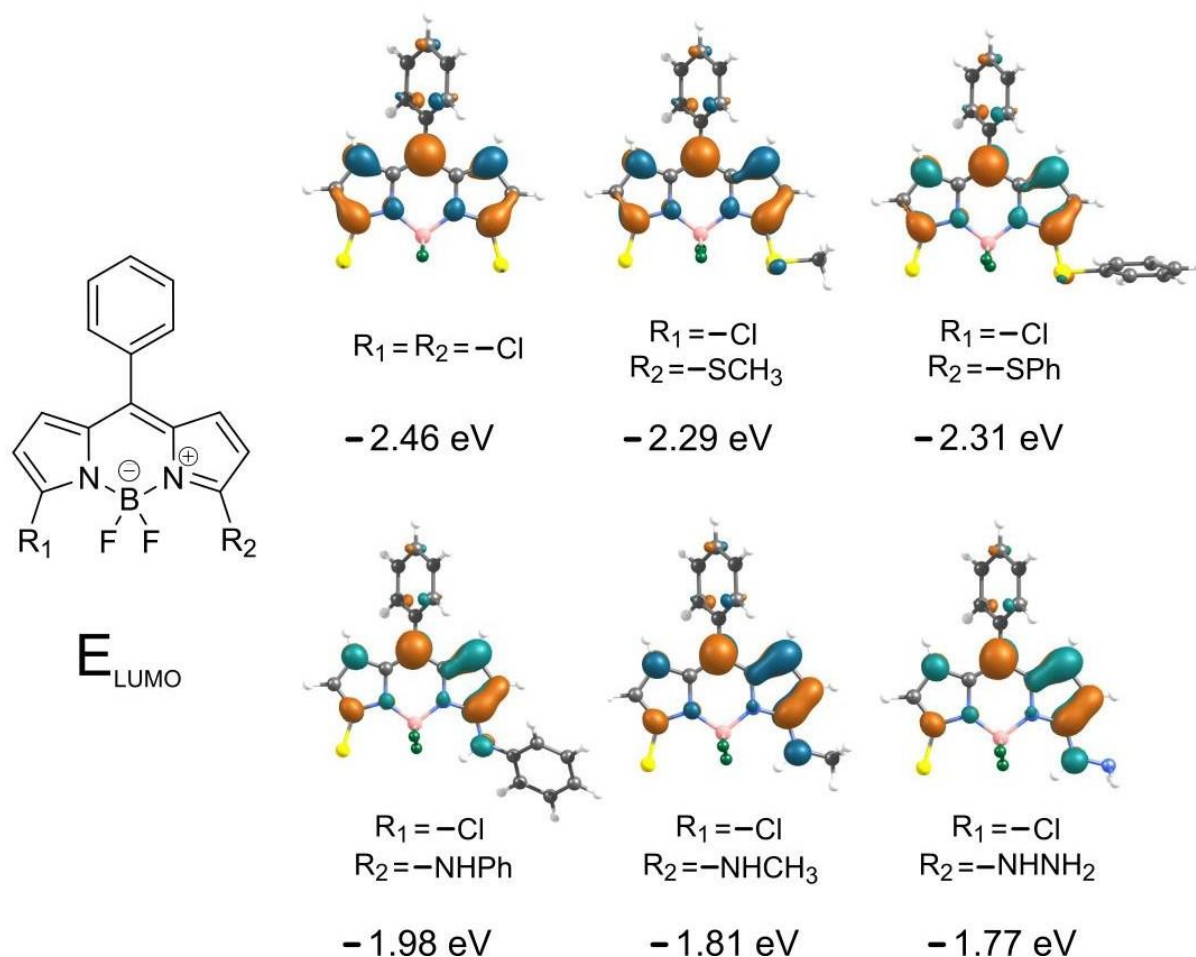

Figure S 102: LUMO energies (eV) for some model systems

## Results and Discussion

We conducted DFT calculations at the M06-2X/6-31G(d) level to determine the lowest unoccupied molecular orbital energy ( $E_{\text{LUMO}}$ ) for some model systems containing amino- and thio-groups, bearing in mind that this value can be associated to the electrophilicity of the

molecule.<sup>12,13</sup> Then, the higher  $E_{\text{LUMO}}$ , the lower the probability of the molecule to experience a nucleophilic attack.

In Figure S 102 we can observe the graphical representation of the LUMO, which is mainly distributed over the dipyrromethene core in all systems. Remarkably, the small contribution of the phenyl ring at the *meso* position evidences the poor conjugation between this fragment and the boron-dipyrromethene moiety given the broad dihedral angle between them.

The replacement of a chlorine atom by an amino-/thio- substituent leads to an  $E_{\text{LUMO}}$  increase with respect to the dichloro- starting compound. This effect is more pronounced for the amino-substituted BODIPYs ( $\Delta E_{\text{LUMO}} \sim 0.61$  eV) than for their thio-substituted counterparts ( $\Delta E_{\text{LUMO}} \sim 0.16$  eV). These calculated values are in good agreement with experimental data related to the great difficulty to incorporate a second group to the amino-substituted BODIPYs.

In summary, our results evidence how the higher electron-donor behavior of the amino-substituents increases the LUMO energy in a larger extent than the thio- groups, resulting in a minor reactivity of the BODIPY toward a nucleophilic substitution.

Additionally, we have estimated the reaction energies for (a) the incorporation of an aminomethyl group in the thio-substituted BODIPY and (b) the incorporation of a thiomethyl in the amino-substituted BODIPY, both process leading to the same products. We found that reaction (a) is the more exothermic process releasing more than three times the energy of (b).

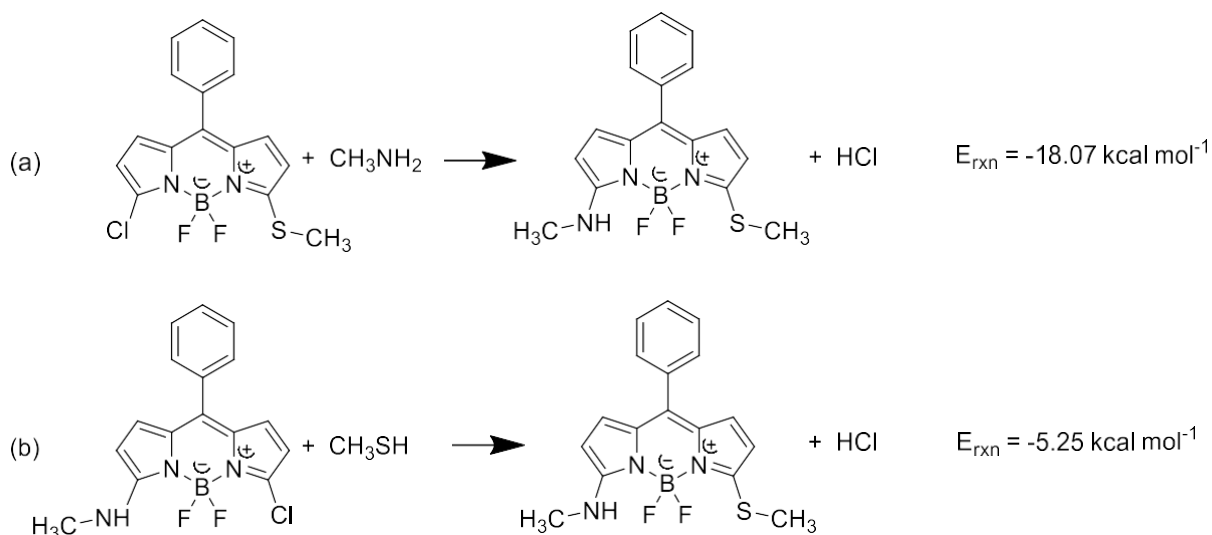

Scheme S 1: Some hypothetical reactions involving the model systems.

The energy release associated to the substituents incorporation is calculated, resulting in a more exothermic process when the thiomethyl is first added to the BODIPY, followed by the aminomethyl.

## Determination of cytotoxic properties

5 mM stock solutions were prepared by dissolving the compounds in DMSO.  $10^5$  cells were seeded in 96-well flat-bottomed microplates (final volume 100  $\mu$ L per well) and incubated for 24h to allow for cell adherence. The medium was then replenished with 100  $\mu$ L fresh medium containing the compounds to be tested at increasing concentrations (ranging from 0.5 to 150  $\mu$ M) at 37°C for 48h. The cytotoxic activity of compounds and drug references was determined using the MTS assay (Promega®). The assay is based on the reduction of a tetrazolium compound to a colored formazan in the presence of an electron coupling reagent (phenazine ethosulfate; PES) and NADH/NADPH produced by metabolically active cells. Thereafter, 10  $\mu$ L of MTS (3-(4,5-dimethylthiazol-2-yl)-5-(3-carboxymethoxyphenyl)-2-(4-sulfophenyl)-2H-tetrazolium, Promega, Charbonnieres, France) was added in 200  $\mu$ L of medium and absorbance at 490 nm was measured after 3h incubation at 37°C. The resulting IC<sub>50</sub> values were calculated using GraphPad Prism 5.0 software. Each treatment was performed in three independent experiments.

Table S2: Determination of the IC<sub>50</sub> values ( $\mu$ M) of the different BODIPY derivatives on MDA-MB-231, EMT6, and B16F10 cell lines by MTS assay (Promega®) at 48h and comparison to auranofin (Results are the mean SD of 3 independent experiments).

| Compound          | MDA-MB-231 |              | EMT6  |              | B16-F10 |              |
|-------------------|------------|--------------|-------|--------------|---------|--------------|
| 1                 | 75.05      | $\pm 0,2212$ | 50.21 | $\pm 0,4385$ | 74.87   | $\pm 0,16$   |
| 3                 | 74.83      | $\pm 0,3037$ | 49.76 | $\pm 0,3957$ | 50.12   | $\pm 0,123$  |
| 4                 | 19.76      | $\pm 0,2150$ | 19.75 | $\pm 0,1521$ | 19.89   | $\pm 0,1193$ |
| 5                 | 25.19      | $\pm 0,0897$ | 24.94 | $\pm 0,1404$ | 25.02   | $\pm 0,0907$ |
| 6                 | 74.92      | $\pm 0,2841$ | 50.2  | $\pm 0,2056$ | 100     | $\pm 0,1109$ |
| 7                 | 74.96      | $\pm 0,1629$ | 49.61 | $\pm 0,2509$ | 74.9    | $\pm 0,1949$ |
| <b>BODI-Au-7</b>  | 25.24      | $\pm 0,1194$ | 10.58 | $\pm 0,0947$ | 49.97   | $\pm 0,13$   |
| <b>BODI-Au-8</b>  | 29.79      | $\pm 0,1279$ | 19.73 | $\pm 0,1815$ | 20.16   | $\pm 0,3106$ |
| <b>BODI-Au-9</b>  | 75         | $\pm 0,1866$ | 49.88 | $\pm 0,1834$ | 74.94   | $\pm 0,168$  |
| <b>BODI-Au-10</b> | 75.23      | $\pm 0,2125$ | 74.93 | $\pm 0,3894$ | 75.05   | $\pm 0,1981$ |
| <b>BODI-Au-11</b> | 49.97      | $\pm 0,1875$ | 74.78 | $\pm 0,3134$ | 74.93   | $\pm 0,18$   |
| <b>BODI-Au-12</b> | 50.03      | $\pm 0,1793$ | 49.91 | $\pm 0,1913$ | 49.8    | $\pm 0,1672$ |
| <b>BODI-Au-13</b> | 25.17      | $\pm 0,1532$ | 19.96 | $\pm 0,1204$ | 49.9    | $\pm 0,14$   |
| <b>BODI-Au-14</b> | 10.07      | $\pm 0,1932$ | 9.908 | $\pm 0,0980$ | 10.32   | $\pm 0,2128$ |
| <b>BODI-Au-15</b> | 75         | $\pm 0,1935$ | 40.4  | $\pm 0,2409$ | 100.2   | $\pm 0,1390$ |
| <b>BODI-Au-16</b> | 50.1       | $\pm 0,1516$ | 50.13 | $\pm 0,1378$ | 24.88   | $\pm 0,2729$ |
| <b>BODI-Au-17</b> | 100.2      | $\pm 0,1991$ | 49.92 | $\pm 0,1705$ | 100.1   | $\pm 0,1343$ |
| Auranofin         | 5.225      | $\pm 0,0942$ | 4.865 | $\pm 0,1154$ | 4.683   | $\pm 0,1573$ |

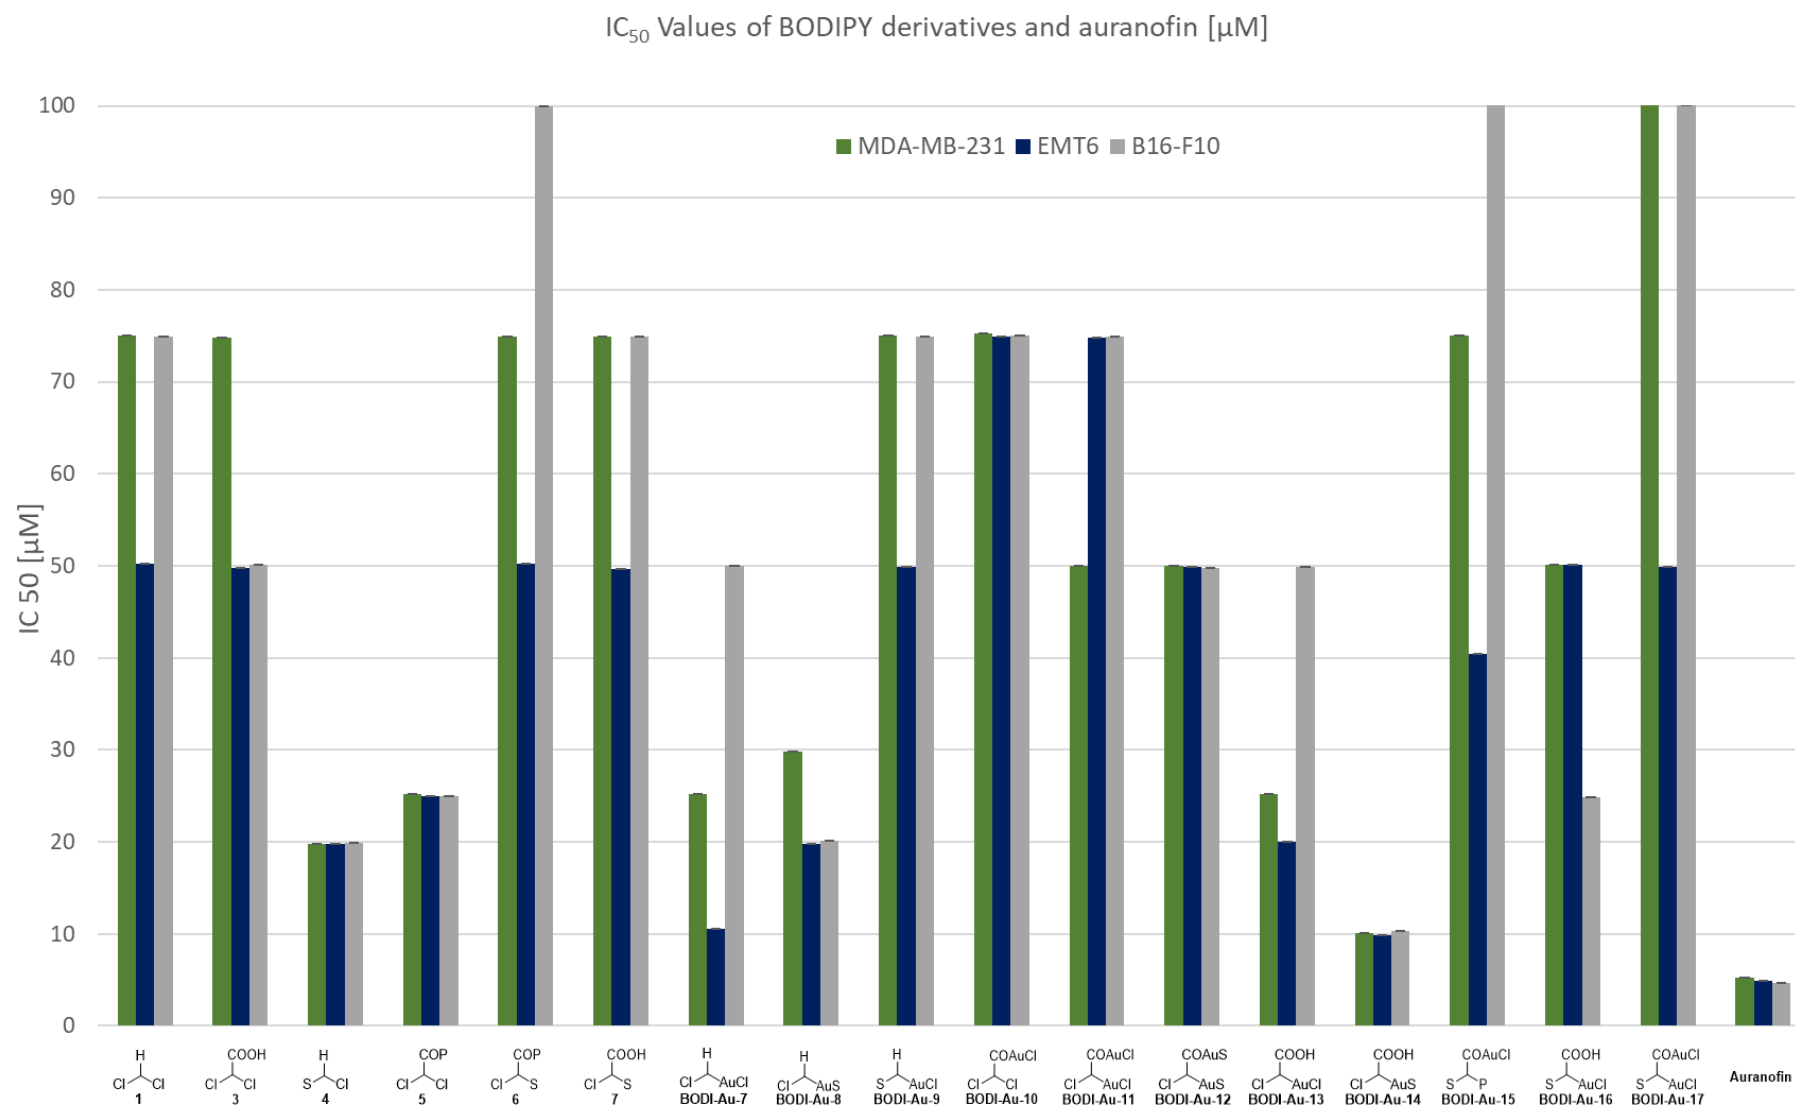

Figure S 103: Determination of the IC<sub>50</sub> values ( $\mu\text{M}$ ) of the different BODIPY derivatives on MDA-MB-231, EMT6, and B16F10 cell lines by MTS assay (Promega®) at 48 h and comparison to auranofin (Results are the mean SD of 3 independent experiments).

## *In vitro* confocal microscopy experiments

MDA-MB-231 cells were seeded on chambered coverglasses (24 well-plate) and allowed to recover. Cells were incubated with 10  $\mu\text{M}$  of each compound at 37°C. After 1, 4 and 24 hours the cells were fixed and permeabilized with iced methanol for 10 min at room temperature. Cells were then washed 3 times with PBS (5 min each), counterstained with 5  $\mu\text{M}$  DRAQ5 (or 1  $\mu\text{g}\cdot\text{mL}^{-1}$  DAPI) during 5-10 min, washed with PBS and mounted with Fluoromount-G® (Southern Biotech). Confocal imaging was performed using a confocal laser-scanning microscope (Leica TCS SP8) with a  $\times 63$  HCX PLAPO oil immersion (ON 1.4) objective lens that allowed to simultaneously obtain DIC (Differential Interference Contrast) and fluorescent images (1024 pixels  $\times$  1024 pixels), and LASX software (Leica Microsystems, Ltd). The samples were excited using internal microscope lasers and emission intensity was recorded at the appropriate emission wavelength. Fluorescence images were sequentially acquired. For co-localization experiments, BODIPY compounds (green) were excited at 488 nm and their emission was recorded from 493 to 600 nm (BODIPY-FI), whereas the nuclear probe, the DRAQ5 (red), was excited at 638 nm and its emission was recorded from 661 nm to 778 nm (DRAQ5). Image processing and analyses were carried out using Fiji/ImageJ.

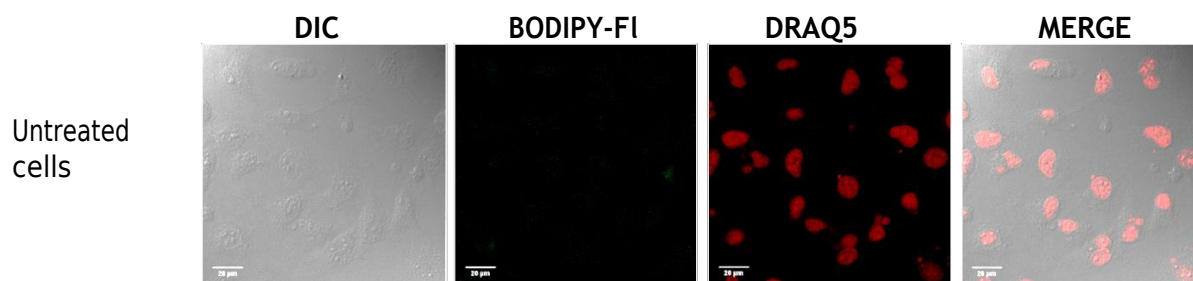

Figure S 104: Confocal immunofluorescent analysis of MDA-MB-231 labelled only with DRAQ5 (DIC: bright field, BODIPY-FI: BODIPY fluorescence canal, DRAQ5: DRAQ5 canal). Cells are incubated with 10  $\mu\text{M}$  BODIPY derivatives (green) for 4h at 37°C then fixed, permeabilized with iced methanol. The nuclei are counterstained with DRAQ5 (red, fluorescent DNA dye). Compounds localization (in green) and IC<sub>50</sub> (in red) have been indicated to facilitate the comparison between the compounds.

## BODIPY 1

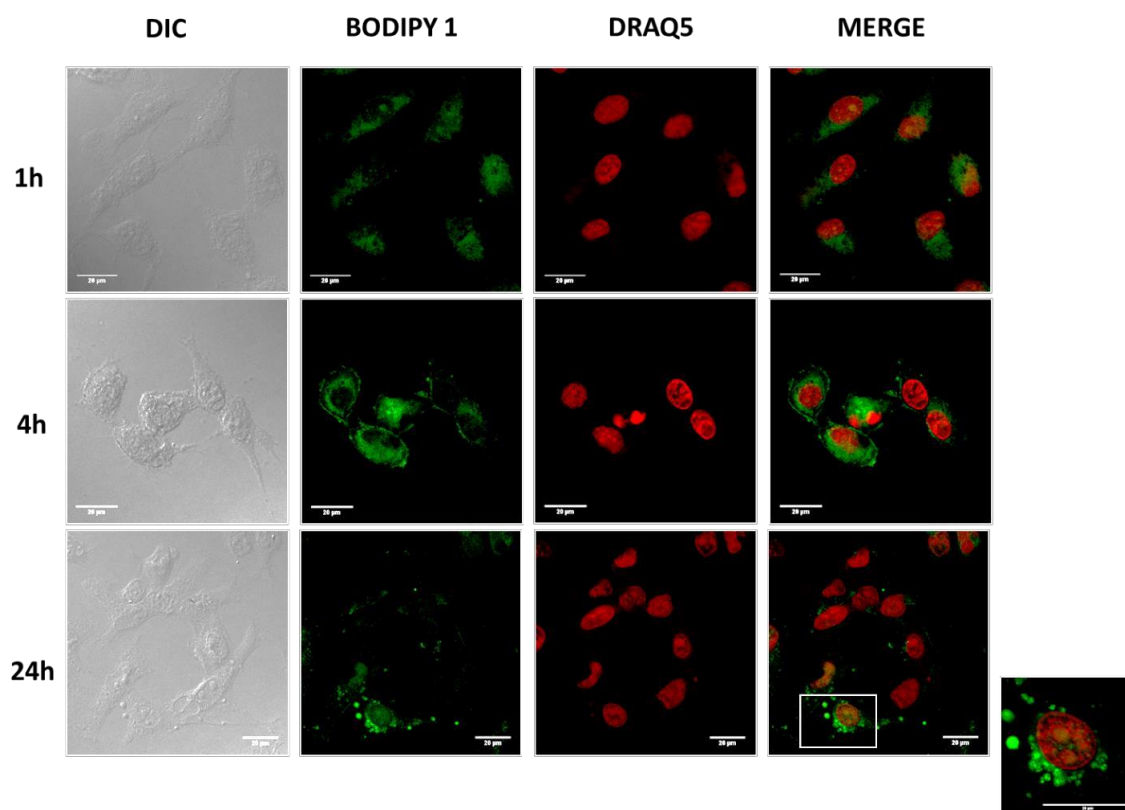

Figure S 105: Confocal immunofluorescent analysis of MDA-MB-231 labelled with BODIPY 1 (DIC: bright field, BODIPY-FI: BODIPY fluorescence canal, DRAQ5: DRAQ5 canal). Cells are incubated with 10 µM BODIPY derivatives (green) for 4h at 37°C then fixed, permeabilized with iced methanol. The nuclei are counterstained with DRAQ5 (red, fluorescent DNA dye). Compounds localization (in green) and IC<sub>50</sub> (in red) have been indicated to facilitate the comparison between the compounds.

## BODIPY 3

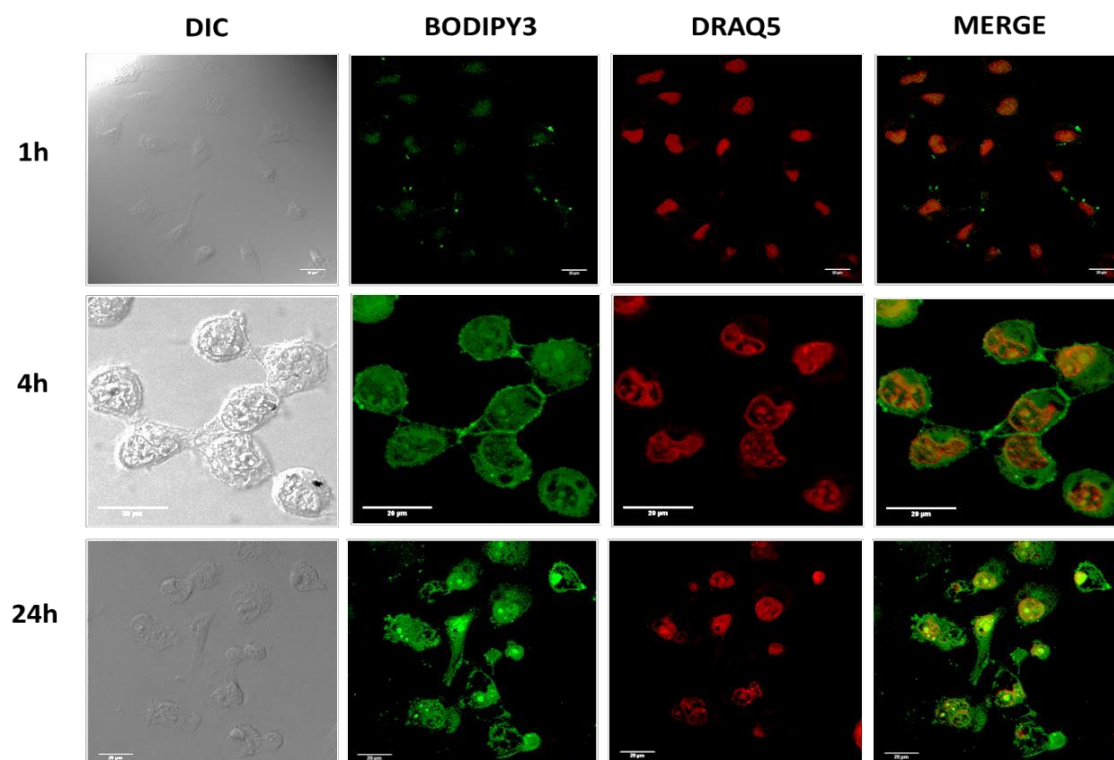

Figure S 106: Confocal immunofluorescent analysis of MDA-MB-231 labelled with BODIPY 3 (DIC: bright field, BODIPY-FI: BODIPY fluorescence canal, DRAQ5: DRAQ5 canal). Cells are incubated with 10 µM BODIPY derivatives (green) for 4h at 37°C then fixed, permeabilized with iced methanol. The nuclei are counterstained with DRAQ5 (red, fluorescent DNA dye). Compounds localization (in green) and IC<sub>50</sub> (in red) have been indicated to facilitate the comparison between the compounds.

## BODIPY 4

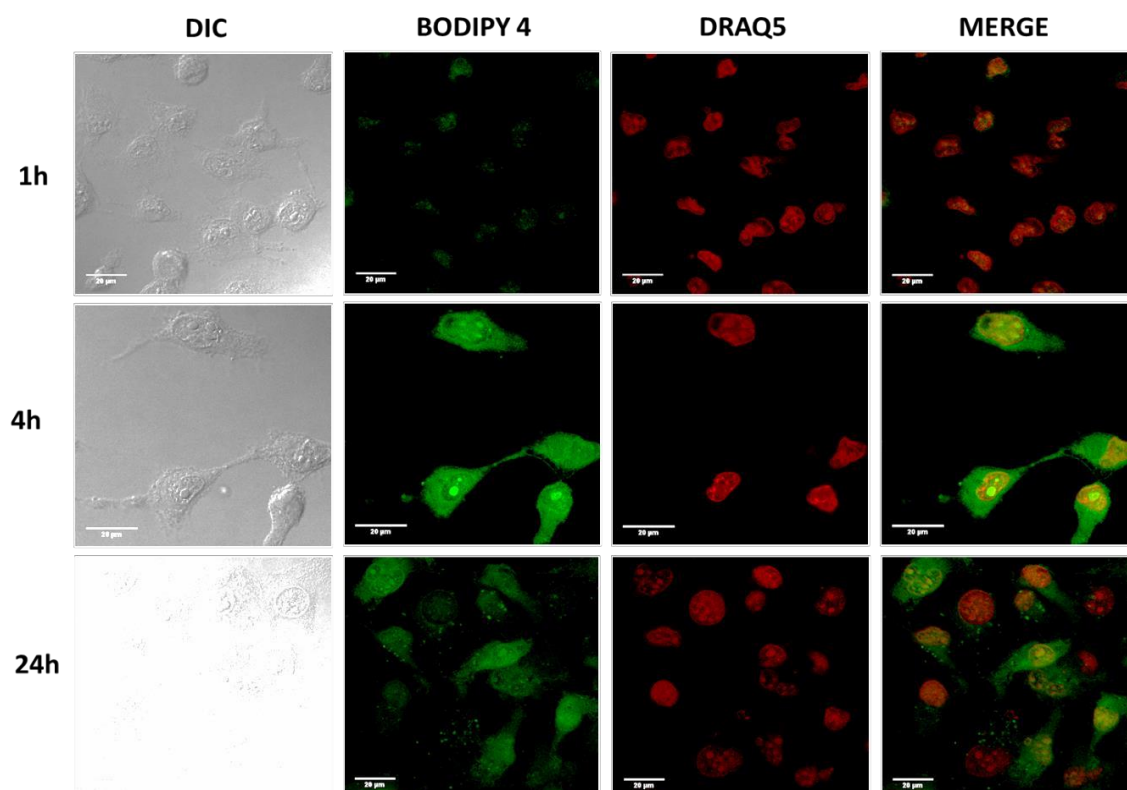

Figure S 107: Confocal immunofluorescent analysis of MDA-MB-231 labelled with BODIPY 4 (DIC: bright field, BODIPY-FI: BODIPY fluorescence canal, DRAQ5: DRAQ5 canal). Cells are incubated with 10 µM BODIPY derivatives (green) for 4h at 37°C then fixed, permeabilized with iced methanol. The nuclei are counterstained with DRAQ5 (red, fluorescent DNA dye). Compounds localization (in green) and IC<sub>50</sub> (in red) have been indicated to facilitate the comparison between the compounds.

## BODIPY 5

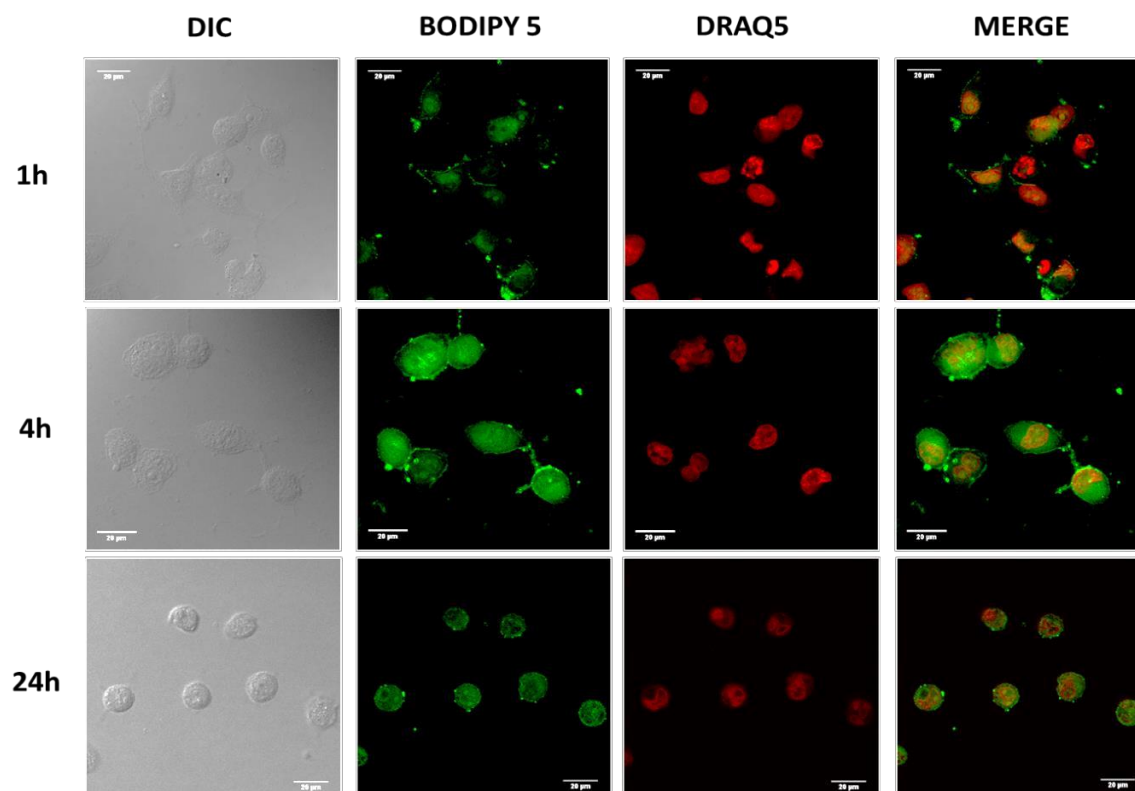

Figure S 108: Confocal immunofluorescent analysis of MDA-MB-231 labelled with BODIPY 5 (DIC: bright field, BODIPY-FI: BODIPY fluorescence canal, DRAQ5: DRAQ5 canal). Cells are incubated with 10 µM BODIPY derivatives (green) for 4h at 37°C then fixed, permeabilized with iced methanol. The nuclei are counterstained with DRAQ5 (red, fluorescent DNA dye). Compounds localization (in green) and IC<sub>50</sub> (in red) have been indicated to facilitate the comparison between the compounds.

## BODIPY 6

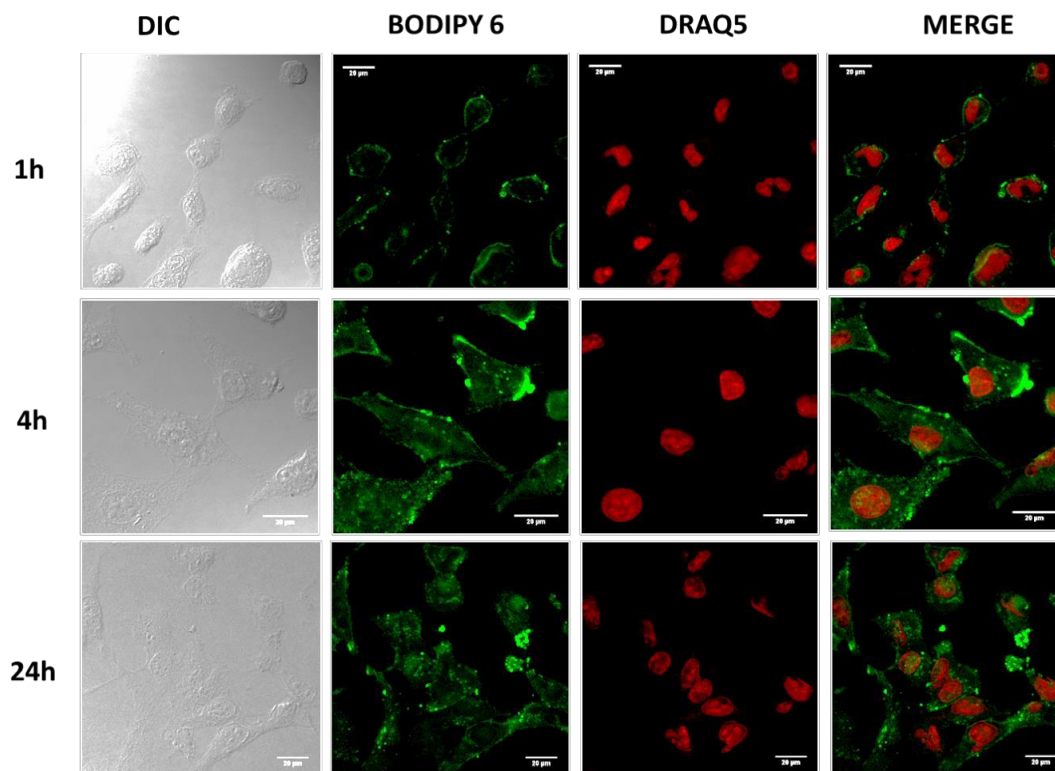

Figure S 109: Confocal immunofluorescent analysis of MDA-MB-231 labelled with BODIPY 6 (DIC: bright field, BODIPY-FI: BODIPY fluorescence canal, DRAQ5: DRAQ5 canal). Cells are incubated with 10  $\mu$ M BODIPY derivatives (green) for 4h at 37°C then fixed, permeabilized with iced methanol. The nuclei are counterstained with DRAQ5 (red, fluorescent DNA dye). Compounds localization (in green) and IC<sub>50</sub> (in red) have been indicated to facilitate the comparison between the compounds.

## BODIPY 7

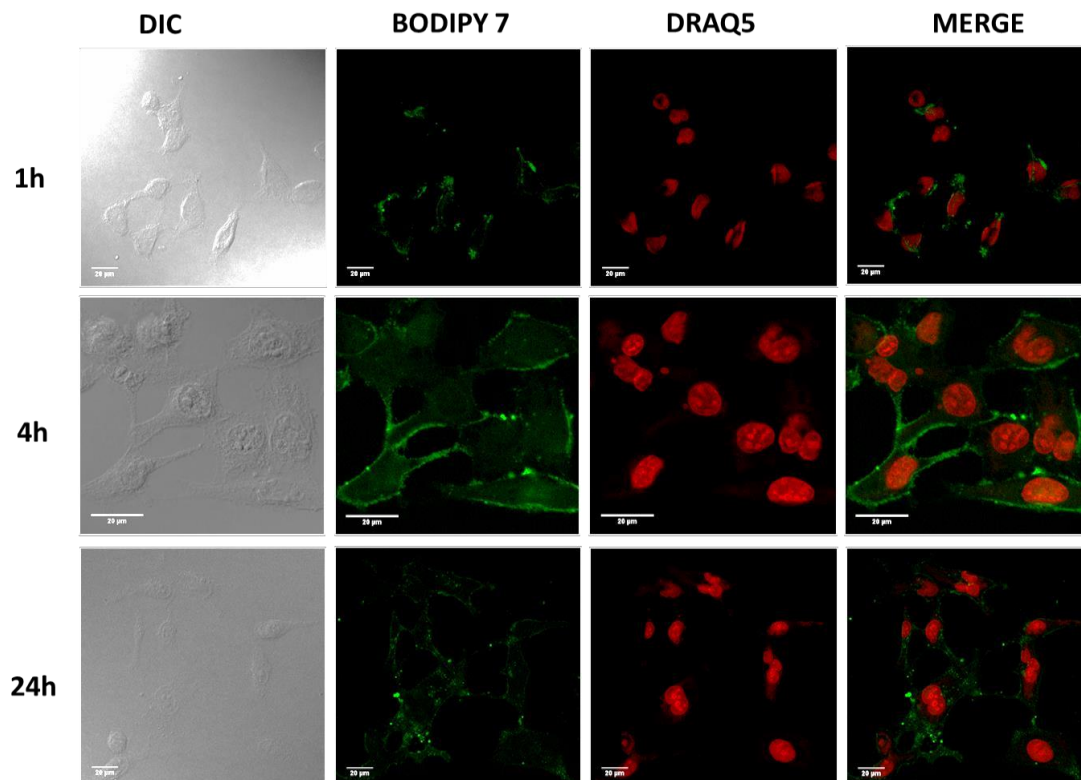

Figure S 110: Confocal immunofluorescent analysis of MDA-MB-231 labelled with BODIPY 7 (DIC: bright field, BODIPY-FI: BODIPY fluorescence canal, DRAQ5: DRAQ5 canal). Cells are incubated with 10  $\mu$ M BODIPY derivatives (green) for 4h at 37°C then fixed, permeabilized with iced methanol. The nuclei are counterstained with DRAQ5 (red, fluorescent DNA dye). Compounds localization (in green) and IC<sub>50</sub> (in red) have been indicated to facilitate the comparison between the compounds.



## BODIPY 8

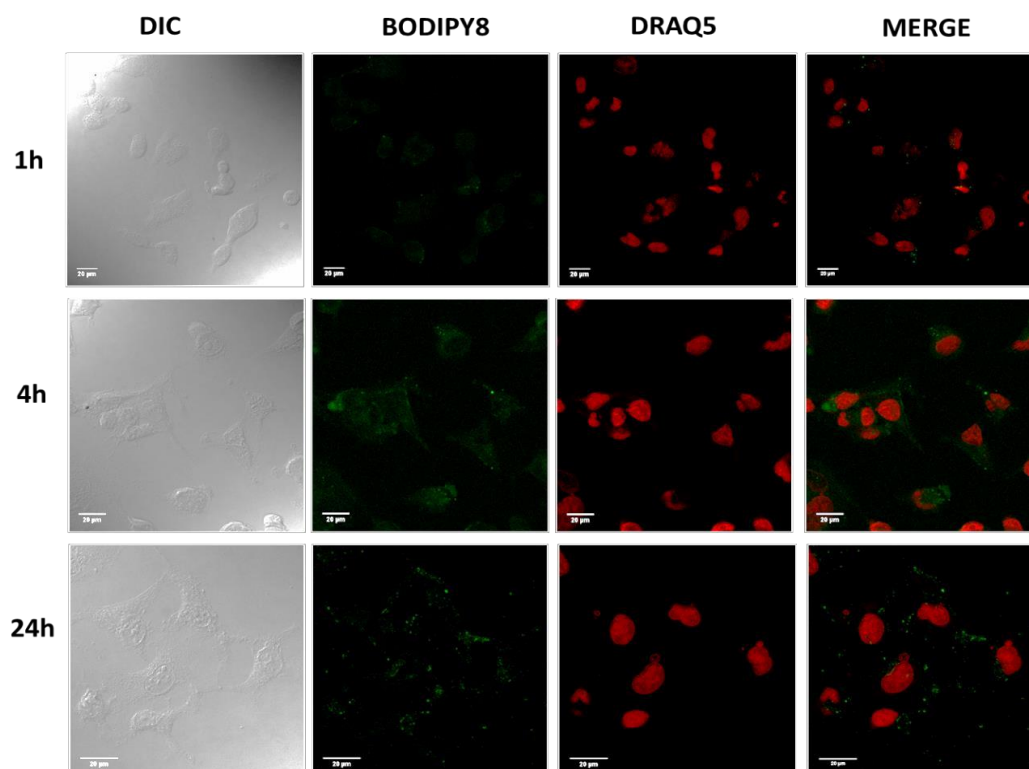

Figure S 111: Confocal immunofluorescent analysis of MDA-MB-231 labelled with BODIPY 8 (DIC: bright field, BODIPY-FI: BODIPY fluorescence canal, DRAQ5: DRAQ5 canal). Cells are incubated with 10 µM BODIPY derivatives (green) for 4h at 37°C then fixed, permeabilized with iced methanol. The nuclei are counterstained with DRAQ5 (red, fluorescent DNA dye). Compounds localization (in green) and IC<sub>50</sub> (in red) have been indicated to facilitate the comparison between the compounds.

## BODI-Au-7

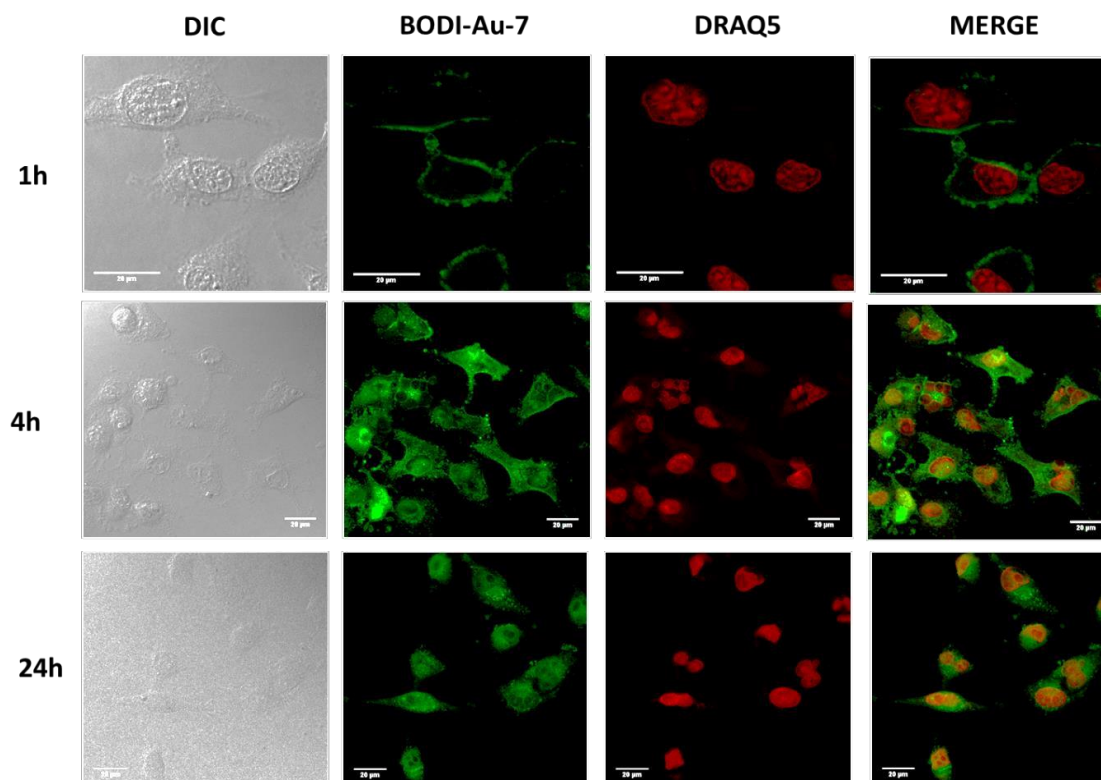

Figure S 112: Confocal immunofluorescent analysis of MDA-MB-231 labelled with BODI-Au-7 (DIC: bright field, BODIPY-FI: BODIPY fluorescence canal, DRAQ5: DRAQ5 canal). Cells are incubated with 10 µM BODIPY derivatives (green) for 4h at 37°C then fixed, permeabilized with iced methanol. The nuclei are counterstained with DRAQ5 (red, fluorescent DNA dye). Compounds localization (in green) and IC<sub>50</sub> (in red) have been indicated to facilitate the comparison between the compounds.

## BODI-Au-8

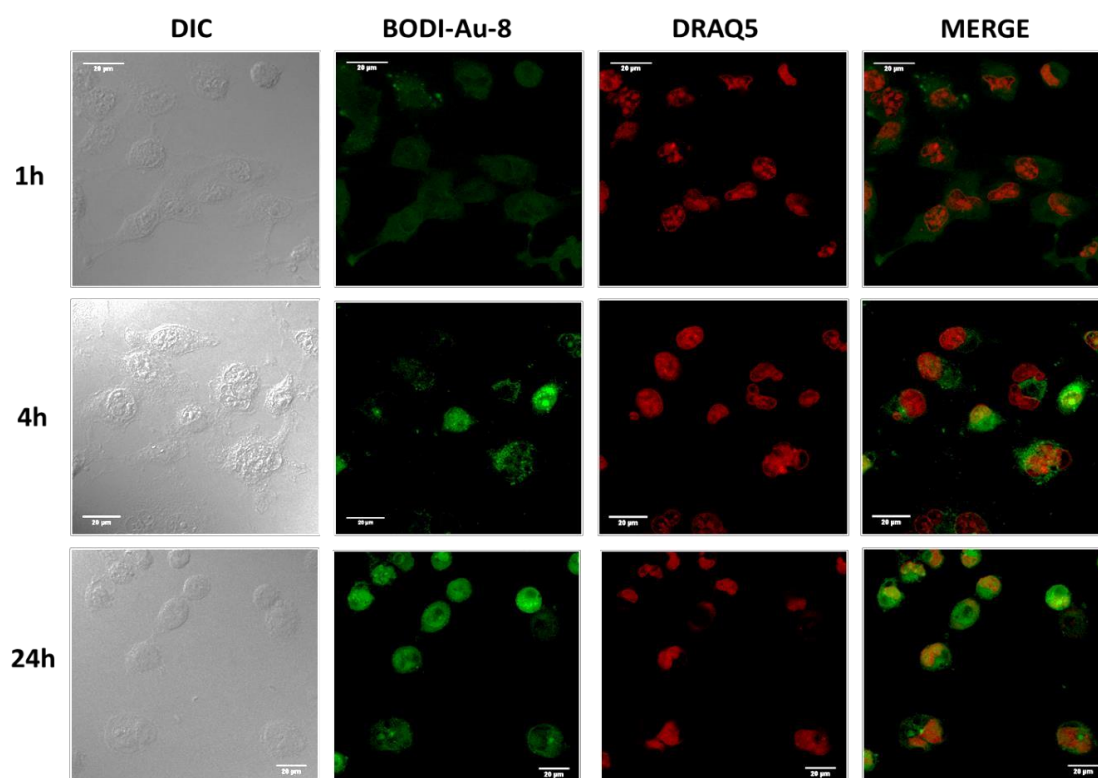

Figure S 113: Confocal immunofluorescent analysis of MDA-MB-231 labelled with **BODI-Au-8** (DIC: bright field, BODIPY-FI: BODIPY fluorescence canal, DRAQ5: DRAQ5 canal). Cells are incubated with 10  $\mu$ M BODIPY derivatives (green) for 4h at 37°C then fixed, permeabilized with iced methanol. The nuclei are counterstained with DRAQ5 (red, fluorescent DNA dye). Compounds localization (in green) and IC<sub>50</sub> (in red) have been indicated to facilitate the comparison between the compounds.

## BODI-Au-9

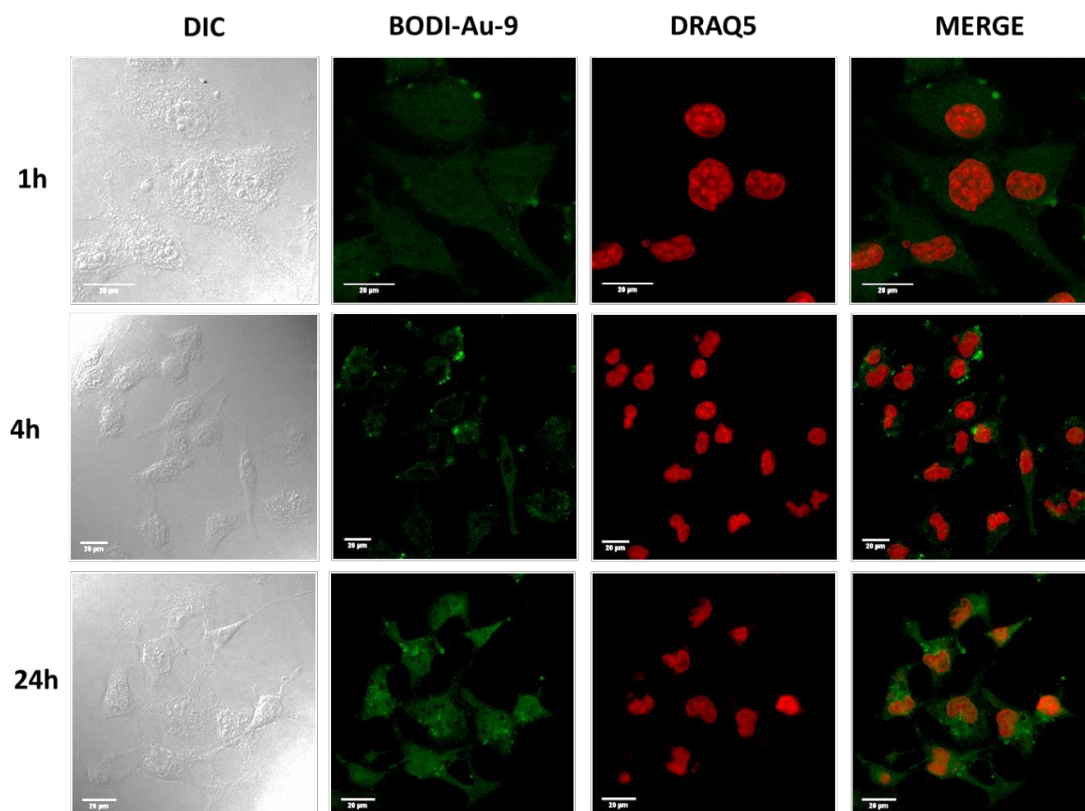

Figure S 114: Confocal immunofluorescent analysis of MDA-MB-231 labelled with **BODI-Au-9** (DIC: bright field, BODIPY-FI: BODIPY fluorescence canal, DRAQ5: DRAQ5 canal). Cells are incubated with 10  $\mu$ M BODIPY derivatives (green) for 4h at 37°C then fixed, permeabilized with iced methanol. The nuclei are counterstained with DRAQ5 (red, fluorescent DNA dye). Compounds localization (in green) and IC<sub>50</sub> (in red) have been indicated to facilitate the comparison between the compounds.

## BODI-Au-10

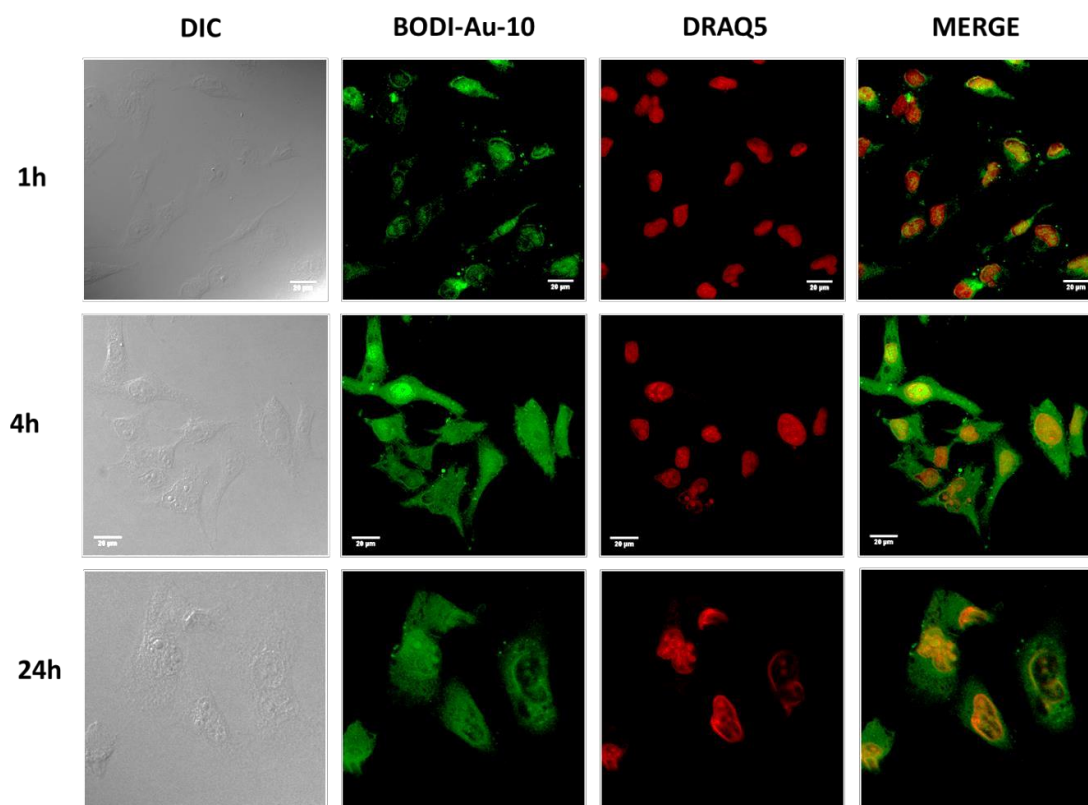

Figure S 115: Confocal immunofluorescent analysis of MDA-MB-231 labelled with **BODI-Au-10** (DIC: bright field, BODIPY-FI: BODIPY fluorescence canal, DRAQ5: DRAQ5 canal). Cells are incubated with 10  $\mu\text{M}$  BODIPY derivatives (green) for 4h at 37°C then fixed, permeabilized with iced methanol. The nuclei are counterstained with DRAQ5 (red, fluorescent DNA dye). Compounds localization (in green) and  $\text{IC}_{50}$  (in red) have been indicated to facilitate the comparison between the compounds.

## BODI-Au-11

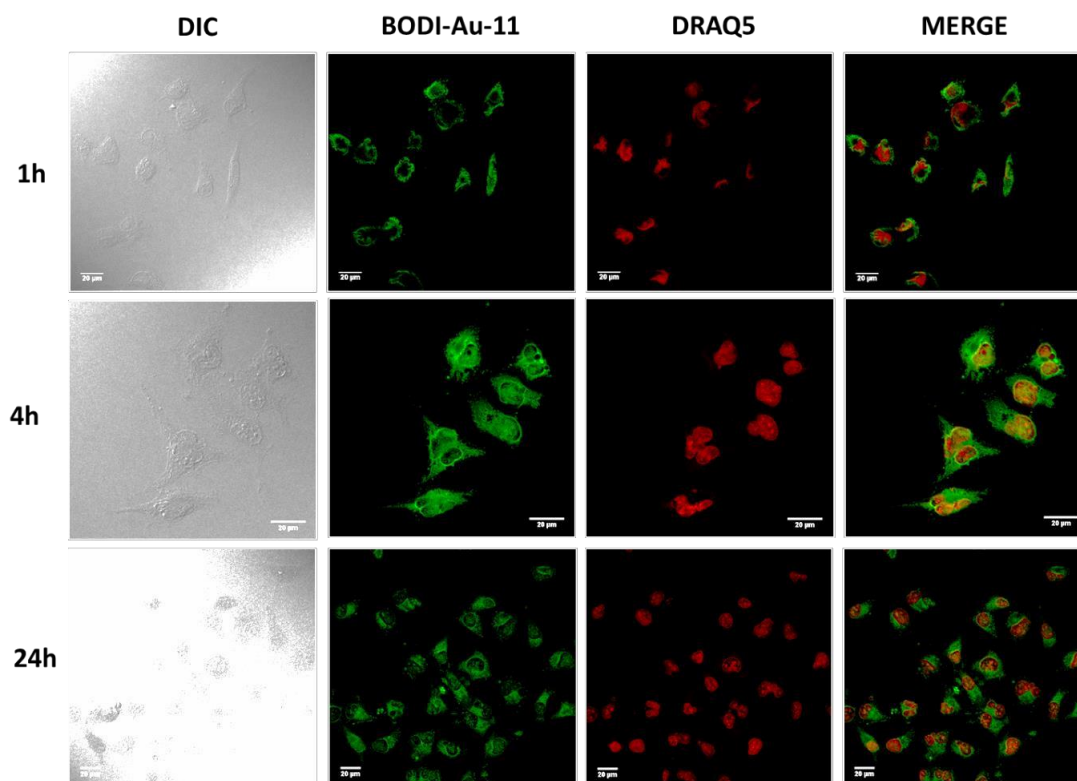

Figure S 116: Confocal immunofluorescent analysis of MDA-MB-231 labelled with **BODI-Au-11** (DIC: bright field, BODIPY-FI: BODIPY fluorescence canal, DRAQ5: DRAQ5 canal). Cells are incubated with 10  $\mu\text{M}$  BODIPY derivatives (green) for 4h at 37°C then fixed, permeabilized with iced methanol. The nuclei are counterstained with DRAQ5 (red, fluorescent DNA dye). Compounds localization (in green) and  $\text{IC}_{50}$  (in red) have been indicated to facilitate the comparison between the compounds.

## BODI-Au-12

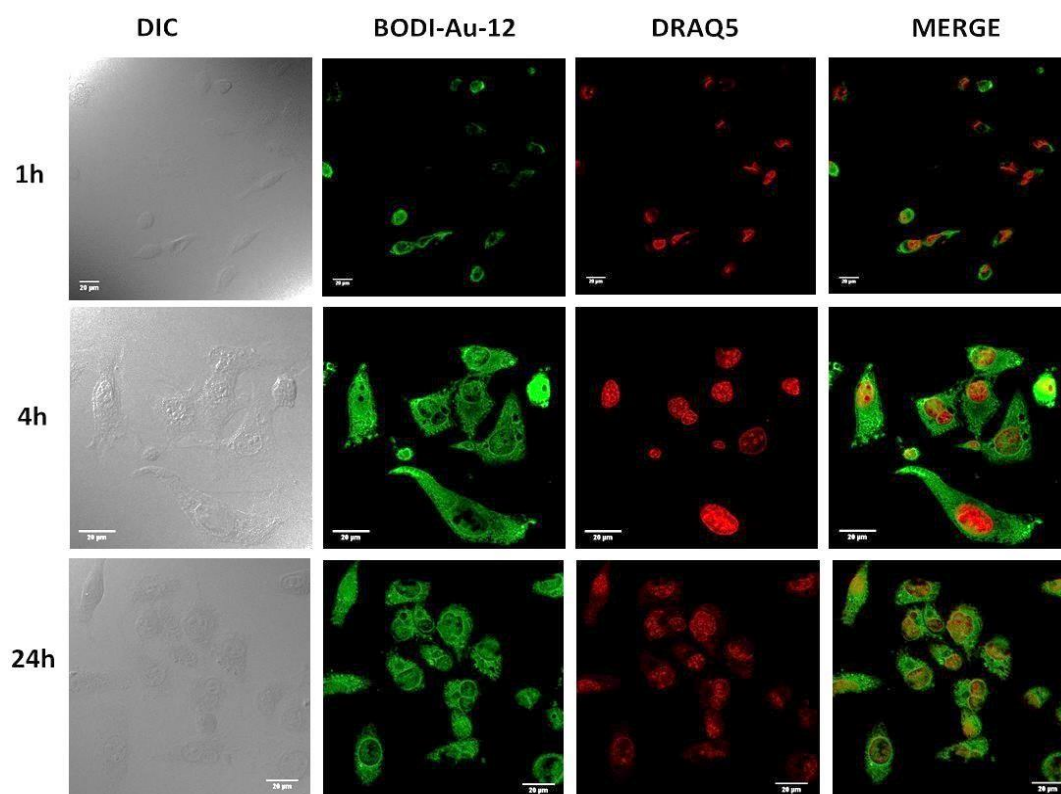

Figure S 117: Confocal immunofluorescent analysis of MDA-MB-231 labelled with **BODI-Au-12** (DIC: bright field, BODIPY-FI: BODIPY fluorescence canal, DRAQ5: DRAQ5 canal). Cells are incubated with 10  $\mu\text{M}$  BODIPY derivatives (green) for 4h at 37°C then fixed, permeabilized with iced methanol. The nuclei are counterstained with DRAQ5 (red, fluorescent DNA dye). Compounds localization (in green) and  $\text{IC}_{50}$  (in red) have been indicated to facilitate the comparison between the compounds.

## BODI-Au-13

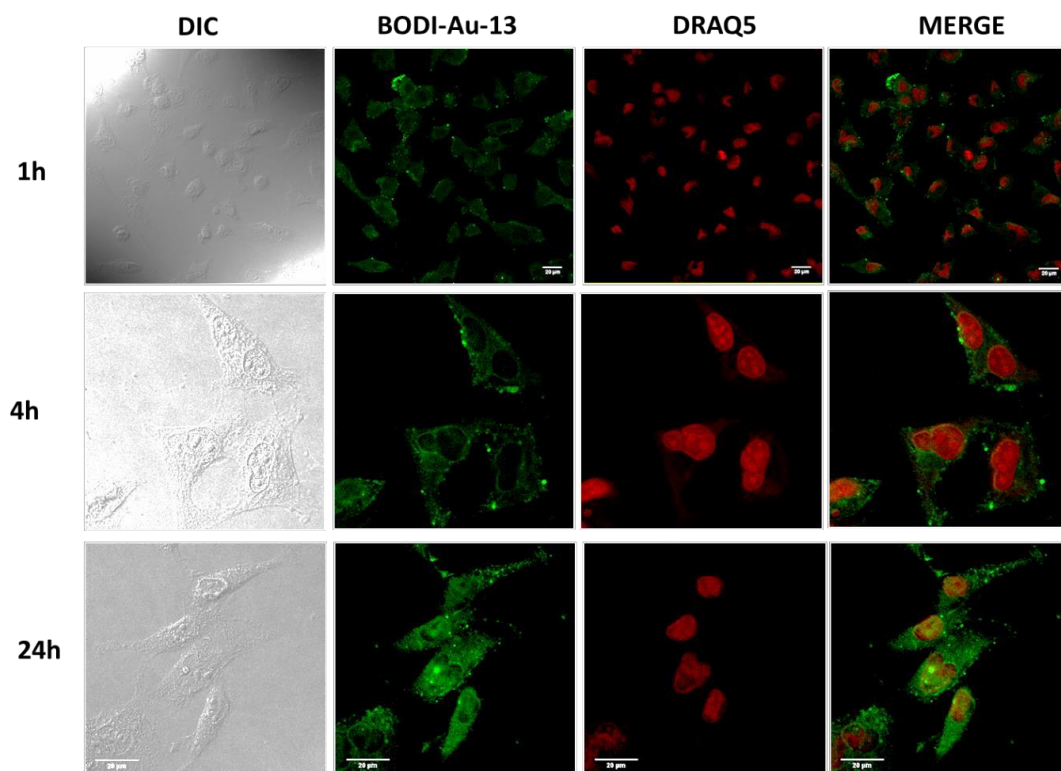

Figure S 118: Confocal immunofluorescent analysis of MDA-MB-231 labelled with **BODI-Au-13** (DIC: bright field, BODIPY-FI: BODIPY fluorescence canal, DRAQ5: DRAQ5 canal). Cells are incubated with 10  $\mu\text{M}$  BODIPY derivatives (green) for 4h at 37°C then fixed, permeabilized with iced methanol. The nuclei are counterstained with DRAQ5 (red, fluorescent DNA dye). Compounds localization (in green) and  $\text{IC}_{50}$  (in red) have been indicated to facilitate the comparison between the compounds.

## BODI-Au-14

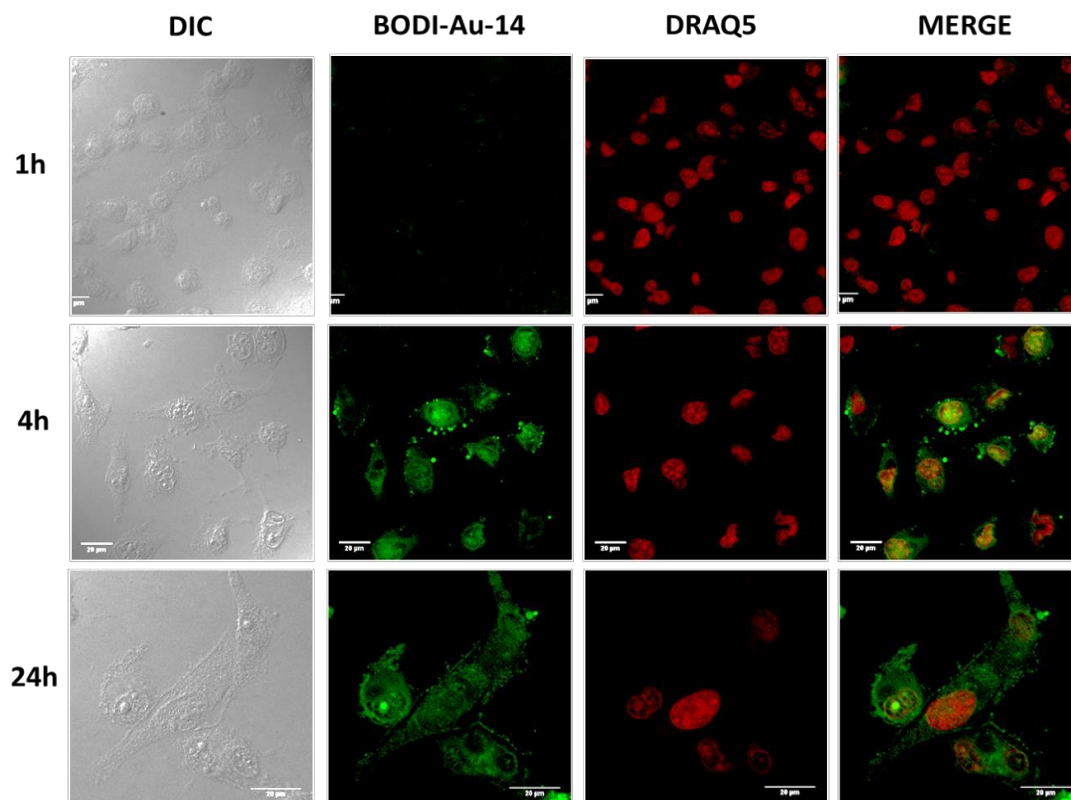

Figure S 119: Confocal immunofluorescent analysis of MDA-MB-231 labelled with **BODI-Au-14** (DIC: bright field, BODIPY-FI: BODIPY fluorescence canal, DRAQ5: DRAQ5 canal). Cells are incubated with 10  $\mu$ M BODIPY derivatives (green) for 4h at 37°C then fixed, permeabilized with iced methanol. The nuclei are counterstained with DRAQ5 (red, fluorescent DNA dye). Compounds localization (in green) and IC<sub>50</sub> (in red) have been indicated to facilitate the comparison between the compounds.

## BODI-Au-15

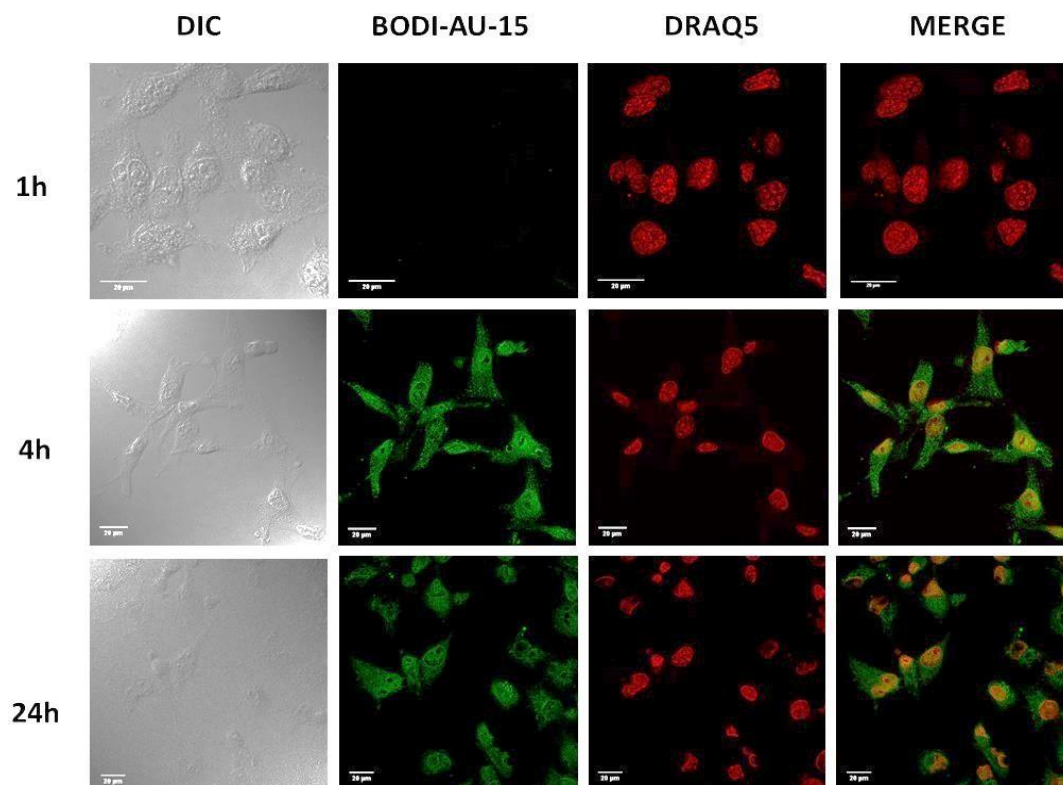

Figure S 120: Confocal immunofluorescent analysis of MDA-MB-231 labelled with **BODI-Au-15** (DIC: bright field, BODIPY-FI: BODIPY fluorescence canal, DRAQ5: DRAQ5 canal). Cells are incubated with 10  $\mu$ M BODIPY derivatives (green) for 4h at 37°C then fixed, permeabilized with iced methanol. The nuclei are counterstained with DRAQ5 (red, fluorescent DNA dye). Compounds localization (in green) and IC<sub>50</sub> (in red) have been indicated to facilitate the comparison between the compounds.

## BODI-Au-16

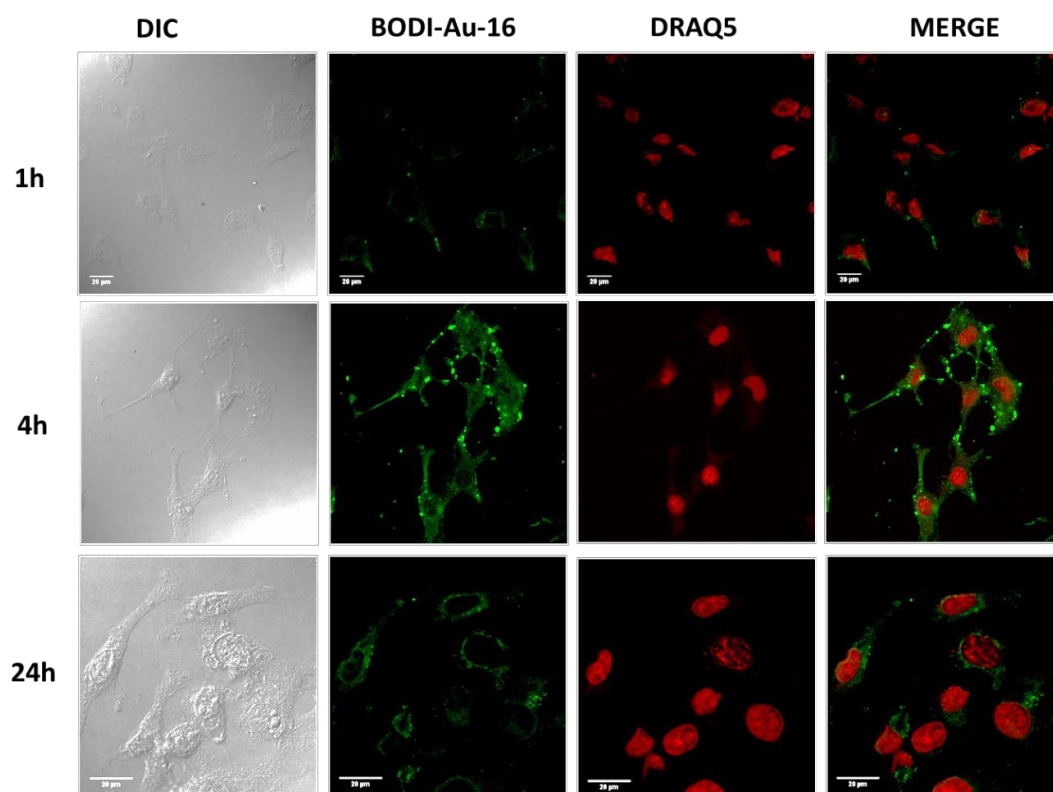

Figure S 121: Confocal immunofluorescent analysis of MDA-MB-231 labelled with **BODI-Au-16** (DIC: bright field, BODIPY-FI: BODIPY fluorescence canal, DRAQ5: DRAQ5 canal). Cells are incubated with 10 µM BODIPY derivatives (green) for 4h at 37°C then fixed, permeabilized with iced methanol. The nuclei are counterstained with DRAQ5 (red, fluorescent DNA dye). Compounds localization (in green) and IC<sub>50</sub> (in red) have been indicated to facilitate the comparison between the compounds.

## BODI-Au-17

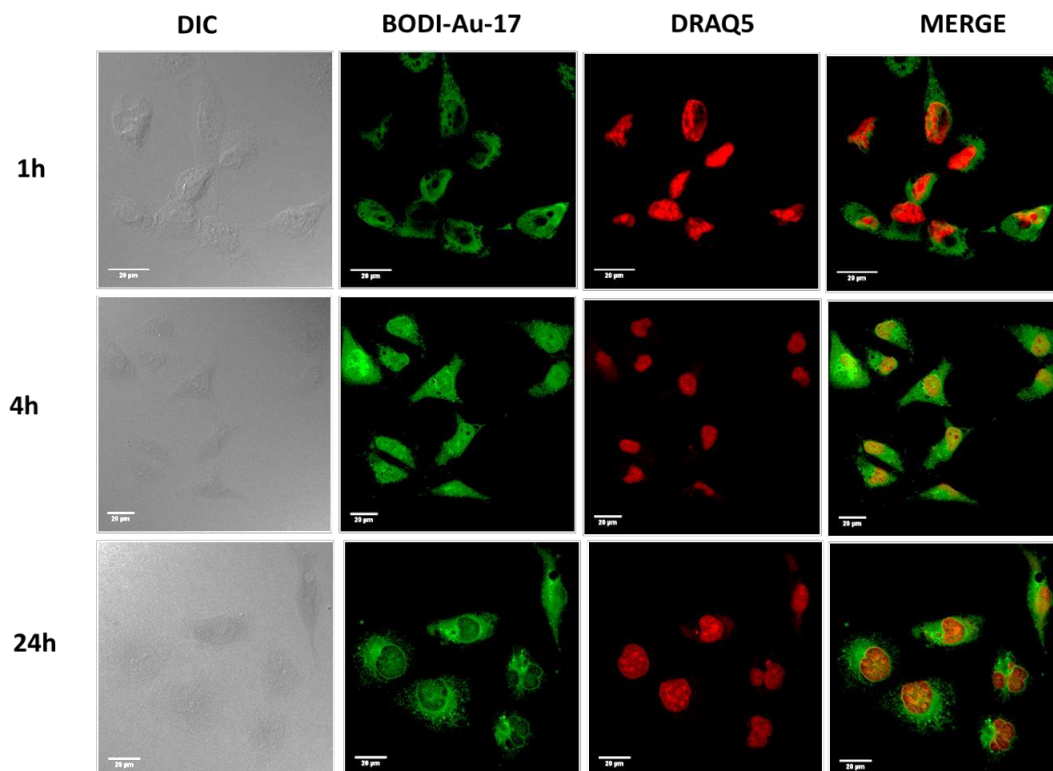

Figure S 122: Confocal immunofluorescent analysis of MDA-MB-231 labelled with **BODI-Au-17** (DIC: bright field, BODIPY-FI: BODIPY fluorescence canal, DRAQ5: DRAQ5 canal). Cells are incubated with 10 µM BODIPY derivatives (green) for 4h at 37°C then fixed, permeabilized with iced methanol. The nuclei are counterstained with DRAQ5 (red, fluorescent DNA dye). Compounds localization (in green) and IC<sub>50</sub> (in red) have been indicated to facilitate the comparison between the compounds.

Submitted by: **Jacques Pliquett**Solved by: **Yoann Rousselin**Sample ID: **15JPL191****Crystal Data and Experimental**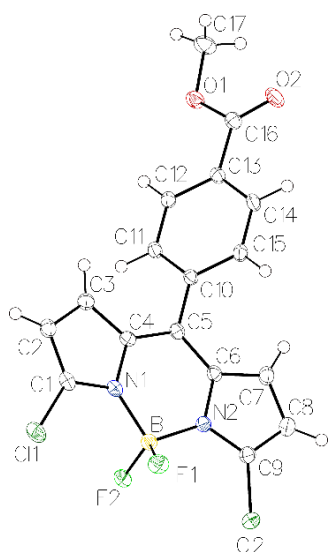

**Experimental.** Single clear light orange plate-shaped crystals of (**Compound 2**) were recrystallised from DCM by slow evaporation. A suitable crystal (0.46x0.40x0.21) mm<sup>3</sup> was selected and mounted on a MITIGEN holder oil on a Bruker D8 VENTURE diffractometer. The crystal was kept at  $T = 100(1)$  K during data collection. Using **Olex2** (Dolomanov et al., 2009), the structure was solved with the **ShelXT** (Sheldrick, 2015) structure solution program, using the Intrinsic Phasing solution method. The model was refined with version 2018/1 of **ShelXL** (Sheldrick, 2015) using Least Squares minimisation.

**Crystal Data.** C<sub>17</sub>H<sub>11</sub>BCl<sub>2</sub>F<sub>2</sub>N<sub>2</sub>O<sub>2</sub>,  $M_r = 394.99$ , triclinic, P-1 (No. 2),  $a = 7.8312(3)$  Å,  $b = 10.3013(5)$  Å,  $c = 10.4618(4)$  Å,  $\alpha = 96.577(2)^\circ$ ,  $\beta = 101.739(2)^\circ$ ,  $\gamma = 97.026(2)^\circ$ ,  $V = 811.63(6)$  Å<sup>3</sup>,  $T = 100(1)$  K,  $Z = 2$ ,  $Z' = 1$ ,  $\mu(\text{MoK}\alpha) = 0.437$ , 28837 reflections measured, 3731 unique ( $R_{int} = 0.0303$ ) which were used in all calculations. The final  $wR_2$  was 0.0902 (all data) and  $R_1$  was 0.0361 ( $I > 2(I)$ ).

Table S3: X-ray structure data of BODIPY2.

| Compound                     | Compound 2                                                                                    |
|------------------------------|-----------------------------------------------------------------------------------------------|
| <b>CCDC</b>                  | <b>1825949</b>                                                                                |
| Formula                      | C <sub>17</sub> H <sub>11</sub> BCl <sub>2</sub> F <sub>2</sub> N <sub>2</sub> O <sub>2</sub> |
| $D_{calc.}/\text{g cm}^{-3}$ | 1.616                                                                                         |
| $\mu/\text{mm}^{-1}$         | 0.437                                                                                         |
| Formula Weight               | 394.99                                                                                        |
| Colour                       | clear light orange                                                                            |
| Shape                        | plate                                                                                         |
| Size/mm <sup>3</sup>         | 0.46x0.40x0.21                                                                                |
| $T/\text{K}$                 | 100(1)                                                                                        |
| Crystal System               | triclinic                                                                                     |
| Space Group                  | P-1                                                                                           |
| $a/\text{Å}$                 | 7.8312(3)                                                                                     |
| $b/\text{Å}$                 | 10.3013(5)                                                                                    |
| $c/\text{Å}$                 | 10.4618(4)                                                                                    |
| $\alpha^\circ$               | 96.577(2)                                                                                     |
| $\beta^\circ$                | 101.739(2)                                                                                    |
| $\gamma^\circ$               | 97.026(2)                                                                                     |
| $V/\text{Å}^3$               | 811.63(6)                                                                                     |
| $Z$                          | 2                                                                                             |
| $Z'$                         | 1                                                                                             |
| Wavelength/Å                 | 0.71073                                                                                       |
| Radiation type               | MoK $\alpha$                                                                                  |
| $\theta_{min}/^\circ$        | 2.979                                                                                         |
| $\theta_{max}/^\circ$        | 27.560                                                                                        |
| Measured Refl.               | 28837                                                                                         |
| Independent Refl.            | 3731                                                                                          |
| Reflections Used             | 3256                                                                                          |
| $R_{int}$                    | 0.0303                                                                                        |
| Parameters                   | 236                                                                                           |
| Restraints                   | 0                                                                                             |
| Largest Peak                 | 0.485                                                                                         |
| Deepest Hole                 | -0.284                                                                                        |
| GooF                         | 1.046                                                                                         |
| $wR_2$ (all data)            | 0.0902                                                                                        |
| $wR_2$                       | 0.0831                                                                                        |
| $R_1$ (all data)             | 0.0439                                                                                        |
| $R_1$                        | 0.0361                                                                                        |

Table S 4: BODIPY 2 structure Quality Indicators.

|                     |            |       |             |      |                  |       |          |       |
|---------------------|------------|-------|-------------|------|------------------|-------|----------|-------|
| <b>Reflections:</b> | d min (Mo) | 0.77  | I/ $\sigma$ | 37.5 | R <sub>int</sub> | 3.03% | complete | 100%  |
| <b>Refinement:</b>  | Shift      | 0.000 | Max Peak    | 0.5  | Min Peak         | -0.3  | Goof     | 1.046 |

A clear light orange plate-shaped crystal with dimensions 0.46x0.40x0.21 mm<sup>3</sup> was mounted on a MITIGEN holder oil. X-ray diffraction data were collected using a Bruker D8 VENTURE diffractometer equipped with a Oxford Cryosystems low-temperature device, operating at  $T = 100(1)$  K. Data were measured using  $\phi$  and  $\omega$  scans of  $2^\circ$  per frame for 10s using MoK $\alpha$  radiation (X-ray tube, 50 kV, 32 mA). The total number of runs and images was based on the strategy calculation from the program APEX3 (Bruker, 2015). The maximum resolution achieved was  $\theta = 27.560^\circ$ . Cell parameters were retrieved using the **SAINT** (Bruker, V8.34A, after 2013) software and refined using **SAINT** (Bruker, V8.34A, after 2013) on 9970 reflections, 35 % of the observed reflections. Data reduction was performed using the **SAINT** (Bruker, V8.34A, after 2013) software which corrects for Lorentz polarisation. The final completeness is 99.90 % out to  $27.560^\circ$  in  $\theta$ . A multi-scan absorption correction was performed using SADABS-2014/5 (Bruker, 2014) was used for absorption correction.  $wR_2(\text{int})$  was 0.0603 before and 0.0502 after correction. The Ratio of minimum to maximum transmission is 0.9179. The  $\lambda/2$  correction factor is 0.00150. The absorption coefficient  $\mu$  of this material is 0.437 mm<sup>-1</sup> at this wavelength ( $\lambda = 0.71073\text{\AA}$ ) and the minimum and maximum transmissions are 0.6844 and 0.7456. The structure was solved in the space group P-1 (# 2) by Intrinsic Phasing using the **ShelXT** (Sheldrick, 2015) structure solution program and refined by Least Squares using version 2018/1 of **ShelXL** (Sheldrick, 2015). All non-hydrogen atoms were refined anisotropically. Hydrogen atom positions were calculated geometrically and refined using the riding model. SADABS-2014/5 (Bruker, 2014) was used for absorption correction.  $wR_2(\text{int})$  was 0.0603 before and 0.0502 after correction. The Ratio of minimum to maximum transmission is 0.9179. The  $\lambda/2$  correction factor is 0.00150. There is a single molecule in the asymmetric unit, which is represented by the reported sum formula. In other words: Z is 2 and Z' is 1.

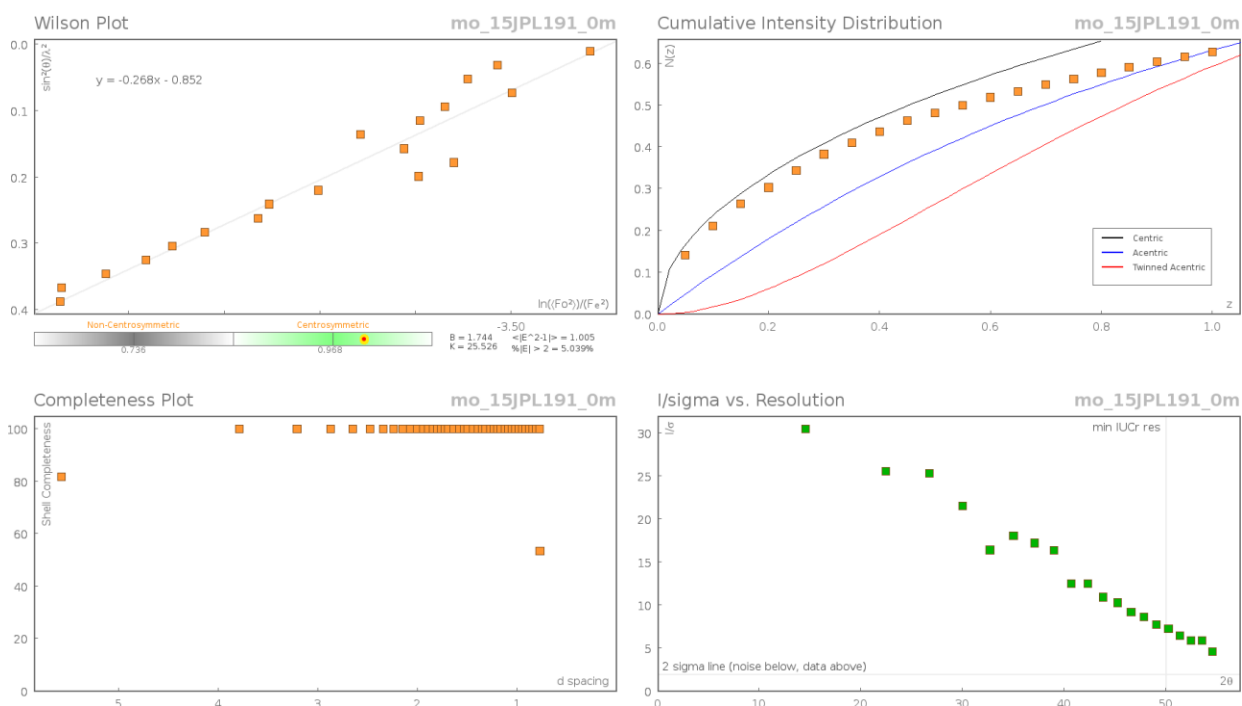

Figure S 123: Data Plots: Diffraction Data of BODIPY2 structure.



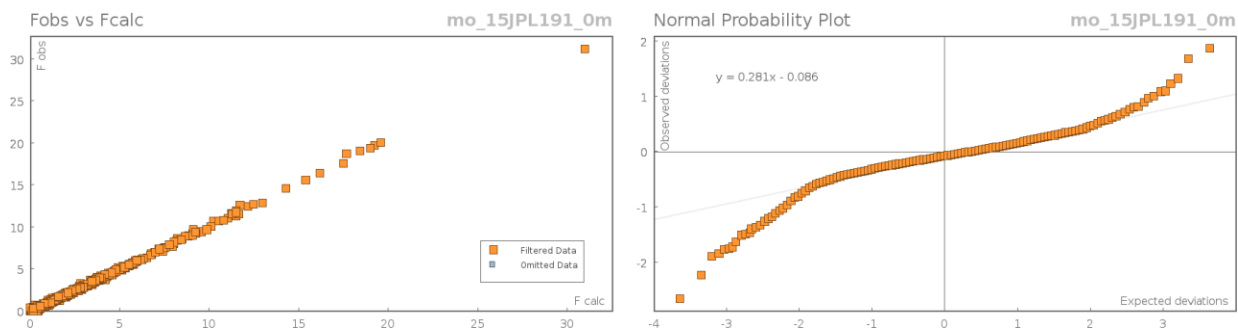

Figure S 124: Data Plots: refinement and Data of BODIPY 2 structure.

Table S5: reflection statistics of BODIPY2 structure.

|                                     |                                   |                            |                 |
|-------------------------------------|-----------------------------------|----------------------------|-----------------|
| Total reflections (after filtering) | 28837                             | Unique reflections         | 3731            |
| Completeness                        | 0.998                             | Mean $I/\sigma$            | 37.48           |
| $hkl_{\max}$ collected              | (10, 13, 13)                      | $hkl_{\min}$ collected     | (-10, -13, -13) |
| $hkl_{\max}$ used                   | (9, 13, 13)                       | $hkl_{\min}$ used          | (-10, -13, 0)   |
| Lim $d_{\max}$ collected            | 100.0                             | Lim $d_{\min}$ collected   | 0.36            |
| $d_{\max}$ used                     | 6.84                              | $d_{\min}$ used            | 0.77            |
| Friedel pairs                       | 3682                              | Friedel pairs merged       | 1               |
| Inconsistent equivalents            | 0                                 | $R_{\text{int}}$           | 0.0303          |
| $R_{\text{sigma}}$                  | 0.0165                            | Intensity transformed      | 0               |
| Omitted reflections                 | 0                                 | Omitted by user (OMIT hkl) | 0               |
| Multiplicity                        | (348, 290, 1401, 3353, 1832, 189) | Maximum multiplicity       | 12              |
| Removed systematic absences         | 0                                 | Filtered off (Shel/OMIT)   | 0               |

Table S 6: Fractional Atomic Coordinates ( $\times 10^4$ ) and Equivalent Isotropic Displacement Parameters ( $\text{\AA}^2 \times 10^3$ ) for BODIPY 2.  $U_{\text{eq}}$  is defined as  $1/3$  of the trace of the orthogonalised  $U_{ij}$ .

| Atom | x           | y          | z          | $U_{\text{eq}}$ |
|------|-------------|------------|------------|-----------------|
| Cl1  | 14603.7(6)  | 2109.6(5)  | 4125.4(4)  | 25.14(12)       |
| Cl2  | 11604.2(6)  | -2049.7(4) | 7066.5(5)  | 26.37(12)       |
| F1   | 12251.3(14) | -158.1(10) | 5016.4(10) | 23.4(2)         |
| F2   | 14239.5(13) | 745.1(10)  | 6920.7(10) | 21.1(2)         |
| O1   | 6802.8(16)  | 7422.6(12) | 9542.5(12) | 21.3(3)         |
| O2   | 4326.4(16)  | 5956.4(13) | 8781.9(14) | 27.1(3)         |
| N1   | 12418.8(18) | 2178.9(14) | 5778.4(13) | 15.9(3)         |
| N2   | 11155.1(18) | 468.1(14)  | 6963.9(14) | 16.1(3)         |
| C1   | 13229(2)    | 2821.1(17) | 4963.9(16) | 18.2(3)         |
| C2   | 12813(2)    | 4105.1(18) | 4938.6(17) | 19.5(3)         |
| C3   | 11685(2)    | 4252.9(17) | 5780.0(16) | 17.7(3)         |
| C4   | 11425(2)    | 3057.4(16) | 6302.6(16) | 15.3(3)         |
| C5   | 10314(2)    | 2663.9(16) | 7125.8(15) | 14.8(3)         |
| C6   | 10190(2)    | 1384.8(16) | 7456.1(16) | 15.5(3)         |
| C7   | 9158(2)     | 761.1(17)  | 8237.6(17) | 19.4(3)         |

| Atom | x        | y          | z          | $U_{eq}$ |
|------|----------|------------|------------|----------|
| C8   | 9473(2)  | -529.1(18) | 8204.3(18) | 22.3(4)  |
| C9   | 10700(2) | -662.5(17) | 7416.0(18) | 19.5(3)  |
| C10  | 9206(2)  | 3598.8(16) | 7608.3(15) | 14.6(3)  |
| C11  | 9957(2)  | 4871.2(16) | 8239.0(16) | 15.7(3)  |
| C12  | 8905(2)  | 5730.4(16) | 8686.1(16) | 15.9(3)  |
| C13  | 7089(2)  | 5335.4(16) | 8507.4(16) | 15.5(3)  |
| C14  | 6341(2)  | 4067.6(16) | 7879.6(16) | 17.0(3)  |
| C15  | 7382(2)  | 3199.4(16) | 7429.8(16) | 16.9(3)  |
| C16  | 5905(2)  | 6239.3(17) | 8948.8(16) | 17.7(3)  |
| C17  | 5743(3)  | 8397.4(19) | 9916(2)    | 27.0(4)  |
| B    | 12581(2) | 752.9(18)  | 6135.9(19) | 16.6(4)  |

Table S 7: Anisotropic Displacement Parameters ( $\times 10^4$ ) BODIPY2. The anisotropic displacement factor exponent takes the form:  $-2\pi^2[h^2a^{*2} \times U_{11} + \dots + 2hka^* \times b^* \times U_{12}]$

| Atom | $U_{11}$ | $U_{22}$ | $U_{33}$ | $U_{23}$ | $U_{13}$  | $U_{12}$ |
|------|----------|----------|----------|----------|-----------|----------|
| Cl1  | 22.6(2)  | 32.4(2)  | 24.3(2)  | 3.29(17) | 12.74(17) | 7.03(17) |
| Cl2  | 22.6(2)  | 16.3(2)  | 42.3(3)  | 6.26(18) | 10.08(19) | 4.10(16) |
| F1   | 25.9(5)  | 21.0(5)  | 21.9(5)  | -2.8(4)  | 5.1(4)    | 4.2(4)   |
| F2   | 14.3(5)  | 23.6(5)  | 25.0(5)  | 5.0(4)   | 2.3(4)    | 3.1(4)   |
| O1   | 17.2(6)  | 20.0(6)  | 25.9(6)  | -3.0(5)  | 6.1(5)    | 3.3(5)   |
| O2   | 14.8(6)  | 28.0(7)  | 38.4(8)  | -1.4(6)  | 9.0(5)    | 3.5(5)   |
| N1   | 13.5(6)  | 19.3(7)  | 15.4(6)  | 1.7(5)   | 4.1(5)    | 2.7(5)   |
| N2   | 12.9(6)  | 15.2(6)  | 19.1(7)  | 2.2(5)   | 1.4(5)    | 1.1(5)   |
| C1   | 14.0(7)  | 24.2(8)  | 16.3(7)  | 2.4(6)   | 4.1(6)    | 1.7(6)   |
| C2   | 16.6(8)  | 23.4(8)  | 19.0(8)  | 6.8(6)   | 3.8(6)    | 1.9(6)   |
| C3   | 16.3(7)  | 18.8(8)  | 18.0(8)  | 4.5(6)   | 2.4(6)    | 3.0(6)   |
| C4   | 13.5(7)  | 16.7(7)  | 15.4(7)  | 1.5(6)   | 2.3(6)    | 3.1(6)   |
| C5   | 12.2(7)  | 16.7(7)  | 13.9(7)  | 0.7(6)   | 0.6(6)    | 0.5(6)   |
| C6   | 12.7(7)  | 16.2(7)  | 16.7(7)  | 0.9(6)   | 2.4(6)    | 0.7(6)   |
| C7   | 18.3(8)  | 20.2(8)  | 20.6(8)  | 5.6(6)   | 6.3(6)    | 0.5(6)   |
| C8   | 20.3(8)  | 19.9(8)  | 26.9(9)  | 5.8(7)   | 6.1(7)    | 0.5(7)   |
| C9   | 15.2(7)  | 16.4(8)  | 25.0(9)  | 3.4(6)   | 0.9(6)    | 0.7(6)   |
| C10  | 13.5(7)  | 17.0(7)  | 14.4(7)  | 4.9(6)   | 3.7(6)    | 2.6(6)   |
| C11  | 12.0(7)  | 17.9(8)  | 17.2(7)  | 4.0(6)   | 2.9(6)    | 1.0(6)   |
| C12  | 14.5(7)  | 16.1(7)  | 16.7(7)  | 2.7(6)   | 3.1(6)    | 0.6(6)   |
| C13  | 13.9(7)  | 18.5(8)  | 15.3(7)  | 3.5(6)   | 4.8(6)    | 3.1(6)   |

| Atom | $U_{11}$ | $U_{22}$ | $U_{33}$ | $U_{23}$ | $U_{13}$ | $U_{12}$ |
|------|----------|----------|----------|----------|----------|----------|
| C14  | 11.3(7)  | 20.6(8)  | 19.1(8)  | 4.0(6)   | 3.4(6)   | 0.7(6)   |
| C15  | 15.1(7)  | 16.4(8)  | 18.5(8)  | 3.4(6)   | 3.4(6)   | -0.6(6)  |
| C16  | 16.8(8)  | 20.9(8)  | 15.9(7)  | 2.9(6)   | 4.6(6)   | 2.9(6)   |
| C17  | 24.4(9)  | 25.6(9)  | 29.9(10) | -6.2(7)  | 7.1(8)   | 7.6(7)   |
| B    | 14.6(8)  | 16.4(8)  | 18.1(9)  | 0.7(7)   | 3.1(7)   | 1.8(7)   |

Table S 8: Bond Lengths in Å for BODIPY 2.

| Atom | Atom | Length/Å   | Atom | Atom | Length/Å |
|------|------|------------|------|------|----------|
| Cl1  | C1   | 1.7019(17) | C3   | C4   | 1.413(2) |
| Cl2  | C9   | 1.7062(18) | C4   | C5   | 1.401(2) |
| F1   | B    | 1.373(2)   | C5   | C6   | 1.397(2) |
| F2   | B    | 1.390(2)   | C5   | C10  | 1.485(2) |
| O1   | C16  | 1.344(2)   | C6   | C7   | 1.413(2) |
| O1   | C17  | 1.448(2)   | C7   | C8   | 1.379(2) |
| O2   | C16  | 1.207(2)   | C8   | C9   | 1.397(2) |
| N1   | C1   | 1.346(2)   | C10  | C11  | 1.398(2) |
| N1   | C4   | 1.399(2)   | C10  | C15  | 1.405(2) |
| N1   | B    | 1.570(2)   | C11  | C12  | 1.386(2) |
| N2   | C6   | 1.396(2)   | C12  | C13  | 1.399(2) |
| N2   | C9   | 1.342(2)   | C13  | C14  | 1.393(2) |
| N2   | B    | 1.567(2)   | C13  | C16  | 1.492(2) |
| C1   | C2   | 1.402(2)   | C14  | C15  | 1.387(2) |
| C2   | C3   | 1.378(2)   |      |      |          |

Table S 9: Bond Angles in ° for BODIPY 2.

| Atom | Atom | Atom | Angle/°    | Atom | Atom | Atom | Angle/°    |
|------|------|------|------------|------|------|------|------------|
| C16  | O1   | C17  | 115.70(14) | C2   | C1   | C11  | 126.57(13) |
| C1   | N1   | C4   | 106.29(14) | C3   | C2   | C1   | 106.09(15) |
| C1   | N1   | B    | 128.09(14) | C2   | C3   | C4   | 107.77(15) |
| C4   | N1   | B    | 125.59(13) | N1   | C4   | C3   | 108.31(14) |
| C6   | N2   | B    | 126.08(14) | N1   | C4   | C5   | 121.02(15) |
| C9   | N2   | C6   | 106.29(14) | C5   | C4   | C3   | 130.52(15) |
| C9   | N2   | B    | 127.49(14) | C4   | C5   | C10  | 119.62(14) |
| N1   | C1   | Cl1  | 121.88(13) | C6   | C5   | C4   | 120.57(15) |
| N1   | C1   | C2   | 111.54(15) | C6   | C5   | C10  | 119.77(14) |

| Atom | Atom | Atom | Angle/°    |
|------|------|------|------------|
| N2   | C6   | C5   | 120.85(14) |
| N2   | C6   | C7   | 108.28(14) |
| C5   | C6   | C7   | 130.84(16) |
| C8   | C7   | C6   | 107.59(15) |
| C7   | C8   | C9   | 106.00(15) |
| N2   | C9   | Cl2  | 121.94(14) |
| N2   | C9   | C8   | 111.83(15) |
| C8   | C9   | Cl2  | 126.21(14) |
| C11  | C10  | C5   | 120.80(14) |
| C11  | C10  | C15  | 119.60(15) |
| C15  | C10  | C5   | 119.60(14) |
| C12  | C11  | C10  | 120.06(15) |
| C11  | C12  | C13  | 120.42(15) |
| C12  | C13  | C16  | 122.11(15) |
| C14  | C13  | C12  | 119.53(15) |
| C14  | C13  | C16  | 118.35(14) |
| C15  | C14  | C13  | 120.50(15) |
| C14  | C15  | C10  | 119.88(15) |
| O1   | C16  | C13  | 111.92(14) |
| O2   | C16  | O1   | 123.60(16) |
| O2   | C16  | C13  | 124.48(16) |
| F1   | B    | F2   | 111.55(14) |
| F1   | B    | N1   | 110.90(14) |
| F1   | B    | N2   | 110.55(14) |
| F2   | B    | N1   | 109.71(13) |
| F2   | B    | N2   | 108.90(14) |
| N2   | B    | N1   | 105.02(13) |

Table S 10: Torsion Angles in ° for BODIPY 2.

| Atom | Atom | Atom | Atom | Angle/°     |
|------|------|------|------|-------------|
| Cl1  | C1   | C2   | C3   | -178.93(13) |
| N1   | C1   | C2   | C3   | -0.2(2)     |
| N1   | C4   | C5   | C6   | 0.8(2)      |
| N1   | C4   | C5   | C10  | -176.80(14) |
| N2   | C6   | C7   | C8   | -0.87(19)   |
| C1   | N1   | C4   | C3   | -0.55(18)   |
| C1   | N1   | C4   | C5   | 175.51(15)  |
| C1   | N1   | B    | F1   | -53.0(2)    |
| C1   | N1   | B    | F2   | 70.6(2)     |
| C1   | N1   | B    | N2   | -172.47(15) |
| C1   | C2   | C3   | C4   | -0.17(19)   |
| C2   | C3   | C4   | N1   | 0.45(19)    |
| C2   | C3   | C4   | C5   | -175.11(17) |
| C3   | C4   | C5   | C6   | 175.88(17)  |
| C3   | C4   | C5   | C10  | -1.7(3)     |
| C4   | N1   | C1   | Cl1  | 179.27(12)  |
| C4   | N1   | C1   | C2   | 0.46(19)    |
| C4   | N1   | B    | F1   | 129.52(16)  |
| C4   | N1   | B    | F2   | -106.80(17) |
| C4   | N1   | B    | N2   | 10.1(2)     |
| C4   | C5   | C6   | N2   | -0.7(2)     |
| C4   | C5   | C6   | C7   | -178.81(17) |
| C4   | C5   | C10  | C11  | -52.7(2)    |
| C4   | C5   | C10  | C15  | 127.37(17)  |
| C5   | C6   | C7   | C8   | 177.47(17)  |
| C5   | C10  | C11  | C12  | -179.84(15) |
| C5   | C10  | C15  | C14  | 179.93(15)  |
| C6   | N2   | C9   | Cl2  | -178.98(12) |
| C6   | N2   | C9   | C8   | -0.53(19)   |
| C6   | N2   | B    | F1   | -129.66(16) |
| C6   | N2   | B    | F2   | 107.45(17)  |
| C6   | N2   | B    | N1   | -10.0(2)    |
| C6   | C5   | C10  | C11  | 129.68(17)  |
| C6   | C5   | C10  | C15  | -50.3(2)    |

| Atom | Atom | Atom | Atom | Angle/°     |
|------|------|------|------|-------------|
| C6   | C7   | C8   | C9   | 0.5(2)      |
| C7   | C8   | C9   | Cl2  | 178.36(13)  |
| C7   | C8   | C9   | N2   | 0.0(2)      |
| C9   | N2   | C6   | C5   | -177.69(15) |
| C9   | N2   | C6   | C7   | 0.85(18)    |
| C9   | N2   | B    | F1   | 55.2(2)     |
| C9   | N2   | B    | F2   | -67.7(2)    |
| C9   | N2   | B    | N1   | 174.85(15)  |
| C10  | C5   | C6   | N2   | 176.96(14)  |
| C10  | C5   | C6   | C7   | -1.2(3)     |
| C10  | C11  | C12  | C13  | -0.2(2)     |
| C11  | C10  | C15  | C14  | 0.0(2)      |
| C11  | C12  | C13  | C14  | 0.2(2)      |
| C11  | C12  | C13  | C16  | -178.70(15) |
| C12  | C13  | C14  | C15  | -0.1(2)     |
| C12  | C13  | C16  | O1   | -1.4(2)     |
| C12  | C13  | C16  | O2   | 177.73(17)  |
| C13  | C14  | C15  | C10  | 0.0(2)      |
| C14  | C13  | C16  | O1   | 179.69(14)  |
| C14  | C13  | C16  | O2   | -1.2(3)     |
| C15  | C10  | C11  | C12  | 0.1(2)      |
| C16  | C13  | C14  | C15  | 178.82(15)  |
| C17  | O1   | C16  | O2   | -3.5(2)     |
| C17  | O1   | C16  | C13  | 175.59(14)  |
| B    | N1   | C1   | Cl1  | 1.4(2)      |
| B    | N1   | C1   | C2   | -177.38(15) |
| B    | N1   | C4   | C3   | 177.35(14)  |
| B    | N1   | C4   | C5   | -6.6(2)     |
| B    | N2   | C6   | C5   | 6.3(2)      |
| B    | N2   | C6   | C7   | -175.14(14) |
| B    | N2   | C9   | Cl2  | -3.1(2)     |
| B    | N2   | C9   | C8   | 175.40(15)  |

Table S11: Hydrogen Fractional Atomic Coordinates ( $\times 10^4$ ) and Equivalent Isotropic Displacement Parameters ( $\text{\AA}^2 \times 10^3$ ) for BODIPY 2.  $U_{eq}$  is defined as 1/3 of the trace of the orthogonalised  $U_{ij}$ .

| Atom | x        | y        | z        | $U_{eq}$ |
|------|----------|----------|----------|----------|
| H2   | 13226.21 | 4743.83  | 4441.68  | 23       |
| H3   | 11173.17 | 5021.46  | 5974.06  | 21       |
| H7   | 8386.56  | 1158.54  | 8701.77  | 23       |
| H8   | 8960.02  | -1192.17 | 8630.74  | 27       |
| H11  | 11189.14 | 5147.15  | 8361.14  | 19       |
| H12  | 9421.5   | 6593.19  | 9116.74  | 19       |
| H14  | 5108.37  | 3795.39  | 7758.47  | 20       |
| H15  | 6863.3   | 2336.26  | 7001.97  | 20       |
| H17A | 4981.76  | 8604.71  | 9122.65  | 40       |
| H17B | 6517.65  | 9202.44  | 10387.36 | 40       |
| H17C | 5012.35  | 8044.87  | 10491.02 | 40       |

Submitted by: **Jacques Pliquett**Solved by: **Yoann Rousselin**Sample ID: **16jpl23\_2**

## Crystal Data and Experimental

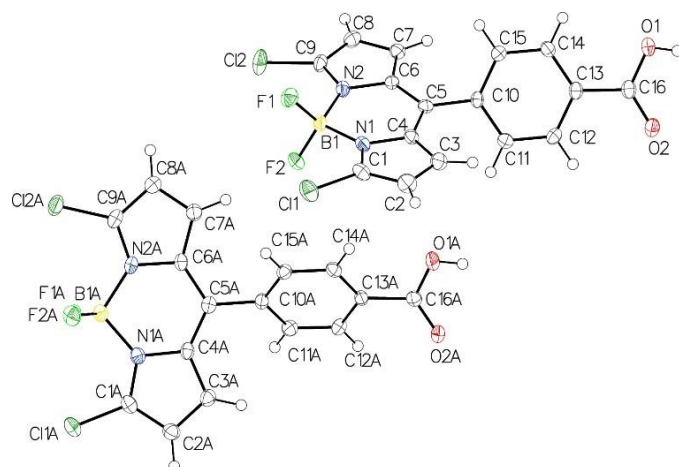

**Experimental.** Single clear light pink needle-shaped crystals of (**Compound 3**) were recrystallised from a mixture of DCM and methanol by slow evaporation. A suitable crystal (0.60x0.41x0.27) mm<sup>3</sup> was selected and mounted on a MITIGEN holder oil on a Nonius Kappa APEX-II diffractometer. The crystal was kept at  $T = 115(1)$  K during data collection. Using **Olex2** (Dolomanov et al., 2009), the structure was solved with the **ShelXT** (Sheldrick, 2015) structure solution program, using the Direct Methods solution method. The model was refined with version 2018/1 of **ShelXL** (Sheldrick, 2015) using Least Squares minimisation.

**Crystal Data.** C<sub>16</sub>H<sub>9</sub>BCl<sub>2</sub>F<sub>2</sub>N<sub>2</sub>O<sub>2</sub>,  $M_r = 380.96$ , triclinic, P-1 (No. 2),  $a = 10.9208(5)$  Å,  $b = 11.1413(5)$  Å,  $c = 14.0873(6)$  Å,  $\alpha = 69.876(3)^\circ$ ,  $\beta = 75.945(3)^\circ$ ,  $\gamma = 75.941(3)^\circ$ ,  $V = 1537.13(12)$  Å<sup>3</sup>,  $T = 115(1)$  K,  $Z = 4$ ,  $Z' = 2$ ,  $\mu(\text{MoK}\alpha) = 0.458$ , 37815 reflections measured, 7063 unique ( $R_{int} = 0.0455$ ) which were used in all calculations. The final  $wR_2$  was 0.0950 (all data) and  $R_1$  was 0.0368 ( $I > 2(I)$ ).

Table S 12: X-ray structure data of BODIPY3.

| Compound                     | Compound 3                                                                                   |
|------------------------------|----------------------------------------------------------------------------------------------|
| <b>CCDC</b>                  | <b>1825950</b>                                                                               |
| Formula                      | C <sub>16</sub> H <sub>9</sub> BCl <sub>2</sub> F <sub>2</sub> N <sub>2</sub> O <sub>2</sub> |
| $D_{calc.}/\text{g cm}^{-3}$ | 1.646                                                                                        |
| $\mu/\text{mm}^{-1}$         | 0.458                                                                                        |
| Formula Weight               | 380.96                                                                                       |
| Colour                       | clear light pink                                                                             |
| Shape                        | needle                                                                                       |
| Size/mm <sup>3</sup>         | 0.60x0.41x0.27                                                                               |
| $T/\text{K}$                 | 115(1)                                                                                       |
| Crystal System               | triclinic                                                                                    |
| Space Group                  | P-1                                                                                          |
| $a/\text{Å}$                 | 10.9208(5)                                                                                   |
| $b/\text{Å}$                 | 11.1413(5)                                                                                   |
| $c/\text{Å}$                 | 14.0873(6)                                                                                   |
| $\alpha/^\circ$              | 69.876(3)                                                                                    |
| $\beta/^\circ$               | 75.945(3)                                                                                    |
| $\gamma/^\circ$              | 75.941(3)                                                                                    |
| $V/\text{Å}^3$               | 1537.13(12)                                                                                  |
| $Z$                          | 4                                                                                            |
| $Z'$                         | 2                                                                                            |
| Wavelength/Å                 | 0.71073                                                                                      |
| Radiation type               | MoK $\alpha$                                                                                 |
| $\theta_{min}/^\circ$        | 1.564                                                                                        |
| $\theta_{max}/^\circ$        | 27.499                                                                                       |
| Measured Refl.               | 37815                                                                                        |
| Independent Refl.            | 7063                                                                                         |
| Reflections Used             | 5037                                                                                         |
| $R_{int}$                    | 0.0455                                                                                       |
| Parameters                   | 453                                                                                          |
| Restraints                   | 0                                                                                            |
| Largest Peak                 | 0.365                                                                                        |
| Deepest Hole                 | -0.348                                                                                       |
| GooF                         | 1.017                                                                                        |
| $wR_2$ (all data)            | 0.0950                                                                                       |
| $wR_2$                       | 0.0820                                                                                       |
| $R_1$ (all data)             | 0.0653                                                                                       |
| $R_1$                        | 0.0368                                                                                       |



Table S 13: BODIPY 3 structure Quality Indicators.

|                     |            |        |            |      |                  |       |          |       |
|---------------------|------------|--------|------------|------|------------------|-------|----------|-------|
| <b>Reflections:</b> | d min (Mo) | 0.77   | $I/\sigma$ | 18.9 | R <sub>int</sub> | 4.55% | complete | 100%  |
| <b>Refinement:</b>  | Shift      | -0.001 | Max Peak   | 0.4  | Min Peak         | -0.3  | Goof     | 1.017 |

A clear light pink needle-shaped crystal with dimensions 0.60x0.41x0.27 mm<sup>3</sup> was mounted on a MITIGEN holder oil. X-ray diffraction data were collected using a Nonius Kappa APEX-II diffractometer equipped with a Oxford Cryosystems low-temperature device, operating at  $T = 115(1)$  K. Data were measured using  $\phi$  and  $\omega$  scans of 2° per frame for 10s using MoK $\alpha$  radiation (X-ray tube, 50 kV, 32 mA). The total number of runs and images was based on the strategy calculation from the program APEX3 (Bruker, 2015). The maximum resolution achieved was  $\theta = 27.499^\circ$ . Cell parameters were retrieved using the **SAINT** (Bruker, V8.34A, after 2013) software and refined using **SAINT** (Bruker, V8.34A, after 2013) on 9455 reflections, 25 % of the observed reflections. Data reduction was performed using the **SAINT** (Bruker, V8.34A, after 2013) software which corrects for Lorentz polarisation. The final completeness is 99.90 % out to 27.499° in  $\theta$ . A multi-scan absorption correction was performed using SADABS-2014/5 (Bruker, 2014) was used for absorption correction.  $wR_2(\text{int})$  was 0.0541 before and 0.0473 after correction. The Ratio of minimum to maximum transmission is 0.9065. The  $\lambda/2$  correction factor is 0.00150. The absorption coefficient  $\mu$  of this material is 0.458 mm<sup>-1</sup> at this wavelength ( $\lambda = 0.71073\text{\AA}$ ) and the minimum and maximum transmissions are 0.6759 and 0.7456. The structure was solved in the space group P-1 (# 2) by Direct Methods using the **ShelXT** (Sheldrick, 2015) structure solution program and refined by Least Squares using version 2018/1 of **ShelXL** (Sheldrick, 2015). All non-hydrogen atoms were refined anisotropically. Hydrogen atom positions were calculated geometrically and refined using the riding model. SADABS-2014/5 (Bruker, 2014) was used for absorption correction.  $wR_2(\text{int})$  was 0.0541 before and 0.0473 after correction. The Ratio of minimum to maximum transmission is 0.9065. The  $\lambda/2$  correction factor is 0.00150. The value of Z' is 2. This means that there are two independent molecules in the asymmetric unit.

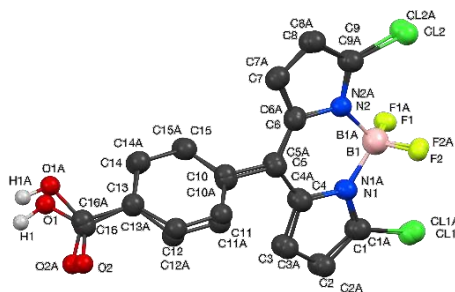

Figure S 125: Overlay view of both molecules present in asymmetric unit (RMSD = 0.24 Å).

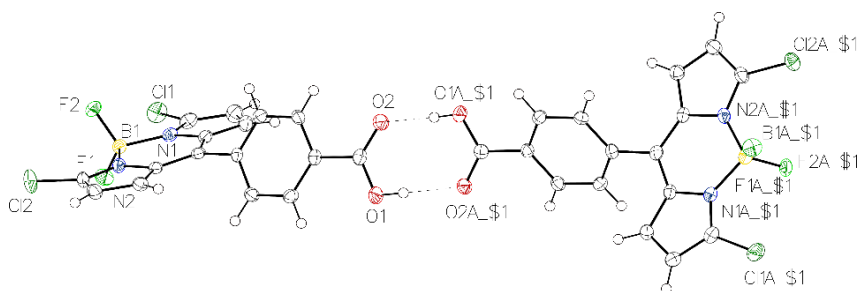

Figure S 126: ORTEP view of hydrogen bonds. Thermal ellipsoids are draw at 50% probability level.

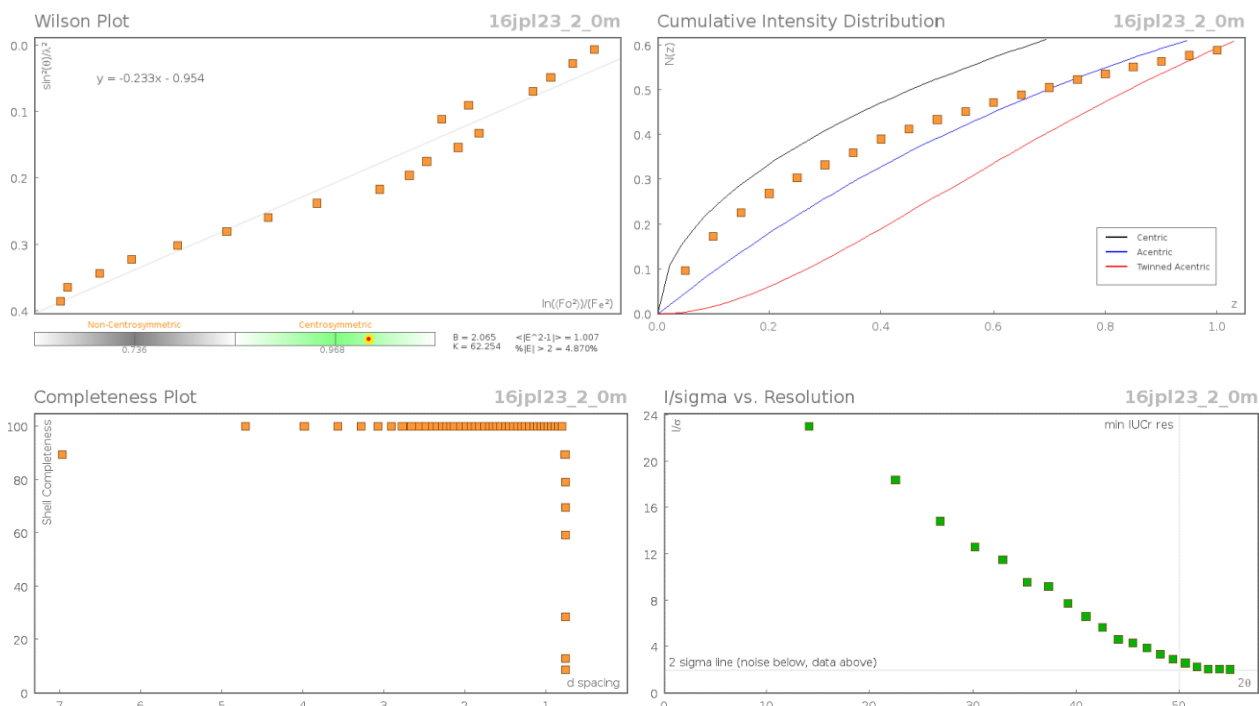

Figure S 127: Data Plots: Diffraction Data of BODIPY3 structure.

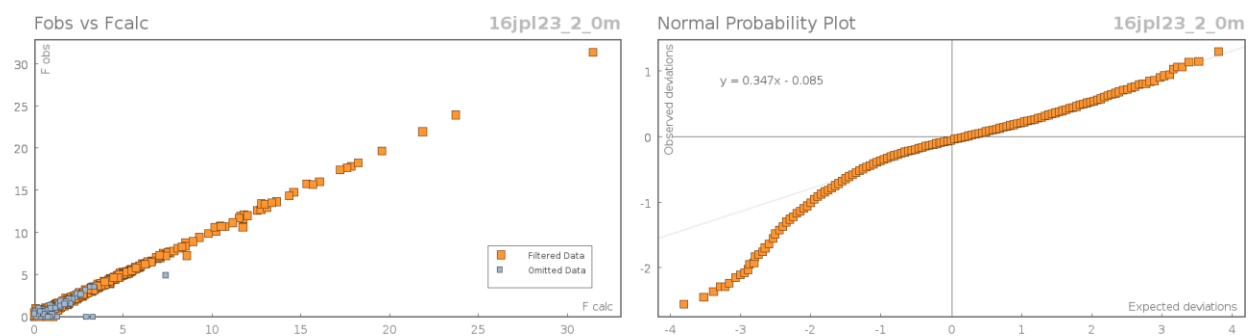

Figure S 128: Data Plots: refinement and Data of BODIPY 3 structure.

Table S 14: reflection statistics of BODIPY 3 structure.

|                                     |                                            |                            |                 |
|-------------------------------------|--------------------------------------------|----------------------------|-----------------|
| Total reflections (after filtering) | 37834                                      | Unique reflections         | 7063            |
| Completeness                        | 0.999                                      | Mean $I/\sigma$            | 18.87           |
| $hkl_{\max}$ collected              | (14, 14, 18)                               | $hkl_{\min}$ collected     | (-14, -14, -18) |
| $hkl_{\max}$ used                   | (14, 14, 18)                               | $hkl_{\min}$ used          | (-13, -13, 0)   |
| Lim $d_{\max}$ collected            | 100.0                                      | Lim $d_{\min}$ collected   | 0.77            |
| $d_{\max}$ used                     | 13.02                                      | $d_{\min}$ used            | 0.77            |
| Friedel pairs                       | 6968                                       | Friedel pairs merged       | 1               |
| Inconsistent equivalents            | 0                                          | $R_{\text{int}}$           | 0.0455          |
| $R_{\text{sigma}}$                  | 0.0404                                     | Intensity transformed      | 0               |
| Omitted reflections                 | 0                                          | Omitted by user (OMIT hkl) | 19              |
| Multiplicity                        | (2285, 5067, 3479, 1749, 1245, 279, 31, 3) | Maximum multiplicity       | 13              |
| Removed systematic absences         | 0                                          | Filtered off (Shel/OMIT)   | 158             |

Table S 15: Fractional Atomic Coordinates ( $\times 10^4$ ) and Equivalent Isotropic Displacement Parameters ( $\text{\AA}^2 \times 10^3$ ) for BODIPY 3.  $U_{eq}$  is defined as 1/3 of the trace of the orthogonalised  $U_{ij}$ .

| Atom | x          | y           | z           | $U_{eq}$  |
|------|------------|-------------|-------------|-----------|
| Cl1  | 2868.0(6)  | 9837.2(6)   | 6303.2(4)   | 31.88(14) |
| Cl2  | -580.7(6)  | 6135.4(6)   | 6594.9(4)   | 34.20(15) |
| F1   | 422.7(12)  | 8732.6(12)  | 6359.6(9)   | 26.7(3)   |
| F2   | 2119.5(11) | 7149.8(11)  | 6155.6(9)   | 24.5(3)   |
| O1   | 1573.6(14) | 11872.1(16) | -1487.5(11) | 28.3(4)   |
| O2   | 3651.1(15) | 11047.9(16) | -1481.7(11) | 32.8(4)   |
| N1   | 2091.1(16) | 9252.8(16)  | 4883.2(12)  | 18.4(4)   |
| N2   | 616.4(16)  | 7805.1(16)  | 5001.4(12)  | 18.1(4)   |
| C1   | 2758(2)    | 9978(2)     | 5081.7(16)  | 23.2(5)   |
| C2   | 3338(2)    | 10802(2)    | 4185.4(17)  | 27.7(5)   |
| C3   | 3016(2)    | 10575(2)    | 3382.9(16)  | 23.2(5)   |
| C4   | 2239.7(19) | 9611.2(19)  | 3812.5(15)  | 18.0(4)   |
| C5   | 1585.9(18) | 9104.7(19)  | 3346.6(15)  | 17.1(4)   |
| C6   | 775.3(18)  | 8217.8(19)  | 3931.0(14)  | 16.9(4)   |
| C7   | 64.1(19)   | 7553(2)     | 3635.5(15)  | 20.0(4)   |
| C8   | -527(2)    | 6737(2)     | 4516.4(16)  | 23.1(5)   |
| C9   | -159(2)    | 6917(2)     | 5327.4(15)  | 20.9(4)   |
| C10  | 1771.2(19) | 9521.1(18)  | 2210.3(14)  | 16.2(4)   |
| C11  | 3004.4(19) | 9328.5(19)  | 1651.7(15)  | 18.9(4)   |
| C12  | 3218.5(19) | 9799.6(19)  | 597.6(15)   | 19.5(4)   |
| C13  | 2205(2)    | 10500.1(19) | 84.1(15)    | 18.9(4)   |
| C14  | 960(2)     | 10648(2)    | 632.9(15)   | 20.7(4)   |
| C15  | 742.8(19)  | 10148(2)    | 1692.1(15)  | 20.1(4)   |
| C16  | 2529(2)    | 11157(2)    | -1033.9(15) | 20.8(4)   |
| B1   | 1303(2)    | 8215(2)     | 5662.2(17)  | 18.8(5)   |
| Cl1A | 7386.9(6)  | 2067.3(6)   | 11226.0(4)  | 30.42(14) |
| Cl2A | 1667.3(5)  | 3289.2(6)   | 11205.1(4)  | 29.57(14) |
| F1A  | 4541.3(12) | 3617.5(12)  | 11161.8(9)  | 27.7(3)   |
| F2A  | 4591.9(12) | 1730.1(11)  | 10870.0(9)  | 25.6(3)   |
| O1A  | 5555.8(14) | 7879.2(15)  | 3413.1(11)  | 26.3(3)   |
| O2A  | 7465.7(14) | 6575.4(14)  | 3302.1(10)  | 23.8(3)   |
| N1A  | 6029.3(16) | 3156.1(16)  | 9709.1(12)  | 19.0(4)   |
| N2A  | 3685.1(16) | 3720.0(16)  | 9703.5(12)  | 18.8(4)   |

| Atom | x          | y          | z           | $U_{eq}$ |
|------|------------|------------|-------------|----------|
| C1A  | 7191(2)    | 2813(2)    | 9979.8(16)  | 22.6(4)  |
| C2A  | 8162(2)    | 3143(2)    | 9137.1(16)  | 24.3(5)  |
| C3A  | 7554(2)    | 3728(2)    | 8300.9(16)  | 22.2(4)  |
| C4A  | 6231.2(19) | 3730.3(19) | 8646.5(15)  | 18.3(4)  |
| C5A  | 5204.6(19) | 4283.9(18) | 8117.7(15)  | 17.5(4)  |
| C6A  | 3943.2(19) | 4285.9(19) | 8639.3(15)  | 18.0(4)  |
| C7A  | 2765(2)    | 4765(2)    | 8284.8(16)  | 21.9(4)  |
| C8A  | 1796(2)    | 4511(2)    | 9118.6(16)  | 25.2(5)  |
| C9A  | 2405(2)    | 3864(2)    | 9968.7(16)  | 22.4(4)  |
| C10A | 5465.8(19) | 4934.0(19) | 6993.3(15)  | 17.9(4)  |
| C11A | 6356.6(19) | 4298(2)    | 6342.7(15)  | 20.1(4)  |
| C12A | 6654.0(19) | 4929(2)    | 5306.4(15)  | 19.6(4)  |
| C13A | 6040.2(19) | 6190.8(19) | 4899.2(14)  | 17.4(4)  |
| C14A | 5119.2(19) | 6809(2)    | 5531.6(15)  | 18.7(4)  |
| C15A | 4846.1(19) | 6195.8(19) | 6576.6(15)  | 18.8(4)  |
| C16A | 6404.0(19) | 6898(2)    | 3798.0(15)  | 18.8(4)  |
| B1A  | 4700(2)    | 3021(2)    | 10423.5(17) | 19.8(5)  |

Table S 16: Anisotropic Displacement Parameters ( $\times 10^4$ ) BODIPY3. The anisotropic displacement factor exponent takes the form:  $-2\pi^2[h^2a^{\ast 2} \times U_{11} + \dots + 2hka^{\ast} \times b^{\ast} \times U_{12}]$

| Atom | $U_{11}$ | $U_{22}$ | $U_{33}$ | $U_{23}$ | $U_{13}$ | $U_{12}$ |
|------|----------|----------|----------|----------|----------|----------|
| Cl1  | 40.5(3)  | 36.2(3)  | 26.5(3)  | -12.9(2) | -13.0(2) | -8.5(3)  |
| Cl2  | 46.8(4)  | 34.5(3)  | 18.9(3)  | -2.8(2)  | 4.0(2)   | -20.4(3) |
| F1   | 25.7(7)  | 31.8(7)  | 23.6(6)  | -14.6(6) | 0.4(5)   | -2.5(5)  |
| F2   | 26.1(7)  | 22.0(6)  | 21.8(6)  | -1.2(5)  | -9.4(5)  | -0.1(5)  |
| O1   | 27.0(9)  | 35.5(9)  | 15.8(8)  | 0.9(7)   | -3.7(6)  | -6.3(7)  |
| O2   | 25.3(9)  | 40(1)    | 20.0(8)  | 0.6(7)   | 0.3(6)   | -0.3(7)  |
| N1   | 19.7(9)  | 19.1(9)  | 16.9(8)  | -5.6(7)  | -6.2(7)  | -0.7(7)  |
| N2   | 20.4(9)  | 16.6(9)  | 15.0(8)  | -3.0(7)  | -2.0(7)  | -2.7(7)  |
| C1   | 26.6(12) | 21.9(11) | 24.4(11) | -8.5(9)  | -11.1(9) | -1.4(9)  |
| C2   | 30.2(13) | 24.5(12) | 30.9(12) | -6.8(10) | -8(1)    | -9.1(10) |
| C3   | 24.4(11) | 19.4(11) | 24.4(11) | -2.3(9)  | -5.3(9)  | -6.3(9)  |
| C4   | 18.5(10) | 16.3(10) | 17.4(10) | -3.3(8)  | -4.7(8)  | -0.9(8)  |
| C5   | 14.8(10) | 16(1)    | 18.7(10) | -4.9(8)  | -4.1(8)  | 1.5(8)   |
| C6   | 14.8(10) | 17.4(10) | 16.1(10) | -4.7(8)  | -2.2(8)  | 0.5(8)   |
| C7   | 18.8(10) | 23.6(11) | 18.8(10) | -7.4(8)  | -4.7(8)  | -3.0(8)  |

| Atom | $U_{11}$ | $U_{22}$ | $U_{33}$ | $U_{23}$ | $U_{13}$ | $U_{12}$ |
|------|----------|----------|----------|----------|----------|----------|
| C8   | 20.5(11) | 23.1(11) | 25.9(11) | -6.8(9)  | -2.3(9)  | -6.9(9)  |
| C9   | 22.6(11) | 18.8(10) | 17.1(10) | -1.0(8)  | 0.6(8)   | -6.3(8)  |
| C10  | 20.2(10) | 12.8(9)  | 14.2(9)  | -2.4(7)  | -1.6(8)  | -4.5(8)  |
| C11  | 18.6(10) | 17.7(10) | 20.5(10) | -5.2(8)  | -5.2(8)  | -2.2(8)  |
| C12  | 18.6(10) | 17.8(10) | 20.6(10) | -5.4(8)  | 1.0(8)   | -5.4(8)  |
| C13  | 24.0(11) | 16.2(10) | 16.4(10) | -4.6(8)  | -2.0(8)  | -5.6(8)  |
| C14  | 20.7(11) | 23.1(11) | 17.3(10) | -5.4(8)  | -5.8(8)  | -0.5(9)  |
| C15  | 17.3(10) | 23.4(11) | 18.6(10) | -6.4(8)  | -1.8(8)  | -3.2(8)  |
| C16  | 26.0(12) | 17.4(10) | 18.5(10) | -4.7(8)  | -3.3(9)  | -4.3(9)  |
| B1   | 20.1(12) | 19.8(12) | 14.0(11) | -4.5(9)  | -1.9(9)  | -1.1(9)  |
| Cl1A | 32.8(3)  | 33.7(3)  | 22.0(3)  | -3.2(2)  | -11.2(2) | -2.0(2)  |
| Cl2A | 28.5(3)  | 33.0(3)  | 21.0(3)  | -5.6(2)  | 4.6(2)   | -6.9(2)  |
| F1A  | 32.3(7)  | 31.4(7)  | 23.4(6)  | -15.6(6) | -5.4(5)  | -1.7(6)  |
| F2A  | 29.9(7)  | 17.9(6)  | 22.9(6)  | -0.2(5)  | 0.3(5)   | -6.4(5)  |
| O1A  | 27.4(9)  | 26.6(8)  | 16.9(7)  | 1.2(6)   | -3.5(6)  | -2.0(7)  |
| O2A  | 22.8(8)  | 29.6(8)  | 15.5(7)  | -4.7(6)  | -1.0(6)  | -3.4(6)  |
| N1A  | 22.0(9)  | 15.6(9)  | 18.5(9)  | -3.7(7)  | -4.3(7)  | -3.2(7)  |
| N2A  | 21.6(9)  | 18.1(9)  | 15.2(8)  | -4.1(7)  | 0.7(7)   | -5.8(7)  |
| C1A  | 27.7(12) | 19.2(11) | 21.0(11) | -3.6(9)  | -8.0(9)  | -3.9(9)  |
| C2A  | 21.7(11) | 22.7(11) | 26.3(11) | -3.8(9)  | -6.7(9)  | -2.5(9)  |
| C3A  | 22.1(11) | 19.1(11) | 21.7(11) | -2.9(8)  | -0.6(8)  | -4.8(8)  |
| C4A  | 22.3(11) | 14.9(10) | 16.1(10) | -3.5(8)  | -1.5(8)  | -3.6(8)  |
| C5A  | 21.8(11) | 12.5(9)  | 18.5(10) | -6.2(8)  | -1.8(8)  | -3.1(8)  |
| C6A  | 22.7(11) | 15.2(10) | 15.1(10) | -3.6(8)  | -2.5(8)  | -4.0(8)  |
| C7A  | 22.6(11) | 22.3(11) | 20.5(10) | -5.6(9)  | -4.0(8)  | -4.6(9)  |
| C8A  | 21.1(11) | 29.9(12) | 23.7(11) | -7.7(9)  | -1.9(9)  | -5.4(9)  |
| C9A  | 23.7(11) | 21.8(11) | 19.9(10) | -7.4(9)  | 3.2(8)   | -6.3(9)  |
| C10A | 19.3(10) | 19.7(10) | 15.2(10) | -4.5(8)  | -2.0(8)  | -6.1(8)  |
| C11A | 19.9(11) | 15.7(10) | 22.7(11) | -4.6(8)  | -3.5(8)  | -1.5(8)  |
| C12A | 19.1(10) | 19.9(11) | 18.9(10) | -6.8(8)  | 0.2(8)   | -4.3(8)  |
| C13A | 17.9(10) | 19.2(10) | 15(1)    | -3.0(8)  | -4.0(8)  | -5.1(8)  |
| C14A | 19.6(10) | 16.5(10) | 20(1)    | -3.8(8)  | -6.2(8)  | -2.7(8)  |
| C15A | 17.3(10) | 18.9(10) | 19.2(10) | -6.5(8)  | -1.4(8)  | -2.0(8)  |
| C16A | 19.8(10) | 19.8(11) | 18.9(10) | -5.8(8)  | -5.1(8)  | -5.8(8)  |
| B1A  | 24.4(13) | 17.2(11) | 17.1(11) | -5.3(9)  | -3.3(9)  | -2.8(9)  |

Table S 17: Bond Lengths in Å for BODIPY 3.

| Atom | Atom | Length/Å | Atom | Atom | Length/Å |
|------|------|----------|------|------|----------|
| Cl1  | C1   | 1.704(2) | Cl1A | C1A  | 1.706(2) |
| Cl2  | C9   | 1.698(2) | Cl2A | C9A  | 1.701(2) |
| F1   | B1   | 1.373(2) | F1A  | B1A  | 1.373(2) |
| F2   | B1   | 1.380(3) | F2A  | B1A  | 1.380(3) |
| O1   | C16  | 1.304(3) | O1A  | C16A | 1.301(2) |
| O2   | C16  | 1.233(3) | O2A  | C16A | 1.240(2) |
| N1   | C1   | 1.343(3) | N1A  | C1A  | 1.341(3) |
| N1   | C4   | 1.400(2) | N1A  | C4A  | 1.396(3) |
| N1   | B1   | 1.560(3) | N1A  | B1A  | 1.561(3) |
| N2   | C6   | 1.396(2) | N2A  | C6A  | 1.398(2) |
| N2   | C9   | 1.346(3) | N2A  | C9A  | 1.341(3) |
| N2   | B1   | 1.561(3) | N2A  | B1A  | 1.564(3) |
| C1   | C2   | 1.391(3) | C1A  | C2A  | 1.395(3) |
| C2   | C3   | 1.378(3) | C2A  | C3A  | 1.376(3) |
| C3   | C4   | 1.408(3) | C3A  | C4A  | 1.408(3) |
| C4   | C5   | 1.392(3) | C4A  | C5A  | 1.395(3) |
| C5   | C6   | 1.396(3) | C5A  | C6A  | 1.395(3) |
| C5   | C10  | 1.482(3) | C5A  | C10A | 1.485(3) |
| C6   | C7   | 1.405(3) | C6A  | C7A  | 1.409(3) |
| C7   | C8   | 1.379(3) | C7A  | C8A  | 1.376(3) |
| C8   | C9   | 1.388(3) | C8A  | C9A  | 1.399(3) |
| C10  | C11  | 1.393(3) | C10A | C11A | 1.403(3) |
| C10  | C15  | 1.396(3) | C10A | C15A | 1.393(3) |
| C11  | C12  | 1.375(3) | C11A | C12A | 1.380(3) |
| C12  | C13  | 1.392(3) | C12A | C13A | 1.389(3) |
| C13  | C14  | 1.393(3) | C13A | C14A | 1.389(3) |
| C13  | C16  | 1.484(3) | C13A | C16A | 1.482(3) |
| C14  | C15  | 1.383(3) | C14A | C15A | 1.384(3) |

Table S 18: Bond Angles in ° for BODIPY 3.

| Atom | Atom | Atom | Angle/°    | Atom | Atom | Atom | Angle/°    |
|------|------|------|------------|------|------|------|------------|
| C1   | N1   | C4   | 105.92(17) | C14  | C15  | C10  | 120.03(19) |
| C1   | N1   | B1   | 128.30(17) | O1   | C16  | C13  | 116.22(18) |
| C4   | N1   | B1   | 125.78(16) | O2   | C16  | O1   | 123.22(19) |
| C6   | N2   | B1   | 126.15(16) | O2   | C16  | C13  | 120.52(19) |
| C9   | N2   | C6   | 105.90(16) | F1   | B1   | F2   | 110.69(17) |
| C9   | N2   | B1   | 127.76(17) | F1   | B1   | N1   | 110.63(17) |
| N1   | C1   | Cl1  | 122.02(16) | F1   | B1   | N2   | 110.63(17) |
| N1   | C1   | C2   | 111.80(18) | F2   | B1   | N1   | 109.93(17) |
| C2   | C1   | Cl1  | 126.17(17) | F2   | B1   | N2   | 109.32(17) |
| C3   | C2   | C1   | 106.43(19) | N1   | B1   | N2   | 105.50(15) |
| C2   | C3   | C4   | 107.25(19) | C1A  | N1A  | C4A  | 106.09(17) |
| N1   | C4   | C3   | 108.61(17) | C1A  | N1A  | B1A  | 127.98(17) |
| C5   | C4   | N1   | 120.74(18) | C4A  | N1A  | B1A  | 125.85(17) |
| C5   | C4   | C3   | 130.44(19) | C6A  | N2A  | B1A  | 126.31(17) |
| C4   | C5   | C6   | 121.11(18) | C9A  | N2A  | C6A  | 106.21(17) |
| C4   | C5   | C10  | 118.61(17) | C9A  | N2A  | B1A  | 127.45(17) |
| C6   | C5   | C10  | 120.29(17) | N1A  | C1A  | Cl1A | 121.73(16) |
| N2   | C6   | C7   | 108.41(17) | N1A  | C1A  | C2A  | 112.08(18) |
| C5   | C6   | N2   | 120.44(17) | C2A  | C1A  | Cl1A | 126.19(17) |
| C5   | C6   | C7   | 131.07(18) | C3A  | C2A  | C1A  | 105.57(19) |
| C8   | C7   | C6   | 107.73(18) | C2A  | C3A  | C4A  | 108.07(18) |
| C7   | C8   | C9   | 105.97(18) | N1A  | C4A  | C3A  | 108.18(17) |
| N2   | C9   | Cl2  | 121.60(16) | C5A  | C4A  | N1A  | 121.16(18) |
| N2   | C9   | C8   | 111.97(18) | C5A  | C4A  | C3A  | 130.41(19) |
| C8   | C9   | Cl2  | 126.42(16) | C4A  | C5A  | C10A | 119.18(18) |
| C11  | C10  | C5   | 119.11(17) | C6A  | C5A  | C4A  | 120.79(18) |
| C11  | C10  | C15  | 119.59(18) | C6A  | C5A  | C10A | 119.96(18) |
| C15  | C10  | C5   | 121.24(17) | N2A  | C6A  | C7A  | 108.12(17) |
| C12  | C11  | C10  | 120.35(19) | C5A  | C6A  | N2A  | 120.48(18) |
| C11  | C12  | C13  | 120.00(18) | C5A  | C6A  | C7A  | 131.39(19) |
| C12  | C13  | C14  | 119.99(18) | C8A  | C7A  | C6A  | 108.05(19) |
| C12  | C13  | C16  | 117.22(18) | C7A  | C8A  | C9A  | 105.71(19) |
| C14  | C13  | C16  | 122.58(19) | N2A  | C9A  | Cl2A | 122.03(16) |
| C15  | C14  | C13  | 119.83(19) | N2A  | C9A  | C8A  | 111.90(18) |

| Atom | Atom | Atom | Angle/°    | Atom | Atom | Atom | Angle/°    |
|------|------|------|------------|------|------|------|------------|
| C8A  | C9A  | C12A | 126.06(17) | C14A | C15A | C10A | 119.91(18) |
| C11A | C10A | C5A  | 120.52(18) | O1A  | C16A | C13A | 115.46(18) |
| C15A | C10A | C5A  | 120.18(17) | O2A  | C16A | O1A  | 123.51(18) |
| C15A | C10A | C11A | 119.29(18) | O2A  | C16A | C13A | 121.01(18) |
| C12A | C11A | C10A | 120.50(19) | F1A  | B1A  | F2A  | 110.61(17) |
| C11A | C12A | C13A | 119.78(18) | F1A  | B1A  | N1A  | 110.14(17) |
| C12A | C13A | C14A | 120.05(18) | F1A  | B1A  | N2A  | 110.39(17) |
| C12A | C13A | C16A | 120.01(18) | F2A  | B1A  | N1A  | 110.41(17) |
| C14A | C13A | C16A | 119.90(18) | F2A  | B1A  | N2A  | 109.82(17) |
| C15A | C14A | C13A | 120.39(19) | N1A  | B1A  | N2A  | 105.34(16) |

Table S 19: Torsion Angles in ° for BODIPY 3.

| Atom | Atom | Atom | Atom | Angle/°     |
|------|------|------|------|-------------|
| Cl1  | C1   | C2   | C3   | 178.68(17)  |
| N1   | C1   | C2   | C3   | -0.1(3)     |
| N1   | C4   | C5   | C6   | -0.6(3)     |
| N1   | C4   | C5   | C10  | 179.67(17)  |
| N2   | C6   | C7   | C8   | 0.0(2)      |
| C1   | N1   | C4   | C3   | -0.1(2)     |
| C1   | N1   | C4   | C5   | -175.24(18) |
| C1   | N1   | B1   | F1   | 54.1(3)     |
| C1   | N1   | B1   | F2   | -68.4(3)    |
| C1   | N1   | B1   | N2   | 173.82(18)  |
| C1   | C2   | C3   | C4   | 0.0(2)      |
| C2   | C3   | C4   | N1   | 0.0(2)      |
| C2   | C3   | C4   | C5   | 174.6(2)    |
| C3   | C4   | C5   | C6   | -174.6(2)   |
| C3   | C4   | C5   | C10  | 5.7(3)      |
| C4   | N1   | C1   | Cl1  | -178.72(15) |
| C4   | N1   | C1   | C2   | 0.1(2)      |
| C4   | N1   | B1   | F1   | -125.92(19) |
| C4   | N1   | B1   | F2   | 111.5(2)    |
| C4   | N1   | B1   | N2   | -6.2(3)     |
| C4   | C5   | C6   | N2   | -0.9(3)     |
| C4   | C5   | C6   | C7   | -177.4(2)   |



| Atom | Atom | Atom | Atom | Angle/°     |
|------|------|------|------|-------------|
| C4   | C5   | C10  | C11  | 57.5(3)     |
| C4   | C5   | C10  | C15  | -119.9(2)   |
| C5   | C6   | C7   | C8   | 176.9(2)    |
| C5   | C10  | C11  | C12  | -174.68(18) |
| C5   | C10  | C15  | C14  | 173.15(18)  |
| C6   | N2   | C9   | Cl2  | 178.72(15)  |
| C6   | N2   | C9   | C8   | -0.6(2)     |
| C6   | N2   | B1   | F1   | 124.4(2)    |
| C6   | N2   | B1   | F2   | -113.5(2)   |
| C6   | N2   | B1   | N1   | 4.7(3)      |
| C6   | C5   | C10  | C11  | -122.2(2)   |
| C6   | C5   | C10  | C15  | 60.4(3)     |
| C6   | C7   | C8   | C9   | -0.3(2)     |
| C7   | C8   | C9   | Cl2  | -178.69(17) |
| C7   | C8   | C9   | N2   | 0.6(2)      |
| C9   | N2   | C6   | C5   | -176.94(18) |
| C9   | N2   | C6   | C7   | 0.3(2)      |
| C9   | N2   | B1   | F1   | -61.4(3)    |
| C9   | N2   | B1   | F2   | 60.7(3)     |
| C9   | N2   | B1   | N1   | 178.92(18)  |
| C10  | C5   | C6   | N2   | 178.83(17)  |
| C10  | C5   | C6   | C7   | 2.2(3)      |
| C10  | C11  | C12  | C13  | 1.5(3)      |
| C11  | C10  | C15  | C14  | -4.2(3)     |
| C11  | C12  | C13  | C14  | -4.3(3)     |
| C11  | C12  | C13  | C16  | 170.55(18)  |
| C12  | C13  | C14  | C15  | 2.9(3)      |
| C12  | C13  | C16  | O1   | -175.96(18) |
| C12  | C13  | C16  | O2   | 1.9(3)      |
| C13  | C14  | C15  | C10  | 1.4(3)      |
| C14  | C13  | C16  | O1   | -1.2(3)     |
| C14  | C13  | C16  | O2   | 176.6(2)    |
| C15  | C10  | C11  | C12  | 2.7(3)      |
| C16  | C13  | C14  | C15  | -171.75(19) |
| B1   | N1   | C1   | Cl1  | 1.2(3)      |

| Atom | Atom | Atom | Atom | Angle/°     |
|------|------|------|------|-------------|
| B1   | N1   | C1   | C2   | -179.97(19) |
| B1   | N1   | C4   | C3   | 179.97(18)  |
| B1   | N1   | C4   | C5   | 4.8(3)      |
| B1   | N2   | C6   | C5   | -1.7(3)     |
| B1   | N2   | C6   | C7   | 175.59(18)  |
| B1   | N2   | C9   | Cl2  | 3.6(3)      |
| B1   | N2   | C9   | C8   | -175.70(19) |
| Cl1A | C1A  | C2A  | C3A  | -179.54(16) |
| N1A  | C1A  | C2A  | C3A  | 0.2(2)      |
| N1A  | C4A  | C5A  | C6A  | 0.4(3)      |
| N1A  | C4A  | C5A  | C10A | 177.38(17)  |
| N2A  | C6A  | C7A  | C8A  | 0.6(2)      |
| C1A  | N1A  | C4A  | C3A  | -0.7(2)     |
| C1A  | N1A  | C4A  | C5A  | -175.51(18) |
| C1A  | N1A  | B1A  | F1A  | 54.6(3)     |
| C1A  | N1A  | B1A  | F2A  | -67.8(3)    |
| C1A  | N1A  | B1A  | N2A  | 173.69(18)  |
| C1A  | C2A  | C3A  | C4A  | -0.6(2)     |
| C2A  | C3A  | C4A  | N1A  | 0.9(2)      |
| C2A  | C3A  | C4A  | C5A  | 175.0(2)    |
| C3A  | C4A  | C5A  | C6A  | -173.1(2)   |
| C3A  | C4A  | C5A  | C10A | 3.9(3)      |
| C4A  | N1A  | C1A  | Cl1A | -179.92(15) |
| C4A  | N1A  | C1A  | C2A  | 0.3(2)      |
| C4A  | N1A  | B1A  | F1A  | -121.9(2)   |
| C4A  | N1A  | B1A  | F2A  | 115.7(2)    |
| C4A  | N1A  | B1A  | N2A  | -2.8(2)     |
| C4A  | C5A  | C6A  | N2A  | -0.6(3)     |
| C4A  | C5A  | C6A  | C7A  | -179.4(2)   |
| C4A  | C5A  | C10A | C11A | 50.8(3)     |
| C4A  | C5A  | C10A | C15A | -127.8(2)   |
| C5A  | C6A  | C7A  | C8A  | 179.5(2)    |
| C5A  | C10A | C11A | C12A | -176.24(18) |
| C5A  | C10A | C15A | C14A | 178.27(18)  |
| C6A  | N2A  | C9A  | Cl2A | 179.15(15)  |

| Atom | Atom | Atom | Atom | Angle/°     |
|------|------|------|------|-------------|
| C6A  | N2A  | C9A  | C8A  | -0.2(2)     |
| C6A  | N2A  | B1A  | F1A  | 121.5(2)    |
| C6A  | N2A  | B1A  | F2A  | -116.3(2)   |
| C6A  | N2A  | B1A  | N1A  | 2.6(3)      |
| C6A  | C5A  | C10A | C11A | -132.2(2)   |
| C6A  | C5A  | C10A | C15A | 49.2(3)     |
| C6A  | C7A  | C8A  | C9A  | -0.7(2)     |
| C7A  | C8A  | C9A  | Cl2A | -178.74(16) |
| C7A  | C8A  | C9A  | N2A  | 0.6(2)      |
| C9A  | N2A  | C6A  | C5A  | -179.29(18) |
| C9A  | N2A  | C6A  | C7A  | -0.3(2)     |
| C9A  | N2A  | B1A  | F1A  | -60.8(3)    |
| C9A  | N2A  | B1A  | F2A  | 61.4(3)     |
| C9A  | N2A  | B1A  | N1A  | -179.66(18) |
| C10A | C5A  | C6A  | N2A  | -177.58(17) |
| C10A | C5A  | C6A  | C7A  | 3.7(3)      |
| C10A | C11A | C12A | C13A | -1.8(3)     |
| C11A | C10A | C15A | C14A | -0.4(3)     |
| C11A | C12A | C13A | C14A | -0.8(3)     |
| C11A | C12A | C13A | C16A | 176.79(18)  |
| C12A | C13A | C14A | C15A | 2.8(3)      |
| C12A | C13A | C16A | O1A  | 159.84(18)  |
| C12A | C13A | C16A | O2A  | -22.0(3)    |
| C13A | C14A | C15A | C10A | -2.2(3)     |
| C14A | C13A | C16A | O1A  | -22.6(3)    |
| C14A | C13A | C16A | O2A  | 155.58(19)  |
| C15A | C10A | C11A | C12A | 2.4(3)      |
| C16A | C13A | C14A | C15A | -174.77(18) |
| B1A  | N1A  | C1A  | Cl1A | 3.0(3)      |
| B1A  | N1A  | C1A  | C2A  | -176.72(19) |
| B1A  | N1A  | C4A  | C3A  | 176.42(18)  |
| B1A  | N1A  | C4A  | C5A  | 1.6(3)      |
| B1A  | N2A  | C6A  | C5A  | -1.2(3)     |
| B1A  | N2A  | C6A  | C7A  | 177.88(18)  |
| B1A  | N2A  | C9A  | Cl2A | 1.0(3)      |

| Atom | Atom | Atom | Atom | Angle/°     |
|------|------|------|------|-------------|
| B1A  | N2A  | C9A  | C8A  | -178.31(19) |

Table S20: Hydrogen Fractional Atomic Coordinates ( $\times 10^4$ ) and Equivalent Isotropic Displacement Parameters ( $\text{\AA}^2 \times 10^3$ ) for BODIPY 3.  $U_{eq}$  is defined as 1/3 of the trace of the orthogonalised  $U_{ij}$ .

| Atom | x        | y        | z        | $U_{eq}$ |
|------|----------|----------|----------|----------|
| H1   | 1858.45  | 12340.5  | -2071.86 | 42       |
| H2   | 3855.14  | 11401.53 | 4136.03  | 33       |
| H3   | 3269.49  | 10991.22 | 2672.23  | 28       |
| H7   | 1.67     | 7647.35  | 2951.57  | 24       |
| H8   | -1074.33 | 6168.65  | 4559.51  | 28       |
| H11  | 3701.23  | 8869.21  | 2000.98  | 23       |
| H12  | 4058.08  | 9647.31  | 219.56   | 23       |
| H14  | 263.02   | 11091.99 | 280.66   | 25       |
| H15  | -106.95  | 10230.74 | 2067.01  | 24       |
| H1A  | 5832.66  | 8221.63  | 2789.27  | 39       |
| H2A  | 9055.18  | 2995.43  | 9139.94  | 29       |
| H3A  | 7956.85  | 4070.49  | 7610.95  | 27       |
| H7A  | 2658.27  | 5189.65  | 7591.22  | 26       |
| H8A  | 899.73   | 4729.12  | 9117.16  | 30       |
| H11A | 6758.3   | 3425.95  | 6617.35  | 24       |
| H12A | 7276.43  | 4501.65  | 4873.11  | 23       |
| H14A | 4674.16  | 7657.83  | 5245.22  | 22       |
| H15A | 4237.06  | 6634.57  | 7008.98  | 23       |

Table S 21: Hydrogen Bond information for BODIPY 3.

| D   | H   | A                | d(D-H)/\AA | d(H-A)/\AA | d(D-A)/\AA | D-H-A/deg |
|-----|-----|------------------|------------|------------|------------|-----------|
| O1  | H1  | O2A <sup>1</sup> | 0.84       | 1.84       | 2.676(2)   | 175.7     |
| O1A | H1A | O2 <sup>1</sup>  | 0.84       | 1.75       | 2.589(2)   | 177.8     |

<sup>1</sup>1-x,2-y,-z

Submitted by: Jacques Pliquet

Solved by: Yoann Rousselin

Sample ID: 15JPL223

## Crystal Data and Experimental

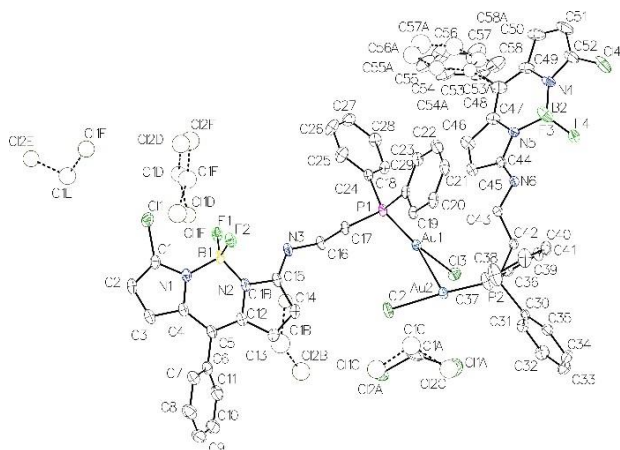

**Experimental.** Single clear light orange prism-shaped crystals of (**BODI-Au-7**) were recrystallised from a mixture of DCM and hexane by slow evaporation. A suitable crystal (0.39x0.25x0.18) mm<sup>3</sup> was selected and mounted on a MITIGEN holder oil on a Nonius Kappa Apex II diffractometer. The crystal was kept at  $T = 115(1)$  K during data collection. Using **Olex2** (Dolomanov et al., 2009), the structure was solved with the **SheIXT** (Sheldrick, 2015) structure solution program, using the Direct Methods solution method. The model was refined with version 2018/1 of **SheIXL** (Sheldrick, 2015) using Least Squares minimisation.

**Crystal Data.** C<sub>30</sub>H<sub>26</sub>AuBCl<sub>4</sub>F<sub>2</sub>N<sub>3</sub>P,  $M_r = 847.08$ , monoclinic, P2<sub>1</sub>/c (No. 14),  $a = 13.9927(4)$  Å,  $b = 29.9994(8)$  Å,  $c = 15.2788(5)$  Å,  $\beta = 95.500(2)^\circ$ ,  $\alpha = \gamma = 90^\circ$ ,  $V = 6384.1(3)$  Å<sup>3</sup>,  $T = 115(1)$  K,  $Z = 8$ ,  $Z' = 2$ ,  $\mu(\text{MoK}\alpha) = 5.031$ , 113257 reflections measured, 14774 unique ( $R_{int} = 0.0503$ ) which were used in all calculations. The final  $wR_2$  was 0.0542 (all data) and  $R_1$  was 0.0252 ( $I > 2(I)$ ).

Table S22: X-ray structure data of **BODI-AU-7**.

| Compound                     | <b>BODI-Au-7</b>                                                                   |
|------------------------------|------------------------------------------------------------------------------------|
| CCDC                         | <b>1825951</b>                                                                     |
| Formula                      | C <sub>30</sub> H <sub>26</sub> AuBCl <sub>4</sub> F <sub>2</sub> N <sub>3</sub> P |
| $D_{calc.}/\text{g cm}^{-3}$ | 1.763                                                                              |
| $\mu/\text{mm}^{-1}$         | 5.031                                                                              |
| Formula Weight               | 847.08                                                                             |
| Colour                       | clear light orange                                                                 |
| Shape                        | prism                                                                              |
| Size/mm <sup>3</sup>         | 0.39x0.25x0.18                                                                     |
| $T/\text{K}$                 | 115(1)                                                                             |
| Crystal System               | monoclinic                                                                         |
| Space Group                  | P2 <sub>1</sub> /c                                                                 |
| $a/\text{Å}$                 | 13.9927(4)                                                                         |
| $b/\text{Å}$                 | 29.9994(8)                                                                         |
| $c/\text{Å}$                 | 15.2788(5)                                                                         |
| $\alpha/^\circ$              | 90                                                                                 |
| $\beta/^\circ$               | 95.500(2)                                                                          |
| $\gamma/^\circ$              | 90                                                                                 |
| $V/\text{Å}^3$               | 6384.1(3)                                                                          |
| $Z$                          | 8                                                                                  |
| $Z'$                         | 2                                                                                  |
| Wavelength/Å                 | 0.71073                                                                            |
| Radiation type               | MoK $\alpha$                                                                       |
| $\theta_{min}/^\circ$        | 2.438                                                                              |
| $\theta_{max}/^\circ$        | 27.617                                                                             |
| Measured Refl.               | 113257                                                                             |
| Independent Refl.            | 14774                                                                              |
| Reflections Used             | 12297                                                                              |
| $R_{int}$                    | 0.0503                                                                             |
| Parameters                   | 774                                                                                |
| Restraints                   | 38                                                                                 |
| Largest Peak                 | 1.312                                                                              |
| Deepest Hole                 | -0.877                                                                             |
| GooF                         | 1.031                                                                              |
| $wR_2$ (all data)            | 0.0542                                                                             |
| $wR_2$                       | 0.0489                                                                             |
| $R_1$ (all data)             | 0.0396                                                                             |
| $R_1$                        | 0.0252                                                                             |

Table S 23: **BODI-AU-7** structure Quality Indicators.

|                     |            |       |            |      |                  |       |          |       |
|---------------------|------------|-------|------------|------|------------------|-------|----------|-------|
| <b>Reflections:</b> | d min (Mo) | 0.77  | $I/\sigma$ | 22.9 | R <sub>int</sub> | 5.03% | complete | 100%  |
| <b>Refinement:</b>  | Shift      | 0.005 | Max Peak   | 1.3  | Min Peak         | -0.9  | Goof     | 1.031 |

A clear light orange prism-shaped crystal with dimensions 0.39x0.25x0.18 mm<sup>3</sup> was mounted on a MITIGEN holder oil. X-ray diffraction data were collected using a Nonius Kappa Apex II diffractometer equipped with a Oxford Cryosystems low-temperature device, operating at  $T = 115(1)$  K. Data were measured using  $\phi$  and  $\omega$  scans of 0.6° per frame for 7s using MoK $\alpha$  radiation (X-ray tube, 50 kV, 32 mA). The total number of runs and images was based on the strategy calculation from the program APEX3 (Bruker, 2015). The maximum resolution achieved was  $\theta = 27.617^\circ$ . Cell parameters were retrieved using the **SAINT** (Bruker, V8.34A, after 2013) software and refined using **SAINT** (Bruker, V8.34A, after 2013) on 9812 reflections, 9 % of the observed reflections. Data reduction was performed using the **SAINT** (Bruker, V8.34A, after 2013) software which corrects for Lorentz polarisation. The final completeness is 99.90 % out to 27.617° in  $\theta$ . A multi-scan absorption correction was performed using SADABS-2014/5 (Bruker, 2014) was used for absorption correction.  $wR_2(\text{int})$  was 0.1361 before and 0.0534 after correction. The Ratio of minimum to maximum transmission is 0.6090. The  $\lambda/2$  correction factor is 0.00150. The absorption coefficient  $\mu$  of this material is 5.031 mm<sup>-1</sup> at this wavelength ( $\lambda = 0.71073\text{\AA}$ ) and the minimum and maximum transmissions are 0.4541 and 0.7456. The structure was solved in the space group P2<sub>1</sub>/c (# 14) by Direct Methods using the **ShelXT** (Sheldrick, 2015) structure solution program and refined by Least Squares using version 2018/1 of **ShelXL** (Sheldrick, 2015). All non-hydrogen atoms were refined anisotropically, excepted minor disordered part. Hydrogen atom positions were calculated geometrically and refined using the riding model. Two DCM molecules and one phenyl group from main complex were found disordered over three or two positions respectively. Some SHELXL restraints (RIGU) were employed to maintain a reasonable model. For DCM molecules some rigid groups were employed with AFIX 6. For more detail, see res file include in cif file. SADABS-2014/5 (Bruker,2014) was used for absorption correction.  $wR_2(\text{int})$  was 0.1361 before and 0.0534 after correction. The Ratio of minimum to maximum transmission is 0.6090. The  $\lambda/2$  correction factor is 0.00150. The value of Z' is 2. This means that there are two independent molecules in the asymmetric unit.

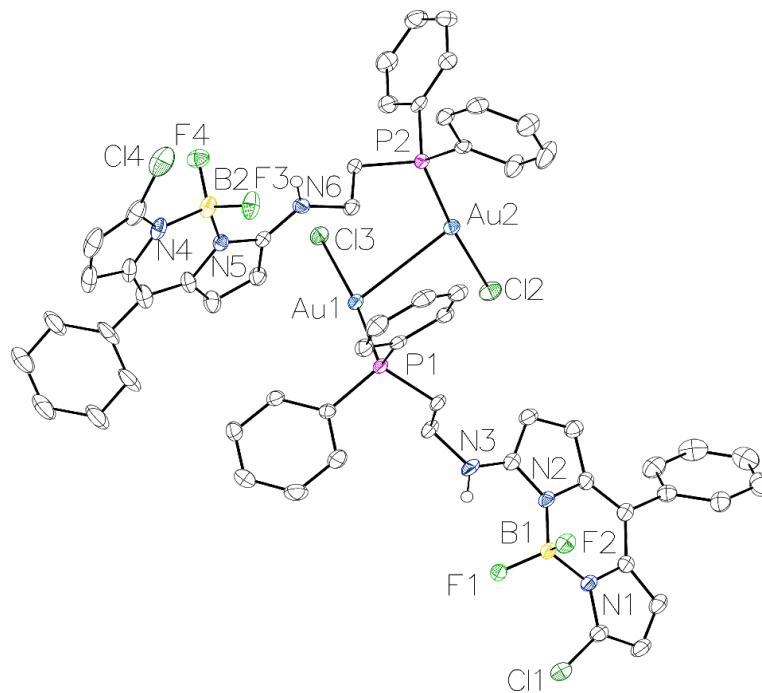

Figure S 129: ORTEP view of **BODI-Au-7**. Thermal ellipsoids are drawn at 50% probability. H-atoms on carbon atoms, disordered phenyl group and solvent are omitted for clarity.

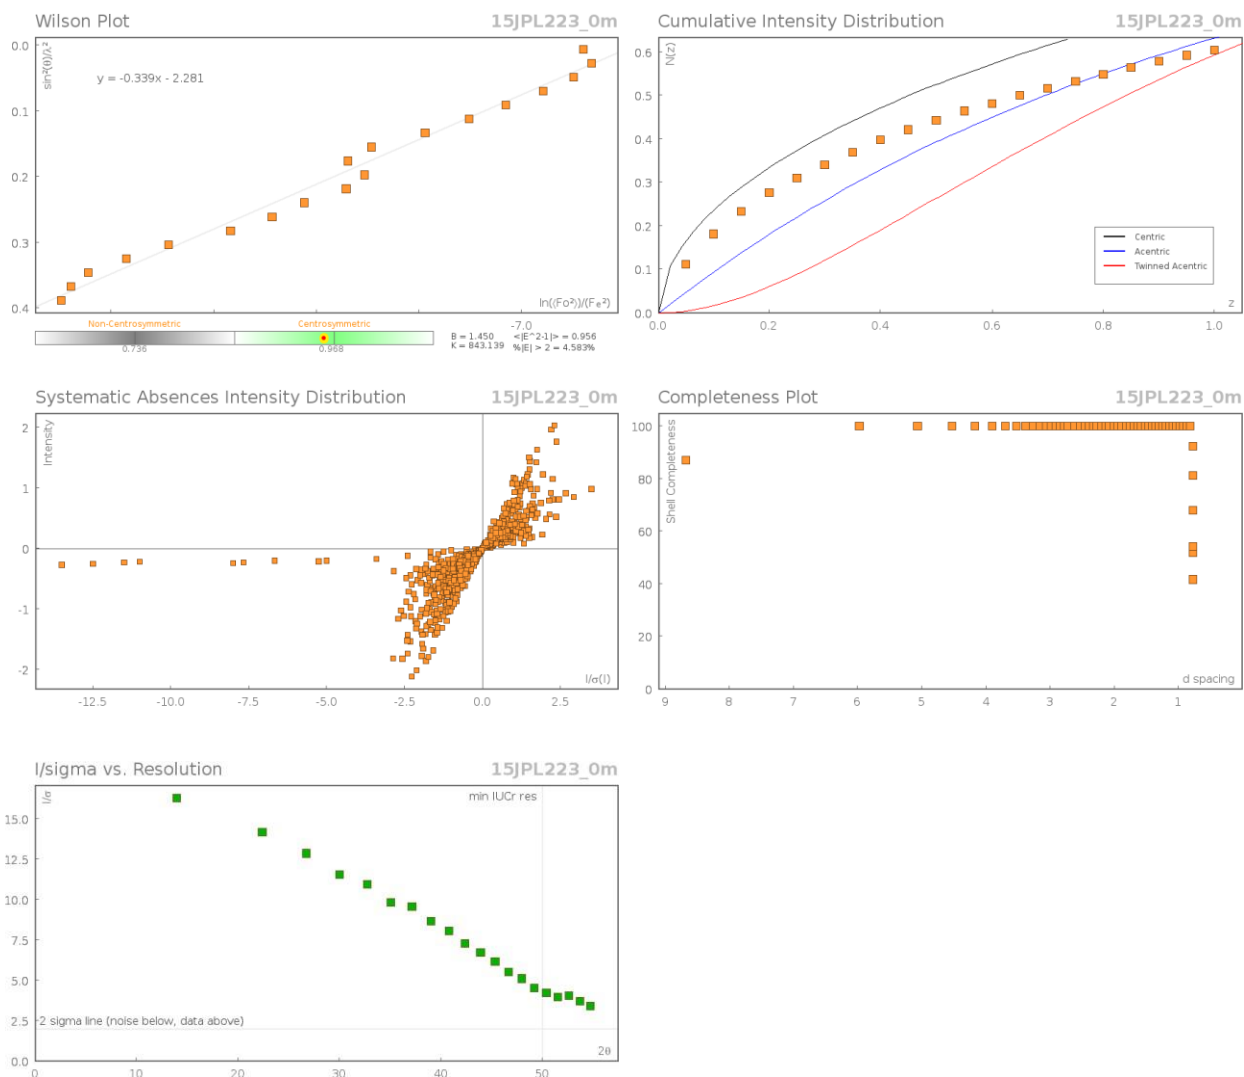

Figure S 130: Data Plots: Diffraction Data of **BODI-Au-7** structure.

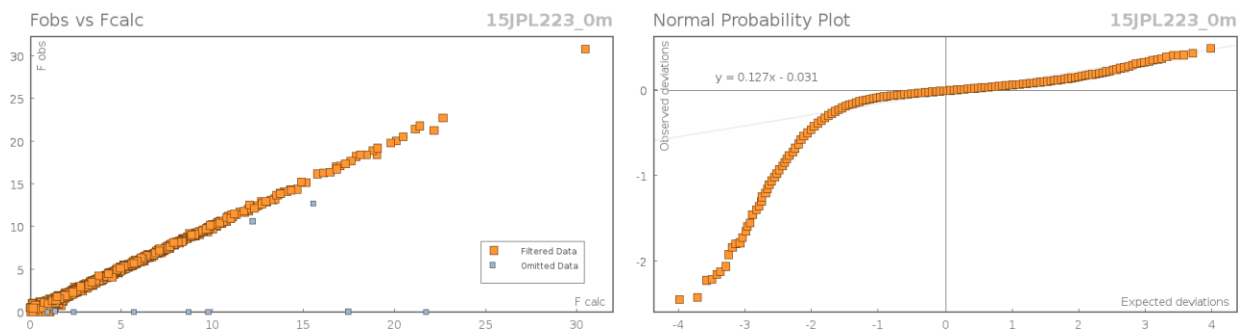

Figure S 131: Data Plots: refinement and Data of **BODI-Au-7** structure.

Table S 24: reflection statistics of **BODI-Au-7** structure.

|                                     |                                        |                            |                 |
|-------------------------------------|----------------------------------------|----------------------------|-----------------|
| Total reflections (after filtering) | 114708                                 | Unique reflections         | 14774           |
| Completeness                        | 0.996                                  | Mean $I/\sigma$            | 22.91           |
| $hkl_{\max}$ collected              | (18, 39, 19)                           | $hkl_{\min}$ collected     | (-18, -38, -18) |
| $hkl_{\max}$ used                   | (18, 39, 19)                           | $hkl_{\min}$ used          | (-18, 0, 0)     |
| Lim $d_{\max}$ collected            | 100.0                                  | Lim $d_{\min}$ collected   | 0.36            |
| $d_{\max}$ used                     | 15.21                                  | $d_{\min}$ used            | 0.77            |
| Friedel pairs                       | 24662                                  | Friedel pairs merged       | 1               |
| Inconsistent equivalents            | 0                                      | $R_{\text{int}}$           | 0.0503          |
| $R_{\text{sigma}}$                  | 0.0323                                 | Intensity transformed      | 0               |
| Omitted reflections                 | 0                                      | Omitted by user (OMIT hkl) | 103             |
| Multiplicity                        | (19232, 17510, 10918, 5008, 1372, 135) | Maximum multiplicity       | 19              |
| Removed systematic absences         | 1348                                   | Filtered off (Shel/OMIT)   | 0               |

Table S 25: Fractional Atomic Coordinates ( $\times 10^4$ ) and Equivalent Isotropic Displacement Parameters ( $\text{\AA}^2 \times 10^3$ ) for **BODI-Au-7**.  $U_{eq}$  is defined as 1/3 of the trace of the orthogonalised  $U_j$ .

| Atom | x          | y         | z          | $U_{eq}$  |
|------|------------|-----------|------------|-----------|
| Au1  | 5318.7(2)  | 7043.3(2) | 2545.8(2)  | 16.41(3)  |
| Au2  | 6839.6(2)  | 7623.6(2) | 3680.5(2)  | 18.48(3)  |
| Cl1  | 3519.7(7)  | 4493.2(3) | 7380.4(6)  | 29.94(19) |
| Cl2  | 7079.7(7)  | 6942.9(3) | 4362.0(6)  | 34.1(2)   |
| Cl3  | 6270.9(6)  | 7213.1(3) | 1448.9(5)  | 24.13(17) |
| Cl4  | 1087.5(8)  | 9766.2(3) | 452.2(7)   | 44.6(3)   |
| P1   | 4221.9(6)  | 6914.0(3) | 3484.8(5)  | 16.59(16) |
| P2   | 6720.8(6)  | 8309.6(3) | 3111.1(5)  | 15.51(16) |
| F1   | 4196.7(14) | 5056.8(6) | 5869.6(12) | 23.9(4)   |
| F2   | 4471.7(14) | 5554.1(6) | 6985.8(12) | 24.7(4)   |
| F3   | 2258.1(16) | 9108.9(7) | 1695.6(12) | 33.1(5)   |
| F4   | 2947.4(14) | 9104.9(6) | 409.3(13)  | 27.8(4)   |



| Atom | x          | y          | z          | $U_{eq}$ |
|------|------------|------------|------------|----------|
| N1   | 5251(2)    | 4839.4(8)  | 7153.1(16) | 19.1(6)  |
| N2   | 5755(2)    | 5391.0(8)  | 6098.3(17) | 18.9(6)  |
| N3   | 4933(2)    | 5807.1(9)  | 4971.5(17) | 21.7(6)  |
| N4   | 1291(2)    | 8884.8(10) | 373.8(17)  | 23.7(6)  |
| N5   | 2571.5(18) | 8405.4(8)  | 1046.7(16) | 17.3(5)  |
| N6   | 3991.4(19) | 8525.8(9)  | 1964.6(17) | 19.4(6)  |
| C1   | 4744(3)    | 4535.6(10) | 7581(2)    | 22.4(7)  |
| C2   | 5338(3)    | 4277.7(11) | 8140(2)    | 27.6(8)  |
| C3   | 6267(3)    | 4430.0(11) | 8065(2)    | 25.0(7)  |
| C4   | 6210(2)    | 4777.3(10) | 7455(2)    | 19.6(7)  |
| C5   | 6952(2)    | 5034.8(10) | 7111(2)    | 19.5(7)  |
| C6   | 7958(3)    | 4969.2(10) | 7481(2)    | 23.7(7)  |
| C7   | 8203(3)    | 4990.9(11) | 8388(2)    | 27.7(8)  |
| C8   | 9146(3)    | 4927.9(13) | 8736(3)    | 35.5(9)  |
| C9   | 9852(3)    | 4842.8(13) | 8186(3)    | 39.8(10) |
| C10  | 9620(3)    | 4821.4(12) | 7292(3)    | 38(1)    |
| C11  | 8680(3)    | 4881.8(12) | 6940(3)    | 31.6(8)  |
| C12  | 6717(2)    | 5331.1(10) | 6442(2)    | 20.8(7)  |
| C13  | 7290(3)    | 5616.6(11) | 5949(2)    | 23.3(7)  |
| C14  | 6708(3)    | 5827.4(11) | 5322(2)    | 23.5(7)  |
| C15  | 5744(3)    | 5682.7(10) | 5426(2)    | 20.2(7)  |
| C16  | 4873(3)    | 6102.7(10) | 4208(2)    | 21.1(7)  |
| C17  | 4578(3)    | 6574.5(10) | 4447.1(19) | 19.9(7)  |
| C18  | 3843(2)    | 7437.7(10) | 3942(2)    | 18.6(7)  |
| C19  | 4482(3)    | 7664.1(10) | 4542(2)    | 21.4(7)  |
| C20  | 4243(3)    | 8081.9(11) | 4852(2)    | 26.1(8)  |
| C21  | 3369(3)    | 8271.9(11) | 4560(2)    | 28.5(8)  |
| C22  | 2733(3)    | 8049.3(12) | 3966(2)    | 30.5(8)  |
| C23  | 2966(3)    | 7631.7(11) | 3654(2)    | 24.1(7)  |
| C24  | 3147(2)    | 6656.8(10) | 2953(2)    | 18.0(6)  |
| C25  | 2469(3)    | 6459.2(12) | 3439(2)    | 31.1(8)  |
| C26  | 1644(3)    | 6275.7(13) | 3018(2)    | 34.2(9)  |
| C27  | 1474(3)    | 6293.3(11) | 2123(2)    | 27.2(8)  |
| C28  | 2141(3)    | 6484.3(11) | 1628(2)    | 26.2(8)  |
| C29  | 2978(2)    | 6660.9(10) | 2042(2)    | 21.6(7)  |
| C30  | 7789(2)    | 8468.4(10) | 2602(2)    | 17.9(6)  |

| Atom | x       | y          | z          | $U_{eq}$ |
|------|---------|------------|------------|----------|
| C31  | 8069(3) | 8203.4(11) | 1919(2)    | 24.8(7)  |
| C32  | 8897(3) | 8306.9(12) | 1538(2)    | 30.1(8)  |
| C33  | 9450(3) | 8669.4(12) | 1835(2)    | 30.7(8)  |
| C34  | 9171(3) | 8934.5(12) | 2502(2)    | 27.2(8)  |
| C35  | 8338(2) | 8835.5(11) | 2884(2)    | 21.2(7)  |
| C36  | 6557(2) | 8731(1)    | 3933(2)    | 17.2(6)  |
| C37  | 6771(3) | 8629.9(12) | 4814(2)    | 32.6(9)  |
| C38  | 6655(4) | 8949.5(13) | 5446(2)    | 46.1(12) |
| C39  | 6321(3) | 9369.9(12) | 5208(2)    | 36.4(9)  |
| C40  | 6106(3) | 9473.2(11) | 4337(2)    | 25.2(7)  |
| C41  | 6218(2) | 9155.7(10) | 3703(2)    | 22.4(7)  |
| C42  | 5750(2) | 8405.6(10) | 2243.1(19) | 17.4(6)  |
| C43  | 4768(2) | 8369.5(11) | 2596(2)    | 20.1(7)  |
| C44  | 3378(2) | 8257.4(10) | 1518.4(19) | 17.9(6)  |
| C45  | 3435(2) | 7781.1(11) | 1432(2)    | 22.4(7)  |
| C46  | 2645(3) | 7651.9(12) | 912(2)     | 26.8(8)  |
| C47  | 2079(2) | 8035.0(11) | 674(2)     | 23.0(7)  |
| C48  | 1210(3) | 8079.6(13) | 197(2)     | 29.6(8)  |
| C49  | 793(2)  | 8508.0(13) | 54(2)      | 28.0(8)  |
| C50  | -99(3)  | 8643.1(16) | -340(2)    | 38.4(10) |
| C51  | -150(3) | 9103.1(16) | -271(2)    | 41.7(11) |
| C52  | 708(3)  | 9239.7(13) | 165(2)     | 33.0(9)  |
| C53  | 749(3)  | 7712.6(13) | -260(3)    | 35.8(13) |
| C58  | 498(4)  | 7712.0(14) | -1163(3)   | 46.3(16) |
| C57  | 89(4)   | 7334.3(17) | -1571(2)   | 59(2)    |
| C56  | -70(4)  | 6957.3(14) | -1076(3)   | 56(2)    |
| C55  | 180(4)  | 6957.8(13) | -174(3)    | 48.2(17) |
| C54  | 590(3)  | 7335.5(15) | 234(2)     | 38.9(14) |
| C53A | 584(6)  | 7635(2)    | -17(4)     | 31(3)    |
| C58A | 286(6)  | 7548(2)    | -895(4)    | 39(3)    |
| C57A | -207(6) | 7157(3)    | -1127(4)   | 53(4)    |
| C56A | -401(6) | 6853(2)    | -482(6)    | 63(4)    |
| C55A | -103(6) | 6939(2)    | 395(5)     | 51(3)    |
| C54A | 389(6)  | 7330(2)    | 628(4)     | 35(3)    |
| B1   | 4873(3) | 5209.4(11) | 6512(2)    | 19.0(8)  |
| B2   | 2279(3) | 8897.3(13) | 895(2)     | 21.3(8)  |

| Atom | x          | y          | z          | $U_{eq}$ |
|------|------------|------------|------------|----------|
| Cl1D | 3648.6(19) | 5557.5(11) | 8950(2)    | 39.3(9)  |
| Cl2D | 1634.2(19) | 5736.1(13) | 9214(3)    | 51.2(9)  |
| C1D  | 2437(2)    | 5441(3)    | 8610(5)    | 38(3)    |
| Cl1F | 3569(3)    | 5527.4(17) | 9393(4)    | 54.4(9)  |
| Cl2F | 1574(3)    | 5784.0(18) | 8863(4)    | 54.4(9)  |
| C1F  | 2627(7)    | 5536(9)    | 8543(6)    | 54.4(9)  |
| Cl1A | 8893.8(18) | 6957.6(7)  | 1583(2)    | 59.9(7)  |
| Cl2A | 8752(2)    | 6096.2(6)  | 2469.8(18) | 35.9(6)  |
| C1A  | 8370(6)    | 6655.2(11) | 2401(5)    | 45(2)    |
| Cl1C | 8611(11)   | 6116(3)    | 2677(9)    | 54.4(9)  |
| Cl2C | 8932(6)    | 7036(3)    | 2126(8)    | 54.4(9)  |
| C1C  | 8106(11)   | 6647(5)    | 2480(30)   | 54.4(9)  |
| Cl1E | 1259(4)    | 3923.4(11) | 7838(3)    | 44.0(16) |
| Cl2E | 1251(3)    | 2964.9(10) | 7457(3)    | 42.8(9)  |
| C1E  | 1912(6)    | 3464.5(19) | 7492(15)   | 47(5)    |
| Cl1B | 6182(3)    | 4447.6(15) | 853(4)     | 31.1(11) |
| Cl2B | 8217(3)    | 4385.0(17) | 553(3)     | 51.1(12) |
| C1B  | 7369(3)    | 4382(8)    | 1332(3)    | 60(5)    |

Table S26: Anisotropic Displacement Parameters ( $\times 10^4$ ) **BODI-Au-7**. The anisotropic displacement factor exponent takes the form:  $-2\pi^2[h^2a^{*2} \times U_{11} + \dots + 2hka^* \times b^* \times U_{12}]$

| Atom | $U_{11}$ | $U_{22}$ | $U_{33}$ | $U_{23}$ | $U_{13}$ | $U_{12}$ |
|------|----------|----------|----------|----------|----------|----------|
| Au1  | 20.80(6) | 14.74(6) | 13.65(6) | 1.09(4)  | 1.54(4)  | 1.22(5)  |
| Au2  | 22.54(7) | 14.36(6) | 18.08(6) | 2.72(4)  | -0.44(5) | 0.22(5)  |
| Cl1  | 33.0(5)  | 31.7(5)  | 25.7(4)  | 5.8(3)   | 5.9(4)   | -4.2(4)  |
| Cl2  | 45.4(6)  | 18.5(4)  | 36.7(5)  | 10.7(3)  | -5.3(4)  | 0.6(4)   |
| Cl3  | 25.4(4)  | 30.1(4)  | 17.6(4)  | -0.8(3)  | 6.2(3)   | -1.2(4)  |
| Cl4  | 53.5(7)  | 38.9(5)  | 41.0(6)  | 10.1(4)  | 2.3(5)   | 25.6(5)  |
| P1   | 23.7(4)  | 13.2(4)  | 12.8(4)  | 1.7(3)   | 1.4(3)   | -0.2(3)  |
| P2   | 16.1(4)  | 15.8(4)  | 14.4(4)  | 1.6(3)   | 0.8(3)   | 0.2(3)   |
| F1   | 32.8(11) | 20.1(9)  | 18.0(9)  | 1.7(7)   | -2.0(8)  | -5.0(8)  |
| F2   | 36.5(12) | 16.2(9)  | 21.9(10) | -2.0(7)  | 5.3(8)   | 5.3(8)   |
| F3   | 45.4(13) | 31.7(11) | 20.9(10) | -5.7(8)  | -3.9(9)  | 18.1(10) |
| F4   | 27.8(11) | 22.7(10) | 33.0(11) | 6.2(8)   | 3.6(9)   | 2.7(9)   |
| N1   | 28.7(16) | 13.9(12) | 14.8(13) | -0.3(10) | 3.7(11)  | -0.1(12) |
| N2   | 28.3(16) | 12.9(12) | 15.4(13) | 1.7(10)  | 1.0(11)  | 0.9(11)  |

| Atom | $U_{11}$ | $U_{22}$ | $U_{33}$ | $U_{23}$ | $U_{13}$ | $U_{12}$  |
|------|----------|----------|----------|----------|----------|-----------|
| N3   | 30.0(16) | 17.5(13) | 17.9(14) | 6.7(11)  | 3.9(12)  | 2.9(12)   |
| N4   | 20.4(15) | 35.0(16) | 15.5(13) | 4.4(12)  | 1.6(11)  | 10.3(13)  |
| N5   | 15.9(14) | 19.8(13) | 16.1(13) | 1.4(10)  | 1.3(10)  | 2.6(11)   |
| N6   | 17.9(14) | 16.2(13) | 23.3(14) | 4.7(11)  | -2.0(11) | -0.7(11)  |
| C1   | 31.3(19) | 18.2(16) | 18.4(16) | 0.1(12)  | 5.6(14)  | -1.0(14)  |
| C2   | 42(2)    | 20.4(17) | 21.3(17) | 6.1(13)  | 4.9(16)  | -0.5(16)  |
| C3   | 36(2)    | 19.5(16) | 19.7(17) | 3.3(13)  | 1.3(15)  | 4.9(15)   |
| C4   | 29.4(19) | 12.8(14) | 16.6(15) | -3.5(12) | 1.4(13)  | 1.4(13)   |
| C5   | 28.8(19) | 13.4(14) | 16.3(15) | -2.5(12) | 2.0(13)  | 3.5(13)   |
| C6   | 28.8(19) | 15.5(15) | 26.6(18) | 1.5(13)  | 1.0(15)  | 1.0(14)   |
| C7   | 32(2)    | 22.0(17) | 28.2(19) | 0.7(14)  | -0.2(15) | 3.8(15)   |
| C8   | 36(2)    | 33(2)    | 35(2)    | 0.0(16)  | -8.9(17) | 2.6(18)   |
| C9   | 30(2)    | 28(2)    | 60(3)    | 3.0(19)  | -3(2)    | 4.8(17)   |
| C10  | 35(2)    | 27(2)    | 54(3)    | 3.3(18)  | 15(2)    | 8.6(17)   |
| C11  | 39(2)    | 24.3(18) | 32(2)    | 3.6(15)  | 6.3(17)  | 6.6(17)   |
| C12  | 29.2(19) | 16.5(15) | 16.3(15) | -3.1(12) | 0.7(13)  | 0.5(14)   |
| C13  | 28.3(19) | 21.2(16) | 20.8(17) | -0.4(13) | 5.2(14)  | -0.3(14)  |
| C14  | 34(2)    | 18.5(16) | 19.0(16) | 1.1(13)  | 5.0(14)  | -2.9(15)  |
| C15  | 34(2)    | 10.8(14) | 15.9(15) | -1.9(11) | 3.0(14)  | 3.3(14)   |
| C16  | 32.8(19) | 16.7(15) | 14.3(15) | 3.3(12)  | 4.3(13)  | 4.7(14)   |
| C17  | 30.8(19) | 16.7(15) | 12.4(15) | 2.9(12)  | 2.4(13)  | -0.5(14)  |
| C18  | 28.4(18) | 13.7(14) | 14.7(15) | 2.7(11)  | 6.6(13)  | -1.4(13)  |
| C19  | 26.8(18) | 19.8(16) | 18.0(16) | 3.7(12)  | 4.6(13)  | -1.3(14)  |
| C20  | 42(2)    | 17.7(16) | 19.8(17) | -1.4(13) | 8.4(15)  | -3.7(15)  |
| C21  | 45(2)    | 15.2(16) | 27.6(19) | 1.6(14)  | 14.8(17) | 3.4(16)   |
| C22  | 37(2)    | 26.3(18) | 29.3(19) | 5.3(15)  | 7.3(16)  | 9.1(16)   |
| C23  | 29.7(19) | 20.9(16) | 21.7(17) | 1.2(13)  | 1.8(14)  | -0.3(15)  |
| C24  | 22.5(17) | 13.0(14) | 18.4(15) | 1.1(12)  | 1.1(13)  | -0.5(13)  |
| C25  | 39(2)    | 37(2)    | 18.2(17) | -0.1(15) | 7.8(15)  | -9.4(18)  |
| C26  | 37(2)    | 37(2)    | 31(2)    | -1.6(16) | 13.6(17) | -14.7(18) |
| C27  | 24.2(19) | 23.6(17) | 34(2)    | -5.5(15) | 1.3(15)  | -4.3(15)  |
| C28  | 32(2)    | 24.9(17) | 20.2(17) | -2.8(13) | -3.4(14) | -3.6(15)  |
| C29  | 28.2(19) | 17.9(16) | 19.0(16) | 2.1(12)  | 3.4(14)  | -3.4(14)  |
| C30  | 20.3(17) | 18.4(15) | 15.3(15) | 6.5(12)  | 3.0(12)  | 4.9(13)   |
| C31  | 26.9(19) | 23.8(17) | 24.0(17) | 1.2(14)  | 4.0(14)  | -1.7(15)  |
| C32  | 35(2)    | 33(2)    | 24.3(18) | -2.1(15) | 10.4(16) | 2.3(17)   |

| Atom | $U_{11}$ | $U_{22}$ | $U_{33}$ | $U_{23}$  | $U_{13}$ | $U_{12}$  |
|------|----------|----------|----------|-----------|----------|-----------|
| C33  | 24.9(19) | 38(2)    | 31(2)    | 7.0(16)   | 10.0(16) | -1.5(16)  |
| C34  | 24.8(19) | 26.4(18) | 30.7(19) | 4.3(15)   | 4.0(15)  | -7.0(15)  |
| C35  | 22.1(17) | 19.8(16) | 21.9(17) | 1.3(13)   | 3.6(13)  | 2.9(14)   |
| C36  | 16.3(16) | 19.6(15) | 16.6(15) | 0.4(12)   | 6.2(12)  | -1.8(13)  |
| C37  | 55(3)    | 21.8(17) | 20.9(18) | 1.6(14)   | 0.4(17)  | 7.1(17)   |
| C38  | 89(4)    | 32(2)    | 17.2(18) | 0.3(15)   | 3(2)     | 8(2)      |
| C39  | 59(3)    | 26.3(19) | 24.9(19) | -5.9(15)  | 11.6(18) | -0.1(19)  |
| C40  | 32(2)    | 15.3(16) | 29.0(19) | 1.1(13)   | 8.5(15)  | 1.2(14)   |
| C41  | 28.8(19) | 18.6(16) | 19.9(16) | 3.4(13)   | 3.4(14)  | 1.0(14)   |
| C42  | 18.9(16) | 17.8(15) | 14.9(15) | 3.2(12)   | -1.0(12) | -1.4(13)  |
| C43  | 18.5(17) | 22.1(16) | 19.2(16) | 5.8(13)   | -0.2(13) | 0.6(13)   |
| C44  | 20.6(17) | 18.4(15) | 14.6(15) | 2.8(12)   | 1.5(12)  | 1.0(13)   |
| C45  | 27.4(19) | 19.0(16) | 20.2(16) | 0.8(13)   | -0.8(14) | 2.6(14)   |
| C46  | 32(2)    | 25.1(18) | 22.2(17) | -6.7(14)  | -2.3(15) | 4.0(16)   |
| C47  | 22.4(18) | 28.0(18) | 17.8(16) | -7.1(13)  | -1.7(13) | 1.0(14)   |
| C48  | 26(2)    | 40(2)    | 22.3(18) | -8.2(15)  | -2.7(15) | 1.5(16)   |
| C49  | 19.9(18) | 50(2)    | 14.1(16) | -1.0(15)  | -1.1(13) | 4.7(17)   |
| C50  | 23(2)    | 72(3)    | 19.4(18) | 4.1(18)   | -3.4(15) | 8(2)      |
| C51  | 32(2)    | 65(3)    | 27(2)    | 14.2(19)  | -0.2(17) | 23(2)     |
| C52  | 31(2)    | 45(2)    | 23.4(18) | 9.9(16)   | 4.8(16)  | 17.8(18)  |
| C53  | 15(3)    | 53.5(19) | 38.6(18) | -20.0(14) | 1.2(16)  | -13.7(17) |
| C58  | 40(4)    | 58(2)    | 39.3(18) | -19.1(15) | -3.2(17) | -23(2)    |
| C57  | 70(5)    | 63(2)    | 43.1(19) | -18.9(14) | -8.2(16) | -34(3)    |
| C56  | 61(5)    | 61(2)    | 44.1(19) | -19.7(14) | -6.8(19) | -32(2)    |
| C55  | 42(4)    | 57.4(19) | 43.5(19) | -19.9(15) | -3.3(18) | -24.1(19) |
| C54  | 22(3)    | 54(2)    | 39.6(19) | -19.7(13) | 0.2(15)  | -16.7(18) |
| B1   | 30(2)    | 13.2(16) | 13.9(17) | -0.1(13)  | 1.7(15)  | -0.5(15)  |
| B2   | 22(2)    | 25.4(19) | 17.0(17) | 1.2(14)   | 1.8(15)  | 10.1(16)  |
| Cl1A | 55.1(15) | 62.3(15) | 65.8(18) | 6.5(12)   | 24.1(12) | 2.7(11)   |
| Cl2A | 33.5(14) | 46.6(12) | 27.2(17) | -0.3(10)  | 0.9(11)  | 13.1(8)   |
| C1A  | 33(5)    | 53(5)    | 50(5)    | 6(4)      | 13(4)    | 24(5)     |

Table S 27: Bond Lengths in Å for *BODI-Au-7*.

| Atom | Atom | Length/Å    | Atom | Atom | Length/Å  |
|------|------|-------------|------|------|-----------|
| Au1  | Au2  | 3.13975(19) | Au1  | Cl3  | 2.2961(8) |

| Atom | Atom | Length/Å  | Atom | Atom | Length/Å |
|------|------|-----------|------|------|----------|
| Au1  | P1   | 2.2330(8) | C5   | C12  | 1.371(4) |
| Au2  | Cl2  | 2.3021(8) | C6   | C7   | 1.397(5) |
| Au2  | P2   | 2.2344(8) | C6   | C11  | 1.389(5) |
| Cl1  | C1   | 1.716(4)  | C7   | C8   | 1.387(5) |
| Cl4  | C52  | 1.710(4)  | C8   | C9   | 1.381(6) |
| P1   | C17  | 1.818(3)  | C9   | C10  | 1.376(6) |
| P1   | C18  | 1.819(3)  | C10  | C11  | 1.384(6) |
| P1   | C24  | 1.813(3)  | C12  | C13  | 1.436(5) |
| P2   | C30  | 1.813(3)  | C13  | C14  | 1.353(5) |
| P2   | C36  | 1.812(3)  | C14  | C15  | 1.441(5) |
| P2   | C42  | 1.828(3)  | C16  | C17  | 1.528(4) |
| F1   | B1   | 1.374(4)  | C18  | C19  | 1.393(5) |
| F2   | B1   | 1.410(4)  | C18  | C23  | 1.392(5) |
| F3   | B2   | 1.380(4)  | C19  | C20  | 1.392(4) |
| F4   | B2   | 1.396(4)  | C20  | C21  | 1.383(5) |
| N1   | C1   | 1.360(4)  | C21  | C22  | 1.381(5) |
| N1   | C4   | 1.389(4)  | C22  | C23  | 1.390(5) |
| N1   | B1   | 1.540(4)  | C24  | C25  | 1.392(5) |
| N2   | C12  | 1.408(4)  | C24  | C29  | 1.389(4) |
| N2   | C15  | 1.348(4)  | C25  | C26  | 1.380(5) |
| N2   | B1   | 1.539(5)  | C26  | C27  | 1.367(5) |
| N3   | C15  | 1.325(4)  | C27  | C28  | 1.381(5) |
| N3   | C16  | 1.461(4)  | C28  | C29  | 1.383(5) |
| N4   | C49  | 1.392(5)  | C30  | C31  | 1.397(4) |
| N4   | C52  | 1.361(4)  | C30  | C35  | 1.388(5) |
| N4   | B2   | 1.528(5)  | C31  | C32  | 1.381(5) |
| N5   | C44  | 1.354(4)  | C32  | C33  | 1.385(5) |
| N5   | C47  | 1.400(4)  | C33  | C34  | 1.379(5) |
| N5   | B2   | 1.543(4)  | C34  | C35  | 1.384(5) |
| N6   | C43  | 1.460(4)  | C36  | C37  | 1.384(4) |
| N6   | C44  | 1.318(4)  | C36  | C41  | 1.393(4) |
| C1   | C2   | 1.372(5)  | C37  | C38  | 1.381(5) |
| C2   | C3   | 1.393(5)  | C38  | C39  | 1.382(5) |
| C3   | C4   | 1.395(4)  | C39  | C40  | 1.371(5) |
| C4   | C5   | 1.433(5)  | C40  | C41  | 1.379(4) |
| C5   | C6   | 1.479(5)  | C42  | C43  | 1.527(4) |

| Atom | Atom | Length/Å | Atom | Atom | Length/Å |
|------|------|----------|------|------|----------|
| C44  | C45  | 1.438(4) | C53A | C54A | 1.3900   |
| C45  | C46  | 1.355(5) | C58A | C57A | 1.3900   |
| C46  | C47  | 1.423(5) | C57A | C56A | 1.3900   |
| C47  | C48  | 1.363(5) | C56A | C55A | 1.3900   |
| C48  | C49  | 1.419(5) | C55A | C54A | 1.3900   |
| C48  | C53  | 1.425(4) | Cl1D | C1D  | 1.7598   |
| C48  | C53A | 1.612(6) | Cl2D | C1D  | 1.7604   |
| C49  | C50  | 1.393(5) | Cl1F | C1F  | 1.7598   |
| C50  | C51  | 1.386(6) | Cl2F | C1F  | 1.7599   |
| C51  | C52  | 1.378(6) | Cl1A | C1A  | 1.7599   |
| C53  | C58  | 1.3900   | Cl2A | C1A  | 1.7601   |
| C53  | C54  | 1.3900   | Cl1C | C1C  | 1.7578   |
| C58  | C57  | 1.3900   | Cl2C | C1C  | 1.7606   |
| C57  | C56  | 1.3900   | Cl1E | C1E  | 1.7614   |
| C56  | C55  | 1.3900   | Cl2E | C1E  | 1.7596   |
| C55  | C54  | 1.3900   | Cl1B | C1B  | 1.7608   |
| C53A | C58A | 1.3900   | Cl2B | C1B  | 1.7595   |

Table S 28: Bond Angles in ° for **BODI-Au-7**.

| Atom | Atom | Atom | Angle/°    | Atom | Atom | Atom | Angle/°    |
|------|------|------|------------|------|------|------|------------|
| Cl3  | Au1  | Au2  | 82.53(2)   | C30  | P2   | C42  | 103.48(14) |
| P1   | Au1  | Au2  | 102.29(2)  | C36  | P2   | Au2  | 112.47(10) |
| P1   | Au1  | Cl3  | 171.97(3)  | C36  | P2   | C30  | 106.17(14) |
| Cl2  | Au2  | Au1  | 79.62(2)   | C36  | P2   | C42  | 104.96(15) |
| P2   | Au2  | Au1  | 105.93(2)  | C42  | P2   | Au2  | 116.74(10) |
| P2   | Au2  | Cl2  | 174.45(3)  | C1   | N1   | C4   | 106.4(3)   |
| C17  | P1   | Au1  | 117.70(12) | C1   | N1   | B1   | 128.7(3)   |
| C17  | P1   | C18  | 103.91(14) | C4   | N1   | B1   | 124.7(3)   |
| C18  | P1   | Au1  | 109.88(10) | C12  | N2   | B1   | 125.2(3)   |
| C24  | P1   | Au1  | 112.21(10) | C15  | N2   | C12  | 108.0(3)   |
| C24  | P1   | C17  | 106.00(15) | C15  | N2   | B1   | 126.2(3)   |
| C24  | P1   | C18  | 106.27(15) | C15  | N3   | C16  | 124.8(3)   |
| C30  | P2   | Au2  | 112.06(10) | C49  | N4   | B2   | 126.9(3)   |

| Atom | Atom | Atom | Angle/°  | Atom | Atom | Atom | Angle/°  |
|------|------|------|----------|------|------|------|----------|
| C52  | N4   | C49  | 106.5(3) | C19  | C18  | P1   | 118.8(3) |
| C52  | N4   | B2   | 126.5(3) | C23  | C18  | P1   | 121.3(2) |
| C44  | N5   | C47  | 108.0(3) | C23  | C18  | C19  | 119.6(3) |
| C44  | N5   | B2   | 126.1(3) | C20  | C19  | C18  | 120.2(3) |
| C47  | N5   | B2   | 125.8(3) | C21  | C20  | C19  | 119.7(3) |
| C44  | N6   | C43  | 123.5(3) | C22  | C21  | C20  | 120.4(3) |
| N1   | C1   | Cl1  | 121.4(2) | C21  | C22  | C23  | 120.2(3) |
| N1   | C1   | C2   | 111.4(3) | C22  | C23  | C18  | 119.8(3) |
| C2   | C1   | Cl1  | 127.2(3) | C25  | C24  | P1   | 121.4(2) |
| C1   | C2   | C3   | 106.1(3) | C29  | C24  | P1   | 119.9(2) |
| C2   | C3   | C4   | 107.8(3) | C29  | C24  | C25  | 118.7(3) |
| N1   | C4   | C3   | 108.2(3) | C26  | C25  | C24  | 120.1(3) |
| N1   | C4   | C5   | 121.1(3) | C27  | C26  | C25  | 120.6(3) |
| C3   | C4   | C5   | 130.5(3) | C26  | C27  | C28  | 120.1(3) |
| C4   | C5   | C6   | 119.0(3) | C27  | C28  | C29  | 119.8(3) |
| C12  | C5   | C4   | 119.5(3) | C28  | C29  | C24  | 120.6(3) |
| C12  | C5   | C6   | 121.5(3) | C31  | C30  | P2   | 118.2(3) |
| C7   | C6   | C5   | 120.4(3) | C35  | C30  | P2   | 122.0(2) |
| C11  | C6   | C5   | 121.2(3) | C35  | C30  | C31  | 119.8(3) |
| C11  | C6   | C7   | 118.4(3) | C32  | C31  | C30  | 119.6(3) |
| C8   | C7   | C6   | 120.5(4) | C31  | C32  | C33  | 120.2(3) |
| C9   | C8   | C7   | 120.2(4) | C34  | C33  | C32  | 120.4(3) |
| C10  | C9   | C8   | 119.9(4) | C33  | C34  | C35  | 119.8(3) |
| C9   | C10  | C11  | 120.3(4) | C34  | C35  | C30  | 120.2(3) |
| C10  | C11  | C6   | 120.8(4) | C37  | C36  | P2   | 119.4(2) |
| N2   | C12  | C13  | 106.9(3) | C37  | C36  | C41  | 118.9(3) |
| C5   | C12  | N2   | 120.9(3) | C41  | C36  | P2   | 121.7(2) |
| C5   | C12  | C13  | 132.2(3) | C38  | C37  | C36  | 119.9(3) |
| C14  | C13  | C12  | 108.7(3) | C37  | C38  | C39  | 120.6(4) |
| C13  | C14  | C15  | 106.7(3) | C40  | C39  | C38  | 119.9(3) |
| N2   | C15  | C14  | 109.6(3) | C39  | C40  | C41  | 119.8(3) |
| N3   | C15  | N2   | 122.0(3) | C40  | C41  | C36  | 120.9(3) |
| N3   | C15  | C14  | 128.4(3) | C43  | C42  | P2   | 111.3(2) |
| N3   | C16  | C17  | 111.6(2) | N6   | C43  | C42  | 112.4(3) |
| C16  | C17  | P1   | 112.6(2) | N5   | C44  | C45  | 109.1(3) |



| Atom | Atom | Atom | Angle/°  | Atom | Atom | Atom | Angle/°  |
|------|------|------|----------|------|------|------|----------|
| N6   | C44  | N5   | 122.9(3) | C55  | C54  | C53  | 120.0    |
| N6   | C44  | C45  | 128.0(3) | C58A | C53A | C48  | 117.2(4) |
| C46  | C45  | C44  | 106.8(3) | C58A | C53A | C54A | 120.0    |
| C45  | C46  | C47  | 108.7(3) | C54A | C53A | C48  | 122.7(4) |
| N5   | C47  | C46  | 107.3(3) | C53A | C58A | C57A | 120.0    |
| C48  | C47  | N5   | 121.3(3) | C56A | C57A | C58A | 120.0    |
| C48  | C47  | C46  | 131.4(3) | C55A | C56A | C57A | 120.0    |
| C47  | C48  | C49  | 120.2(3) | C56A | C55A | C54A | 120.0    |
| C47  | C48  | C53  | 121.7(4) | C55A | C54A | C53A | 120.0    |
| C47  | C48  | C53A | 117.8(4) | F1   | B1   | F2   | 109.3(3) |
| C49  | C48  | C53  | 117.7(4) | F1   | B1   | N1   | 112.6(3) |
| C49  | C48  | C53A | 120.7(4) | F1   | B1   | N2   | 110.5(3) |
| N4   | C49  | C48  | 119.8(3) | F2   | B1   | N1   | 109.3(3) |
| N4   | C49  | C50  | 108.2(3) | F2   | B1   | N2   | 109.0(3) |
| C50  | C49  | C48  | 131.9(4) | N2   | B1   | N1   | 106.0(3) |
| C51  | C50  | C49  | 107.9(4) | F3   | B2   | F4   | 109.8(3) |
| C52  | C51  | C50  | 106.5(3) | F3   | B2   | N4   | 112.2(3) |
| N4   | C52  | Cl4  | 119.8(3) | F3   | B2   | N5   | 109.6(3) |
| N4   | C52  | C51  | 110.8(4) | F4   | B2   | N4   | 110.6(3) |
| C51  | C52  | Cl4  | 129.3(3) | F4   | B2   | N5   | 108.9(3) |
| C58  | C53  | C48  | 123.1(3) | N4   | B2   | N5   | 105.6(3) |
| C58  | C53  | C54  | 120.0    | Cl1D | C1D  | Cl2D | 113.0    |
| C54  | C53  | C48  | 116.8(3) | Cl1F | C1F  | Cl2F | 112.9    |
| C57  | C58  | C53  | 120.0    | Cl1A | C1A  | Cl2A | 112.9    |
| C58  | C57  | C56  | 120.0    | Cl1C | C1C  | Cl2C | 112.9    |
| C55  | C56  | C57  | 120.0    | Cl2E | C1E  | Cl1E | 112.9    |
| C56  | C55  | C54  | 120.0    | Cl2B | C1B  | Cl1B | 112.9    |

Table S 29: Torsion Angles in ° for **BODI-Au-7**.

| Atom | Atom | Atom | Atom | Angle/°  |
|------|------|------|------|----------|
| Au1  | P1   | C17  | C16  | -61.6(3) |
| Au1  | P1   | C18  | C19  | -71.4(2) |
| Au1  | P1   | C18  | C23  | 103.5(3) |
| Au1  | P1   | C24  | C25  | 165.6(3) |

| Atom | Atom | Atom | Atom | Angle/°   |
|------|------|------|------|-----------|
| Au1  | P1   | C24  | C29  | -15.5(3)  |
| Au2  | P2   | C30  | C31  | 58.5(3)   |
| Au2  | P2   | C30  | C35  | -119.9(2) |
| Au2  | P2   | C36  | C37  | 17.1(3)   |
| Au2  | P2   | C36  | C41  | -162.8(2) |
| Au2  | P2   | C42  | C43  | 66.6(2)   |
| Cl1  | C1   | C2   | C3   | 178.6(3)  |
| P1   | C18  | C19  | C20  | 175.0(2)  |
| P1   | C18  | C23  | C22  | -174.8(3) |
| P1   | C24  | C25  | C26  | 178.4(3)  |
| P1   | C24  | C29  | C28  | -177.0(3) |
| P2   | C30  | C31  | C32  | -177.8(3) |
| P2   | C30  | C35  | C34  | 177.3(3)  |
| P2   | C36  | C37  | C38  | 179.5(3)  |
| P2   | C36  | C41  | C40  | -179.4(3) |
| P2   | C42  | C43  | N6   | 169.2(2)  |
| N1   | C1   | C2   | C3   | 0.5(4)    |
| N1   | C4   | C5   | C6   | 177.4(3)  |
| N1   | C4   | C5   | C12  | -3.5(4)   |
| N2   | C12  | C13  | C14  | -1.8(4)   |
| N3   | C16  | C17  | P1   | -166.4(2) |
| N4   | C49  | C50  | C51  | 0.5(4)    |
| N5   | C44  | C45  | C46  | -0.7(4)   |
| N5   | C47  | C48  | C49  | 1.2(5)    |
| N5   | C47  | C48  | C53  | 173.5(4)  |
| N5   | C47  | C48  | C53A | -166.2(4) |
| N6   | C44  | C45  | C46  | -179.9(3) |
| C1   | N1   | C4   | C3   | 0.3(3)    |
| C1   | N1   | C4   | C5   | 177.7(3)  |
| C1   | N1   | B1   | F1   | -48.6(4)  |
| C1   | N1   | B1   | F2   | 73.1(4)   |
| C1   | N1   | B1   | N2   | -169.5(3) |
| C1   | C2   | C3   | C4   | -0.3(4)   |
| C2   | C3   | C4   | N1   | 0.0(4)    |
| C2   | C3   | C4   | C5   | -177.1(3) |

| Atom | Atom | Atom | Atom | Angle/°   |
|------|------|------|------|-----------|
| C3   | C4   | C5   | C6   | -5.8(5)   |
| C3   | C4   | C5   | C12  | 173.3(3)  |
| C4   | N1   | C1   | C11  | -178.8(2) |
| C4   | N1   | C1   | C2   | -0.5(4)   |
| C4   | N1   | B1   | F1   | 136.4(3)  |
| C4   | N1   | B1   | F2   | -101.9(3) |
| C4   | N1   | B1   | N2   | 15.5(4)   |
| C4   | C5   | C6   | C7   | -51.8(4)  |
| C4   | C5   | C6   | C11  | 127.7(3)  |
| C4   | C5   | C12  | N2   | 1.1(4)    |
| C4   | C5   | C12  | C13  | -177.2(3) |
| C5   | C6   | C7   | C8   | 179.8(3)  |
| C5   | C6   | C11  | C10  | 179.9(3)  |
| C5   | C12  | C13  | C14  | 176.7(3)  |
| C6   | C5   | C12  | N2   | -179.8(3) |
| C6   | C5   | C12  | C13  | 1.9(5)    |
| C6   | C7   | C8   | C9   | 0.0(5)    |
| C7   | C6   | C11  | C10  | -0.6(5)   |
| C7   | C8   | C9   | C10  | 0.2(6)    |
| C8   | C9   | C10  | C11  | -0.5(6)   |
| C9   | C10  | C11  | C6   | 0.7(6)    |
| C11  | C6   | C7   | C8   | 0.2(5)    |
| C12  | N2   | C15  | N3   | -179.8(3) |
| C12  | N2   | C15  | C14  | -0.9(3)   |
| C12  | N2   | B1   | F1   | -140.4(3) |
| C12  | N2   | B1   | F2   | 99.5(3)   |
| C12  | N2   | B1   | N1   | -18.1(4)  |
| C12  | C5   | C6   | C7   | 129.1(3)  |
| C12  | C5   | C6   | C11  | -51.4(4)  |
| C12  | C13  | C14  | C15  | 1.2(4)    |
| C13  | C14  | C15  | N2   | -0.2(4)   |
| C13  | C14  | C15  | N3   | 178.6(3)  |
| C15  | N2   | C12  | C5   | -177.0(3) |
| C15  | N2   | C12  | C13  | 1.6(3)    |
| C15  | N2   | B1   | F1   | 49.5(4)   |

| Atom | Atom | Atom | Atom | Angle/°   |
|------|------|------|------|-----------|
| C15  | N2   | B1   | F2   | -70.6(4)  |
| C15  | N2   | B1   | N1   | 171.8(3)  |
| C15  | N3   | C16  | C17  | -102.3(4) |
| C16  | N3   | C15  | N2   | -176.6(3) |
| C16  | N3   | C15  | C14  | 4.7(5)    |
| C17  | P1   | C18  | C19  | 55.4(3)   |
| C17  | P1   | C18  | C23  | -129.8(3) |
| C17  | P1   | C24  | C25  | 35.8(3)   |
| C17  | P1   | C24  | C29  | -145.3(3) |
| C18  | P1   | C17  | C16  | 176.7(2)  |
| C18  | P1   | C24  | C25  | -74.3(3)  |
| C18  | P1   | C24  | C29  | 104.6(3)  |
| C18  | C19  | C20  | C21  | -0.1(5)   |
| C19  | C18  | C23  | C22  | 0.0(5)    |
| C19  | C20  | C21  | C22  | 0.1(5)    |
| C20  | C21  | C22  | C23  | -0.1(5)   |
| C21  | C22  | C23  | C18  | 0.0(5)    |
| C23  | C18  | C19  | C20  | 0.1(5)    |
| C24  | P1   | C17  | C16  | 64.9(3)   |
| C24  | P1   | C18  | C19  | 167.0(2)  |
| C24  | P1   | C18  | C23  | -18.2(3)  |
| C24  | C25  | C26  | C27  | -1.3(6)   |
| C25  | C24  | C29  | C28  | 1.9(5)    |
| C25  | C26  | C27  | C28  | 1.9(6)    |
| C26  | C27  | C28  | C29  | -0.6(5)   |
| C27  | C28  | C29  | C24  | -1.4(5)   |
| C29  | C24  | C25  | C26  | -0.6(5)   |
| C30  | P2   | C36  | C37  | -105.8(3) |
| C30  | P2   | C36  | C41  | 74.3(3)   |
| C30  | P2   | C42  | C43  | -169.8(2) |
| C30  | C31  | C32  | C33  | 0.4(5)    |
| C31  | C30  | C35  | C34  | -1.2(5)   |
| C31  | C32  | C33  | C34  | -1.1(6)   |
| C32  | C33  | C34  | C35  | 0.6(5)    |
| C33  | C34  | C35  | C30  | 0.5(5)    |

| Atom | Atom | Atom | Atom | Angle/°   |
|------|------|------|------|-----------|
| C35  | C30  | C31  | C32  | 0.7(5)    |
| C36  | P2   | C30  | C31  | -178.3(2) |
| C36  | P2   | C30  | C35  | 3.2(3)    |
| C36  | P2   | C42  | C43  | -58.7(2)  |
| C36  | C37  | C38  | C39  | 0.4(7)    |
| C37  | C36  | C41  | C40  | 0.7(5)    |
| C37  | C38  | C39  | C40  | -0.3(7)   |
| C38  | C39  | C40  | C41  | 0.4(6)    |
| C39  | C40  | C41  | C36  | -0.6(5)   |
| C41  | C36  | C37  | C38  | -0.6(6)   |
| C42  | P2   | C30  | C31  | -68.1(3)  |
| C42  | P2   | C30  | C35  | 113.4(3)  |
| C42  | P2   | C36  | C37  | 145.0(3)  |
| C42  | P2   | C36  | C41  | -34.9(3)  |
| C43  | N6   | C44  | N5   | 168.8(3)  |
| C43  | N6   | C44  | C45  | -12.0(5)  |
| C44  | N5   | C47  | C46  | -2.3(4)   |
| C44  | N5   | C47  | C48  | 176.6(3)  |
| C44  | N5   | B2   | F3   | -55.5(4)  |
| C44  | N5   | B2   | F4   | 64.5(4)   |
| C44  | N5   | B2   | N4   | -176.6(3) |
| C44  | N6   | C43  | C42  | 106.1(3)  |
| C44  | C45  | C46  | C47  | -0.8(4)   |
| C45  | C46  | C47  | N5   | 1.9(4)    |
| C45  | C46  | C47  | C48  | -176.9(4) |
| C46  | C47  | C48  | C49  | 179.8(4)  |
| C46  | C47  | C48  | C53  | -7.9(7)   |
| C46  | C47  | C48  | C53A | 12.4(6)   |
| C47  | N5   | C44  | N6   | -178.8(3) |
| C47  | N5   | C44  | C45  | 1.9(3)    |
| C47  | N5   | B2   | F3   | 128.8(3)  |
| C47  | N5   | B2   | F4   | -111.2(3) |
| C47  | N5   | B2   | N4   | 7.7(4)    |
| C47  | C48  | C49  | N4   | 2.5(5)    |
| C47  | C48  | C49  | C50  | -174.3(4) |

| Atom | Atom | Atom | Atom | Angle/°   |
|------|------|------|------|-----------|
| C47  | C48  | C53  | C58  | -121.3(4) |
| C47  | C48  | C53  | C54  | 55.8(5)   |
| C47  | C48  | C53A | C58A | -125.2(5) |
| C47  | C48  | C53A | C54A | 50.9(6)   |
| C48  | C49  | C50  | C51  | 177.6(4)  |
| C48  | C53  | C58  | C57  | 177.1(5)  |
| C48  | C53  | C54  | C55  | -177.3(4) |
| C48  | C53A | C58A | C57A | 176.2(7)  |
| C48  | C53A | C54A | C55A | -176.0(7) |
| C49  | N4   | C52  | Cl4  | -179.7(2) |
| C49  | N4   | C52  | C51  | 0.5(4)    |
| C49  | N4   | B2   | F3   | -123.1(3) |
| C49  | N4   | B2   | F4   | 113.9(3)  |
| C49  | N4   | B2   | N5   | -3.8(4)   |
| C49  | C48  | C53  | C58  | 51.1(5)   |
| C49  | C48  | C53  | C54  | -131.7(3) |
| C49  | C48  | C53A | C58A | 67.4(6)   |
| C49  | C48  | C53A | C54A | -116.5(5) |
| C49  | C50  | C51  | C52  | -0.2(4)   |
| C50  | C51  | C52  | Cl4  | 180.0(3)  |
| C50  | C51  | C52  | N4   | -0.2(4)   |
| C52  | N4   | C49  | C48  | -178.1(3) |
| C52  | N4   | C49  | C50  | -0.6(4)   |
| C52  | N4   | B2   | F3   | 53.7(4)   |
| C52  | N4   | B2   | F4   | -69.3(4)  |
| C52  | N4   | B2   | N5   | 173.0(3)  |
| C53  | C48  | C49  | N4   | -170.0(4) |
| C53  | C48  | C49  | C50  | 13.1(6)   |
| C53  | C58  | C57  | C56  | 0.0       |
| C58  | C53  | C54  | C55  | 0.0       |
| C58  | C57  | C56  | C55  | 0.0       |
| C57  | C56  | C55  | C54  | 0.0       |
| C56  | C55  | C54  | C53  | 0.0       |
| C54  | C53  | C58  | C57  | 0.0       |
| C53A | C48  | C49  | N4   | 169.5(4)  |

| Atom | Atom | Atom | Atom | Angle/°   |
|------|------|------|------|-----------|
| C53A | C48  | C49  | C50  | -7.3(6)   |
| C53A | C58A | C57A | C56A | 0.0       |
| C58A | C53A | C54A | C55A | 0.0       |
| C58A | C57A | C56A | C55A | 0.0       |
| C57A | C56A | C55A | C54A | 0.0       |
| C56A | C55A | C54A | C53A | 0.0       |
| C54A | C53A | C58A | C57A | 0.0       |
| B1   | N1   | C1   | Cl1  | 5.6(4)    |
| B1   | N1   | C1   | C2   | -176.2(3) |
| B1   | N1   | C4   | C3   | 176.2(3)  |
| B1   | N1   | C4   | C5   | -6.4(4)   |
| B1   | N2   | C12  | C5   | 11.4(5)   |
| B1   | N2   | C12  | C13  | -170.0(3) |
| B1   | N2   | C15  | N3   | -8.3(5)   |
| B1   | N2   | C15  | C14  | 170.6(3)  |
| B2   | N4   | C49  | C48  | -0.7(5)   |
| B2   | N4   | C49  | C50  | 176.8(3)  |
| B2   | N4   | C52  | Cl4  | 3.0(5)    |
| B2   | N4   | C52  | C51  | -176.9(3) |
| B2   | N5   | C44  | N6   | 4.8(5)    |
| B2   | N5   | C44  | C45  | -174.5(3) |
| B2   | N5   | C47  | C46  | 174.0(3)  |
| B2   | N5   | C47  | C48  | -7.0(5)   |

Table S30: Hydrogen Fractional Atomic Coordinates ( $\times 10^4$ ) and Equivalent Isotropic Displacement Parameters ( $\text{\AA}^2 \times 10^3$ ) for BODI-Au-7.  $U_{eq}$  is defined as 1/3 of the trace of the orthogonalised  $U_{ij}$ .

| Atom | x        | y       | z       | $U_{eq}$ |
|------|----------|---------|---------|----------|
| H3   | 4392.27  | 5704.04 | 5141.68 | 26       |
| H6   | 3929.44  | 8814.67 | 1877.08 | 23       |
| H2   | 5152.67  | 4042.56 | 8504.17 | 33       |
| H3A  | 6837.57  | 4317.54 | 8374.07 | 30       |
| H7   | 7719.83  | 5049.13 | 8769.6  | 33       |
| H8   | 9305.67  | 4943.42 | 9353.39 | 43       |
| H9   | 10497.18 | 4799.03 | 8425.47 | 48       |
| H10  | 10107    | 4765.01 | 6913.46 | 46       |
| H11  | 8526.02  | 4863.26 | 6322.28 | 38       |
| H13  | 7966.98  | 5651.7  | 6046.5  | 28       |
| H14  | 6898.34  | 6031.43 | 4896.15 | 28       |
| H16A | 4397.93  | 5982.12 | 3746.57 | 25       |
| H16B | 5504.28  | 6113.13 | 3967.07 | 25       |
| H17A | 5122.8   | 6720.26 | 4797.21 | 24       |
| H17B | 4036.52  | 6557.1  | 4817.9  | 24       |
| H19  | 5081.67  | 7532.89 | 4739.87 | 26       |
| H20  | 4677.58  | 8235.88 | 5261.59 | 31       |
| H21  | 3205.61  | 8557.38 | 4769.91 | 34       |
| H22  | 2134.08  | 8181.97 | 3769.42 | 37       |
| H23  | 2527.42  | 7479.15 | 3245.44 | 29       |
| H25  | 2573.75  | 6450.73 | 4062.83 | 37       |
| H26  | 1191.55  | 6135.88 | 3353.56 | 41       |
| H27  | 895.02   | 6174.07 | 1840.53 | 33       |
| H28  | 2025.51  | 6494.22 | 1005.37 | 31       |
| H29  | 3443.28  | 6786.37 | 1700.33 | 26       |
| H31  | 7692.19  | 7953.64 | 1718.27 | 30       |
| H32  | 9088.39  | 8128.83 | 1071.47 | 36       |
| H33  | 10024.96 | 8735.66 | 1576.86 | 37       |
| H34  | 9549     | 9184.43 | 2699.6  | 33       |
| H35  | 8142.6   | 9019.33 | 3340.95 | 25       |
| H37  | 6996.48  | 8341.06 | 4984.14 | 39       |
| H38  | 6806.48  | 8879.71 | 6049.59 | 55       |
| H39  | 6240.07  | 9587.22 | 5646.92 | 44       |



| Atom | x       | y       | z        | $U_{eq}$ |
|------|---------|---------|----------|----------|
| H40  | 5879.67 | 9762.63 | 4171.56  | 30       |
| H41  | 6062.26 | 9227.6  | 3100.45  | 27       |
| H42A | 5821.56 | 8705.97 | 1989.02  | 21       |
| H42B | 5793.37 | 8183.85 | 1768.67  | 21       |
| H43A | 4648.68 | 8054.6  | 2746.28  | 24       |
| H43B | 4772.14 | 8547.32 | 3142.48  | 24       |
| H45  | 3930.44 | 7593.19 | 1690.54  | 27       |
| H46  | 2493.46 | 7354.61 | 734.69   | 32       |
| H50  | -585.44 | 8453.55 | -608.99  | 46       |
| H51  | -673.66 | 9287.77 | -483.28  | 50       |
| H58  | 606.8   | 7969.71 | -1500.69 | 56       |
| H57  | -82.25  | 7333.92 | -2187.8  | 71       |
| H56  | -349.85 | 6699.14 | -1355.36 | 67       |
| H55  | 71.6    | 6700.13 | 164.18   | 58       |
| H54  | 760.64  | 7335.92 | 851.31   | 47       |
| H58A | 419.11  | 7756.58 | -1335.75 | 47       |
| H57A | -410.29 | 7097.95 | -1727.21 | 63       |
| H56A | -738.11 | 6585.16 | -641.3   | 76       |
| H55A | -236.52 | 6731    | 836.09   | 61       |
| H54A | 592.88  | 7389.63 | 1227.57  | 42       |
| H1DA | 2323.5  | 5117.26 | 8673.05  | 45       |
| H1DB | 2305.85 | 5517.32 | 7979.51  | 45       |
| H1FA | 2480.87 | 5226.66 | 8348.83  | 65       |
| H1FB | 2838.36 | 5702.15 | 8036.09  | 65       |
| H1AA | 7662.83 | 6662.84 | 2274.3   | 54       |
| H1AB | 8533.8  | 6801.35 | 2976.78  | 54       |
| H1CA | 7858.25 | 6758.35 | 3021.57  | 65       |
| H1CB | 7555.56 | 6622.04 | 2021.08  | 65       |
| H1EA | 2110.06 | 3526.91 | 6898.9   | 56       |
| H1EB | 2501.58 | 3426.85 | 7897.8   | 56       |
| H1BA | 7520.88 | 4625.6  | 1759.19  | 73       |
| H1BB | 7419.47 | 4096.48 | 1658.68  | 73       |

Table S 31: Hydrogen Bond information for **BODI-Au-7**.

| D  | H  | A               | d(D-H)/Å | d(H-A)/Å | d(D-A)/Å | D-H-A/deg |
|----|----|-----------------|----------|----------|----------|-----------|
| N3 | H3 | F4 <sup>1</sup> | 0.88     | 2.18     | 2.932(4) | 143.5     |
| N6 | H6 | F2 <sup>2</sup> | 0.88     | 2.04     | 2.841(3) | 150.6     |

<sup>1</sup> $x, 3/2-y, 1/2+z$ ; <sup>2</sup> $x, 3/2-y, -1/2+z$

Table S 32: Atomic Occupancies for all atoms that are not fully occupied in **BODI-Au-7**.

| Atom | Occupancy | Atom | Occupancy |
|------|-----------|------|-----------|
| C53  | 0.612(7)  | Cl2F | 0.262(3)  |
| C58  | 0.612(7)  | C1F  | 0.262(3)  |
| H58  | 0.612(7)  | H1FA | 0.262(3)  |
| C57  | 0.612(7)  | H1FB | 0.262(3)  |
| H57  | 0.612(7)  | Cl1A | 0.547(3)  |
| C56  | 0.612(7)  | Cl2A | 0.547(3)  |
| H56  | 0.612(7)  | C1A  | 0.547(3)  |
| C55  | 0.612(7)  | H1AA | 0.547(3)  |
| H55  | 0.612(7)  | H1AB | 0.547(3)  |
| C54  | 0.612(7)  | Cl1C | 0.165(3)  |
| H54  | 0.612(7)  | Cl2C | 0.165(3)  |
| C53A | 0.388(7)  | C1C  | 0.165(3)  |
| C58A | 0.388(7)  | H1CA | 0.165(3)  |
| H58A | 0.388(7)  | H1CB | 0.165(3)  |
| C57A | 0.388(7)  | Cl1E | 0.307(2)  |
| H57A | 0.388(7)  | Cl2E | 0.307(2)  |
| C56A | 0.388(7)  | C1E  | 0.307(2)  |
| H56A | 0.388(7)  | H1EA | 0.307(2)  |
| C55A | 0.388(7)  | H1EB | 0.307(2)  |
| H55A | 0.388(7)  | Cl1B | 0.288(2)  |
| C54A | 0.388(7)  | Cl2B | 0.288(2)  |
| H54A | 0.388(7)  | C1B  | 0.288(2)  |
| Cl1D | 0.430(3)  | H1BA | 0.288(2)  |
| Cl2D | 0.430(3)  | H1BB | 0.288(2)  |
| C1D  | 0.430(3)  |      |           |
| H1DA | 0.430(3)  |      |           |
| H1DB | 0.430(3)  |      |           |
| Cl1F | 0.262(3)  |      |           |

Submitted by: **Jacques Pliquet**Solved by: **Yoann Rousselin**Sample ID: **17jpl382**

## Crystal Data and Experimental

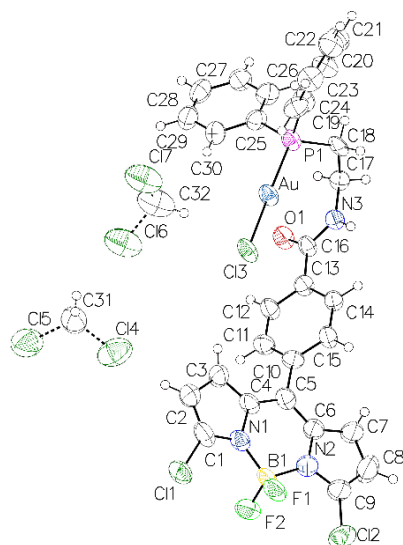

**Experimental.** Single clear light pink plate-shaped crystals of (**BODI-Au-10**) were recrystallised from DCM by slow evaporation. A suitable crystal (0.51x0.13x0.05) mm<sup>3</sup> was selected and mounted on a MITIGEN holder oil on a Nonius Kappa Apex II diffractometer. The crystal was kept at  $T = 115(1)$  K during data collection. Using **Olex2** (Dolomanov et al., 2009), the structure was solved with the **ShelXT** (Sheldrick, 2015) structure solution program, using the Intrinsic Phasing solution method. The model was refined with version 2018/1 of **ShelXL** (Sheldrick, 2015) using Least Squares minimisation.

**Crystal Data.** C<sub>127</sub>H<sub>106</sub>Au<sub>4</sub>B<sub>4</sub>Cl<sub>26</sub>F<sub>8</sub>N<sub>12</sub>O<sub>4</sub>P<sub>4</sub>,  $M_r = 3892.92$ , orthorhombic, Pbc<sub>a</sub> (No. 61),  $a = 25.643(4)$  Å,  $b = 9.4006(16)$  Å,  $c = 30.308(5)$  Å,  $\alpha = \beta = \gamma = 90^\circ$ ,  $V = 7306(2)$  Å<sup>3</sup>,  $T = 115(1)$  K,  $Z = 2$ ,  $Z' = 0.25$ ,  $\mu(\text{MoK}\alpha) = 4.588$ , 151102 reflections measured, 6424 unique ( $R_{\text{int}} = 0.0918$ ) which were used in all calculations. The final  $wR_2$  was 0.1979 (all data) and  $R_1$  was 0.0732 ( $I > 2(I)$ ).

Table S33: X-ray structure data of **BODI-Au-10**.

| Compound                              | <b>BODI-Au-10</b>                                                                                                                              |
|---------------------------------------|------------------------------------------------------------------------------------------------------------------------------------------------|
| CCDC                                  | <b>1825952</b>                                                                                                                                 |
| Formula                               | C <sub>127</sub> H <sub>106</sub> Au <sub>4</sub> B <sub>4</sub> Cl <sub>26</sub> F <sub>8</sub> N <sub>12</sub> O <sub>4</sub> P <sub>4</sub> |
| $D_{\text{calc.}} / \text{g cm}^{-3}$ | 1.770                                                                                                                                          |
| $\mu / \text{mm}^{-1}$                | 4.588                                                                                                                                          |
| Formula Weight                        | 3892.92                                                                                                                                        |
| Colour                                | clear light pink                                                                                                                               |
| Shape                                 | plate                                                                                                                                          |
| Size/mm <sup>3</sup>                  | 0.51x0.13x0.05                                                                                                                                 |
| $T/\text{K}$                          | 115(1)                                                                                                                                         |
| Crystal System                        | orthorhombic                                                                                                                                   |
| Space Group                           | Pbc <sub>a</sub>                                                                                                                               |
| $a/\text{Å}$                          | 25.643(4)                                                                                                                                      |
| $b/\text{Å}$                          | 9.4006(16)                                                                                                                                     |
| $c/\text{Å}$                          | 30.308(5)                                                                                                                                      |
| $\alpha^\circ$                        | 90                                                                                                                                             |
| $\beta^\circ$                         | 90                                                                                                                                             |
| $\gamma^\circ$                        | 90                                                                                                                                             |
| $V/\text{Å}^3$                        | 7306(2)                                                                                                                                        |
| $Z$                                   | 2                                                                                                                                              |
| $Z'$                                  | 0.25                                                                                                                                           |
| Wavelength/Å                          | 0.71073                                                                                                                                        |
| Radiation type                        | MoK $\alpha$                                                                                                                                   |
| $\theta_{\text{min}}/^\circ$          | 2.671                                                                                                                                          |
| $\theta_{\text{max}}/^\circ$          | 25.000                                                                                                                                         |
| Measured Refl.                        | 151102                                                                                                                                         |
| Independent Refl.                     | 6424                                                                                                                                           |
| Reflections Used                      | 4993                                                                                                                                           |
| $R_{\text{int}}$                      | 0.0918                                                                                                                                         |
| Parameters                            | 415                                                                                                                                            |
| Restraints                            | 0                                                                                                                                              |
| Largest Peak                          | 2.462                                                                                                                                          |
| Deepest Hole                          | -2.994                                                                                                                                         |
| GooF                                  | 1.168                                                                                                                                          |
| $wR_2$ (all data)                     | 0.1979                                                                                                                                         |
| $wR_2$                                | 0.1845                                                                                                                                         |
| $R_1$ (all data)                      | 0.0907                                                                                                                                         |
| $R_1$                                 | 0.0732                                                                                                                                         |

Table S 34: **BODI-Au-10** structure Quality Indicators.

|                     |            |        |             |      |                  |       |          |       |
|---------------------|------------|--------|-------------|------|------------------|-------|----------|-------|
| <b>Reflections:</b> | d min (Mo) | 0.84   | 1/ $\sigma$ | 20.4 | R <sub>int</sub> | 9.18% | complete | 100%  |
| <b>Refinement:</b>  | Shift      | -0.001 | Max Peak    | 2.5  | Min Peak         | -3.0  | Goof     | 1.168 |

A clear light pink plate-shaped crystal with dimensions 0.51x0.13x0.05 mm<sup>3</sup> was mounted on a MITIGEN holder oil. X-ray diffraction data were collected using a Nonius Kappa Apex II diffractometer equipped with a Oxford Cryosystems low-temperature device, operating at  $T = 115(1)$  K. Data were measured using  $\phi$  and  $\omega$  scans of 0.6° per frame for 120s using MoK $\alpha$  radiation (X-ray tube, 50 kV, 32 mA). The total number of runs and images was based on the strategy calculation from the program APEX3 (Bruker, 2015). The maximum resolution achieved was  $\theta = 25.000^\circ$ . Cell parameters were retrieved using the **SAINT** (Bruker, V8.38A, after 2013) software and refined using **SAINT** (Bruker, V8.38A, after 2013) on 9817 reflections, 6 % of the observed reflections. Data reduction was performed using the **SAINT** (Bruker, V8.38A, after 2013) software which corrects for Lorentz polarisation. The final completeness is 99.90 % out to 25.000° in  $\theta$ . A multi-scan absorption correction was performed using SADABS-2016/2 (Bruker, 2016/2) was used for absorption correction.  $wR_2(\text{int})$  was 0.1173 before and 0.0831 after correction. The Ratio of minimum to maximum transmission is 0.1990. The  $\lambda/2$  correction factor is Not present. The absorption coefficient  $\mu$  of this material is 4.588 mm<sup>-1</sup> at this wavelength ( $\lambda = 0.71073\text{\AA}$ ) and the minimum and maximum transmissions are 0.0041 and 0.0206. The structure was solved in the space group *Pbca* (# 61) by Intrinsic Phasing using the **ShelXT** (Sheldrick, 2015) structure solution program and refined by Least Squares using version 2018/1 of **ShelXL** (Sheldrick, 2015). All non-hydrogen atoms were refined anisotropically. Hydrogen atom positions were calculated geometrically and refined using the riding model. SADABS-2016/2 (Bruker, 2016/2) was used for absorption correction.  $wR_2(\text{int})$  was 0.1173 before and 0.0831 after correction. The Ratio of minimum to maximum transmission is 0.1990. The value of  $Z'$  is 0.25.

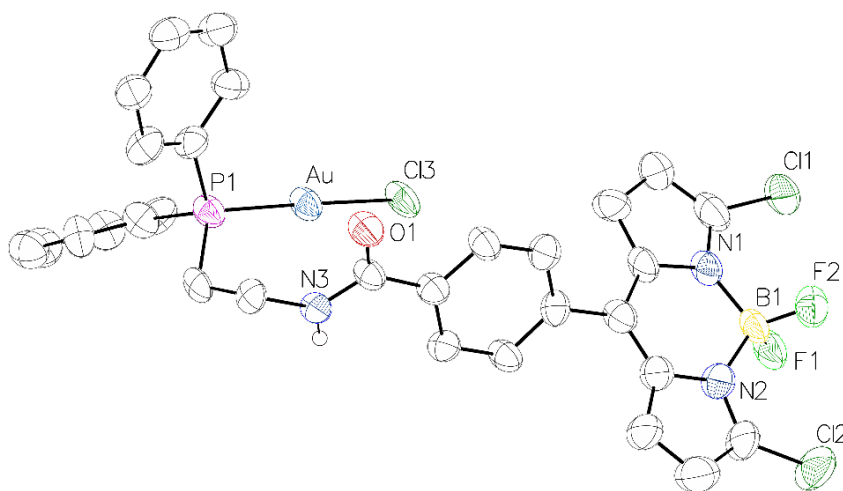

Figure S 132: ORTEP view of **BODI-Au-10**. Thermal ellipsoids are drawn at 50% probability level. Solvent molecules and H-atoms on carbon atom are omitted for clarity.

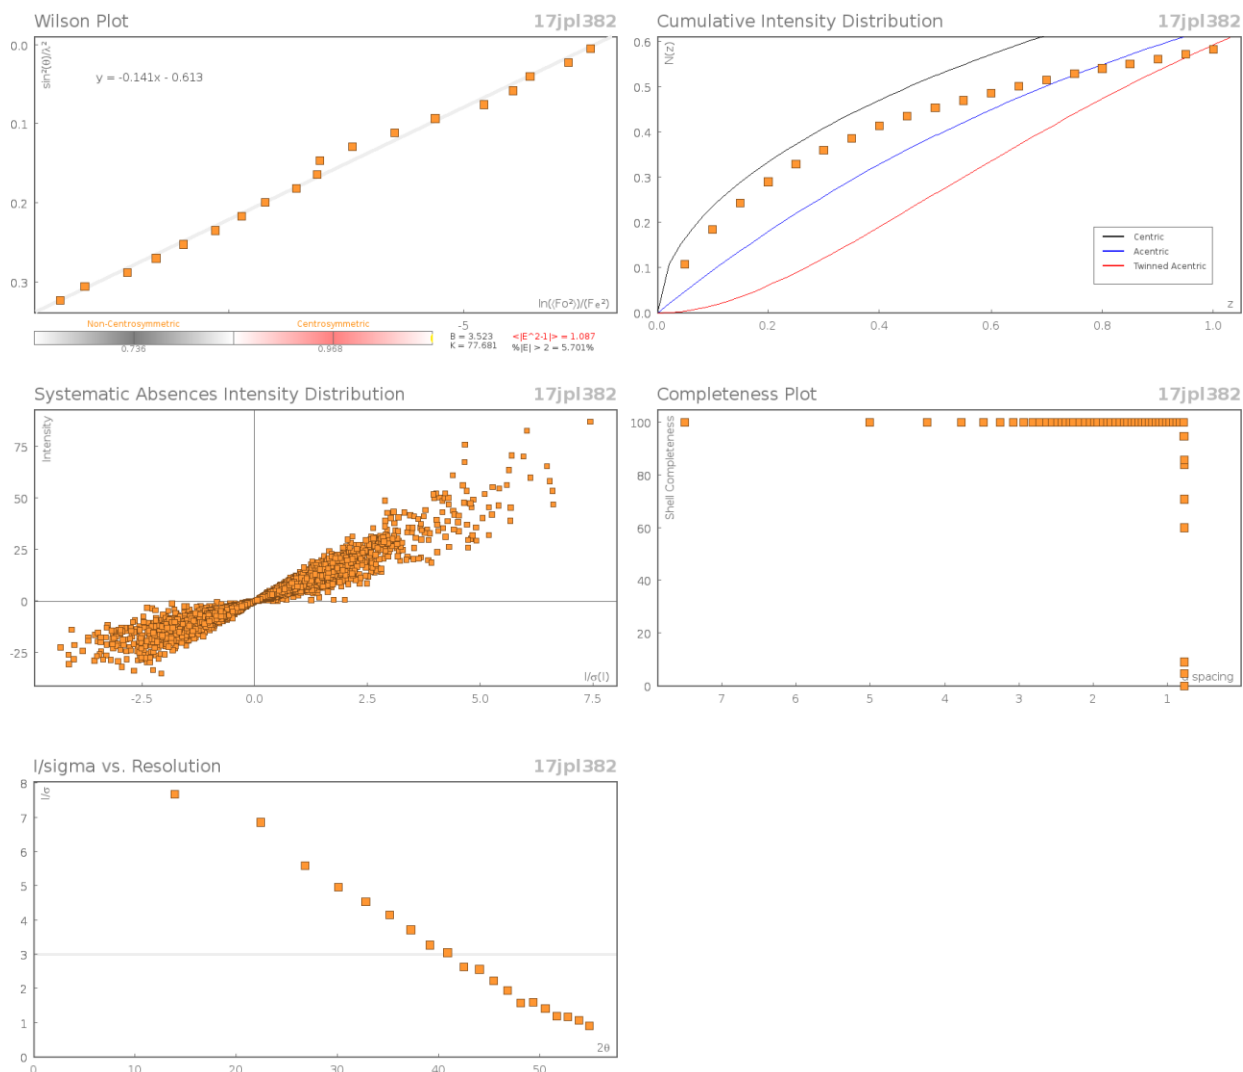

Figure S 133: Data Plots: Diffraction Data of **BODI-Au-10** structure.

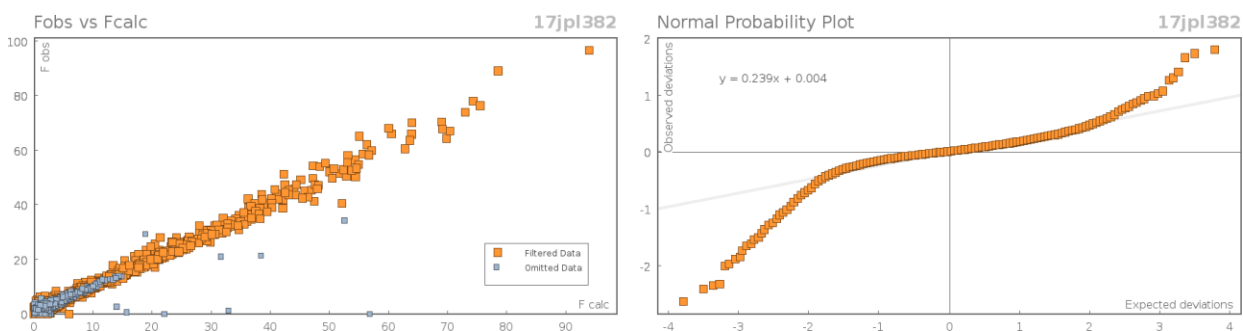

Figure S 134: Data Plots: refinement and Data of **BODI-Au-10** structure.

Table S 35: reflection statistics of **BODI-Au-10** structure.

|                                     |              |                          |                 |
|-------------------------------------|--------------|--------------------------|-----------------|
| Total reflections (after filtering) | 161317       | Unique reflections       | 6424            |
| Completeness                        | 0.999        | Mean $I/\sigma$          | 20.37           |
| $hkl_{\max}$ collected              | (33, 10, 39) | $hkl_{\min}$ collected   | (-33, -12, -39) |
| $hkl_{\max}$ used                   | (30, 11, 36) | $hkl_{\min}$ used        | (0, 0, 0)       |
| Lim $d_{\max}$ collected            | 100.0        | Lim $d_{\min}$ collected | 0.84            |

|                             |                                                              |                            |        |
|-----------------------------|--------------------------------------------------------------|----------------------------|--------|
| d <sub>max</sub> used       | 25.64                                                        | d <sub>min</sub> used      | 0.84   |
| Friedel pairs               | 25777                                                        | Friedel pairs merged       | 1      |
| Inconsistent equivalents    | 0                                                            | R <sub>int</sub>           | 0.0918 |
| R <sub>sigma</sub>          | 0.0282                                                       | Intensity transformed      | 0      |
| Omitted reflections         | 0                                                            | Omitted by user (OMIT hkl) | 44     |
| Multiplicity                | (6368, 12582, 14535, 15028, 9624, 763, 216, 127, 54, 23, 78) | Maximum multiplicity       | 41     |
| Removed systematic absences | 10171                                                        | Filtered off (Shel/OMIT)   | 30732  |

Table S36: Fractional Atomic Coordinates ( $\times 10^4$ ) and Equivalent Isotropic Displacement Parameters ( $\text{\AA}^2 \times 10^3$ ) for BODI-Au-10.  $U_{eq}$  is defined as 1/3 of the trace of the orthogonalised  $U_{ij}$ .

| Atom | x          | y         | z          | $U_{eq}$  |
|------|------------|-----------|------------|-----------|
| Au   | 6446.1(2)  | 3749.6(5) | 2959.0(2)  | 46.59(19) |
| Cl1  | 7750.5(16) | 2732(4)   | 6052.1(10) | 72.2(10)  |
| Cl2  | 9581(2)    | 6483(6)   | 5602.5(13) | 104.4(18) |
| Cl3  | 6526.8(15) | 3833(3)   | 3712.2(9)  | 56.6(8)   |
| P1   | 6343.1(13) | 3786(3)   | 2226(1)    | 44.8(7)   |
| F1   | 8431(3)    | 5431(8)   | 5789(2)    | 62(2)     |
| F2   | 8942(3)    | 3478(8)   | 5689(2)    | 63(2)     |
| O1   | 7799(4)    | 2016(9)   | 2558(3)    | 56(2)     |
| N1   | 8141(4)    | 3627(11)  | 5285(3)    | 50(2)     |
| N2   | 8881(5)    | 5202(12)  | 5092(3)    | 57(3)     |
| N3   | 7583(4)    | 4313(10)  | 2452(3)    | 43(2)     |
| C1   | 7749(6)    | 2941(15)  | 5493(4)    | 65(4)     |
| C2   | 7382(6)    | 2398(17)  | 5202(4)    | 70(4)     |
| C3   | 7547(6)    | 2799(15)  | 4785(4)    | 61(4)     |
| C4   | 8008(5)    | 3567(13)  | 4839(4)    | 52(3)     |
| C5   | 8331(5)    | 4207(13)  | 4520(4)    | 49(3)     |
| C6   | 8751(5)    | 5020(14)  | 4650(4)    | 53(3)     |
| C7   | 9135(6)    | 5768(18)  | 4402(4)    | 75(5)     |
| C8   | 9475(8)    | 6380(20)  | 4685(6)    | 97(6)     |
| C9   | 9317(7)    | 6004(19)  | 5114(4)    | 78(5)     |
| C10  | 8197(5)    | 4014(13)  | 4047(4)    | 45(3)     |
| C11  | 8135(5)    | 2639(14)  | 3877(4)    | 53(3)     |
| C12  | 8010(5)    | 2440(13)  | 3447(4)    | 49(3)     |
| C13  | 7925(5)    | 3580(12)  | 3163(4)    | 45(3)     |
| C14  | 8001(5)    | 4962(12)  | 3326(4)    | 43(3)     |
| C15  | 8135(5)    | 5176(13)  | 3762(4)    | 49(3)     |

| Atom | x          | y        | z          | $U_{eq}$  |
|------|------------|----------|------------|-----------|
| C16  | 7774(5)    | 3258(12) | 2700(3)    | 42(3)     |
| C17  | 7412(5)    | 4096(13) | 2003(3)    | 43(3)     |
| C18  | 6860(5)    | 4659(13) | 1920(3)    | 45(3)     |
| C19  | 5772(5)    | 4867(14) | 2076(4)    | 52(3)     |
| C20  | 5684(6)    | 5252(16) | 1645(4)    | 61(3)     |
| C21  | 5284(6)    | 6176(16) | 1540(5)    | 64(4)     |
| C22  | 4976(6)    | 6750(16) | 1861(5)    | 66(4)     |
| C23  | 5069(6)    | 6369(16) | 2291(5)    | 65(4)     |
| C24  | 5466(5)    | 5421(15) | 2408(5)    | 58(3)     |
| C25  | 6286(5)    | 2030(13) | 1974(4)    | 49(3)     |
| C26  | 6361(5)    | 1775(16) | 1536(4)    | 56(3)     |
| C27  | 6321(5)    | 436(15)  | 1359(4)    | 58(3)     |
| C28  | 6197(5)    | -697(15) | 1626(5)    | 59(3)     |
| C29  | 6130(6)    | -507(16) | 2067(5)    | 66(4)     |
| C30  | 6175(5)    | 864(14)  | 2255(5)    | 54(3)     |
| B1   | 8601(6)    | 4442(15) | 5487(4)    | 50(3)     |
| Cl4  | 4955.9(19) | 4177(6)  | 6407.3(17) | 111.2(18) |
| Cl5  | 4405(2)    | 1605(5)  | 6695(2)    | 121(2)    |
| C31  | 4380(3)    | 3167(11) | 6375(5)    | 95(6)     |
| Cl6  | 4435(3)    | 3478(9)  | 5192(3)    | 119.2(18) |
| Cl7  | 3523(3)    | 5185(9)  | 4941(3)    | 119.2(18) |
| C32  | 4163(5)    | 4670(30) | 4806(5)    | 119.2(18) |

Table S37: Anisotropic Displacement Parameters ( $\times 10^4$ ) **BODI-Au-10**. The anisotropic displacement factor exponent takes the form:  $-2\pi^2[h^2a^{*2}x U_{11} + \dots + 2hka^*x b^*x U_{12}]$ .

| Atom | $U_{11}$ | $U_{22}$ | $U_{33}$ | $U_{23}$ | $U_{13}$ | $U_{12}$ |
|------|----------|----------|----------|----------|----------|----------|
| Au   | 64.1(3)  | 43.4(3)  | 32.3(3)  | 2.90(19) | 5.58(19) | 1.6(2)   |
| Cl1  | 99(3)    | 83(3)    | 34.5(15) | 10.1(16) | 2.1(16)  | -15(2)   |
| Cl2  | 122(4)   | 142(4)   | 49(2)    | -5(2)    | -14(2)   | -65(3)   |
| Cl3  | 99(2)    | 40.5(16) | 30.6(14) | 4.5(12)  | 5.6(14)  | 4.0(16)  |
| P1   | 59.8(18) | 39.6(16) | 34.9(15) | 2.4(13)  | 3.6(13)  | 2.5(15)  |
| F1   | 93(5)    | 61(5)    | 33(4)    | 7(3)     | -1(3)    | 0(4)     |
| F2   | 76(5)    | 65(5)    | 49(4)    | 0(4)     | -13(4)   | 8(4)     |
| O1   | 90(7)    | 37(5)    | 41(4)    | -6(4)    | -1(4)    | 2(4)     |
| N1   | 74(7)    | 49(6)    | 29(5)    | 1(4)     | 2(5)     | -3(5)    |
| N2   | 78(8)    | 57(7)    | 36(5)    | -8(5)    | -1(5)    | -13(6)   |

| Atom | $U_{11}$ | $U_{22}$ | $U_{33}$ | $U_{23}$ | $U_{13}$ | $U_{12}$ |
|------|----------|----------|----------|----------|----------|----------|
| N3   | 69(6)    | 34(5)    | 27(4)    | -8(4)    | 1(4)     | -3(5)    |
| C1   | 96(11)   | 55(8)    | 43(7)    | 13(6)    | 5(7)     | 0(8)     |
| C2   | 82(10)   | 76(10)   | 51(8)    | 12(7)    | -4(7)    | -24(9)   |
| C3   | 73(9)    | 67(9)    | 43(7)    | 5(7)     | 3(6)     | -23(7)   |
| C4   | 80(9)    | 48(7)    | 27(5)    | 1(5)     | 0(5)     | -4(7)    |
| C5   | 66(8)    | 42(7)    | 40(6)    | -1(5)    | 4(6)     | 1(6)     |
| C6   | 64(8)    | 56(8)    | 39(6)    | 0(6)     | 1(6)     | -9(7)    |
| C7   | 95(11)   | 92(11)   | 38(7)    | 1(7)     | -8(7)    | -39(9)   |
| C8   | 126(15)  | 97(14)   | 68(11)   | -1(9)    | -2(10)   | -61(12)  |
| C9   | 95(11)   | 100(13)  | 38(7)    | 4(7)     | -11(7)   | -37(10)  |
| C10  | 52(7)    | 51(7)    | 31(5)    | -7(5)    | -2(5)    | 4(6)     |
| C11  | 71(8)    | 52(7)    | 37(6)    | -2(6)    | -5(6)    | -4(7)    |
| C12  | 75(8)    | 35(6)    | 38(6)    | 1(5)     | -1(6)    | 1(6)     |
| C13  | 56(7)    | 38(6)    | 42(6)    | -4(5)    | 2(5)     | 2(5)     |
| C14  | 56(7)    | 38(6)    | 36(6)    | -1(5)    | 2(5)     | -3(5)    |
| C15  | 78(9)    | 35(6)    | 34(6)    | -2(5)    | 4(6)     | -5(6)    |
| C16  | 56(7)    | 39(6)    | 31(5)    | 3(5)     | 7(5)     | 1(5)     |
| C17  | 54(7)    | 45(7)    | 30(5)    | -8(5)    | 7(5)     | -3(5)    |
| C18  | 77(8)    | 41(6)    | 17(5)    | 0(4)     | 4(5)     | 6(6)     |
| C19  | 58(7)    | 54(7)    | 44(7)    | 1(6)     | 11(6)    | 6(6)     |
| C20  | 68(8)    | 68(9)    | 45(7)    | 2(6)     | -3(6)    | 15(8)    |
| C21  | 76(9)    | 66(9)    | 51(8)    | 4(7)     | 3(7)     | -3(8)    |
| C22  | 75(9)    | 56(8)    | 67(9)    | -3(7)    | -1(8)    | 12(7)    |
| C23  | 63(8)    | 65(9)    | 66(9)    | -11(7)   | 8(7)     | 7(7)     |
| C24  | 46(7)    | 69(9)    | 57(8)    | -13(7)   | 2(6)     | -2(7)    |
| C25  | 55(7)    | 41(7)    | 50(7)    | -10(6)   | -5(6)    | -1(6)    |
| C26  | 68(8)    | 56(8)    | 43(7)    | -14(6)   | 4(6)     | -5(7)    |
| C27  | 73(9)    | 51(8)    | 49(7)    | -8(6)    | -5(6)    | -2(7)    |
| C28  | 58(8)    | 43(7)    | 76(10)   | -11(7)   | -1(7)    | -5(6)    |
| C29  | 62(9)    | 51(8)    | 84(11)   | 8(8)     | -8(7)    | -12(7)   |
| C30  | 59(8)    | 44(7)    | 59(8)    | 2(6)     | 2(6)     | -2(6)    |
| B1   | 81(10)   | 39(7)    | 29(6)    | 5(6)     | -4(6)    | 1(7)     |
| Cl4  | 89(3)    | 159(5)   | 85(3)    | -29(3)   | 6(2)     | -20(3)   |
| Cl5  | 125(4)   | 92(4)    | 145(5)   | -1(3)    | -45(4)   | 5(3)     |
| C31  | 128(16)  | 89(12)   | 69(11)   | 8(10)    | -11(11)  | -26(12)  |
| Cl6  | 133(4)   | 128(4)   | 96(3)    | -1(3)    | -22(3)   | 40(4)    |



| Atom | $U_{11}$ | $U_{22}$ | $U_{33}$ | $U_{23}$ | $U_{13}$ | $U_{12}$ |
|------|----------|----------|----------|----------|----------|----------|
| Cl7  | 133(4)   | 128(4)   | 96(3)    | -1(3)    | -22(3)   | 40(4)    |
| C32  | 133(4)   | 128(4)   | 96(3)    | -1(3)    | -22(3)   | 40(4)    |

Table S 38: Bond Lengths in Å for *BODI-Au-10*.

| Atom | Atom | Length/Å  | Atom | Atom | Length/Å  |
|------|------|-----------|------|------|-----------|
| Au   | Cl3  | 2.293(3)  | C8   | C9   | 1.41(2)   |
| Au   | P1   | 2.238(3)  | C10  | C11  | 1.400(17) |
| Cl1  | C1   | 1.707(13) | C10  | C15  | 1.402(16) |
| Cl2  | C9   | 1.689(14) | C11  | C12  | 1.355(16) |
| P1   | C18  | 1.814(12) | C12  | C13  | 1.392(16) |
| P1   | C19  | 1.840(13) | C13  | C14  | 1.404(16) |
| P1   | C25  | 1.825(12) | C13  | C16  | 1.485(16) |
| F1   | B1   | 1.375(16) | C14  | C15  | 1.379(16) |
| F2   | B1   | 1.401(16) | C17  | C18  | 1.533(17) |
| O1   | C16  | 1.247(14) | C19  | C20  | 1.374(17) |
| N1   | C1   | 1.351(17) | C19  | C24  | 1.378(17) |
| N1   | C4   | 1.395(15) | C20  | C21  | 1.380(19) |
| N1   | B1   | 1.534(18) | C21  | C22  | 1.36(2)   |
| N2   | C6   | 1.391(15) | C22  | C23  | 1.37(2)   |
| N2   | C9   | 1.352(18) | C23  | C24  | 1.399(19) |
| N2   | B1   | 1.567(17) | C25  | C26  | 1.362(17) |
| N3   | C16  | 1.338(15) | C25  | C30  | 1.419(18) |
| N3   | C17  | 1.442(13) | C26  | C27  | 1.371(19) |
| C1   | C2   | 1.39(2)   | C27  | C28  | 1.374(19) |
| C2   | C3   | 1.382(18) | C28  | C29  | 1.36(2)   |
| C3   | C4   | 1.396(18) | C29  | C30  | 1.413(19) |
| C4   | C5   | 1.408(17) | Cl4  | C31  | 1.7586    |
| C5   | C6   | 1.378(18) | Cl5  | C31  | 1.7596    |
| C5   | C10  | 1.486(16) | Cl6  | C32  | 1.7613    |
| C6   | C7   | 1.423(19) | Cl7  | C32  | 1.7596    |
| C7   | C8   | 1.35(2)   |      |      |           |

Table S 39: Bond Angles in ° for **BODI-Au-10**.

| Atom | Atom | Atom | Angle/°    | Atom | Atom | Atom | Angle/°   |
|------|------|------|------------|------|------|------|-----------|
| P1   | Au   | Cl3  | 176.75(12) | C11  | C10  | C5   | 119.6(11) |
| C18  | P1   | Au   | 115.4(4)   | C11  | C10  | C15  | 118.7(10) |
| C18  | P1   | C19  | 101.8(6)   | C15  | C10  | C5   | 121.7(11) |
| C18  | P1   | C25  | 104.6(6)   | C12  | C11  | C10  | 120.5(12) |
| C19  | P1   | Au   | 110.3(4)   | C11  | C12  | C13  | 121.8(12) |
| C25  | P1   | Au   | 114.3(4)   | C12  | C13  | C14  | 118.2(11) |
| C25  | P1   | C19  | 109.4(6)   | C12  | C13  | C16  | 117.9(10) |
| C1   | N1   | C4   | 104.6(11)  | C14  | C13  | C16  | 123.9(11) |
| C1   | N1   | B1   | 128.7(10)  | C15  | C14  | C13  | 120.5(11) |
| C4   | N1   | B1   | 126.5(10)  | C14  | C15  | C10  | 120.3(11) |
| C6   | N2   | B1   | 124.7(11)  | O1   | C16  | N3   | 121.2(10) |
| C9   | N2   | C6   | 108.2(11)  | O1   | C16  | C13  | 120.3(10) |
| C9   | N2   | B1   | 126.7(11)  | N3   | C16  | C13  | 118.4(10) |
| C16  | N3   | C17  | 122.4(10)  | N3   | C17  | C18  | 112.8(9)  |
| N1   | C1   | Cl1  | 121.1(11)  | C17  | C18  | P1   | 115.7(8)  |
| N1   | C1   | C2   | 112.5(11)  | C20  | C19  | P1   | 120.7(10) |
| C2   | C1   | Cl1  | 126.3(12)  | C20  | C19  | C24  | 120.1(13) |
| C3   | C2   | C1   | 105.9(13)  | C24  | C19  | P1   | 118.8(10) |
| C2   | C3   | C4   | 107.1(12)  | C19  | C20  | C21  | 120.4(13) |
| N1   | C4   | C3   | 109.9(11)  | C22  | C21  | C20  | 121.0(14) |
| N1   | C4   | C5   | 120.3(12)  | C21  | C22  | C23  | 118.2(14) |
| C3   | C4   | C5   | 129.8(11)  | C22  | C23  | C24  | 122.3(13) |
| C4   | C5   | C10  | 118.3(11)  | C19  | C24  | C23  | 118.0(13) |
| C6   | C5   | C4   | 120.1(11)  | C26  | C25  | P1   | 123.8(11) |
| C6   | C5   | C10  | 121.6(11)  | C26  | C25  | C30  | 118.6(12) |
| N2   | C6   | C7   | 106.4(11)  | C30  | C25  | P1   | 117.6(10) |
| C5   | C6   | N2   | 122.0(11)  | C25  | C26  | C27  | 122.1(14) |
| C5   | C6   | C7   | 131.6(12)  | C26  | C27  | C28  | 120.0(13) |
| C8   | C7   | C6   | 108.9(13)  | C29  | C28  | C27  | 120.3(13) |
| C7   | C8   | C9   | 107.0(15)  | C28  | C29  | C30  | 120.4(14) |
| N2   | C9   | Cl2  | 121.5(11)  | C29  | C30  | C25  | 118.6(13) |
| N2   | C9   | C8   | 109.5(13)  | F1   | B1   | F2   | 110.1(10) |
| C8   | C9   | Cl2  | 129.0(13)  | F1   | B1   | N1   | 111.1(12) |

| Atom | Atom | Atom | Angle/°   |
|------|------|------|-----------|
| F1   | B1   | N2   | 110.2(10) |
| F2   | B1   | N1   | 109.4(11) |
| F2   | B1   | N2   | 110.0(12) |
| N1   | B1   | N2   | 106.0(9)  |
| Cl4  | C31  | Cl5  | 112.9     |
| Cl7  | C32  | Cl6  | 112.9     |

Table S 40: Hydrogen Fractional Atomic Coordinates ( $\times 10^4$ ) and Equivalent Isotropic Displacement Parameters ( $\text{\AA}^2 \times 10^3$ ) for BODI-Au-10.  $U_{eq}$  is defined as 1/3 of the trace of the orthogonalised  $U_{ij}$ .

| Atom | x       | y        | z       | $U_{eq}$ |
|------|---------|----------|---------|----------|
| H3   | 7559.87 | 5170.87  | 2566.45 | 52       |
| H2   | 7080.28 | 1860.47  | 5273.4  | 84       |
| H3A  | 7377.13 | 2591.8   | 4514.26 | 73       |
| H7   | 9148.84 | 5827.86  | 4089.69 | 90       |
| H8   | 9766.36 | 6953.04  | 4607.97 | 117      |
| H11  | 8182.12 | 1839.41  | 4064.56 | 64       |
| H12  | 7977.89 | 1498.06  | 3337.11 | 59       |
| H14  | 7959.85 | 5755.35  | 3135.16 | 52       |
| H15  | 8184.53 | 6115.54  | 3869.13 | 59       |
| H17A | 7421.39 | 3065.51  | 1935.94 | 52       |
| H17B | 7657.55 | 4579.47  | 1801.03 | 52       |
| H18A | 6782.94 | 4566.12  | 1600.71 | 54       |
| H18B | 6853.24 | 5685.45  | 1992.19 | 54       |
| H20  | 5899.51 | 4879.55  | 1417.74 | 73       |
| H21  | 5222.71 | 6415     | 1240.34 | 77       |
| H22  | 4704.23 | 7396.3   | 1789.02 | 79       |
| H23  | 4856.57 | 6762.09  | 2516.81 | 77       |
| H24  | 5523.65 | 5167.6   | 2707.85 | 69       |
| H26  | 6442.74 | 2549.46  | 1346.77 | 67       |
| H27  | 6378.79 | 292.78   | 1052.93 | 69       |
| H28  | 6157.69 | -1617.99 | 1500.87 | 71       |
| H29  | 6052.72 | -1299.86 | 2250.21 | 79       |
| H30  | 6130.74 | 1000.73  | 2563.52 | 65       |
| H31A | 4315.72 | 2906.85  | 6063.33 | 115      |
| H31B | 4083.26 | 3756.85  | 6476.11 | 115      |
| H32A | 4386.11 | 5526.76  | 4788.58 | 143      |
| H32B | 4162.12 | 4213.57  | 4511.5  | 143      |

Table S 41: Hydrogen Bond information for **BODI-Au-10**.

| D  | H  | A               | d(D-H)/Å | d(H-A)/Å | d(D-A)/Å  | D-H-A/deg |
|----|----|-----------------|----------|----------|-----------|-----------|
| N3 | H3 | O1 <sup>1</sup> | 0.88     | 1.96     | 2.742(13) | 146.6     |

1/2-x, 1/2+y, +z

Table S 42: Atomic Occupancies for all atoms that are not fully occupied in **BODI-Au-10**.

| Atom | Occupancy |
|------|-----------|
| Cl6  | 0.75      |
| Cl7  | 0.75      |
| C32  | 0.75      |
| H32A | 0.75      |
| H32B | 0.75      |

## SHAPE Analysis

The corresponding coordination polyhedra are generally described in terms of four idealized geometries with equal distances between the center and all vertices: the trigonal planar (TP-3), the pyramid (vacant tetrahedron) (vT3), the fac-trivacant octahedron (fac-vOC-3), and the mer-trivacant octahedron (T-shape) (mer-vOC-3). As a general approach, shape analysis of coordination polyhedra provides a quantitative mean for evaluating the departure of an experimental (Q) from an ideal archetypal stereochemistry (P). The Continuous Shape Measure (CShM) criterion  $S_Q(P)$  [Equation (1)] introduced by Avnir and coworkers reflects the minimal normalized square deviation between the Cartesian coordinates of each vertex belonging to the actual coordination polyhedron Q and a perfect reference geometry P. Accordingly,  $S_Q(P)$  ranges between 0 and 100, a closer structural match giving a lower  $S_Q(P)$  value. Casanova and coworkers reported shape maps and reference polyhedral.

$$S_Q(P) = \frac{\sum_{k=1}^N |Q_k - P_k|^2}{\sum_{k=1}^N |Q_k - Q_0|^2} \times 100 \quad \text{with} \quad Q_0 = \frac{1}{N} \sum_{k=1}^N Q_k \quad (1)$$

The lowest values of  $S_Q(P)$ , as determined by continuous shape measure calculations using the SHAPE 2.1 program (M. Llunell, D. Casanova, J. Cirera, P. Alemany, S. Alvarez, *SHAPE*, v. 2.1, University of Barcelona, Spain, 2013, [Erreur ! Source du renvoi introuvable.9](#)), correspond systematically to the four ideal geometries TP-3, vT3, fac-vOC-3 and mer-vOC-3. According to [Erreur ! Source du renvoi introuvable.9](#), the metal centers are found in an T-shape (mer-vOC-3) environment.

Table S 43: Continuous Shape Measure values  $S_Q(P)$  calculated for the coordination polyhedra found in the crystal structures of complexes **BODI-Au-7** and **BODI-Au-10**. Limiting values corresponding to the ideal reference geometries are also included.<sup>[a]</sup>

| Polyhedron (Q)    | $S_Q(\text{TP-3})$ | $S_Q(\text{vT3})$ | $S_Q(\text{fac-vOC-3})$ | $S_Q(\text{mer-vOC-3})$ | Geometry  |
|-------------------|--------------------|-------------------|-------------------------|-------------------------|-----------|
| <b>BODI-Au-7</b>  | 5.567              | 7.322             | 13.548                  | <b>3.373</b>            | mer-vOC-3 |
| <b>BODI-Au-10</b> | 5.930              | 8.500             | 15.391                  | <b>3.764</b>            | mer-vOC-3 |

<sup>[a]</sup> Bold-faced numbers correspond to the lowest  $S_Q(P)$  values calculated according to Equation (1) by the Shape 2.1 program. The considered ideal reference geometries (P) are the trigonal planar (TP-3), the pyramid (vacant tetrahedron) (vT3), the fac-trivacant octahedron (fac-vOC-3), and the mer-trivacant octahedron (T-shape) (mer-vOC-3).

## References

- 1 Dupré Nathalie, Brazel Christian, Fensterbank Louis, Malacria Max, Thorimbert Serge, Hasenknopf Bernold and Lacôte Emmanuel, *Chem. – Eur. J.*, 2012, **18**, 12962–12965.
- 2 T. Rohand, M. Baruah, W. Qin, N. Boens and W. Dehaen, *Chem. Commun.*, 2006, 266–268.
- 3 M. Laine, N. A. Barbosa, A. Kochel, B. Osiecka, G. Szewczyk, T. Sarna, P. Ziółkowski, R. Wieczorek and A. Filarowski, *Sens. Actuators B Chem.*, 2017, **238**, 548–555.
- 4 M. Fischer and J. Georges, *Chem. Phys. Lett.*, 1996, **260**, 115–118.
- 5 M. J. Frisch, Gaussian 09. Revision D. 01., Gaussian. Inc., Wallingford CT, 2009.
- 6 Y. Zhao and D. G. Truhlar, *Theor. Chem. Acc.*, 2008, **120**, 215–241.
- 7 N. Chéron, D. Jacquemin and P. Fleurat-Lessard, *Phys. Chem. Chem. Phys.*, 2012, **14**, 7170–7175.
- 8 N. Chéron, R. Ramozzi, L. E. Kaïm, L. Grimaud and P. Fleurat-Lessard, *J. Org. Chem.*, 2012, **77**, 1361–1366.
- 9 J. Tomasi, B. Mennucci and R. Cammi, *Chem. Rev.*, 2005, **105**, 2999–3094.
- 10 B. Mennucci, J. Tomasi, R. Cammi, J. R. Cheeseman, M. J. Frisch, F. J. Devlin, S. Gabriel and P. J. Stephens, *J. Phys. Chem. A*, 2002, **106**, 6102–6113.
- 11 G. Andrienko, <http://www.chemcraftprog.com>.
- 12 K. Fukui, T. Yonezawa and H. Shingu, *J. Chem. Phys.*, 1952, **20**, 722–725.
- 13 L.-G. Zhuo, W. Liao and Z.-X. Yu, *Asian J. Org. Chem.*, 2012, **1**, 336–345.

## References XRD

- O.V. Dolomanov and L.J. Bourhis and R.J. Gildea and J.A.K. Howard and H. Puschmann, Olex2: A complete structure solution, refinement and analysis program, *J. Appl. Cryst.*, 2009, **42**, 339–341.
- Sheldrick, G.M., Crystal structure refinement with ShelXL, *Acta Cryst.*, 2015, **C27**, 3–8.
- Sheldrick, G.M., ShelXT-Integrated space-group and crystal-structure determination, *Acta Cryst.*, 2015, **A71**, 3–8.
- Software for the Integration of CCD Detector System Bruker Analytical X-ray Systems, Bruker axs, Madison, WI (after 2013).
